# Supplementary material for: Integration of segmented regression analysis with weighted gene correlation network analysis identifies genes whose expression is remodeled throughout physiological aging in mouse tissues
Source: PubMed Central journal article supplement (PMC8351669; doi:10.18632/aging.203379), 2021-07-29
Supplement: aging-13-203379-s008.pdf [file aging-13-203379-s008.pdf]

**Supplementary Table 7. Genes in common between tissues.**

| <b>Tissue overlap</b> | <b>Genes in common</b>                     |
|-----------------------|--------------------------------------------|
| Heart-Liver           | <i>Map1lc3b, Phyh, Psmc4, Smpd1, Yipf3</i> |

Genes considered resulted from the overlap between Trendy genes with hub genes in each tissue. In tissues with more than one significant module (i.e., the heart, the liver, and the muscle), the gene lists consist in the combination of each module's intersection. Relates to the left panel of Figure 5.
