# Supplementary material for: Integration of segmented regression analysis with weighted gene correlation network analysis identifies genes whose expression is remodeled throughout physiological aging in mouse tissues
Source: publisher site journal article supplement (doi:10.18632/aging.203379), 2021-07-29
Supplement: Supplementary file [file aging-v13i14-203379-supplementary-material-SD3.pdf]

## SUPPLEMENTARY TABLES

**Supplementary Table 1. Inter-tissue differences in breakpoint distribution.**

|          | Brain     | Heart     | Liver     | Muscle    | Pancreas |
|----------|-----------|-----------|-----------|-----------|----------|
| Brain    | -         | -         | -         | -         | -        |
| Heart    | 5.60e-01  | -         | -         | -         | -        |
| Liver    | 9.99e-01  | 5.03e-01  | -         | -         | -        |
| Muscle   | 5.14e-13* | 1.22e-27* | 4.26e-26* | -         | -        |
| Pancreas | 5.50e-01  | 9.58e-02  | 4.50e-01  | 3.44e-21* | -        |

Kruskal-Wallis  $p$ -value < 2.2e-16.

\*depicts statistical significance (adjusted  $p$ -value < 0.05).

Statistical testing was performed using the non-parametric Kruskal Wallis test, followed by post-hoc Dunn's multiple comparison test, and adjusted  $p$ -values are presented.  $p$ -value adjustment was performed using the Benjamini-Hochberg method. H0 states no difference between tissues. Relates to Figure 1C.

**Supplementary Table 2. Enrichment of protein coding and long non-coding RNAs (lncRNAs) in each tissue's top dynamic (Trendy) genes.**

| Tissue   | Proportion of PC genes within Trendy genes | Proportion of PC genes within reference genome | PC enrichment $p$ -value | Proportion of lncRNAs within Trendy genes | Proportion of lncRNAs within reference genome | lncRNA under-enrichment $p$ -value |
|----------|--------------------------------------------|------------------------------------------------|--------------------------|-------------------------------------------|-----------------------------------------------|------------------------------------|
| Brain    | 0.86                                       |                                                | 8.277036e-124            | 0.07                                      |                                               | 1.736139e-15                       |
| Heart    | 0.83                                       |                                                | 3.558923e-245            | 0.07                                      |                                               | 5.160152e-34                       |
| Liver    | 0.9                                        | 0.43                                           | 0.000000e+00             | 0.05                                      | 0.18                                          | 1.643966e-89                       |
| Muscle   | 0.9                                        |                                                | 1.141175e-199            | 0.06                                      |                                               | 1.568121e-24                       |
| Pancreas | 0.88                                       |                                                | 1.450038e-61             | 0.07                                      |                                               | 8.077910e-08                       |

PC – protein coding.

lncRNAs – long non-coding RNAs.

Statistical testing was performed using Fisher's Exact Test; H0 implies the proportion of each biotype being equal to the proportion of that biotype in the reference genome's annotation. Relates to Figure 1E.
