# Supplementary material for: Integration of segmented regression analysis with weighted gene correlation network analysis identifies genes whose expression is remodeled throughout physiological aging in mouse tissues
Source: publisher site journal article supplement (doi:10.18632/aging.203379), 2021-07-29
Supplement: Supplementary file [file aging-v13i14-203379-supplementary-material-SD10.pdf]

**Supplementary Table 9. Sample characterization.**

| <b>Brain</b> |                        |        |       |                                                      |        |       |                                                 |        |       |
|--------------|------------------------|--------|-------|------------------------------------------------------|--------|-------|-------------------------------------------------|--------|-------|
| Age (mo.)    | Initial no. of samples |        |       | No. of samples after removal of low coverage samples |        |       | No. of samples after removal of outlier samples |        |       |
|              | Male                   | Female | Total | Male                                                 | Female | Total | Male                                            | Female | Total |
| 3            | 4                      | 2      | 6     | 4                                                    | 2      | 6     | 4                                               | 2      | 6     |
| 6            | 4                      | 2      | 6     | 4                                                    | 2      | 6     | 4                                               | 2      | 6     |
| 9            | 4                      | 2      | 6     | 4                                                    | 2      | 6     | 4                                               | 1      | 5     |
| 12           | 4                      | 2      | 6     | 4                                                    | 2      | 6     | 4                                               | 2      | 6     |
| 15           | 4                      | 2      | 6     | 4                                                    | 2      | 6     | 4                                               | 1      | 5     |
| 18           | 4                      | 2      | 6     | 4                                                    | 2      | 6     | 4                                               | 2      | 6     |
| 21           | 4                      | 2      | 6     | 3                                                    | 2      | 5     | 3                                               | 2      | 5     |
| 24           | 4                      | 0      | 4     | 4                                                    | 0      | 4     | 4                                               | 0      | 4     |
| 27           | 4                      | 0      | 4     | 3                                                    | 0      | 3     | 3                                               | 0      | 3     |

  

| <b>Heart</b> |                        |        |       |                                                      |        |       |                                                 |        |       |
|--------------|------------------------|--------|-------|------------------------------------------------------|--------|-------|-------------------------------------------------|--------|-------|
| Age (mo.)    | Initial no. of samples |        |       | No. of samples after removal of low coverage samples |        |       | No. of samples after removal of outlier samples |        |       |
|              | Male                   | Female | Total | Male                                                 | Female | Total | Male                                            | Female | Total |
| 3            | 4                      | 1      | 5     | 4                                                    | 1      | 5     | 4                                               | 1      | 5     |
| 6            | 4                      | 2      | 6     | 4                                                    | 1      | 5     | 4                                               | 1      | 5     |
| 9            | 4                      | 2      | 6     | 4                                                    | 2      | 6     | 4                                               | 2      | 6     |
| 12           | 4                      | 2      | 6     | 4                                                    | 2      | 6     | 4                                               | 1      | 5     |
| 15           | 4                      | 2      | 6     | 4                                                    | 2      | 6     | 4                                               | 2      | 6     |
| 18           | 3                      | 2      | 5     | 3                                                    | 2      | 5     | 3                                               | 1      | 4     |
| 21           | 4                      | 2      | 6     | 4                                                    | 2      | 6     | 4                                               | 2      | 6     |
| 24           | 4                      | 0      | 4     | 4                                                    | 0      | 4     | 4                                               | 0      | 4     |
| 27           | 4                      | 0      | 4     | 4                                                    | 0      | 4     | 4                                               | 0      | 4     |

  

| <b>Liver</b> |                        |        |       |                                                      |        |       |                                                 |        |       |
|--------------|------------------------|--------|-------|------------------------------------------------------|--------|-------|-------------------------------------------------|--------|-------|
| Age (mo.)    | Initial no. of samples |        |       | No. of samples after removal of low coverage samples |        |       | No. of samples after removal of outlier samples |        |       |
|              | Male                   | Female | Total | Male                                                 | Female | Total | Male                                            | Female | Total |
| 3            | 4                      | 2      | 6     | 4                                                    | 2      | 6     | 4                                               | 2      | 6     |
| 6            | 4                      | 2      | 6     | 4                                                    | 2      | 6     | 4                                               | 2      | 6     |
| 9            | 4                      | 2      | 6     | 3                                                    | 1      | 4     | 3                                               | 1      | 4     |
| 12           | 4                      | 2      | 6     | 4                                                    | 2      | 6     | 4                                               | 2      | 6     |
| 15           | 4                      | 2      | 6     | 4                                                    | 2      | 6     | 4                                               | 2      | 6     |
| 18           | 4                      | 2      | 6     | 3                                                    | 2      | 5     | 3                                               | 2      | 5     |
| 21           | 4                      | 2      | 6     | 4                                                    | 2      | 6     | 4                                               | 1      | 5     |
| 24           | 3                      | 0      | 3     | 3                                                    | 0      | 3     | 3                                               | 0      | 3     |
| 27           | 4                      | 0      | 4     | 4                                                    | 0      | 4     | 3                                               | 0      | 3     |

  

| <b>Muscle</b> |                        |        |       |                                                      |        |       |                                                 |        |       |
|---------------|------------------------|--------|-------|------------------------------------------------------|--------|-------|-------------------------------------------------|--------|-------|
| Age (mo.)     | Initial no. of samples |        |       | No. of samples after removal of low coverage samples |        |       | No. of samples after removal of outlier samples |        |       |
|               | Male                   | Female | Total | Male                                                 | Female | Total | Male                                            | Female | Total |
| 3             | 4                      | 2      | 6     | 4                                                    | 2      | 6     | 4                                               | 2      | 6     |
| 6             | 3                      | 2      | 5     | 3                                                    | 2      | 5     | 3                                               | 1      | 4     |
| 9             | 4                      | 2      | 6     | 4                                                    | 2      | 6     | 4                                               | 2      | 6     |
| 12            | 4                      | 2      | 6     | 4                                                    | 2      | 6     | 3                                               | 2      | 5     |
| 15            | 4                      | 2      | 6     | 4                                                    | 2      | 6     | 4                                               | 2      | 6     |
| 18            | 4                      | 2      | 6     | 4                                                    | 2      | 6     | 4                                               | 2      | 6     |
| 21            | 4                      | 2      | 6     | 3                                                    | 2      | 5     | 3                                               | 2      | 5     |
| 24            | 3                      | 0      | 3     | 3                                                    | 0      | 3     | 2                                               | 0      | 2     |
| 27            | 4                      | 0      | 4     | 4                                                    | 0      | 4     | 3                                               | 0      | 3     |

  

| <b>Pancreas</b> |                        |        |       |                                                      |        |       |                                                 |        |       |
|-----------------|------------------------|--------|-------|------------------------------------------------------|--------|-------|-------------------------------------------------|--------|-------|
| Age (mo.)       | Initial no. of samples |        |       | No. of samples after removal of low coverage samples |        |       | No. of samples after removal of outlier samples |        |       |
|                 | Male                   | Female | Total | Male                                                 | Female | Total | Male                                            | Female | Total |
| 3               | 4                      | 2      | 6     | 3                                                    | 0      | 3     | 3                                               | 0      | 3     |
| 6               | 4                      | 2      | 6     | 3                                                    | 1      | 4     | 3                                               | 1      | 4     |

|    |   |   |   |   |   |   |   |   |   |
|----|---|---|---|---|---|---|---|---|---|
| 9  | 4 | 2 | 6 | 2 | 2 | 4 | 2 | 2 | 4 |
| 12 | 4 | 2 | 6 | 3 | 2 | 5 | 3 | 2 | 5 |
| 15 | 4 | 2 | 6 | 4 | 1 | 5 | 3 | 1 | 4 |
| 18 | 4 | 2 | 6 | 2 | 2 | 4 | 2 | 1 | 3 |
| 21 | 4 | 2 | 6 | 2 | 1 | 3 | 2 | 1 | 3 |
| 24 | 4 | 0 | 4 | 2 | 0 | 2 | 2 | 0 | 2 |
| 27 | 4 | 0 | 4 | 4 | 0 | 4 | 3 | 0 | 3 |

---

*mo.* – months; *no.* – number.
