# Supplementary material for: Integration of segmented regression analysis with weighted gene correlation network analysis identifies genes whose expression is remodeled throughout physiological aging in mouse tissues
Source: Aging (Albany NY). 2021 Jul 29;13(14):18150–90. doi: 10.18632/aging.203379 (PMC8351669; doi:10.18632/aging.203379)
Supplement: Supplementary Table 3 [file aging-13-203379-s004.docx]

**Supplementary Table 3. Global characterization of WGCNA modules.** Tissue-specific modules of co-expressed genes and number of genes in each module. In all networks, the *grey* module contains unassigned genes. Relates to Figure 2.

| **Tissue** | **Module** | **No. of Genes** | **Total no. of Genes** |
| --- | --- | --- | --- |
| Brain | Black | 411 | 34164 |
| Blue | 1818 |
| Brown | 1006 |
| Cyan | 120 |
| Darkgreen | 69 |
| Darkgrey | 59 |
| Darkred | 73 |
| Darkturquoise | 64 |
| Green | 778 |
| Greenyellow | 283 |
| Grey | 17870 |
| Grey60 | 97 |
| Lightcyan | 108 |
| Lightgreen | 97 |
| Lightyellow | 85 |
| Magenta | 369 |
| Midnightblue | 108 |
| Pink | 372 |
| Purple | 368 |
| Red | 613 |
| Royalblue | 82 |
| Salmon | 129 |
| Tan | 220 |
| Turquoise | 8126 |
| Yellow | 839 |
| Heart | Black | 245 | 28073 |
| Blue | 1209 |
| Brown | 904 |
| Cyan | 99 |
| Green | 415 |
| Greenyellow | 135 |
| Grey | 14055 |
| Grey60 | 64 |
| Lightcyan | 71 |
| Lightgreen | 63 |
| Lightyellow | 61 |
| Magenta | 154 |
| Midnightblue | 90 |
| Pink | 181 |
| Purple | 143 |
| Red | 257 |
| Salmon | 107 |
| Tan | 125 |
| Turquoise | 9039 |
| Yellow | 656 |
| Liver | Black | 482 | 20157 |
| Blue | 954 |
| Brown | 791 |
| Cyan | 223 |
| Darkgreen | 122 |
| Darkgrey | 116 |
| Darkmagenta | 66 |
| Darkolivegreen | 70 |
| Darkorange | 97 |
| Darkred | 123 |
| Darkturquoise | 118 |
| Green | 595 |
| Greenyellow | 293 |
| Grey | 6603 |
| Grey60 | 182 |
| Lightcyan | 192 |
| Lightgreen | 178 |
| Lightyellow | 158 |
| Magenta | 416 |
| Midnightblue | 217 |
| Orange | 110 |
| Paleturquoise | 71 |
| Pink | 449 |
| Purple | 346 |
| Red | 536 |
| Royalblue | 146 |
| Saddlebrown | 87 |
| Salmon | 232 |
| Sienna3 | 64 |
| Skyblue | 87 |
| Steelblue | 82 |
| Tan | 267 |
| Turquoise | 4772 |
| Violet | 70 |
| White | 93 |
| Yellow | 687 |
| Yellowgreen | 62 |
| Muscle | Black | 241 | 18977 |
| Blue | 949 |
| Brown | 806 |
| Cyan | 88 |
| Darkred | 59 |
| Green | 518 |
| Greenyellow | 140 |
| Grey | 9336 |
| Grey60 | 81 |
| Lightcyan | 84 |
| Lightgreen | 73 |
| Lightyellow | 64 |
| Magenta | 203 |
| Midnightblue | 88 |
| Pink | 214 |
| Purple | 174 |
| Red | 484 |
| Royalblue | 62 |
| Salmon | 92 |
| Tan | 135 |
| Turquosie | 4338 |
| Yellow | 748 |
| Pancreas | Black | 141 | 18411 |
| Blue | 1596 |
| Brown | 981 |
| Green | 496 |
| Grey | 9162 |
| Magenta | 94 |
| Pink | 129 |
| Purple | 55 |
| Red | 475 |
| Turquoise | 4686 |
| Yellow | 596 |
| *Grey* modules comprise unassigned genes | | | |
