# Supplementary material for: Integration of segmented regression analysis with weighted gene correlation network analysis identifies genes whose expression is remodeled throughout physiological aging in mouse tissues
Source: Aging (Albany NY). 2021 Jul 29;13(14):18150–90. doi: 10.18632/aging.203379 (PMC8351669; doi:10.18632/aging.203379)
Supplement: Supplementary Table 10 [file aging-13-203379-s011.xlsx]

## Sheet: allTissues_table_sig
Supplementary Table 10. Tissue-specific estimated parameters of the Trendy fitted model for each top dynamic gene.
Tissue	Feature	Segment1.Slope	Segment2.Slope	Segment3.Slope	Segment4.Slope	Segment5.Slope	Segment6.Slope	Segment7.Slope	Segment8.Slope	Segment1.Trend	Segment2.Trend	Segment3.Trend	Segment4.Trend	Segment5.Trend	Segment6.Trend	Segment7.Trend	Segment8.Trend	Segment1.Pvalue	Segment2.Pvalue	Segment3.Pvalue	Segment4.Pvalue	Segment5.Pvalue	Segment6.Pvalue	Segment7.Pvalue	Segment8.Pvalue	Breakpoint1	Breakpoint2	Breakpoint3	Breakpoint4	Breakpoint5	Breakpoint6	Breakpoint7	AdjustedR2
Brain	C4b	32.595	129.82	NA	NA	NA	NA	NA	NA	1	1	NA	NA	NA	NA	NA	NA	0.0944568	0.0404434	NA	NA	NA	NA	NA	NA	15.9177	NA	NA	NA	NA	NA	NA	0.859057
Brain	Lgals3bp	11.964	46.154	NA	NA	NA	NA	NA	NA	1	1	NA	NA	NA	NA	NA	NA	0.0572981	0.0554337	NA	NA	NA	NA	NA	NA	20.2122	NA	NA	NA	NA	NA	NA	0.815554
Brain	Gfap	56.834	345.57	NA	NA	NA	NA	NA	NA	0	1	NA	NA	NA	NA	NA	NA	0.223697	0.038183	NA	NA	NA	NA	NA	NA	14.535	NA	NA	NA	NA	NA	NA	0.78807
Brain	H2-K1	19.7122	NA	NA	NA	NA	NA	NA	NA	1	NA	NA	NA	NA	NA	NA	NA	7.23e-16	NA	NA	NA	NA	NA	NA	NA	NA	NA	NA	NA	NA	NA	NA	0.773284
Brain	Ctss	15.6517	NA	NA	NA	NA	NA	NA	NA	1	NA	NA	NA	NA	NA	NA	NA	1.92e-14	NA	NA	NA	NA	NA	NA	NA	NA	NA	NA	NA	NA	NA	NA	0.736231
Brain	C3	1.4813	7.4304	NA	NA	NA	NA	NA	NA	0	1	NA	NA	NA	NA	NA	NA	0.149178	0.0530818	NA	NA	NA	NA	NA	NA	17.2015	NA	NA	NA	NA	NA	NA	0.718138
Brain	H2-D1	14.308	59.821	NA	NA	NA	NA	NA	NA	0	1	NA	NA	NA	NA	NA	NA	0.150752	0.0640456	NA	NA	NA	NA	NA	NA	15.2287	NA	NA	NA	NA	NA	NA	0.717734
Brain	Neat1	46.4433	NA	NA	NA	NA	NA	NA	NA	1	NA	NA	NA	NA	NA	NA	NA	3.34e-13	NA	NA	NA	NA	NA	NA	NA	NA	NA	NA	NA	NA	NA	NA	0.698839
Brain	Cd68	0.75967	8.4787	NA	NA	NA	NA	NA	NA	0	1	NA	NA	NA	NA	NA	NA	0.283914	0.0581638	NA	NA	NA	NA	NA	NA	15.9317	NA	NA	NA	NA	NA	NA	0.687698
Brain	Csf1	5.92994	NA	NA	NA	NA	NA	NA	NA	1	NA	NA	NA	NA	NA	NA	NA	2.12e-12	NA	NA	NA	NA	NA	NA	NA	NA	NA	NA	NA	NA	NA	NA	0.673236
Brain	Lgals3	1.0013	4.6925	NA	NA	NA	NA	NA	NA	0	1	NA	NA	NA	NA	NA	NA	0.188905	0.0647213	NA	NA	NA	NA	NA	NA	15.0497	NA	NA	NA	NA	NA	NA	0.661911
Brain	Itgb2	4.14178	NA	NA	NA	NA	NA	NA	NA	1	NA	NA	NA	NA	NA	NA	NA	8.74e-12	NA	NA	NA	NA	NA	NA	NA	NA	NA	NA	NA	NA	NA	NA	0.652019
Brain	Lyz2	7.46	35.852	NA	NA	NA	NA	NA	NA	0	1	NA	NA	NA	NA	NA	NA	0.246428	0.0555017	NA	NA	NA	NA	NA	NA	14.7325	NA	NA	NA	NA	NA	NA	0.641094
Brain	Gpnmb	4.83276	NA	NA	NA	NA	NA	NA	NA	1	NA	NA	NA	NA	NA	NA	NA	3.62e-11	NA	NA	NA	NA	NA	NA	NA	NA	NA	NA	NA	NA	NA	NA	0.63414
Brain	Irf7	0.66884	4.3345	NA	NA	NA	NA	NA	NA	0	1	NA	NA	NA	NA	NA	NA	0.250277	0.0610053	NA	NA	NA	NA	NA	NA	14.9917	NA	NA	NA	NA	NA	NA	0.633853
Brain	Irf9	3.30066	NA	NA	NA	NA	NA	NA	NA	1	NA	NA	NA	NA	NA	NA	NA	7.06e-11	NA	NA	NA	NA	NA	NA	NA	NA	NA	NA	NA	NA	NA	NA	0.624781
Brain	Oasl2	4.44581	NA	NA	NA	NA	NA	NA	NA	1	NA	NA	NA	NA	NA	NA	NA	4.23e-11	NA	NA	NA	NA	NA	NA	NA	NA	NA	NA	NA	NA	NA	NA	0.624541
Brain	Serpina3n	2.01	21.95	NA	NA	NA	NA	NA	NA	0	1	NA	NA	NA	NA	NA	NA	0.296965	0.0645362	NA	NA	NA	NA	NA	NA	16.4079	NA	NA	NA	NA	NA	NA	0.610905
Brain	Clec7a	-0.21317	4.197	NA	NA	NA	NA	NA	NA	0	1	NA	NA	NA	NA	NA	NA	0.430041	0.0618684	NA	NA	NA	NA	NA	NA	12.2986	NA	NA	NA	NA	NA	NA	0.606882
Brain	Ifit3	5.73929	NA	NA	NA	NA	NA	NA	NA	1	NA	NA	NA	NA	NA	NA	NA	1.62e-10	NA	NA	NA	NA	NA	NA	NA	NA	NA	NA	NA	NA	NA	NA	0.599608
Brain	Pcdhb5	-0.061079	2.5419	NA	NA	NA	NA	NA	NA	0	1	NA	NA	NA	NA	NA	NA	0.465494	0.0601219	NA	NA	NA	NA	NA	NA	13.403	NA	NA	NA	NA	NA	NA	0.58592
Brain	Ctsh	3.0662	NA	NA	NA	NA	NA	NA	NA	1	NA	NA	NA	NA	NA	NA	NA	2.34e-09	NA	NA	NA	NA	NA	NA	NA	NA	NA	NA	NA	NA	NA	NA	0.584194
Brain	Gbp3	3.23387	NA	NA	NA	NA	NA	NA	NA	1	NA	NA	NA	NA	NA	NA	NA	4.35e-10	NA	NA	NA	NA	NA	NA	NA	NA	NA	NA	NA	NA	NA	NA	0.583874
Brain	Psmb8	2.03188	NA	NA	NA	NA	NA	NA	NA	1	NA	NA	NA	NA	NA	NA	NA	5.23e-10	NA	NA	NA	NA	NA	NA	NA	NA	NA	NA	NA	NA	NA	NA	0.580286
Brain	Ifi27	8.27789	NA	NA	NA	NA	NA	NA	NA	1	NA	NA	NA	NA	NA	NA	NA	4.63e-10	NA	NA	NA	NA	NA	NA	NA	NA	NA	NA	NA	NA	NA	NA	0.579898
Brain	Bmp7	2.9967	20.361	NA	NA	NA	NA	NA	NA	0	1	NA	NA	NA	NA	NA	NA	0.132915	0.0760356	NA	NA	NA	NA	NA	NA	20.4748	NA	NA	NA	NA	NA	NA	0.575447
Brain	Pcdhb8	3.17179	NA	NA	NA	NA	NA	NA	NA	1	NA	NA	NA	NA	NA	NA	NA	1.27e-09	NA	NA	NA	NA	NA	NA	NA	NA	NA	NA	NA	NA	NA	NA	0.56176
Brain	Abca8a	10.467	2.3272	NA	NA	NA	NA	NA	NA	1	0	NA	NA	NA	NA	NA	NA	0.0912384	0.149061	NA	NA	NA	NA	NA	NA	9.9323	NA	NA	NA	NA	NA	NA	0.561178
Brain	Laptm5	9.50211	NA	NA	NA	NA	NA	NA	NA	1	NA	NA	NA	NA	NA	NA	NA	1.78e-09	NA	NA	NA	NA	NA	NA	NA	NA	NA	NA	NA	NA	NA	NA	0.559142
Brain	Lag3	4.07716	NA	NA	NA	NA	NA	NA	NA	1	NA	NA	NA	NA	NA	NA	NA	2.19e-09	NA	NA	NA	NA	NA	NA	NA	NA	NA	NA	NA	NA	NA	NA	0.550058
Brain	Pcdhb9	6.24525	NA	NA	NA	NA	NA	NA	NA	1	NA	NA	NA	NA	NA	NA	NA	2.25e-09	NA	NA	NA	NA	NA	NA	NA	NA	NA	NA	NA	NA	NA	NA	0.548517
Brain	Ifit3b	2.66139	NA	NA	NA	NA	NA	NA	NA	1	NA	NA	NA	NA	NA	NA	NA	3.21e-09	NA	NA	NA	NA	NA	NA	NA	NA	NA	NA	NA	NA	NA	NA	0.548017
Brain	Serping1	1.1024	7.8688	NA	NA	NA	NA	NA	NA	0	1	NA	NA	NA	NA	NA	NA	0.295892	0.0749792	NA	NA	NA	NA	NA	NA	14.9484	NA	NA	NA	NA	NA	NA	0.533832
Brain	Pcdhga7	4.37669	NA	NA	NA	NA	NA	NA	NA	1	NA	NA	NA	NA	NA	NA	NA	5.7e-09	NA	NA	NA	NA	NA	NA	NA	NA	NA	NA	NA	NA	NA	NA	0.530437
Brain	Gm28476	-86.703	11.508	-1.1679	-0.083921	NA	NA	NA	NA	-1	0	-1	0	NA	NA	NA	NA	0.0977487	0.339432	0.0988186	0.276215	NA	NA	NA	NA	3.39101	6.65776	12.0699	NA	NA	NA	NA	0.526533
Brain	Aebp1	3.9059	33.921	NA	NA	NA	NA	NA	NA	0	1	NA	NA	NA	NA	NA	NA	0.193469	0.0923506	NA	NA	NA	NA	NA	NA	19.31	NA	NA	NA	NA	NA	NA	0.524819
Brain	Stat1	4.72742	NA	NA	NA	NA	NA	NA	NA	1	NA	NA	NA	NA	NA	NA	NA	9.3e-09	NA	NA	NA	NA	NA	NA	NA	NA	NA	NA	NA	NA	NA	NA	0.524127
Brain	Gpr34	1.27277	NA	NA	NA	NA	NA	NA	NA	1	NA	NA	NA	NA	NA	NA	NA	0.00409078	NA	NA	NA	NA	NA	NA	NA	NA	NA	NA	NA	NA	NA	NA	0.518412
Brain	Cd9	-15.733	18.036	NA	NA	NA	NA	NA	NA	0	1	NA	NA	NA	NA	NA	NA	0.147044	0.0522708	NA	NA	NA	NA	NA	NA	10.2533	NA	NA	NA	NA	NA	NA	0.515916
Brain	Ptpn6	2.18614	NA	NA	NA	NA	NA	NA	NA	1	NA	NA	NA	NA	NA	NA	NA	1.38e-08	NA	NA	NA	NA	NA	NA	NA	NA	NA	NA	NA	NA	NA	NA	0.509517
Brain	Zc3hav1	3.42543	NA	NA	NA	NA	NA	NA	NA	1	NA	NA	NA	NA	NA	NA	NA	1.58e-08	NA	NA	NA	NA	NA	NA	NA	NA	NA	NA	NA	NA	NA	NA	0.508974
Brain	Sox11	-320.36	-3.9083	NA	NA	NA	NA	NA	NA	0	-1	NA	NA	NA	NA	NA	NA	0.32509	0.0867403	NA	NA	NA	NA	NA	NA	3.1973	NA	NA	NA	NA	NA	NA	0.506681
Brain	B2m	21.1315	NA	NA	NA	NA	NA	NA	NA	1	NA	NA	NA	NA	NA	NA	NA	1.74e-08	NA	NA	NA	NA	NA	NA	NA	NA	NA	NA	NA	NA	NA	NA	0.504165
Brain	Slc11a1	1.9861	NA	NA	NA	NA	NA	NA	NA	1	NA	NA	NA	NA	NA	NA	NA	1.87e-08	NA	NA	NA	NA	NA	NA	NA	NA	NA	NA	NA	NA	NA	NA	0.503769
Brain	Ctsz	13.2515	NA	NA	NA	NA	NA	NA	NA	1	NA	NA	NA	NA	NA	NA	NA	1.92e-08	NA	NA	NA	NA	NA	NA	NA	NA	NA	NA	NA	NA	NA	NA	0.502887
Brain	C1qa	14.6238	NA	NA	NA	NA	NA	NA	NA	1	NA	NA	NA	NA	NA	NA	NA	2.15e-08	NA	NA	NA	NA	NA	NA	NA	NA	NA	NA	NA	NA	NA	NA	0.502036
Brain	Bst2	1.44169	NA	NA	NA	NA	NA	NA	NA	1	NA	NA	NA	NA	NA	NA	NA	1.91e-08	NA	NA	NA	NA	NA	NA	NA	NA	NA	NA	NA	NA	NA	NA	0.501955
Brain	Uba1y-ps2	0.309237	NA	NA	NA	NA	NA	NA	NA	1	NA	NA	NA	NA	NA	NA	NA	0.0307339	NA	NA	NA	NA	NA	NA	NA	NA	NA	NA	NA	NA	NA	NA	0.501738
Brain	Efemp1	6.66345	NA	NA	NA	NA	NA	NA	NA	1	NA	NA	NA	NA	NA	NA	NA	2.41e-08	NA	NA	NA	NA	NA	NA	NA	NA	NA	NA	NA	NA	NA	NA	0.501568
Brain	Myo1f	1.3627	6.8666	NA	NA	NA	NA	NA	NA	0	1	NA	NA	NA	NA	NA	NA	0.131439	0.0998084	NA	NA	NA	NA	NA	NA	20.1612	NA	NA	NA	NA	NA	NA	0.500808
Brain	Pcdhga8	4.5805	-1.4138	NA	NA	NA	NA	NA	NA	1	0	NA	NA	NA	NA	NA	NA	0.0662418	0.270567	NA	NA	NA	NA	NA	NA	17.2906	NA	NA	NA	NA	NA	NA	0.499415
Brain	Tap1	2.51934	NA	NA	NA	NA	NA	NA	NA	1	NA	NA	NA	NA	NA	NA	NA	2.28e-08	NA	NA	NA	NA	NA	NA	NA	NA	NA	NA	NA	NA	NA	NA	0.499394
Brain	Il10ra	2.4304	-1.5839	NA	NA	NA	NA	NA	NA	1	0	NA	NA	NA	NA	NA	NA	0.0534874	0.244741	NA	NA	NA	NA	NA	NA	18.5322	NA	NA	NA	NA	NA	NA	0.495754
Brain	Hexb	14.6774	NA	NA	NA	NA	NA	NA	NA	1	NA	NA	NA	NA	NA	NA	NA	2.84e-08	NA	NA	NA	NA	NA	NA	NA	NA	NA	NA	NA	NA	NA	NA	0.494844
Brain	Capg	-0.19233	3.574	NA	NA	NA	NA	NA	NA	0	1	NA	NA	NA	NA	NA	NA	0.433692	0.0690605	NA	NA	NA	NA	NA	NA	13.3895	NA	NA	NA	NA	NA	NA	0.4944
Brain	9630013A20Rik	-6.7945	-0.076464	NA	NA	NA	NA	NA	NA	-1	0	NA	NA	NA	NA	NA	NA	0.0724756	0.406342	NA	NA	NA	NA	NA	NA	6.39152	NA	NA	NA	NA	NA	NA	0.494014
Brain	Usp18	2.02282	NA	NA	NA	NA	NA	NA	NA	1	NA	NA	NA	NA	NA	NA	NA	3.88e-08	NA	NA	NA	NA	NA	NA	NA	NA	NA	NA	NA	NA	NA	NA	0.490394
Brain	Rgs4	-59.2993	NA	NA	NA	NA	NA	NA	NA	-1	NA	NA	NA	NA	NA	NA	NA	3.03e-07	NA	NA	NA	NA	NA	NA	NA	NA	NA	NA	NA	NA	NA	NA	0.489386
Brain	Pbdc1	-0.774742	NA	NA	NA	NA	NA	NA	NA	-1	NA	NA	NA	NA	NA	NA	NA	0.0707525	NA	NA	NA	NA	NA	NA	NA	NA	NA	NA	NA	NA	NA	NA	0.488789
Brain	Tap2	4.52879	NA	NA	NA	NA	NA	NA	NA	1	NA	NA	NA	NA	NA	NA	NA	3.94e-08	NA	NA	NA	NA	NA	NA	NA	NA	NA	NA	NA	NA	NA	NA	0.485888
Brain	Ifit1	2.88993	NA	NA	NA	NA	NA	NA	NA	1	NA	NA	NA	NA	NA	NA	NA	6.89e-08	NA	NA	NA	NA	NA	NA	NA	NA	NA	NA	NA	NA	NA	NA	0.4843
Brain	BC106179	0.24502	-69.897	418.79	-1.3682	0.80111	NA	NA	NA	0	0	0	-1	0	NA	NA	NA	0.354491	0.144825	0.118593	0.0763828	0.120225	NA	NA	NA	8.93867	11.5389	11.9906	19.5462	NA	NA	NA	0.483554
Brain	Thbs2	3.68898	NA	NA	NA	NA	NA	NA	NA	1	NA	NA	NA	NA	NA	NA	NA	5.59e-08	NA	NA	NA	NA	NA	NA	NA	NA	NA	NA	NA	NA	NA	NA	0.480728
Brain	Pcdhb14	3.41763	NA	NA	NA	NA	NA	NA	NA	1	NA	NA	NA	NA	NA	NA	NA	7.42e-08	NA	NA	NA	NA	NA	NA	NA	NA	NA	NA	NA	NA	NA	NA	0.479845
Brain	Enpp6	-261.61	3.1193	NA	NA	NA	NA	NA	NA	0	1	NA	NA	NA	NA	NA	NA	0.320829	0.0691121	NA	NA	NA	NA	NA	NA	3.3673	NA	NA	NA	NA	NA	NA	0.477923
Brain	Marcksl1	-54.61	0.83271	NA	NA	NA	NA	NA	NA	-1	0	NA	NA	NA	NA	NA	NA	0.0776138	0.383007	NA	NA	NA	NA	NA	NA	6.95933	NA	NA	NA	NA	NA	NA	0.477899
Brain	Spag6	1.99085	NA	NA	NA	NA	NA	NA	NA	1	NA	NA	NA	NA	NA	NA	NA	9.13e-08	NA	NA	NA	NA	NA	NA	NA	NA	NA	NA	NA	NA	NA	NA	0.474504
Brain	Ly86	2.98724	NA	NA	NA	NA	NA	NA	NA	1	NA	NA	NA	NA	NA	NA	NA	8.57e-08	NA	NA	NA	NA	NA	NA	NA	NA	NA	NA	NA	NA	NA	NA	0.468619
Brain	Il33	18.2205	NA	NA	NA	NA	NA	NA	NA	1	NA	NA	NA	NA	NA	NA	NA	2.01e-07	NA	NA	NA	NA	NA	NA	NA	NA	NA	NA	NA	NA	NA	NA	0.46532
Brain	Irf5	1.51819	NA	NA	NA	NA	NA	NA	NA	1	NA	NA	NA	NA	NA	NA	NA	1.09e-07	NA	NA	NA	NA	NA	NA	NA	NA	NA	NA	NA	NA	NA	NA	0.464308
Brain	Rab20	0.632609	NA	NA	NA	NA	NA	NA	NA	1	NA	NA	NA	NA	NA	NA	NA	1.03e-07	NA	NA	NA	NA	NA	NA	NA	NA	NA	NA	NA	NA	NA	NA	0.46305
Brain	Irgm1	0.32743	3.293	NA	NA	NA	NA	NA	NA	0	1	NA	NA	NA	NA	NA	NA	0.337698	0.0915626	NA	NA	NA	NA	NA	NA	15.555	NA	NA	NA	NA	NA	NA	0.462908
Brain	H2-Q7	2.00973	NA	NA	NA	NA	NA	NA	NA	1	NA	NA	NA	NA	NA	NA	NA	1.27e-07	NA	NA	NA	NA	NA	NA	NA	NA	NA	NA	NA	NA	NA	NA	0.46286
Brain	B230209E15Rik	6.12091	NA	NA	NA	NA	NA	NA	NA	1	NA	NA	NA	NA	NA	NA	NA	1.19e-07	NA	NA	NA	NA	NA	NA	NA	NA	NA	NA	NA	NA	NA	NA	0.46091
Brain	Gbp6	1.28889	NA	NA	NA	NA	NA	NA	NA	1	NA	NA	NA	NA	NA	NA	NA	1.13e-07	NA	NA	NA	NA	NA	NA	NA	NA	NA	NA	NA	NA	NA	NA	0.460527
Brain	Ass1	7.64655	NA	NA	NA	NA	NA	NA	NA	1	NA	NA	NA	NA	NA	NA	NA	1.41e-07	NA	NA	NA	NA	NA	NA	NA	NA	NA	NA	NA	NA	NA	NA	0.458835
Brain	Vim	3.4249	28.815	NA	NA	NA	NA	NA	NA	0	1	NA	NA	NA	NA	NA	NA	0.183236	0.0891658	NA	NA	NA	NA	NA	NA	20.5419	NA	NA	NA	NA	NA	NA	0.458133
Brain	Tnfrsf1b	1.72736	NA	NA	NA	NA	NA	NA	NA	1	NA	NA	NA	NA	NA	NA	NA	5.25e-07	NA	NA	NA	NA	NA	NA	NA	NA	NA	NA	NA	NA	NA	NA	0.457665
Brain	Hs3st2	-6.86481	NA	NA	NA	NA	NA	NA	NA	-1	NA	NA	NA	NA	NA	NA	NA	1.65e-07	NA	NA	NA	NA	NA	NA	NA	NA	NA	NA	NA	NA	NA	NA	0.451071
Brain	C1qc	8.50573	NA	NA	NA	NA	NA	NA	NA	1	NA	NA	NA	NA	NA	NA	NA	2.27e-07	NA	NA	NA	NA	NA	NA	NA	NA	NA	NA	NA	NA	NA	NA	0.450561
Brain	Hvcn1	0.17004	2.2637	NA	NA	NA	NA	NA	NA	0	1	NA	NA	NA	NA	NA	NA	0.351021	0.0771582	NA	NA	NA	NA	NA	NA	17.3491	NA	NA	NA	NA	NA	NA	0.447268
Brain	Upk1b	1.07662	NA	NA	NA	NA	NA	NA	NA	1	NA	NA	NA	NA	NA	NA	NA	2.05e-07	NA	NA	NA	NA	NA	NA	NA	NA	NA	NA	NA	NA	NA	NA	0.445745
Brain	Prrg1	3.4807	-8.6892	NA	NA	NA	NA	NA	NA	1	0	NA	NA	NA	NA	NA	NA	0.0744352	0.235113	NA	NA	NA	NA	NA	NA	21.0027	NA	NA	NA	NA	NA	NA	0.444979
Brain	Ggta1	1.78234	NA	NA	NA	NA	NA	NA	NA	1	NA	NA	NA	NA	NA	NA	NA	3.41e-07	NA	NA	NA	NA	NA	NA	NA	NA	NA	NA	NA	NA	NA	NA	0.442445
Brain	Aspg	1.57488	NA	NA	NA	NA	NA	NA	NA	1	NA	NA	NA	NA	NA	NA	NA	2.57e-07	NA	NA	NA	NA	NA	NA	NA	NA	NA	NA	NA	NA	NA	NA	0.439616
Brain	Cx3cr1	9.69854	NA	NA	NA	NA	NA	NA	NA	1	NA	NA	NA	NA	NA	NA	NA	3.51e-07	NA	NA	NA	NA	NA	NA	NA	NA	NA	NA	NA	NA	NA	NA	0.438547
Brain	Parp12	3.03683	NA	NA	NA	NA	NA	NA	NA	1	NA	NA	NA	NA	NA	NA	NA	3.87e-07	NA	NA	NA	NA	NA	NA	NA	NA	NA	NA	NA	NA	NA	NA	0.436775
Brain	Col6a2	3.80663	NA	NA	NA	NA	NA	NA	NA	1	NA	NA	NA	NA	NA	NA	NA	2.85e-07	NA	NA	NA	NA	NA	NA	NA	NA	NA	NA	NA	NA	NA	NA	0.436771
Brain	Apobec3	105.58	-8.9393	2.5621	NA	NA	NA	NA	NA	0	0	1	NA	NA	NA	NA	NA	0.360324	0.11029	0.0759306	NA	NA	NA	NA	NA	3.5388	9.76698	NA	NA	NA	NA	NA	0.436579
Brain	Pcdhb6	2.3737	NA	NA	NA	NA	NA	NA	NA	1	NA	NA	NA	NA	NA	NA	NA	2.94e-07	NA	NA	NA	NA	NA	NA	NA	NA	NA	NA	NA	NA	NA	NA	0.436333
Brain	Plin4	33.951	-1995.5	0.4285	NA	NA	NA	NA	NA	1	0	0	NA	NA	NA	NA	NA	0.0731383	0.137884	0.41039	NA	NA	NA	NA	NA	8.9396	9.03488	NA	NA	NA	NA	NA	0.433125
Brain	Osbpl6	-5.66112	NA	NA	NA	NA	NA	NA	NA	-1	NA	NA	NA	NA	NA	NA	NA	8.75e-07	NA	NA	NA	NA	NA	NA	NA	NA	NA	NA	NA	NA	NA	NA	0.431462
Brain	Lsp1	1.18214	NA	NA	NA	NA	NA	NA	NA	1	NA	NA	NA	NA	NA	NA	NA	4.69e-07	NA	NA	NA	NA	NA	NA	NA	NA	NA	NA	NA	NA	NA	NA	0.428575
Brain	Lrrtm3	-12.8017	NA	NA	NA	NA	NA	NA	NA	-1	NA	NA	NA	NA	NA	NA	NA	4.62e-07	NA	NA	NA	NA	NA	NA	NA	NA	NA	NA	NA	NA	NA	NA	0.427592
Brain	Ctsd	63.8549	NA	NA	NA	NA	NA	NA	NA	1	NA	NA	NA	NA	NA	NA	NA	7.25e-07	NA	NA	NA	NA	NA	NA	NA	NA	NA	NA	NA	NA	NA	NA	0.423385
Brain	Lgals9	-2.4216	3.2665	NA	NA	NA	NA	NA	NA	0	1	NA	NA	NA	NA	NA	NA	0.212353	0.070564	NA	NA	NA	NA	NA	NA	9.05941	NA	NA	NA	NA	NA	NA	0.422517
Brain	C1qb	13.4727	NA	NA	NA	NA	NA	NA	NA	1	NA	NA	NA	NA	NA	NA	NA	8.2e-07	NA	NA	NA	NA	NA	NA	NA	NA	NA	NA	NA	NA	NA	NA	0.420814
Brain	9430092D12Rik	-352.92	0.024197	NA	NA	NA	NA	NA	NA	-1	0	NA	NA	NA	NA	NA	NA	0.0843442	0.365605	NA	NA	NA	NA	NA	NA	2.98142	NA	NA	NA	NA	NA	NA	0.419734
Brain	H2-T23	3.5098	NA	NA	NA	NA	NA	NA	NA	1	NA	NA	NA	NA	NA	NA	NA	6.1e-07	NA	NA	NA	NA	NA	NA	NA	NA	NA	NA	NA	NA	NA	NA	0.419108
Brain	Trem2	1.80647	NA	NA	NA	NA	NA	NA	NA	1	NA	NA	NA	NA	NA	NA	NA	6.4e-07	NA	NA	NA	NA	NA	NA	NA	NA	NA	NA	NA	NA	NA	NA	0.417444
Brain	H2-Q6	3.32004	NA	NA	NA	NA	NA	NA	NA	1	NA	NA	NA	NA	NA	NA	NA	7.72e-07	NA	NA	NA	NA	NA	NA	NA	NA	NA	NA	NA	NA	NA	NA	0.416419
Brain	Rtp4	1.49928	NA	NA	NA	NA	NA	NA	NA	1	NA	NA	NA	NA	NA	NA	NA	6.5e-07	NA	NA	NA	NA	NA	NA	NA	NA	NA	NA	NA	NA	NA	NA	0.416394
Brain	Tnfrsf1a	2.6516	NA	NA	NA	NA	NA	NA	NA	1	NA	NA	NA	NA	NA	NA	NA	1.15e-06	NA	NA	NA	NA	NA	NA	NA	NA	NA	NA	NA	NA	NA	NA	0.415041
Brain	Gm5173	-0.63045	264.46	-0.48707	NA	NA	NA	NA	NA	0	0	-1	NA	NA	NA	NA	NA	0.133493	0.185631	0.080508	NA	NA	NA	NA	NA	11.9587	11.9908	NA	NA	NA	NA	NA	0.414993
Brain	Brwd3	-1.15326	NA	NA	NA	NA	NA	NA	NA	-1	NA	NA	NA	NA	NA	NA	NA	0.0189059	NA	NA	NA	NA	NA	NA	NA	NA	NA	NA	NA	NA	NA	NA	0.414313
Brain	Fnbp1l	-5.06121	NA	NA	NA	NA	NA	NA	NA	-1	NA	NA	NA	NA	NA	NA	NA	1.39e-06	NA	NA	NA	NA	NA	NA	NA	NA	NA	NA	NA	NA	NA	NA	0.412911
Brain	Slc5a5	4.08656	NA	NA	NA	NA	NA	NA	NA	1	NA	NA	NA	NA	NA	NA	NA	1.11e-06	NA	NA	NA	NA	NA	NA	NA	NA	NA	NA	NA	NA	NA	NA	0.409048
Brain	Car13	-0.12722	2.5954	NA	NA	NA	NA	NA	NA	0	1	NA	NA	NA	NA	NA	NA	0.435742	0.0746031	NA	NA	NA	NA	NA	NA	14.9694	NA	NA	NA	NA	NA	NA	0.406247
Brain	Tmem63a	7.05303	NA	NA	NA	NA	NA	NA	NA	1	NA	NA	NA	NA	NA	NA	NA	1.09e-06	NA	NA	NA	NA	NA	NA	NA	NA	NA	NA	NA	NA	NA	NA	0.405245
Brain	Stoml3	1.3429	-5.5728	1336.9	-52.472	NA	NA	NA	NA	0	0	0	-1	NA	NA	NA	NA	0.335907	0.202084	0.2535	0.0885015	NA	NA	NA	NA	14.4709	23.8825	24.0339	NA	NA	NA	NA	0.404528
Brain	Cyba	2.16549	NA	NA	NA	NA	NA	NA	NA	1	NA	NA	NA	NA	NA	NA	NA	1.08e-06	NA	NA	NA	NA	NA	NA	NA	NA	NA	NA	NA	NA	NA	NA	0.401736
Brain	Pld4	2.35469	NA	NA	NA	NA	NA	NA	NA	1	NA	NA	NA	NA	NA	NA	NA	1.12e-06	NA	NA	NA	NA	NA	NA	NA	NA	NA	NA	NA	NA	NA	NA	0.401467
Brain	Irgm2	1.95105	NA	NA	NA	NA	NA	NA	NA	1	NA	NA	NA	NA	NA	NA	NA	1.47e-06	NA	NA	NA	NA	NA	NA	NA	NA	NA	NA	NA	NA	NA	NA	0.395837
Brain	Nr6a1os	-202.06	7.0028	-0.78152	NA	NA	NA	NA	NA	0	0	-1	NA	NA	NA	NA	NA	0.176918	0.478406	0.0890055	NA	NA	NA	NA	NA	3.17935	8.90859	NA	NA	NA	NA	NA	0.390938
Brain	Exd2	-11.0004	NA	NA	NA	NA	NA	NA	NA	-1	NA	NA	NA	NA	NA	NA	NA	5.11e-05	NA	NA	NA	NA	NA	NA	NA	NA	NA	NA	NA	NA	NA	NA	0.390886
Brain	Apod	40.6729	NA	NA	NA	NA	NA	NA	NA	1	NA	NA	NA	NA	NA	NA	NA	1.98e-06	NA	NA	NA	NA	NA	NA	NA	NA	NA	NA	NA	NA	NA	NA	0.389668
Brain	Tyrobp	4.10327	NA	NA	NA	NA	NA	NA	NA	1	NA	NA	NA	NA	NA	NA	NA	1.74e-06	NA	NA	NA	NA	NA	NA	NA	NA	NA	NA	NA	NA	NA	NA	0.388775
Brain	Gm11860	204.56	-5.0039	0.025319	NA	NA	NA	NA	NA	1	0	0	NA	NA	NA	NA	NA	0.080971	0.46703	0.438441	NA	NA	NA	NA	NA	3.05744	6.21946	NA	NA	NA	NA	NA	0.387815
Brain	Tent5c	1.21859	NA	NA	NA	NA	NA	NA	NA	1	NA	NA	NA	NA	NA	NA	NA	1.49e-05	NA	NA	NA	NA	NA	NA	NA	NA	NA	NA	NA	NA	NA	NA	0.387161
Brain	Tapbp	5.94419	NA	NA	NA	NA	NA	NA	NA	1	NA	NA	NA	NA	NA	NA	NA	1.88e-06	NA	NA	NA	NA	NA	NA	NA	NA	NA	NA	NA	NA	NA	NA	0.386638
Brain	Rmnd1	-3.17421	NA	NA	NA	NA	NA	NA	NA	-1	NA	NA	NA	NA	NA	NA	NA	0.000127868	NA	NA	NA	NA	NA	NA	NA	NA	NA	NA	NA	NA	NA	NA	0.386327
Brain	Nrn1	-10.2234	NA	NA	NA	NA	NA	NA	NA	-1	NA	NA	NA	NA	NA	NA	NA	3.27e-06	NA	NA	NA	NA	NA	NA	NA	NA	NA	NA	NA	NA	NA	NA	0.384506
Brain	Il21r	0.757828	NA	NA	NA	NA	NA	NA	NA	1	NA	NA	NA	NA	NA	NA	NA	1.33e-05	NA	NA	NA	NA	NA	NA	NA	NA	NA	NA	NA	NA	NA	NA	0.384399
Brain	Sacs	-6.8289	NA	NA	NA	NA	NA	NA	NA	-1	NA	NA	NA	NA	NA	NA	NA	5.39e-06	NA	NA	NA	NA	NA	NA	NA	NA	NA	NA	NA	NA	NA	NA	0.382137
Brain	Cxcl10	0.594658	NA	NA	NA	NA	NA	NA	NA	1	NA	NA	NA	NA	NA	NA	NA	2.61e-06	NA	NA	NA	NA	NA	NA	NA	NA	NA	NA	NA	NA	NA	NA	0.382117
Brain	Sorbs3	5.14337	NA	NA	NA	NA	NA	NA	NA	1	NA	NA	NA	NA	NA	NA	NA	2.33e-06	NA	NA	NA	NA	NA	NA	NA	NA	NA	NA	NA	NA	NA	NA	0.38152
Brain	H2-DMb1	0.950747	NA	NA	NA	NA	NA	NA	NA	1	NA	NA	NA	NA	NA	NA	NA	3.89e-06	NA	NA	NA	NA	NA	NA	NA	NA	NA	NA	NA	NA	NA	NA	0.380971
Brain	Pcdhga2	3.19144	NA	NA	NA	NA	NA	NA	NA	1	NA	NA	NA	NA	NA	NA	NA	4.04e-06	NA	NA	NA	NA	NA	NA	NA	NA	NA	NA	NA	NA	NA	NA	0.380108
Brain	Decr2	-9.0338	3294.8	-153.31	6.2706	NA	NA	NA	NA	-1	0	0	0	NA	NA	NA	NA	0.0769917	0.120217	0.389181	0.211879	NA	NA	NA	NA	14.9862	15.1427	18.2949	NA	NA	NA	NA	0.379833
Brain	Cwc22	15.457	-14.707	5.1781	-2.563	NA	NA	NA	NA	1	-1	0	0	NA	NA	NA	NA	0.0823814	0.089334	0.159793	0.269595	NA	NA	NA	NA	6.99991	12.2584	20.9862	NA	NA	NA	NA	0.379626
Brain	Adam19	-223.14	7.2445	-6.36	NA	NA	NA	NA	NA	0	0	-1	NA	NA	NA	NA	NA	0.382254	0.118804	0.076098	NA	NA	NA	NA	NA	3.30514	13.6749	NA	NA	NA	NA	NA	0.378659
Brain	R3hdm1	-20.7481	NA	NA	NA	NA	NA	NA	NA	-1	NA	NA	NA	NA	NA	NA	NA	6.8e-05	NA	NA	NA	NA	NA	NA	NA	NA	NA	NA	NA	NA	NA	NA	0.378486
Brain	Tmem183a	-7.64432	NA	NA	NA	NA	NA	NA	NA	-1	NA	NA	NA	NA	NA	NA	NA	1.48e-05	NA	NA	NA	NA	NA	NA	NA	NA	NA	NA	NA	NA	NA	NA	0.378318
Brain	Pcdhb2	2.0144	-1.2603	NA	NA	NA	NA	NA	NA	1	0	NA	NA	NA	NA	NA	NA	0.0732889	0.210083	NA	NA	NA	NA	NA	NA	18.007	NA	NA	NA	NA	NA	NA	0.373753
Brain	Srebf1	15.0383	NA	NA	NA	NA	NA	NA	NA	1	NA	NA	NA	NA	NA	NA	NA	3.63e-06	NA	NA	NA	NA	NA	NA	NA	NA	NA	NA	NA	NA	NA	NA	0.373537
Brain	Tspan2	-123.01	5.2566	NA	NA	NA	NA	NA	NA	-1	0	NA	NA	NA	NA	NA	NA	0.0801863	0.243301	NA	NA	NA	NA	NA	NA	6.5204	NA	NA	NA	NA	NA	NA	0.373532
Brain	Slc2a4	1.13752	NA	NA	NA	NA	NA	NA	NA	1	NA	NA	NA	NA	NA	NA	NA	6e-05	NA	NA	NA	NA	NA	NA	NA	NA	NA	NA	NA	NA	NA	NA	0.371251
Brain	Rnf207	1.88523	NA	NA	NA	NA	NA	NA	NA	1	NA	NA	NA	NA	NA	NA	NA	3.6e-06	NA	NA	NA	NA	NA	NA	NA	NA	NA	NA	NA	NA	NA	NA	0.370624
Brain	Gsn	-29.324	24.005	NA	NA	NA	NA	NA	NA	0	1	NA	NA	NA	NA	NA	NA	0.131552	0.0641781	NA	NA	NA	NA	NA	NA	10.8002	NA	NA	NA	NA	NA	NA	0.370112
Brain	Crtam	25.87	-481.53	0.40918	NA	NA	NA	NA	NA	1	0	0	NA	NA	NA	NA	NA	0.0946804	0.452738	0.411613	NA	NA	NA	NA	NA	8.62485	8.98847	NA	NA	NA	NA	NA	0.369441
Brain	Galnt6	4.77473	NA	NA	NA	NA	NA	NA	NA	1	NA	NA	NA	NA	NA	NA	NA	3.56e-06	NA	NA	NA	NA	NA	NA	NA	NA	NA	NA	NA	NA	NA	NA	0.368635
Brain	Tlr2	1.32456	NA	NA	NA	NA	NA	NA	NA	1	NA	NA	NA	NA	NA	NA	NA	5.76e-06	NA	NA	NA	NA	NA	NA	NA	NA	NA	NA	NA	NA	NA	NA	0.367704
Brain	Gm28348	-0.156544	NA	NA	NA	NA	NA	NA	NA	-1	NA	NA	NA	NA	NA	NA	NA	0.0214602	NA	NA	NA	NA	NA	NA	NA	NA	NA	NA	NA	NA	NA	NA	0.367125
Brain	Xdh	39.502	-23.468	6.1935	NA	NA	NA	NA	NA	1	0	0	NA	NA	NA	NA	NA	0.073803	0.124828	0.124805	NA	NA	NA	NA	NA	7.06532	12.2506	NA	NA	NA	NA	NA	0.366871
Brain	Gm6631	0.42317	-64.011	1.4328	-103.23	0.97754	NA	NA	NA	0	0	1	0	0	NA	NA	NA	0.140685	0.199362	0.0673678	0.248086	0.171413	NA	NA	NA	11.9736	12.1201	20.9807	21.0916	NA	NA	NA	0.366832
Brain	Ifi27l2a	0.92135	NA	NA	NA	NA	NA	NA	NA	1	NA	NA	NA	NA	NA	NA	NA	6.76e-06	NA	NA	NA	NA	NA	NA	NA	NA	NA	NA	NA	NA	NA	NA	0.366414
Brain	Akap17b	-0.975276	NA	NA	NA	NA	NA	NA	NA	-1	NA	NA	NA	NA	NA	NA	NA	0.0201872	NA	NA	NA	NA	NA	NA	NA	NA	NA	NA	NA	NA	NA	NA	0.366369
Brain	Olfr1141	1.7299	-5.2872	0.11401	NA	NA	NA	NA	NA	1	0	0	NA	NA	NA	NA	NA	0.0736454	0.470428	0.343448	NA	NA	NA	NA	NA	9.92292	12.262	NA	NA	NA	NA	NA	0.363385
Brain	Pcdhga6	2.42362	NA	NA	NA	NA	NA	NA	NA	1	NA	NA	NA	NA	NA	NA	NA	4.75e-06	NA	NA	NA	NA	NA	NA	NA	NA	NA	NA	NA	NA	NA	NA	0.361968
Brain	Msn	5.99248	NA	NA	NA	NA	NA	NA	NA	1	NA	NA	NA	NA	NA	NA	NA	9.19e-06	NA	NA	NA	NA	NA	NA	NA	NA	NA	NA	NA	NA	NA	NA	0.361332
Brain	Thbs1	1.51663	NA	NA	NA	NA	NA	NA	NA	1	NA	NA	NA	NA	NA	NA	NA	2.8e-05	NA	NA	NA	NA	NA	NA	NA	NA	NA	NA	NA	NA	NA	NA	0.36102
Brain	Aldh1a2	4.19095	NA	NA	NA	NA	NA	NA	NA	1	NA	NA	NA	NA	NA	NA	NA	8.93e-06	NA	NA	NA	NA	NA	NA	NA	NA	NA	NA	NA	NA	NA	NA	0.359969
Brain	Tmc6	-0.16661	4.9118	NA	NA	NA	NA	NA	NA	0	1	NA	NA	NA	NA	NA	NA	0.436418	0.0865448	NA	NA	NA	NA	NA	NA	16.7603	NA	NA	NA	NA	NA	NA	0.358864
Brain	Amz1	3.047	-20.492	9.9603	NA	NA	NA	NA	NA	0	0	1	NA	NA	NA	NA	NA	0.113022	0.476424	0.0960641	NA	NA	NA	NA	NA	16.0915	18.6109	NA	NA	NA	NA	NA	0.3585
Brain	Xaf1	1.32541	NA	NA	NA	NA	NA	NA	NA	1	NA	NA	NA	NA	NA	NA	NA	5.37e-06	NA	NA	NA	NA	NA	NA	NA	NA	NA	NA	NA	NA	NA	NA	0.357962
Brain	C030029H02Rik	1.73419	NA	NA	NA	NA	NA	NA	NA	1	NA	NA	NA	NA	NA	NA	NA	1.28e-05	NA	NA	NA	NA	NA	NA	NA	NA	NA	NA	NA	NA	NA	NA	0.356569
Brain	Tcirg1	3.77707	NA	NA	NA	NA	NA	NA	NA	1	NA	NA	NA	NA	NA	NA	NA	3.32e-05	NA	NA	NA	NA	NA	NA	NA	NA	NA	NA	NA	NA	NA	NA	0.356012
Brain	Stxbp3	3.4737	NA	NA	NA	NA	NA	NA	NA	1	NA	NA	NA	NA	NA	NA	NA	5.7e-05	NA	NA	NA	NA	NA	NA	NA	NA	NA	NA	NA	NA	NA	NA	0.35576
Brain	Krt9	0.348711	NA	NA	NA	NA	NA	NA	NA	1	NA	NA	NA	NA	NA	NA	NA	8.43e-06	NA	NA	NA	NA	NA	NA	NA	NA	NA	NA	NA	NA	NA	NA	0.35512
Brain	Dhx40	-4.1458	2.6878	NA	NA	NA	NA	NA	NA	-1	0	NA	NA	NA	NA	NA	NA	0.0830073	0.190762	NA	NA	NA	NA	NA	NA	16.8937	NA	NA	NA	NA	NA	NA	0.354966
Brain	Mob1b	-3.27649	NA	NA	NA	NA	NA	NA	NA	-1	NA	NA	NA	NA	NA	NA	NA	2.11e-05	NA	NA	NA	NA	NA	NA	NA	NA	NA	NA	NA	NA	NA	NA	0.353874
Brain	Aldh1a1	-8.97954	NA	NA	NA	NA	NA	NA	NA	-1	NA	NA	NA	NA	NA	NA	NA	0.000473671	NA	NA	NA	NA	NA	NA	NA	NA	NA	NA	NA	NA	NA	NA	0.353666
Brain	Gstm2	1.04347	NA	NA	NA	NA	NA	NA	NA	1	NA	NA	NA	NA	NA	NA	NA	7.25e-06	NA	NA	NA	NA	NA	NA	NA	NA	NA	NA	NA	NA	NA	NA	0.353417
Brain	Eva1c	1.08341	NA	NA	NA	NA	NA	NA	NA	1	NA	NA	NA	NA	NA	NA	NA	6.09e-06	NA	NA	NA	NA	NA	NA	NA	NA	NA	NA	NA	NA	NA	NA	0.353371
Brain	Cst7	1.26774	NA	NA	NA	NA	NA	NA	NA	1	NA	NA	NA	NA	NA	NA	NA	6.31e-06	NA	NA	NA	NA	NA	NA	NA	NA	NA	NA	NA	NA	NA	NA	0.352125
Brain	Camk4	-28.3719	NA	NA	NA	NA	NA	NA	NA	-1	NA	NA	NA	NA	NA	NA	NA	1.1e-05	NA	NA	NA	NA	NA	NA	NA	NA	NA	NA	NA	NA	NA	NA	0.351937
Brain	Zfp322a	-4.22216	NA	NA	NA	NA	NA	NA	NA	-1	NA	NA	NA	NA	NA	NA	NA	9.04e-06	NA	NA	NA	NA	NA	NA	NA	NA	NA	NA	NA	NA	NA	NA	0.351729
Brain	Cd74	4.69779	NA	NA	NA	NA	NA	NA	NA	1	NA	NA	NA	NA	NA	NA	NA	8.35e-06	NA	NA	NA	NA	NA	NA	NA	NA	NA	NA	NA	NA	NA	NA	0.351568
Brain	Mical2	-30.5763	NA	NA	NA	NA	NA	NA	NA	-1	NA	NA	NA	NA	NA	NA	NA	2.21e-05	NA	NA	NA	NA	NA	NA	NA	NA	NA	NA	NA	NA	NA	NA	0.350393
Brain	Dclk1	-57.3913	NA	NA	NA	NA	NA	NA	NA	-1	NA	NA	NA	NA	NA	NA	NA	2.16e-05	NA	NA	NA	NA	NA	NA	NA	NA	NA	NA	NA	NA	NA	NA	0.349603
Brain	Gm20873	-0.141826	NA	NA	NA	NA	NA	NA	NA	-1	NA	NA	NA	NA	NA	NA	NA	0.0184154	NA	NA	NA	NA	NA	NA	NA	NA	NA	NA	NA	NA	NA	NA	0.349472
Brain	Gm29392	-0.157426	NA	NA	NA	NA	NA	NA	NA	-1	NA	NA	NA	NA	NA	NA	NA	0.00733267	NA	NA	NA	NA	NA	NA	NA	NA	NA	NA	NA	NA	NA	NA	0.349339
Brain	Plcg2	1.68915	NA	NA	NA	NA	NA	NA	NA	1	NA	NA	NA	NA	NA	NA	NA	1.61e-05	NA	NA	NA	NA	NA	NA	NA	NA	NA	NA	NA	NA	NA	NA	0.34904
Brain	Lypd1	-3.82709	NA	NA	NA	NA	NA	NA	NA	-1	NA	NA	NA	NA	NA	NA	NA	2.24e-05	NA	NA	NA	NA	NA	NA	NA	NA	NA	NA	NA	NA	NA	NA	0.347794
Brain	Olfr1409-ps1	0.93239	-0.94264	9.1118	-1.2629	NA	NA	NA	NA	1	0	0	-1	NA	NA	NA	NA	0.0954771	0.174606	0.409166	0.0857688	NA	NA	NA	NA	9.22563	17.58	18.864	NA	NA	NA	NA	0.347432
Brain	Gm28875	1.54266	NA	NA	NA	NA	NA	NA	NA	1	NA	NA	NA	NA	NA	NA	NA	2.12e-05	NA	NA	NA	NA	NA	NA	NA	NA	NA	NA	NA	NA	NA	NA	0.346643
Brain	Sorbs2	-13.2164	NA	NA	NA	NA	NA	NA	NA	-1	NA	NA	NA	NA	NA	NA	NA	0.000280608	NA	NA	NA	NA	NA	NA	NA	NA	NA	NA	NA	NA	NA	NA	0.344887
Brain	Csf3r	1.62813	NA	NA	NA	NA	NA	NA	NA	1	NA	NA	NA	NA	NA	NA	NA	1.75e-05	NA	NA	NA	NA	NA	NA	NA	NA	NA	NA	NA	NA	NA	NA	0.344818
Brain	Sspn	2.90077	NA	NA	NA	NA	NA	NA	NA	1	NA	NA	NA	NA	NA	NA	NA	9.27e-06	NA	NA	NA	NA	NA	NA	NA	NA	NA	NA	NA	NA	NA	NA	0.344087
Brain	Wee1	-4.22575	NA	NA	NA	NA	NA	NA	NA	-1	NA	NA	NA	NA	NA	NA	NA	1.83e-05	NA	NA	NA	NA	NA	NA	NA	NA	NA	NA	NA	NA	NA	NA	0.34111
Brain	Rasal3	1.81514	NA	NA	NA	NA	NA	NA	NA	1	NA	NA	NA	NA	NA	NA	NA	9.53e-06	NA	NA	NA	NA	NA	NA	NA	NA	NA	NA	NA	NA	NA	NA	0.340378
Brain	Axl	-10.064	11.113	NA	NA	NA	NA	NA	NA	0	1	NA	NA	NA	NA	NA	NA	0.242253	0.069031	NA	NA	NA	NA	NA	NA	8.96018	NA	NA	NA	NA	NA	NA	0.340175
Brain	Ntn5	1.34356	NA	NA	NA	NA	NA	NA	NA	1	NA	NA	NA	NA	NA	NA	NA	1.22e-05	NA	NA	NA	NA	NA	NA	NA	NA	NA	NA	NA	NA	NA	NA	0.340165
Brain	Klc3	0.777096	NA	NA	NA	NA	NA	NA	NA	1	NA	NA	NA	NA	NA	NA	NA	3.26e-05	NA	NA	NA	NA	NA	NA	NA	NA	NA	NA	NA	NA	NA	NA	0.338304
Brain	Litaf	6.19835	NA	NA	NA	NA	NA	NA	NA	1	NA	NA	NA	NA	NA	NA	NA	1.11e-05	NA	NA	NA	NA	NA	NA	NA	NA	NA	NA	NA	NA	NA	NA	0.336197
Brain	Grin2a	-17.3721	NA	NA	NA	NA	NA	NA	NA	-1	NA	NA	NA	NA	NA	NA	NA	0.000209878	NA	NA	NA	NA	NA	NA	NA	NA	NA	NA	NA	NA	NA	NA	0.335305
Brain	Itgb4	3.52215	NA	NA	NA	NA	NA	NA	NA	1	NA	NA	NA	NA	NA	NA	NA	1.33e-05	NA	NA	NA	NA	NA	NA	NA	NA	NA	NA	NA	NA	NA	NA	0.335265
Brain	Wfikkn2	0.887405	NA	NA	NA	NA	NA	NA	NA	1	NA	NA	NA	NA	NA	NA	NA	0.000157959	NA	NA	NA	NA	NA	NA	NA	NA	NA	NA	NA	NA	NA	NA	0.335215
Brain	Arhgap45	1.58936	NA	NA	NA	NA	NA	NA	NA	1	NA	NA	NA	NA	NA	NA	NA	8.52e-05	NA	NA	NA	NA	NA	NA	NA	NA	NA	NA	NA	NA	NA	NA	0.334192
Brain	Pls1	4.07027	NA	NA	NA	NA	NA	NA	NA	1	NA	NA	NA	NA	NA	NA	NA	1.48e-05	NA	NA	NA	NA	NA	NA	NA	NA	NA	NA	NA	NA	NA	NA	0.333854
Brain	Camkk2	-18.1053	NA	NA	NA	NA	NA	NA	NA	-1	NA	NA	NA	NA	NA	NA	NA	2.95e-05	NA	NA	NA	NA	NA	NA	NA	NA	NA	NA	NA	NA	NA	NA	0.333514
Brain	Plcd1	-1.5083	3.9684	NA	NA	NA	NA	NA	NA	0	1	NA	NA	NA	NA	NA	NA	0.241588	0.0963038	NA	NA	NA	NA	NA	NA	13.1994	NA	NA	NA	NA	NA	NA	0.333384
Brain	Tex52	0.904075	NA	NA	NA	NA	NA	NA	NA	1	NA	NA	NA	NA	NA	NA	NA	1.29e-05	NA	NA	NA	NA	NA	NA	NA	NA	NA	NA	NA	NA	NA	NA	0.333191
Brain	Sphk1	1.79459	NA	NA	NA	NA	NA	NA	NA	1	NA	NA	NA	NA	NA	NA	NA	2.69e-05	NA	NA	NA	NA	NA	NA	NA	NA	NA	NA	NA	NA	NA	NA	0.333177
Brain	Trim59	4.30539	NA	NA	NA	NA	NA	NA	NA	1	NA	NA	NA	NA	NA	NA	NA	1.45e-05	NA	NA	NA	NA	NA	NA	NA	NA	NA	NA	NA	NA	NA	NA	0.331035
Brain	Lig1	1.43875	NA	NA	NA	NA	NA	NA	NA	1	NA	NA	NA	NA	NA	NA	NA	0.000368652	NA	NA	NA	NA	NA	NA	NA	NA	NA	NA	NA	NA	NA	NA	0.330752
Brain	Zfp410	-2.53402	NA	NA	NA	NA	NA	NA	NA	-1	NA	NA	NA	NA	NA	NA	NA	7.52e-05	NA	NA	NA	NA	NA	NA	NA	NA	NA	NA	NA	NA	NA	NA	0.330736
Brain	Irf8	1.92245	NA	NA	NA	NA	NA	NA	NA	1	NA	NA	NA	NA	NA	NA	NA	1.81e-05	NA	NA	NA	NA	NA	NA	NA	NA	NA	NA	NA	NA	NA	NA	0.330643
Brain	Efnb3	16.9434	NA	NA	NA	NA	NA	NA	NA	1	NA	NA	NA	NA	NA	NA	NA	1.61e-05	NA	NA	NA	NA	NA	NA	NA	NA	NA	NA	NA	NA	NA	NA	0.329648
Brain	Smap1	-16.923	0.66941	NA	NA	NA	NA	NA	NA	-1	0	NA	NA	NA	NA	NA	NA	0.0904812	0.391463	NA	NA	NA	NA	NA	NA	9.38112	NA	NA	NA	NA	NA	NA	0.329603
Brain	Olfr1160	1.6487	-138.32	114.34	-4.8906	NA	NA	NA	NA	0	0	0	-1	NA	NA	NA	NA	0.12369	0.292389	0.314449	0.0870852	NA	NA	NA	NA	14.8006	16.323	18.2374	NA	NA	NA	NA	0.329105
Brain	Parp9	1.36034	NA	NA	NA	NA	NA	NA	NA	1	NA	NA	NA	NA	NA	NA	NA	2.28e-05	NA	NA	NA	NA	NA	NA	NA	NA	NA	NA	NA	NA	NA	NA	0.328856
Brain	Bche	-0.12139	9.4146	-7.0995	NA	NA	NA	NA	NA	0	1	0	NA	NA	NA	NA	NA	0.439328	0.0941989	0.148461	NA	NA	NA	NA	NA	17.449	21.6049	NA	NA	NA	NA	NA	0.328652
Brain	Obox3-ps7	0.496865	NA	NA	NA	NA	NA	NA	NA	1	NA	NA	NA	NA	NA	NA	NA	2.17e-05	NA	NA	NA	NA	NA	NA	NA	NA	NA	NA	NA	NA	NA	NA	0.327928
Brain	Gm37962	4.7294	-5.4366	0.79973	NA	NA	NA	NA	NA	1	0	0	NA	NA	NA	NA	NA	0.0922595	0.485185	0.108327	NA	NA	NA	NA	NA	7.72692	11.5632	NA	NA	NA	NA	NA	0.327918
Brain	Cbln2	-9.43797	NA	NA	NA	NA	NA	NA	NA	-1	NA	NA	NA	NA	NA	NA	NA	2.18e-05	NA	NA	NA	NA	NA	NA	NA	NA	NA	NA	NA	NA	NA	NA	0.325165
Brain	Cldn11	-196.38	24.905	NA	NA	NA	NA	NA	NA	-1	0	NA	NA	NA	NA	NA	NA	0.0913607	0.113431	NA	NA	NA	NA	NA	NA	7.12291	NA	NA	NA	NA	NA	NA	0.324787
Brain	Frmpd4	-2.32278	NA	NA	NA	NA	NA	NA	NA	-1	NA	NA	NA	NA	NA	NA	NA	0.0756025	NA	NA	NA	NA	NA	NA	NA	NA	NA	NA	NA	NA	NA	NA	0.324537
Brain	Gm20906	-0.115671	NA	NA	NA	NA	NA	NA	NA	-1	NA	NA	NA	NA	NA	NA	NA	0.0412763	NA	NA	NA	NA	NA	NA	NA	NA	NA	NA	NA	NA	NA	NA	0.324435
Brain	Unc93b1	4.25846	NA	NA	NA	NA	NA	NA	NA	1	NA	NA	NA	NA	NA	NA	NA	1.66e-05	NA	NA	NA	NA	NA	NA	NA	NA	NA	NA	NA	NA	NA	NA	0.324181
Brain	Gm10545	2.4403	-272.51	-0.20762	NA	NA	NA	NA	NA	1	0	0	NA	NA	NA	NA	NA	0.0730823	0.443953	0.275893	NA	NA	NA	NA	NA	11.9261	11.9906	NA	NA	NA	NA	NA	0.324048
Brain	Slco1c1	-4.36097	NA	NA	NA	NA	NA	NA	NA	-1	NA	NA	NA	NA	NA	NA	NA	1.71e-05	NA	NA	NA	NA	NA	NA	NA	NA	NA	NA	NA	NA	NA	NA	0.322775
Brain	Gm11681	0.35488	NA	NA	NA	NA	NA	NA	NA	1	NA	NA	NA	NA	NA	NA	NA	3.57e-05	NA	NA	NA	NA	NA	NA	NA	NA	NA	NA	NA	NA	NA	NA	0.320742
Brain	Car4	-5.38892	NA	NA	NA	NA	NA	NA	NA	-1	NA	NA	NA	NA	NA	NA	NA	4.26e-05	NA	NA	NA	NA	NA	NA	NA	NA	NA	NA	NA	NA	NA	NA	0.319499
Brain	Khdrbs3	-3.88974	NA	NA	NA	NA	NA	NA	NA	-1	NA	NA	NA	NA	NA	NA	NA	2.9e-05	NA	NA	NA	NA	NA	NA	NA	NA	NA	NA	NA	NA	NA	NA	0.319377
Brain	S1pr3	2.52458	NA	NA	NA	NA	NA	NA	NA	1	NA	NA	NA	NA	NA	NA	NA	5.99e-05	NA	NA	NA	NA	NA	NA	NA	NA	NA	NA	NA	NA	NA	NA	0.319234
Brain	Bdkrb2	1.12936	NA	NA	NA	NA	NA	NA	NA	1	NA	NA	NA	NA	NA	NA	NA	1.95e-05	NA	NA	NA	NA	NA	NA	NA	NA	NA	NA	NA	NA	NA	NA	0.318898
Brain	H2-M3	1.126	NA	NA	NA	NA	NA	NA	NA	1	NA	NA	NA	NA	NA	NA	NA	2.48e-05	NA	NA	NA	NA	NA	NA	NA	NA	NA	NA	NA	NA	NA	NA	0.31747
Brain	C2	0.652233	NA	NA	NA	NA	NA	NA	NA	1	NA	NA	NA	NA	NA	NA	NA	0.000167259	NA	NA	NA	NA	NA	NA	NA	NA	NA	NA	NA	NA	NA	NA	0.317356
Brain	Qprt	0.7923	-449.55	NA	NA	NA	NA	NA	NA	1	0	NA	NA	NA	NA	NA	NA	0.069705	0.139735	NA	NA	NA	NA	NA	NA	26.9792	NA	NA	NA	NA	NA	NA	0.317122
Brain	Tunar	-2.60527	NA	NA	NA	NA	NA	NA	NA	-1	NA	NA	NA	NA	NA	NA	NA	2.06e-05	NA	NA	NA	NA	NA	NA	NA	NA	NA	NA	NA	NA	NA	NA	0.31693
Brain	Gdap1	-10.386	1676.2	NA	NA	NA	NA	NA	NA	-1	0	NA	NA	NA	NA	NA	NA	0.0641067	0.33805	NA	NA	NA	NA	NA	NA	26.9309	NA	NA	NA	NA	NA	NA	0.316425
Brain	Tspo	2.11167	NA	NA	NA	NA	NA	NA	NA	1	NA	NA	NA	NA	NA	NA	NA	3.35e-05	NA	NA	NA	NA	NA	NA	NA	NA	NA	NA	NA	NA	NA	NA	0.315592
Brain	Kcnk2	-5.4162	7.5226	NA	NA	NA	NA	NA	NA	-1	0	NA	NA	NA	NA	NA	NA	0.06799	0.16788	NA	NA	NA	NA	NA	NA	18.6063	NA	NA	NA	NA	NA	NA	0.315436
Brain	Pisd-ps1	6.19711	NA	NA	NA	NA	NA	NA	NA	1	NA	NA	NA	NA	NA	NA	NA	3.56e-05	NA	NA	NA	NA	NA	NA	NA	NA	NA	NA	NA	NA	NA	NA	0.315094
Brain	Pcdhga4	2.20645	NA	NA	NA	NA	NA	NA	NA	1	NA	NA	NA	NA	NA	NA	NA	2.94e-05	NA	NA	NA	NA	NA	NA	NA	NA	NA	NA	NA	NA	NA	NA	0.314958
Brain	Gm12876	0.85843	-1129.8	47.087	-0.54989	NA	NA	NA	NA	1	0	0	0	NA	NA	NA	NA	0.0950069	0.132191	0.27187	0.147152	NA	NA	NA	NA	12.0403	12.1658	15.1189	NA	NA	NA	NA	0.31466
Brain	Mpeg1	1.19768	NA	NA	NA	NA	NA	NA	NA	1	NA	NA	NA	NA	NA	NA	NA	2.53e-05	NA	NA	NA	NA	NA	NA	NA	NA	NA	NA	NA	NA	NA	NA	0.314503
Brain	Tenm1	-6.0142	NA	NA	NA	NA	NA	NA	NA	-1	NA	NA	NA	NA	NA	NA	NA	0.000280292	NA	NA	NA	NA	NA	NA	NA	NA	NA	NA	NA	NA	NA	NA	0.313998
Brain	Pon2	-13.284	7.7843	NA	NA	NA	NA	NA	NA	0	1	NA	NA	NA	NA	NA	NA	0.12029	0.080319	NA	NA	NA	NA	NA	NA	11.2548	NA	NA	NA	NA	NA	NA	0.31375
Brain	Cd37	0.974587	NA	NA	NA	NA	NA	NA	NA	1	NA	NA	NA	NA	NA	NA	NA	3.09e-05	NA	NA	NA	NA	NA	NA	NA	NA	NA	NA	NA	NA	NA	NA	0.313182
Brain	Alpl	2.69208	NA	NA	NA	NA	NA	NA	NA	1	NA	NA	NA	NA	NA	NA	NA	2.49e-05	NA	NA	NA	NA	NA	NA	NA	NA	NA	NA	NA	NA	NA	NA	0.313119
Brain	Taf7	-1.2998	1083.7	-8.7566	NA	NA	NA	NA	NA	0	0	-1	NA	NA	NA	NA	NA	0.165273	0.193521	0.0731846	NA	NA	NA	NA	NA	18.0005	18.0535	NA	NA	NA	NA	NA	0.313062
Brain	Adamtsl4	5.04404	NA	NA	NA	NA	NA	NA	NA	1	NA	NA	NA	NA	NA	NA	NA	2.42e-05	NA	NA	NA	NA	NA	NA	NA	NA	NA	NA	NA	NA	NA	NA	0.312745
Brain	Gm42756	1.83902	NA	NA	NA	NA	NA	NA	NA	1	NA	NA	NA	NA	NA	NA	NA	0.000154202	NA	NA	NA	NA	NA	NA	NA	NA	NA	NA	NA	NA	NA	NA	0.312509
Brain	Stk10	-181.11	1.796	NA	NA	NA	NA	NA	NA	0	1	NA	NA	NA	NA	NA	NA	0.291636	0.0683437	NA	NA	NA	NA	NA	NA	3.14442	NA	NA	NA	NA	NA	NA	0.311411
Brain	Psmb9	-0.064735	2.2365	NA	NA	NA	NA	NA	NA	0	1	NA	NA	NA	NA	NA	NA	0.452924	0.0995245	NA	NA	NA	NA	NA	NA	16.3651	NA	NA	NA	NA	NA	NA	0.310448
Brain	Smoc1	2.67336	NA	NA	NA	NA	NA	NA	NA	1	NA	NA	NA	NA	NA	NA	NA	7.07e-05	NA	NA	NA	NA	NA	NA	NA	NA	NA	NA	NA	NA	NA	NA	0.310159
Brain	Fut9	-12.0507	NA	NA	NA	NA	NA	NA	NA	-1	NA	NA	NA	NA	NA	NA	NA	9.03e-05	NA	NA	NA	NA	NA	NA	NA	NA	NA	NA	NA	NA	NA	NA	0.309657
Brain	Dcakd	-5.67969	NA	NA	NA	NA	NA	NA	NA	-1	NA	NA	NA	NA	NA	NA	NA	2.75e-05	NA	NA	NA	NA	NA	NA	NA	NA	NA	NA	NA	NA	NA	NA	0.308783
Brain	Gm11257	-0.16173	1.3474	-1.8256	NA	NA	NA	NA	NA	0	1	0	NA	NA	NA	NA	NA	0.264993	0.0944377	0.141005	NA	NA	NA	NA	NA	14.953	21.2811	NA	NA	NA	NA	NA	0.3085
Brain	Itm2a	-32.891	6.9314	NA	NA	NA	NA	NA	NA	-1	0	NA	NA	NA	NA	NA	NA	0.0971013	0.116834	NA	NA	NA	NA	NA	NA	8.94706	NA	NA	NA	NA	NA	NA	0.308463
Brain	H2-Q5	0.569257	NA	NA	NA	NA	NA	NA	NA	1	NA	NA	NA	NA	NA	NA	NA	2.78e-05	NA	NA	NA	NA	NA	NA	NA	NA	NA	NA	NA	NA	NA	NA	0.30784
Brain	Fcgr1	0.64294	NA	NA	NA	NA	NA	NA	NA	1	NA	NA	NA	NA	NA	NA	NA	2.95e-05	NA	NA	NA	NA	NA	NA	NA	NA	NA	NA	NA	NA	NA	NA	0.307639
Brain	Slc44a2	1.7811	30.137	NA	NA	NA	NA	NA	NA	0	1	NA	NA	NA	NA	NA	NA	0.306201	0.0971415	NA	NA	NA	NA	NA	NA	20.8661	NA	NA	NA	NA	NA	NA	0.307165
Brain	Tmem33	-6.94098	NA	NA	NA	NA	NA	NA	NA	-1	NA	NA	NA	NA	NA	NA	NA	4.77e-05	NA	NA	NA	NA	NA	NA	NA	NA	NA	NA	NA	NA	NA	NA	0.306468
Brain	Pcdhb4	1.32319	NA	NA	NA	NA	NA	NA	NA	1	NA	NA	NA	NA	NA	NA	NA	3.63e-05	NA	NA	NA	NA	NA	NA	NA	NA	NA	NA	NA	NA	NA	NA	0.306278
Brain	Ptgis	0.99149	NA	NA	NA	NA	NA	NA	NA	1	NA	NA	NA	NA	NA	NA	NA	2.95e-05	NA	NA	NA	NA	NA	NA	NA	NA	NA	NA	NA	NA	NA	NA	0.305875
Brain	Avp	5.1712	NA	NA	NA	NA	NA	NA	NA	1	NA	NA	NA	NA	NA	NA	NA	0.000105015	NA	NA	NA	NA	NA	NA	NA	NA	NA	NA	NA	NA	NA	NA	0.305844
Brain	Padi2	6.86433	NA	NA	NA	NA	NA	NA	NA	1	NA	NA	NA	NA	NA	NA	NA	2.98e-05	NA	NA	NA	NA	NA	NA	NA	NA	NA	NA	NA	NA	NA	NA	0.305825
Brain	Fcgr2b	1.8128	NA	NA	NA	NA	NA	NA	NA	1	NA	NA	NA	NA	NA	NA	NA	3.64e-05	NA	NA	NA	NA	NA	NA	NA	NA	NA	NA	NA	NA	NA	NA	0.305646
Brain	Tor3a	2.36799	NA	NA	NA	NA	NA	NA	NA	1	NA	NA	NA	NA	NA	NA	NA	3.02e-05	NA	NA	NA	NA	NA	NA	NA	NA	NA	NA	NA	NA	NA	NA	0.30528
Brain	Cyth4	2.54959	NA	NA	NA	NA	NA	NA	NA	1	NA	NA	NA	NA	NA	NA	NA	6.16e-05	NA	NA	NA	NA	NA	NA	NA	NA	NA	NA	NA	NA	NA	NA	0.304798
Brain	Tmem176a	2.49749	NA	NA	NA	NA	NA	NA	NA	1	NA	NA	NA	NA	NA	NA	NA	4.41e-05	NA	NA	NA	NA	NA	NA	NA	NA	NA	NA	NA	NA	NA	NA	0.304729
Brain	Rgs5	-6.76448	NA	NA	NA	NA	NA	NA	NA	-1	NA	NA	NA	NA	NA	NA	NA	0.000551898	NA	NA	NA	NA	NA	NA	NA	NA	NA	NA	NA	NA	NA	NA	0.303956
Brain	Rnf113a2	341.03	-11.399	0.25655	NA	NA	NA	NA	NA	0	-1	0	NA	NA	NA	NA	NA	0.362494	0.085961	0.372647	NA	NA	NA	NA	NA	3.15799	9.18408	NA	NA	NA	NA	NA	0.303767
Brain	Cxcl16	1.12037	NA	NA	NA	NA	NA	NA	NA	1	NA	NA	NA	NA	NA	NA	NA	4.29e-05	NA	NA	NA	NA	NA	NA	NA	NA	NA	NA	NA	NA	NA	NA	0.303012
Brain	Hsph1	-45.0697	NA	NA	NA	NA	NA	NA	NA	-1	NA	NA	NA	NA	NA	NA	NA	3.95e-05	NA	NA	NA	NA	NA	NA	NA	NA	NA	NA	NA	NA	NA	NA	0.302711
Brain	Pdlim1	1.36659	NA	NA	NA	NA	NA	NA	NA	1	NA	NA	NA	NA	NA	NA	NA	0.000101982	NA	NA	NA	NA	NA	NA	NA	NA	NA	NA	NA	NA	NA	NA	0.302209
Brain	Anxa4	1.70717	NA	NA	NA	NA	NA	NA	NA	1	NA	NA	NA	NA	NA	NA	NA	3.33e-05	NA	NA	NA	NA	NA	NA	NA	NA	NA	NA	NA	NA	NA	NA	0.301989
Brain	Trf	34.873	NA	NA	NA	NA	NA	NA	NA	1	NA	NA	NA	NA	NA	NA	NA	3.84e-05	NA	NA	NA	NA	NA	NA	NA	NA	NA	NA	NA	NA	NA	NA	0.301671
Brain	Spg20	6.83903	NA	NA	NA	NA	NA	NA	NA	1	NA	NA	NA	NA	NA	NA	NA	4.1e-05	NA	NA	NA	NA	NA	NA	NA	NA	NA	NA	NA	NA	NA	NA	0.300459
Brain	Anxa3	2.56825	NA	NA	NA	NA	NA	NA	NA	1	NA	NA	NA	NA	NA	NA	NA	4.35e-05	NA	NA	NA	NA	NA	NA	NA	NA	NA	NA	NA	NA	NA	NA	0.30035
Brain	Dhx58	0.974056	NA	NA	NA	NA	NA	NA	NA	1	NA	NA	NA	NA	NA	NA	NA	3.53e-05	NA	NA	NA	NA	NA	NA	NA	NA	NA	NA	NA	NA	NA	NA	0.300184
Brain	Itga10	1.5852	-0.84027	NA	NA	NA	NA	NA	NA	0	-1	NA	NA	NA	NA	NA	NA	0.121856	0.0898028	NA	NA	NA	NA	NA	NA	11.8375	NA	NA	NA	NA	NA	NA	0.299494
Brain	Sec14l3	-0.4783	100.87	-29.241	NA	NA	NA	NA	NA	0	0	-1	NA	NA	NA	NA	NA	0.379145	0.466168	0.0975658	NA	NA	NA	NA	NA	20.7278	22.218	NA	NA	NA	NA	NA	0.299426
Brain	Drp2	-2.65454	NA	NA	NA	NA	NA	NA	NA	-1	NA	NA	NA	NA	NA	NA	NA	0.00754353	NA	NA	NA	NA	NA	NA	NA	NA	NA	NA	NA	NA	NA	NA	0.299045
Brain	Vmp1	-9.5966	NA	NA	NA	NA	NA	NA	NA	-1	NA	NA	NA	NA	NA	NA	NA	0.000111364	NA	NA	NA	NA	NA	NA	NA	NA	NA	NA	NA	NA	NA	NA	0.298801
Brain	1110002L01Rik	-0.969428	NA	NA	NA	NA	NA	NA	NA	-1	NA	NA	NA	NA	NA	NA	NA	3.77e-05	NA	NA	NA	NA	NA	NA	NA	NA	NA	NA	NA	NA	NA	NA	0.298579
Brain	Jcad	-6.73136	NA	NA	NA	NA	NA	NA	NA	-1	NA	NA	NA	NA	NA	NA	NA	0.0024112	NA	NA	NA	NA	NA	NA	NA	NA	NA	NA	NA	NA	NA	NA	0.297393
Brain	AB124611	0.40078	-1086.3	NA	NA	NA	NA	NA	NA	1	0	NA	NA	NA	NA	NA	NA	0.0846399	0.170489	NA	NA	NA	NA	NA	NA	26.9681	NA	NA	NA	NA	NA	NA	0.296888
Brain	Gm17148	-123.47	0.97919	-0.30912	NA	NA	NA	NA	NA	0	1	0	NA	NA	NA	NA	NA	0.106389	0.0947434	0.139203	NA	NA	NA	NA	NA	3.08229	12.0119	NA	NA	NA	NA	NA	0.296256
Brain	Dgkb	-9.02316	NA	NA	NA	NA	NA	NA	NA	-1	NA	NA	NA	NA	NA	NA	NA	0.000955029	NA	NA	NA	NA	NA	NA	NA	NA	NA	NA	NA	NA	NA	NA	0.296121
Brain	Gm20915	-0.220921	NA	NA	NA	NA	NA	NA	NA	-1	NA	NA	NA	NA	NA	NA	NA	0.0195558	NA	NA	NA	NA	NA	NA	NA	NA	NA	NA	NA	NA	NA	NA	0.295956
Brain	Nrep	-28.0119	NA	NA	NA	NA	NA	NA	NA	-1	NA	NA	NA	NA	NA	NA	NA	4.23e-05	NA	NA	NA	NA	NA	NA	NA	NA	NA	NA	NA	NA	NA	NA	0.295407
Brain	Tgfbi	1.80803	NA	NA	NA	NA	NA	NA	NA	1	NA	NA	NA	NA	NA	NA	NA	4.16e-05	NA	NA	NA	NA	NA	NA	NA	NA	NA	NA	NA	NA	NA	NA	0.295038
Brain	Arhgap20	-5.60812	NA	NA	NA	NA	NA	NA	NA	-1	NA	NA	NA	NA	NA	NA	NA	0.00149846	NA	NA	NA	NA	NA	NA	NA	NA	NA	NA	NA	NA	NA	NA	0.294523
Brain	Mms19	-2.0628	7.9502	NA	NA	NA	NA	NA	NA	0	1	NA	NA	NA	NA	NA	NA	0.279398	0.0844294	NA	NA	NA	NA	NA	NA	14.2287	NA	NA	NA	NA	NA	NA	0.294416
Brain	A530053G22Rik	1.0788	-1716.7	NA	NA	NA	NA	NA	NA	1	0	NA	NA	NA	NA	NA	NA	0.0702469	0.221012	NA	NA	NA	NA	NA	NA	26.9648	NA	NA	NA	NA	NA	NA	0.294059
Brain	Ptprk	-4.94574	NA	NA	NA	NA	NA	NA	NA	-1	NA	NA	NA	NA	NA	NA	NA	9.22e-05	NA	NA	NA	NA	NA	NA	NA	NA	NA	NA	NA	NA	NA	NA	0.293591
Brain	Gm43242	2.0193	-190.01	229.71	-0.095973	NA	NA	NA	NA	1	0	0	0	NA	NA	NA	NA	0.0706719	0.230276	0.193917	0.330829	NA	NA	NA	NA	8.98898	10.6692	12.0332	NA	NA	NA	NA	0.293142
Brain	Igkc	1.08945	NA	NA	NA	NA	NA	NA	NA	1	NA	NA	NA	NA	NA	NA	NA	0.000164128	NA	NA	NA	NA	NA	NA	NA	NA	NA	NA	NA	NA	NA	NA	0.293101
Brain	Pllp	-15.213	9.8392	NA	NA	NA	NA	NA	NA	0	1	NA	NA	NA	NA	NA	NA	0.23425	0.0700249	NA	NA	NA	NA	NA	NA	8.78901	NA	NA	NA	NA	NA	NA	0.29235
Brain	Parp3	1.36408	NA	NA	NA	NA	NA	NA	NA	1	NA	NA	NA	NA	NA	NA	NA	7.39e-05	NA	NA	NA	NA	NA	NA	NA	NA	NA	NA	NA	NA	NA	NA	0.291933
Brain	Icam1	1.52396	NA	NA	NA	NA	NA	NA	NA	1	NA	NA	NA	NA	NA	NA	NA	4.75e-05	NA	NA	NA	NA	NA	NA	NA	NA	NA	NA	NA	NA	NA	NA	0.291764
Brain	Rprd1a	-4.56012	NA	NA	NA	NA	NA	NA	NA	-1	NA	NA	NA	NA	NA	NA	NA	0.000147793	NA	NA	NA	NA	NA	NA	NA	NA	NA	NA	NA	NA	NA	NA	0.291324
Brain	Vezt	-3.68323	NA	NA	NA	NA	NA	NA	NA	-1	NA	NA	NA	NA	NA	NA	NA	0.00076356	NA	NA	NA	NA	NA	NA	NA	NA	NA	NA	NA	NA	NA	NA	0.290854
Brain	Wnt5b	0.750926	NA	NA	NA	NA	NA	NA	NA	1	NA	NA	NA	NA	NA	NA	NA	0.000264464	NA	NA	NA	NA	NA	NA	NA	NA	NA	NA	NA	NA	NA	NA	0.290477
Brain	Nfe2l2	2.53463	NA	NA	NA	NA	NA	NA	NA	1	NA	NA	NA	NA	NA	NA	NA	6.66e-05	NA	NA	NA	NA	NA	NA	NA	NA	NA	NA	NA	NA	NA	NA	0.288784
Brain	Rftn1	3.09494	NA	NA	NA	NA	NA	NA	NA	1	NA	NA	NA	NA	NA	NA	NA	5.44e-05	NA	NA	NA	NA	NA	NA	NA	NA	NA	NA	NA	NA	NA	NA	0.288543
Brain	Ccdc112	-2.6923	1.4291	NA	NA	NA	NA	NA	NA	0	1	NA	NA	NA	NA	NA	NA	0.108231	0.0948228	NA	NA	NA	NA	NA	NA	11.9682	NA	NA	NA	NA	NA	NA	0.288124
Brain	Trib2	-5.3583	NA	NA	NA	NA	NA	NA	NA	-1	NA	NA	NA	NA	NA	NA	NA	0.000427265	NA	NA	NA	NA	NA	NA	NA	NA	NA	NA	NA	NA	NA	NA	0.287908
Brain	Luzp1	-8.63518	NA	NA	NA	NA	NA	NA	NA	-1	NA	NA	NA	NA	NA	NA	NA	5.44e-05	NA	NA	NA	NA	NA	NA	NA	NA	NA	NA	NA	NA	NA	NA	0.287875
Brain	Uba7	1.49176	NA	NA	NA	NA	NA	NA	NA	1	NA	NA	NA	NA	NA	NA	NA	6.14e-05	NA	NA	NA	NA	NA	NA	NA	NA	NA	NA	NA	NA	NA	NA	0.287644
Brain	Defa-ps15	1.2319	-2.1387	0.064992	NA	NA	NA	NA	NA	1	0	0	NA	NA	NA	NA	NA	0.0750694	0.4835	0.373315	NA	NA	NA	NA	NA	10.1471	13.5783	NA	NA	NA	NA	NA	0.28751
Brain	Hjurp	6.70352	NA	NA	NA	NA	NA	NA	NA	1	NA	NA	NA	NA	NA	NA	NA	8.25e-05	NA	NA	NA	NA	NA	NA	NA	NA	NA	NA	NA	NA	NA	NA	0.286922
Brain	Gm14940	-0.145226	NA	NA	NA	NA	NA	NA	NA	-1	NA	NA	NA	NA	NA	NA	NA	0.0499084	NA	NA	NA	NA	NA	NA	NA	NA	NA	NA	NA	NA	NA	NA	0.28672
Brain	Robo3	-1.7794	3220.5	NA	NA	NA	NA	NA	NA	-1	0	NA	NA	NA	NA	NA	NA	0.0908255	0.243058	NA	NA	NA	NA	NA	NA	26.9637	NA	NA	NA	NA	NA	NA	0.286615
Brain	A230072C01Rik	-1.04233	NA	NA	NA	NA	NA	NA	NA	-1	NA	NA	NA	NA	NA	NA	NA	0.012844	NA	NA	NA	NA	NA	NA	NA	NA	NA	NA	NA	NA	NA	NA	0.286449
Brain	Atrx	-12.275	24.856	NA	NA	NA	NA	NA	NA	-1	0	NA	NA	NA	NA	NA	NA	0.089956	0.156326	NA	NA	NA	NA	NA	NA	19.7966	NA	NA	NA	NA	NA	NA	0.2861
Brain	Lpcat2	2.08376	NA	NA	NA	NA	NA	NA	NA	1	NA	NA	NA	NA	NA	NA	NA	5.81e-05	NA	NA	NA	NA	NA	NA	NA	NA	NA	NA	NA	NA	NA	NA	0.285889
Brain	Zfp711	-2.09702	NA	NA	NA	NA	NA	NA	NA	-1	NA	NA	NA	NA	NA	NA	NA	0.000349358	NA	NA	NA	NA	NA	NA	NA	NA	NA	NA	NA	NA	NA	NA	0.285269
Brain	Cdh1	1.94754	NA	NA	NA	NA	NA	NA	NA	1	NA	NA	NA	NA	NA	NA	NA	0.000170161	NA	NA	NA	NA	NA	NA	NA	NA	NA	NA	NA	NA	NA	NA	0.285231
Brain	Gm45619	-1.206	2.2057	NA	NA	NA	NA	NA	NA	0	1	NA	NA	NA	NA	NA	NA	0.105894	0.0967066	NA	NA	NA	NA	NA	NA	15.9241	NA	NA	NA	NA	NA	NA	0.285092
Brain	Lims1	-1.33883	NA	NA	NA	NA	NA	NA	NA	-1	NA	NA	NA	NA	NA	NA	NA	0.0347439	NA	NA	NA	NA	NA	NA	NA	NA	NA	NA	NA	NA	NA	NA	0.285075
Brain	B3galt1	-4.09947	NA	NA	NA	NA	NA	NA	NA	-1	NA	NA	NA	NA	NA	NA	NA	0.000328664	NA	NA	NA	NA	NA	NA	NA	NA	NA	NA	NA	NA	NA	NA	0.285061
Brain	Tmem167	-4.37746	NA	NA	NA	NA	NA	NA	NA	-1	NA	NA	NA	NA	NA	NA	NA	0.00012441	NA	NA	NA	NA	NA	NA	NA	NA	NA	NA	NA	NA	NA	NA	0.284844
Brain	Wfdc18	1.8908	-0.24192	NA	NA	NA	NA	NA	NA	1	0	NA	NA	NA	NA	NA	NA	0.0977661	0.241137	NA	NA	NA	NA	NA	NA	9.02601	NA	NA	NA	NA	NA	NA	0.284648
Brain	Gm20535	-0.29658	1.3155	NA	NA	NA	NA	NA	NA	0	1	NA	NA	NA	NA	NA	NA	0.205077	0.0873486	NA	NA	NA	NA	NA	NA	16.8215	NA	NA	NA	NA	NA	NA	0.284009
Brain	Ppl	1.09772	NA	NA	NA	NA	NA	NA	NA	1	NA	NA	NA	NA	NA	NA	NA	6.08e-05	NA	NA	NA	NA	NA	NA	NA	NA	NA	NA	NA	NA	NA	NA	0.283037
Brain	Plek	2.76758	NA	NA	NA	NA	NA	NA	NA	1	NA	NA	NA	NA	NA	NA	NA	6.09e-05	NA	NA	NA	NA	NA	NA	NA	NA	NA	NA	NA	NA	NA	NA	0.282976
Brain	Fcer1g	2.42909	NA	NA	NA	NA	NA	NA	NA	1	NA	NA	NA	NA	NA	NA	NA	7.19e-05	NA	NA	NA	NA	NA	NA	NA	NA	NA	NA	NA	NA	NA	NA	0.282346
Brain	Rbm28	-3.9036	NA	NA	NA	NA	NA	NA	NA	-1	NA	NA	NA	NA	NA	NA	NA	0.00295732	NA	NA	NA	NA	NA	NA	NA	NA	NA	NA	NA	NA	NA	NA	0.282101
Brain	Gbp4	2.34031	NA	NA	NA	NA	NA	NA	NA	1	NA	NA	NA	NA	NA	NA	NA	8.85e-05	NA	NA	NA	NA	NA	NA	NA	NA	NA	NA	NA	NA	NA	NA	0.28206
Brain	Gm43820	-452.37	0.19646	NA	NA	NA	NA	NA	NA	-1	0	NA	NA	NA	NA	NA	NA	0.080484	0.198708	NA	NA	NA	NA	NA	NA	3.00698	NA	NA	NA	NA	NA	NA	0.281969
Brain	Slc26a8	0.819444	NA	NA	NA	NA	NA	NA	NA	1	NA	NA	NA	NA	NA	NA	NA	0.00473602	NA	NA	NA	NA	NA	NA	NA	NA	NA	NA	NA	NA	NA	NA	0.281831
Brain	Orc4	-4.68461	NA	NA	NA	NA	NA	NA	NA	-1	NA	NA	NA	NA	NA	NA	NA	7.52e-05	NA	NA	NA	NA	NA	NA	NA	NA	NA	NA	NA	NA	NA	NA	0.28094
Brain	Tnxb	1.09864	NA	NA	NA	NA	NA	NA	NA	1	NA	NA	NA	NA	NA	NA	NA	6.6e-05	NA	NA	NA	NA	NA	NA	NA	NA	NA	NA	NA	NA	NA	NA	0.280542
Brain	Hapln2	9.67836	NA	NA	NA	NA	NA	NA	NA	1	NA	NA	NA	NA	NA	NA	NA	7.01e-05	NA	NA	NA	NA	NA	NA	NA	NA	NA	NA	NA	NA	NA	NA	0.280134
Brain	Cnksr1	-0.21334	5.9296	NA	NA	NA	NA	NA	NA	0	1	NA	NA	NA	NA	NA	NA	0.220245	0.0876535	NA	NA	NA	NA	NA	NA	23.5762	NA	NA	NA	NA	NA	NA	0.279691
Brain	Endou	0.620826	NA	NA	NA	NA	NA	NA	NA	1	NA	NA	NA	NA	NA	NA	NA	0.00278671	NA	NA	NA	NA	NA	NA	NA	NA	NA	NA	NA	NA	NA	NA	0.279519
Brain	Tmem125	-869.98	3.31	NA	NA	NA	NA	NA	NA	0	1	NA	NA	NA	NA	NA	NA	0.173069	0.0820636	NA	NA	NA	NA	NA	NA	3.07579	NA	NA	NA	NA	NA	NA	0.278021
Brain	Ifitm3	3.27702	NA	NA	NA	NA	NA	NA	NA	1	NA	NA	NA	NA	NA	NA	NA	7.55e-05	NA	NA	NA	NA	NA	NA	NA	NA	NA	NA	NA	NA	NA	NA	0.277705
Brain	Tln1	4.53557	NA	NA	NA	NA	NA	NA	NA	1	NA	NA	NA	NA	NA	NA	NA	0.000252764	NA	NA	NA	NA	NA	NA	NA	NA	NA	NA	NA	NA	NA	NA	0.277437
Brain	Sned1	2.8501	NA	NA	NA	NA	NA	NA	NA	1	NA	NA	NA	NA	NA	NA	NA	0.000156781	NA	NA	NA	NA	NA	NA	NA	NA	NA	NA	NA	NA	NA	NA	0.277222
Brain	Gjb2	3.41627	NA	NA	NA	NA	NA	NA	NA	1	NA	NA	NA	NA	NA	NA	NA	0.000169288	NA	NA	NA	NA	NA	NA	NA	NA	NA	NA	NA	NA	NA	NA	0.276668
Brain	Sbno1	-10.1937	NA	NA	NA	NA	NA	NA	NA	-1	NA	NA	NA	NA	NA	NA	NA	0.000893503	NA	NA	NA	NA	NA	NA	NA	NA	NA	NA	NA	NA	NA	NA	0.275278
Brain	Gpr179	2.2262	-278.4	1.2949	NA	NA	NA	NA	NA	1	0	0	NA	NA	NA	NA	NA	0.0935348	0.203503	0.107102	NA	NA	NA	NA	NA	11.9701	12.0511	NA	NA	NA	NA	NA	0.274895
Brain	Cd209f	0.607879	NA	NA	NA	NA	NA	NA	NA	1	NA	NA	NA	NA	NA	NA	NA	8.8e-05	NA	NA	NA	NA	NA	NA	NA	NA	NA	NA	NA	NA	NA	NA	0.274442
Brain	Pcdhga5	2.08426	NA	NA	NA	NA	NA	NA	NA	1	NA	NA	NA	NA	NA	NA	NA	0.000156235	NA	NA	NA	NA	NA	NA	NA	NA	NA	NA	NA	NA	NA	NA	0.273973
Brain	Eif2s1	-3.99146	NA	NA	NA	NA	NA	NA	NA	-1	NA	NA	NA	NA	NA	NA	NA	0.000153783	NA	NA	NA	NA	NA	NA	NA	NA	NA	NA	NA	NA	NA	NA	0.273939
Brain	Cd52	0.523228	NA	NA	NA	NA	NA	NA	NA	1	NA	NA	NA	NA	NA	NA	NA	0.000214888	NA	NA	NA	NA	NA	NA	NA	NA	NA	NA	NA	NA	NA	NA	0.273922
Brain	Myo1d	4.1812	NA	NA	NA	NA	NA	NA	NA	1	NA	NA	NA	NA	NA	NA	NA	9.68e-05	NA	NA	NA	NA	NA	NA	NA	NA	NA	NA	NA	NA	NA	NA	0.273852
Brain	Ints10	-5.43914	NA	NA	NA	NA	NA	NA	NA	-1	NA	NA	NA	NA	NA	NA	NA	0.000180465	NA	NA	NA	NA	NA	NA	NA	NA	NA	NA	NA	NA	NA	NA	0.273806
Brain	Ahr	4.1702	-5.2783	NA	NA	NA	NA	NA	NA	0	-1	NA	NA	NA	NA	NA	NA	0.119135	0.0835118	NA	NA	NA	NA	NA	NA	14.9689	NA	NA	NA	NA	NA	NA	0.273035
Brain	Gm37459	-1.66209	NA	NA	NA	NA	NA	NA	NA	-1	NA	NA	NA	NA	NA	NA	NA	0.000159673	NA	NA	NA	NA	NA	NA	NA	NA	NA	NA	NA	NA	NA	NA	0.272944
Brain	R3hdm2	-11.8381	NA	NA	NA	NA	NA	NA	NA	-1	NA	NA	NA	NA	NA	NA	NA	0.000188982	NA	NA	NA	NA	NA	NA	NA	NA	NA	NA	NA	NA	NA	NA	0.272058
Brain	Gm44860	0.91876	-2.6707	NA	NA	NA	NA	NA	NA	1	0	NA	NA	NA	NA	NA	NA	0.0722895	0.206591	NA	NA	NA	NA	NA	NA	21.9183	NA	NA	NA	NA	NA	NA	0.271809
Brain	Gm18781	-0.73497	26.442	-0.35058	NA	NA	NA	NA	NA	0	0	-1	NA	NA	NA	NA	NA	0.193615	0.374263	0.0813598	NA	NA	NA	NA	NA	8.71251	9.00452	NA	NA	NA	NA	NA	0.271579
Brain	Ifitm6	0.137232	NA	NA	NA	NA	NA	NA	NA	1	NA	NA	NA	NA	NA	NA	NA	0.018017	NA	NA	NA	NA	NA	NA	NA	NA	NA	NA	NA	NA	NA	NA	0.271475
Brain	Acot3	0.495527	NA	NA	NA	NA	NA	NA	NA	1	NA	NA	NA	NA	NA	NA	NA	0.0550875	NA	NA	NA	NA	NA	NA	NA	NA	NA	NA	NA	NA	NA	NA	0.271209
Brain	Rbp3	0.7289	-1.1947	NA	NA	NA	NA	NA	NA	1	0	NA	NA	NA	NA	NA	NA	0.0812805	0.127615	NA	NA	NA	NA	NA	NA	18.0427	NA	NA	NA	NA	NA	NA	0.271031
Brain	Rarg	1.5695	NA	NA	NA	NA	NA	NA	NA	1	NA	NA	NA	NA	NA	NA	NA	9.89e-05	NA	NA	NA	NA	NA	NA	NA	NA	NA	NA	NA	NA	NA	NA	0.270751
Brain	Nlrp5-ps	0.782981	NA	NA	NA	NA	NA	NA	NA	1	NA	NA	NA	NA	NA	NA	NA	8.91e-05	NA	NA	NA	NA	NA	NA	NA	NA	NA	NA	NA	NA	NA	NA	0.2707
Brain	Arsg	5.46196	NA	NA	NA	NA	NA	NA	NA	1	NA	NA	NA	NA	NA	NA	NA	0.000174492	NA	NA	NA	NA	NA	NA	NA	NA	NA	NA	NA	NA	NA	NA	0.270669
Brain	Opalin	-14.772	6.7915	NA	NA	NA	NA	NA	NA	0	1	NA	NA	NA	NA	NA	NA	0.163596	0.0815535	NA	NA	NA	NA	NA	NA	8.94229	NA	NA	NA	NA	NA	NA	0.270327
Brain	Gm20559	0.731072	NA	NA	NA	NA	NA	NA	NA	1	NA	NA	NA	NA	NA	NA	NA	9.61e-05	NA	NA	NA	NA	NA	NA	NA	NA	NA	NA	NA	NA	NA	NA	0.270275
Brain	Glra2	-1.42697	NA	NA	NA	NA	NA	NA	NA	-1	NA	NA	NA	NA	NA	NA	NA	0.00367604	NA	NA	NA	NA	NA	NA	NA	NA	NA	NA	NA	NA	NA	NA	0.270172
Brain	Hs3st3b1	1.01403	NA	NA	NA	NA	NA	NA	NA	1	NA	NA	NA	NA	NA	NA	NA	0.00187564	NA	NA	NA	NA	NA	NA	NA	NA	NA	NA	NA	NA	NA	NA	0.268888
Brain	Gm17322	-0.938793	NA	NA	NA	NA	NA	NA	NA	-1	NA	NA	NA	NA	NA	NA	NA	0.00195038	NA	NA	NA	NA	NA	NA	NA	NA	NA	NA	NA	NA	NA	NA	0.26868
Brain	Cntn6	-4.48992	NA	NA	NA	NA	NA	NA	NA	-1	NA	NA	NA	NA	NA	NA	NA	0.000101757	NA	NA	NA	NA	NA	NA	NA	NA	NA	NA	NA	NA	NA	NA	0.266794
Brain	Galnt16	7.13052	NA	NA	NA	NA	NA	NA	NA	1	NA	NA	NA	NA	NA	NA	NA	0.000414525	NA	NA	NA	NA	NA	NA	NA	NA	NA	NA	NA	NA	NA	NA	0.266688
Brain	Bcl2l12	0.383563	NA	NA	NA	NA	NA	NA	NA	1	NA	NA	NA	NA	NA	NA	NA	0.00061676	NA	NA	NA	NA	NA	NA	NA	NA	NA	NA	NA	NA	NA	NA	0.266636
Brain	Pgm2l1	-13.5161	NA	NA	NA	NA	NA	NA	NA	-1	NA	NA	NA	NA	NA	NA	NA	0.000777586	NA	NA	NA	NA	NA	NA	NA	NA	NA	NA	NA	NA	NA	NA	0.26635
Brain	Vsir	1.26725	NA	NA	NA	NA	NA	NA	NA	1	NA	NA	NA	NA	NA	NA	NA	0.0475506	NA	NA	NA	NA	NA	NA	NA	NA	NA	NA	NA	NA	NA	NA	0.26623
Brain	Parp6	-11.5876	NA	NA	NA	NA	NA	NA	NA	-1	NA	NA	NA	NA	NA	NA	NA	0.000157037	NA	NA	NA	NA	NA	NA	NA	NA	NA	NA	NA	NA	NA	NA	0.266132
Brain	Gria4	-8.9906	NA	NA	NA	NA	NA	NA	NA	-1	NA	NA	NA	NA	NA	NA	NA	0.000150874	NA	NA	NA	NA	NA	NA	NA	NA	NA	NA	NA	NA	NA	NA	0.265707
Brain	Vav1	1.41529	NA	NA	NA	NA	NA	NA	NA	1	NA	NA	NA	NA	NA	NA	NA	0.00010549	NA	NA	NA	NA	NA	NA	NA	NA	NA	NA	NA	NA	NA	NA	0.265561
Brain	Plxnb3	2.89066	NA	NA	NA	NA	NA	NA	NA	1	NA	NA	NA	NA	NA	NA	NA	0.00543943	NA	NA	NA	NA	NA	NA	NA	NA	NA	NA	NA	NA	NA	NA	0.265326
Brain	Serpinb1a	3.00992	NA	NA	NA	NA	NA	NA	NA	1	NA	NA	NA	NA	NA	NA	NA	0.000139558	NA	NA	NA	NA	NA	NA	NA	NA	NA	NA	NA	NA	NA	NA	0.265084
Brain	Tgfb3	1.49057	NA	NA	NA	NA	NA	NA	NA	1	NA	NA	NA	NA	NA	NA	NA	0.0509522	NA	NA	NA	NA	NA	NA	NA	NA	NA	NA	NA	NA	NA	NA	0.264741
Brain	Ypel1	-2.7184	1507.4	NA	NA	NA	NA	NA	NA	-1	0	NA	NA	NA	NA	NA	NA	0.0936203	0.404332	NA	NA	NA	NA	NA	NA	26.9282	NA	NA	NA	NA	NA	NA	0.264692
Brain	Gm12799	0.257138	NA	NA	NA	NA	NA	NA	NA	1	NA	NA	NA	NA	NA	NA	NA	0.000645081	NA	NA	NA	NA	NA	NA	NA	NA	NA	NA	NA	NA	NA	NA	0.264623
Brain	Hfe	1.54848	NA	NA	NA	NA	NA	NA	NA	1	NA	NA	NA	NA	NA	NA	NA	0.000109144	NA	NA	NA	NA	NA	NA	NA	NA	NA	NA	NA	NA	NA	NA	0.264218
Brain	Prr16	-2.19915	NA	NA	NA	NA	NA	NA	NA	-1	NA	NA	NA	NA	NA	NA	NA	0.000180714	NA	NA	NA	NA	NA	NA	NA	NA	NA	NA	NA	NA	NA	NA	0.263892
Brain	Mfsd2a	-4.16768	NA	NA	NA	NA	NA	NA	NA	-1	NA	NA	NA	NA	NA	NA	NA	0.000129591	NA	NA	NA	NA	NA	NA	NA	NA	NA	NA	NA	NA	NA	NA	0.263377
Brain	Ahsa1	-8.89699	NA	NA	NA	NA	NA	NA	NA	-1	NA	NA	NA	NA	NA	NA	NA	0.000113604	NA	NA	NA	NA	NA	NA	NA	NA	NA	NA	NA	NA	NA	NA	0.263181
Brain	Cbln4	-2.88777	NA	NA	NA	NA	NA	NA	NA	-1	NA	NA	NA	NA	NA	NA	NA	0.000113047	NA	NA	NA	NA	NA	NA	NA	NA	NA	NA	NA	NA	NA	NA	0.263172
Brain	Spata5	2.123	-5.8422	NA	NA	NA	NA	NA	NA	1	0	NA	NA	NA	NA	NA	NA	0.084425	0.155249	NA	NA	NA	NA	NA	NA	20.9802	NA	NA	NA	NA	NA	NA	0.263147
Brain	Dhx37	1.61522	NA	NA	NA	NA	NA	NA	NA	1	NA	NA	NA	NA	NA	NA	NA	0.000204158	NA	NA	NA	NA	NA	NA	NA	NA	NA	NA	NA	NA	NA	NA	0.263
Brain	Kcnv1	-6.01699	NA	NA	NA	NA	NA	NA	NA	-1	NA	NA	NA	NA	NA	NA	NA	0.000465328	NA	NA	NA	NA	NA	NA	NA	NA	NA	NA	NA	NA	NA	NA	0.262543
Brain	Pde10a	-9.96514	NA	NA	NA	NA	NA	NA	NA	-1	NA	NA	NA	NA	NA	NA	NA	0.0062893	NA	NA	NA	NA	NA	NA	NA	NA	NA	NA	NA	NA	NA	NA	0.262515
Brain	Kcnh7	-6.3138	NA	NA	NA	NA	NA	NA	NA	-1	NA	NA	NA	NA	NA	NA	NA	0.000421902	NA	NA	NA	NA	NA	NA	NA	NA	NA	NA	NA	NA	NA	NA	0.261747
Brain	Cd82	3.82502	NA	NA	NA	NA	NA	NA	NA	1	NA	NA	NA	NA	NA	NA	NA	0.000118125	NA	NA	NA	NA	NA	NA	NA	NA	NA	NA	NA	NA	NA	NA	0.261605
Brain	Rpgr	-1.35081	NA	NA	NA	NA	NA	NA	NA	-1	NA	NA	NA	NA	NA	NA	NA	0.0128063	NA	NA	NA	NA	NA	NA	NA	NA	NA	NA	NA	NA	NA	NA	0.261324
Brain	Ighm	4.46935	NA	NA	NA	NA	NA	NA	NA	1	NA	NA	NA	NA	NA	NA	NA	0.00302294	NA	NA	NA	NA	NA	NA	NA	NA	NA	NA	NA	NA	NA	NA	0.261319
Brain	Gbp2	1.60211	NA	NA	NA	NA	NA	NA	NA	1	NA	NA	NA	NA	NA	NA	NA	0.000122673	NA	NA	NA	NA	NA	NA	NA	NA	NA	NA	NA	NA	NA	NA	0.260953
Brain	H2-Ab1	1.85425	NA	NA	NA	NA	NA	NA	NA	1	NA	NA	NA	NA	NA	NA	NA	0.000323906	NA	NA	NA	NA	NA	NA	NA	NA	NA	NA	NA	NA	NA	NA	0.260748
Brain	Gm14204	-0.88655	7.1097	NA	NA	NA	NA	NA	NA	0	1	NA	NA	NA	NA	NA	NA	0.173128	0.0872668	NA	NA	NA	NA	NA	NA	20.5795	NA	NA	NA	NA	NA	NA	0.260692
Brain	Kitl	-6.59443	NA	NA	NA	NA	NA	NA	NA	-1	NA	NA	NA	NA	NA	NA	NA	0.000273914	NA	NA	NA	NA	NA	NA	NA	NA	NA	NA	NA	NA	NA	NA	0.260407
Brain	Ifit2	2.79278	NA	NA	NA	NA	NA	NA	NA	1	NA	NA	NA	NA	NA	NA	NA	0.000130915	NA	NA	NA	NA	NA	NA	NA	NA	NA	NA	NA	NA	NA	NA	0.260209
Brain	Gm40518	1.23436	NA	NA	NA	NA	NA	NA	NA	1	NA	NA	NA	NA	NA	NA	NA	0.0002196	NA	NA	NA	NA	NA	NA	NA	NA	NA	NA	NA	NA	NA	NA	0.259662
Brain	1700126G02Rik	0.356649	NA	NA	NA	NA	NA	NA	NA	1	NA	NA	NA	NA	NA	NA	NA	0.000403855	NA	NA	NA	NA	NA	NA	NA	NA	NA	NA	NA	NA	NA	NA	0.259626
Brain	Gabra2	-6.93714	NA	NA	NA	NA	NA	NA	NA	-1	NA	NA	NA	NA	NA	NA	NA	0.000140007	NA	NA	NA	NA	NA	NA	NA	NA	NA	NA	NA	NA	NA	NA	0.259621
Brain	Gm43362	0.61556	-892.46	NA	NA	NA	NA	NA	NA	1	0	NA	NA	NA	NA	NA	NA	0.0904062	0.277442	NA	NA	NA	NA	NA	NA	26.9573	NA	NA	NA	NA	NA	NA	0.259554
Brain	Mboat1	1.17642	NA	NA	NA	NA	NA	NA	NA	1	NA	NA	NA	NA	NA	NA	NA	0.000176858	NA	NA	NA	NA	NA	NA	NA	NA	NA	NA	NA	NA	NA	NA	0.259535
Brain	Wdr44	-1.23417	NA	NA	NA	NA	NA	NA	NA	-1	NA	NA	NA	NA	NA	NA	NA	0.0653092	NA	NA	NA	NA	NA	NA	NA	NA	NA	NA	NA	NA	NA	NA	0.259428
Brain	Bmp6	3.28461	NA	NA	NA	NA	NA	NA	NA	1	NA	NA	NA	NA	NA	NA	NA	0.000201157	NA	NA	NA	NA	NA	NA	NA	NA	NA	NA	NA	NA	NA	NA	0.259206
Brain	Sgpl1	4.36533	NA	NA	NA	NA	NA	NA	NA	1	NA	NA	NA	NA	NA	NA	NA	0.000128169	NA	NA	NA	NA	NA	NA	NA	NA	NA	NA	NA	NA	NA	NA	0.25884
Brain	Pgd	-6.6852	5.8705	NA	NA	NA	NA	NA	NA	0	1	NA	NA	NA	NA	NA	NA	0.179303	0.0852486	NA	NA	NA	NA	NA	NA	10.5308	NA	NA	NA	NA	NA	NA	0.258529
Brain	Arpc1b	-3.1213	7.4535	NA	NA	NA	NA	NA	NA	0	1	NA	NA	NA	NA	NA	NA	0.207678	0.0860267	NA	NA	NA	NA	NA	NA	13.9698	NA	NA	NA	NA	NA	NA	0.258428
Brain	Cbx5	-10.9736	NA	NA	NA	NA	NA	NA	NA	-1	NA	NA	NA	NA	NA	NA	NA	0.00878133	NA	NA	NA	NA	NA	NA	NA	NA	NA	NA	NA	NA	NA	NA	0.258087
Brain	Eps8	-5.53773	NA	NA	NA	NA	NA	NA	NA	-1	NA	NA	NA	NA	NA	NA	NA	0.000151763	NA	NA	NA	NA	NA	NA	NA	NA	NA	NA	NA	NA	NA	NA	0.257519
Brain	Oasl1	0.481979	NA	NA	NA	NA	NA	NA	NA	1	NA	NA	NA	NA	NA	NA	NA	0.000145181	NA	NA	NA	NA	NA	NA	NA	NA	NA	NA	NA	NA	NA	NA	0.257469
Brain	Rac2	1.06554	NA	NA	NA	NA	NA	NA	NA	1	NA	NA	NA	NA	NA	NA	NA	0.000148069	NA	NA	NA	NA	NA	NA	NA	NA	NA	NA	NA	NA	NA	NA	0.257118
Brain	Gm5815	1.4317	-0.47623	NA	NA	NA	NA	NA	NA	0	-1	NA	NA	NA	NA	NA	NA	0.121414	0.0960501	NA	NA	NA	NA	NA	NA	9.00467	NA	NA	NA	NA	NA	NA	0.256236
Brain	Gm7790	-0.213485	NA	NA	NA	NA	NA	NA	NA	-1	NA	NA	NA	NA	NA	NA	NA	0.0271863	NA	NA	NA	NA	NA	NA	NA	NA	NA	NA	NA	NA	NA	NA	0.256026
Brain	Nol4	-10.2043	NA	NA	NA	NA	NA	NA	NA	-1	NA	NA	NA	NA	NA	NA	NA	0.000197285	NA	NA	NA	NA	NA	NA	NA	NA	NA	NA	NA	NA	NA	NA	0.255859
Brain	Ccl6	0.605899	NA	NA	NA	NA	NA	NA	NA	1	NA	NA	NA	NA	NA	NA	NA	0.000415154	NA	NA	NA	NA	NA	NA	NA	NA	NA	NA	NA	NA	NA	NA	0.255604
Brain	P2ry2	0.547189	NA	NA	NA	NA	NA	NA	NA	1	NA	NA	NA	NA	NA	NA	NA	0.000355822	NA	NA	NA	NA	NA	NA	NA	NA	NA	NA	NA	NA	NA	NA	0.255177
Brain	Gm18861	79.356	-0.23519	NA	NA	NA	NA	NA	NA	0	-1	NA	NA	NA	NA	NA	NA	0.128651	0.0939585	NA	NA	NA	NA	NA	NA	3.05557	NA	NA	NA	NA	NA	NA	0.255122
Brain	Comp	0.66049	NA	NA	NA	NA	NA	NA	NA	1	NA	NA	NA	NA	NA	NA	NA	0.000148933	NA	NA	NA	NA	NA	NA	NA	NA	NA	NA	NA	NA	NA	NA	0.254774
Brain	Airn	192	-1.6349	NA	NA	NA	NA	NA	NA	0	-1	NA	NA	NA	NA	NA	NA	0.2352	0.0750017	NA	NA	NA	NA	NA	NA	3.13138	NA	NA	NA	NA	NA	NA	0.254717
Brain	D430041D05Rik	-8.87454	NA	NA	NA	NA	NA	NA	NA	-1	NA	NA	NA	NA	NA	NA	NA	0.000468143	NA	NA	NA	NA	NA	NA	NA	NA	NA	NA	NA	NA	NA	NA	0.254705
Brain	Itpr3	1.48231	NA	NA	NA	NA	NA	NA	NA	1	NA	NA	NA	NA	NA	NA	NA	0.000290435	NA	NA	NA	NA	NA	NA	NA	NA	NA	NA	NA	NA	NA	NA	0.254595
Brain	1810030O07Rik	2.40792	NA	NA	NA	NA	NA	NA	NA	1	NA	NA	NA	NA	NA	NA	NA	0.00148309	NA	NA	NA	NA	NA	NA	NA	NA	NA	NA	NA	NA	NA	NA	0.25404
Brain	Prkag3	0.400339	NA	NA	NA	NA	NA	NA	NA	1	NA	NA	NA	NA	NA	NA	NA	0.000287753	NA	NA	NA	NA	NA	NA	NA	NA	NA	NA	NA	NA	NA	NA	0.254004
Brain	Igsf9b	-14.1616	NA	NA	NA	NA	NA	NA	NA	-1	NA	NA	NA	NA	NA	NA	NA	0.00169222	NA	NA	NA	NA	NA	NA	NA	NA	NA	NA	NA	NA	NA	NA	0.253948
Brain	Pofut1	1.80644	NA	NA	NA	NA	NA	NA	NA	1	NA	NA	NA	NA	NA	NA	NA	0.000497631	NA	NA	NA	NA	NA	NA	NA	NA	NA	NA	NA	NA	NA	NA	0.253782
Brain	Tmbim1	7.32407	NA	NA	NA	NA	NA	NA	NA	1	NA	NA	NA	NA	NA	NA	NA	0.000153358	NA	NA	NA	NA	NA	NA	NA	NA	NA	NA	NA	NA	NA	NA	0.253106
Brain	Crybg3	6.6342	-1761.2	-0.45677	NA	NA	NA	NA	NA	1	0	0	NA	NA	NA	NA	NA	0.0960951	0.237558	0.393432	NA	NA	NA	NA	NA	12.0048	12.0346	NA	NA	NA	NA	NA	0.253074
Brain	Rgs20	-2.39841	NA	NA	NA	NA	NA	NA	NA	-1	NA	NA	NA	NA	NA	NA	NA	0.000646788	NA	NA	NA	NA	NA	NA	NA	NA	NA	NA	NA	NA	NA	NA	0.252947
Brain	Gm15619	0.70013	-93.268	0.92919	NA	NA	NA	NA	NA	0	0	1	NA	NA	NA	NA	NA	0.19222	0.198849	0.0843616	NA	NA	NA	NA	NA	11.9621	12.0969	NA	NA	NA	NA	NA	0.252667
Brain	Sgk2	1.16543	NA	NA	NA	NA	NA	NA	NA	1	NA	NA	NA	NA	NA	NA	NA	0.000392109	NA	NA	NA	NA	NA	NA	NA	NA	NA	NA	NA	NA	NA	NA	0.252638
Brain	Gabra6	-11.7878	NA	NA	NA	NA	NA	NA	NA	-1	NA	NA	NA	NA	NA	NA	NA	0.000194817	NA	NA	NA	NA	NA	NA	NA	NA	NA	NA	NA	NA	NA	NA	0.252498
Brain	Psg16	0.746703	NA	NA	NA	NA	NA	NA	NA	1	NA	NA	NA	NA	NA	NA	NA	0.0303781	NA	NA	NA	NA	NA	NA	NA	NA	NA	NA	NA	NA	NA	NA	0.252487
Brain	Pgam1-ps2	-0.288829	NA	NA	NA	NA	NA	NA	NA	-1	NA	NA	NA	NA	NA	NA	NA	0.000201067	NA	NA	NA	NA	NA	NA	NA	NA	NA	NA	NA	NA	NA	NA	0.252024
Brain	Gatm	12.7389	NA	NA	NA	NA	NA	NA	NA	1	NA	NA	NA	NA	NA	NA	NA	0.000158527	NA	NA	NA	NA	NA	NA	NA	NA	NA	NA	NA	NA	NA	NA	0.251836
Brain	Lnpk	-3.19563	NA	NA	NA	NA	NA	NA	NA	-1	NA	NA	NA	NA	NA	NA	NA	0.00619115	NA	NA	NA	NA	NA	NA	NA	NA	NA	NA	NA	NA	NA	NA	0.251813
Brain	Olfm3	-9.28866	NA	NA	NA	NA	NA	NA	NA	-1	NA	NA	NA	NA	NA	NA	NA	0.000363695	NA	NA	NA	NA	NA	NA	NA	NA	NA	NA	NA	NA	NA	NA	0.251709
Brain	Bmpr2	-8.86878	NA	NA	NA	NA	NA	NA	NA	-1	NA	NA	NA	NA	NA	NA	NA	0.000771394	NA	NA	NA	NA	NA	NA	NA	NA	NA	NA	NA	NA	NA	NA	0.251455
Brain	Cmc1	16.173	-1576.3	0.25181	NA	NA	NA	NA	NA	1	0	0	NA	NA	NA	NA	NA	0.0934814	0.266817	0.362035	NA	NA	NA	NA	NA	6.01741	6.05223	NA	NA	NA	NA	NA	0.251417
Brain	Dio2	-3.94014	NA	NA	NA	NA	NA	NA	NA	-1	NA	NA	NA	NA	NA	NA	NA	0.001989	NA	NA	NA	NA	NA	NA	NA	NA	NA	NA	NA	NA	NA	NA	0.251288
Brain	Gm45606	-2.59759	NA	NA	NA	NA	NA	NA	NA	-1	NA	NA	NA	NA	NA	NA	NA	0.000162948	NA	NA	NA	NA	NA	NA	NA	NA	NA	NA	NA	NA	NA	NA	0.251288
Brain	1500015A07Rik	-0.595432	NA	NA	NA	NA	NA	NA	NA	-1	NA	NA	NA	NA	NA	NA	NA	0.00447966	NA	NA	NA	NA	NA	NA	NA	NA	NA	NA	NA	NA	NA	NA	0.251184
Brain	Vopp1	-8.39928	NA	NA	NA	NA	NA	NA	NA	-1	NA	NA	NA	NA	NA	NA	NA	0.000186006	NA	NA	NA	NA	NA	NA	NA	NA	NA	NA	NA	NA	NA	NA	0.251065
Brain	Arpp21	-24.2316	NA	NA	NA	NA	NA	NA	NA	-1	NA	NA	NA	NA	NA	NA	NA	0.000818402	NA	NA	NA	NA	NA	NA	NA	NA	NA	NA	NA	NA	NA	NA	0.250923
Brain	Dpysl4	-14.459	2.9092	NA	NA	NA	NA	NA	NA	-1	0	NA	NA	NA	NA	NA	NA	0.0975426	0.172898	NA	NA	NA	NA	NA	NA	9.93063	NA	NA	NA	NA	NA	NA	0.250636
Brain	Hnf1b	1.1723	-0.83115	NA	NA	NA	NA	NA	NA	1	0	NA	NA	NA	NA	NA	NA	0.0943344	0.11425	NA	NA	NA	NA	NA	NA	13.6052	NA	NA	NA	NA	NA	NA	0.25059
Brain	Gm28111	0.51635	-0.33807	NA	NA	NA	NA	NA	NA	1	0	NA	NA	NA	NA	NA	NA	0.0922699	0.119592	NA	NA	NA	NA	NA	NA	13.4518	NA	NA	NA	NA	NA	NA	0.250464
Brain	1700042O05Rik	0.83342	-42.054	0.026346	NA	NA	NA	NA	NA	1	0	0	NA	NA	NA	NA	NA	0.0977429	0.198025	0.440581	NA	NA	NA	NA	NA	11.9047	12.0752	NA	NA	NA	NA	NA	0.250292
Brain	Gm8480	-0.0863634	NA	NA	NA	NA	NA	NA	NA	-1	NA	NA	NA	NA	NA	NA	NA	0.0861877	NA	NA	NA	NA	NA	NA	NA	NA	NA	NA	NA	NA	NA	NA	0.24988
Brain	Gm47710	-0.912565	NA	NA	NA	NA	NA	NA	NA	-1	NA	NA	NA	NA	NA	NA	NA	0.000684363	NA	NA	NA	NA	NA	NA	NA	NA	NA	NA	NA	NA	NA	NA	0.249869
Brain	Uap1	-5.50152	NA	NA	NA	NA	NA	NA	NA	-1	NA	NA	NA	NA	NA	NA	NA	0.000170982	NA	NA	NA	NA	NA	NA	NA	NA	NA	NA	NA	NA	NA	NA	0.249615
Brain	Golga7b	-14.4846	NA	NA	NA	NA	NA	NA	NA	-1	NA	NA	NA	NA	NA	NA	NA	0.000246491	NA	NA	NA	NA	NA	NA	NA	NA	NA	NA	NA	NA	NA	NA	0.249555
Brain	Adgrg2	0.654114	NA	NA	NA	NA	NA	NA	NA	1	NA	NA	NA	NA	NA	NA	NA	0.0178461	NA	NA	NA	NA	NA	NA	NA	NA	NA	NA	NA	NA	NA	NA	0.249522
Brain	C1galt1c1	-1.48873	NA	NA	NA	NA	NA	NA	NA	-1	NA	NA	NA	NA	NA	NA	NA	0.00458133	NA	NA	NA	NA	NA	NA	NA	NA	NA	NA	NA	NA	NA	NA	0.249176
Brain	Zc3h12a	0.44897	-0.61186	NA	NA	NA	NA	NA	NA	1	0	NA	NA	NA	NA	NA	NA	0.0962981	0.156099	NA	NA	NA	NA	NA	NA	18.0262	NA	NA	NA	NA	NA	NA	0.249174
Brain	Fgr	0.515151	NA	NA	NA	NA	NA	NA	NA	1	NA	NA	NA	NA	NA	NA	NA	0.000207151	NA	NA	NA	NA	NA	NA	NA	NA	NA	NA	NA	NA	NA	NA	0.248852
Brain	Cfh	6.17578	NA	NA	NA	NA	NA	NA	NA	1	NA	NA	NA	NA	NA	NA	NA	0.000668147	NA	NA	NA	NA	NA	NA	NA	NA	NA	NA	NA	NA	NA	NA	0.24872
Brain	Prr14l	-7.73045	NA	NA	NA	NA	NA	NA	NA	-1	NA	NA	NA	NA	NA	NA	NA	0.000378209	NA	NA	NA	NA	NA	NA	NA	NA	NA	NA	NA	NA	NA	NA	0.248451
Brain	Dmtf1	-5.59535	NA	NA	NA	NA	NA	NA	NA	-1	NA	NA	NA	NA	NA	NA	NA	0.000450202	NA	NA	NA	NA	NA	NA	NA	NA	NA	NA	NA	NA	NA	NA	0.248409
Brain	Agpat5	-6.47898	NA	NA	NA	NA	NA	NA	NA	-1	NA	NA	NA	NA	NA	NA	NA	0.000362198	NA	NA	NA	NA	NA	NA	NA	NA	NA	NA	NA	NA	NA	NA	0.248291
Brain	Tspan13	-14.7049	NA	NA	NA	NA	NA	NA	NA	-1	NA	NA	NA	NA	NA	NA	NA	0.000246891	NA	NA	NA	NA	NA	NA	NA	NA	NA	NA	NA	NA	NA	NA	0.248034
Brain	Mterf3	-1.70429	NA	NA	NA	NA	NA	NA	NA	-1	NA	NA	NA	NA	NA	NA	NA	0.00027116	NA	NA	NA	NA	NA	NA	NA	NA	NA	NA	NA	NA	NA	NA	0.248034
Brain	2700062C07Rik	6.2414	-2.9032	3.9907	NA	NA	NA	NA	NA	0	-1	0	NA	NA	NA	NA	NA	0.135127	0.0984929	0.135165	NA	NA	NA	NA	NA	6.82999	19.4226	NA	NA	NA	NA	NA	0.247989
Brain	Mag	-73.94	53.235	NA	NA	NA	NA	NA	NA	0	1	NA	NA	NA	NA	NA	NA	0.183746	0.084342	NA	NA	NA	NA	NA	NA	9.01059	NA	NA	NA	NA	NA	NA	0.247796
Brain	Rian	-4.88215	NA	NA	NA	NA	NA	NA	NA	-1	NA	NA	NA	NA	NA	NA	NA	0.000304539	NA	NA	NA	NA	NA	NA	NA	NA	NA	NA	NA	NA	NA	NA	0.247708
Brain	Gm28673	-0.155796	NA	NA	NA	NA	NA	NA	NA	-1	NA	NA	NA	NA	NA	NA	NA	0.0710004	NA	NA	NA	NA	NA	NA	NA	NA	NA	NA	NA	NA	NA	NA	0.247693
Brain	9530059O14Rik	-4.49562	NA	NA	NA	NA	NA	NA	NA	-1	NA	NA	NA	NA	NA	NA	NA	0.00987564	NA	NA	NA	NA	NA	NA	NA	NA	NA	NA	NA	NA	NA	NA	0.247624
Brain	Gm43889	-1.70556	NA	NA	NA	NA	NA	NA	NA	-1	NA	NA	NA	NA	NA	NA	NA	0.000199712	NA	NA	NA	NA	NA	NA	NA	NA	NA	NA	NA	NA	NA	NA	0.247608
Brain	Gm33378	2.0367	-0.76487	NA	NA	NA	NA	NA	NA	0	-1	NA	NA	NA	NA	NA	NA	0.17389	0.0802913	NA	NA	NA	NA	NA	NA	8.68504	NA	NA	NA	NA	NA	NA	0.247491
Brain	Rasa4	2.52769	NA	NA	NA	NA	NA	NA	NA	1	NA	NA	NA	NA	NA	NA	NA	0.000192566	NA	NA	NA	NA	NA	NA	NA	NA	NA	NA	NA	NA	NA	NA	0.247314
Brain	Ubxn2b	-4.01507	NA	NA	NA	NA	NA	NA	NA	-1	NA	NA	NA	NA	NA	NA	NA	0.00674538	NA	NA	NA	NA	NA	NA	NA	NA	NA	NA	NA	NA	NA	NA	0.247264
Brain	1700019D03Rik	209.4	-1.9421	NA	NA	NA	NA	NA	NA	0	-1	NA	NA	NA	NA	NA	NA	0.257911	0.0813822	NA	NA	NA	NA	NA	NA	3.18727	NA	NA	NA	NA	NA	NA	0.247198
Brain	Prss50	0.518983	NA	NA	NA	NA	NA	NA	NA	1	NA	NA	NA	NA	NA	NA	NA	0.000337199	NA	NA	NA	NA	NA	NA	NA	NA	NA	NA	NA	NA	NA	NA	0.247012
Brain	Shc1	1.94368	NA	NA	NA	NA	NA	NA	NA	1	NA	NA	NA	NA	NA	NA	NA	0.00123183	NA	NA	NA	NA	NA	NA	NA	NA	NA	NA	NA	NA	NA	NA	0.246782
Brain	Rgs7bp	-16.4997	NA	NA	NA	NA	NA	NA	NA	-1	NA	NA	NA	NA	NA	NA	NA	0.000333332	NA	NA	NA	NA	NA	NA	NA	NA	NA	NA	NA	NA	NA	NA	0.246701
Brain	Tjp2	4.35447	NA	NA	NA	NA	NA	NA	NA	1	NA	NA	NA	NA	NA	NA	NA	0.000194054	NA	NA	NA	NA	NA	NA	NA	NA	NA	NA	NA	NA	NA	NA	0.246492
Brain	Gm6627	0.51075	NA	NA	NA	NA	NA	NA	NA	1	NA	NA	NA	NA	NA	NA	NA	0.00030459	NA	NA	NA	NA	NA	NA	NA	NA	NA	NA	NA	NA	NA	NA	0.246124
Brain	Arpp19	-15.1692	NA	NA	NA	NA	NA	NA	NA	-1	NA	NA	NA	NA	NA	NA	NA	0.0015161	NA	NA	NA	NA	NA	NA	NA	NA	NA	NA	NA	NA	NA	NA	0.246015
Brain	Scamp2	2.01858	NA	NA	NA	NA	NA	NA	NA	1	NA	NA	NA	NA	NA	NA	NA	0.000874073	NA	NA	NA	NA	NA	NA	NA	NA	NA	NA	NA	NA	NA	NA	0.24585
Brain	Rxfp1	1.5546	-4476.1	NA	NA	NA	NA	NA	NA	1	0	NA	NA	NA	NA	NA	NA	0.0996572	0.1866	NA	NA	NA	NA	NA	NA	26.9647	NA	NA	NA	NA	NA	NA	0.245599
Brain	Foxp1	-19.308	10.85	NA	NA	NA	NA	NA	NA	-1	0	NA	NA	NA	NA	NA	NA	0.0868881	0.129628	NA	NA	NA	NA	NA	NA	12.5823	NA	NA	NA	NA	NA	NA	0.245354
Brain	Syndig1	-6.54416	NA	NA	NA	NA	NA	NA	NA	-1	NA	NA	NA	NA	NA	NA	NA	0.000433971	NA	NA	NA	NA	NA	NA	NA	NA	NA	NA	NA	NA	NA	NA	0.245236
Brain	Sox10	10.1762	NA	NA	NA	NA	NA	NA	NA	1	NA	NA	NA	NA	NA	NA	NA	0.000338342	NA	NA	NA	NA	NA	NA	NA	NA	NA	NA	NA	NA	NA	NA	0.245082
Brain	Gm22005	-0.17172	193.69	-1.5741	NA	NA	NA	NA	NA	0	0	-1	NA	NA	NA	NA	NA	0.241754	0.225087	0.0885951	NA	NA	NA	NA	NA	18.003	18.0535	NA	NA	NA	NA	NA	0.245078
Brain	Pdhx	-4.1448	NA	NA	NA	NA	NA	NA	NA	-1	NA	NA	NA	NA	NA	NA	NA	0.000195537	NA	NA	NA	NA	NA	NA	NA	NA	NA	NA	NA	NA	NA	NA	0.244906
Brain	Kcnd2	-8.85341	NA	NA	NA	NA	NA	NA	NA	-1	NA	NA	NA	NA	NA	NA	NA	0.000975131	NA	NA	NA	NA	NA	NA	NA	NA	NA	NA	NA	NA	NA	NA	0.244724
Brain	Stat6	2.69421	NA	NA	NA	NA	NA	NA	NA	1	NA	NA	NA	NA	NA	NA	NA	0.000198855	NA	NA	NA	NA	NA	NA	NA	NA	NA	NA	NA	NA	NA	NA	0.244703
Brain	Bicd1	-7.83988	NA	NA	NA	NA	NA	NA	NA	-1	NA	NA	NA	NA	NA	NA	NA	0.000406523	NA	NA	NA	NA	NA	NA	NA	NA	NA	NA	NA	NA	NA	NA	0.24432
Brain	Frmd8	5.27157	NA	NA	NA	NA	NA	NA	NA	1	NA	NA	NA	NA	NA	NA	NA	0.00020346	NA	NA	NA	NA	NA	NA	NA	NA	NA	NA	NA	NA	NA	NA	0.244234
Brain	H2-Eb1	0.844196	NA	NA	NA	NA	NA	NA	NA	1	NA	NA	NA	NA	NA	NA	NA	0.000252214	NA	NA	NA	NA	NA	NA	NA	NA	NA	NA	NA	NA	NA	NA	0.24382
Brain	Sp100	1.23764	NA	NA	NA	NA	NA	NA	NA	1	NA	NA	NA	NA	NA	NA	NA	0.000213965	NA	NA	NA	NA	NA	NA	NA	NA	NA	NA	NA	NA	NA	NA	0.243719
Brain	Ptgdr	0.55535	-33.464	NA	NA	NA	NA	NA	NA	1	0	NA	NA	NA	NA	NA	NA	0.0833557	0.48789	NA	NA	NA	NA	NA	NA	26.5779	NA	NA	NA	NA	NA	NA	0.243614
Brain	M5C1000I18Rik	-1.1933	2946.3	NA	NA	NA	NA	NA	NA	-1	0	NA	NA	NA	NA	NA	NA	0.0821983	0.179367	NA	NA	NA	NA	NA	NA	26.9674	NA	NA	NA	NA	NA	NA	0.243299
Brain	Gm8679	-0.233533	NA	NA	NA	NA	NA	NA	NA	-1	NA	NA	NA	NA	NA	NA	NA	0.000206333	NA	NA	NA	NA	NA	NA	NA	NA	NA	NA	NA	NA	NA	NA	0.243279
Brain	Thnsl1	-3.6623	87.702	NA	NA	NA	NA	NA	NA	-1	0	NA	NA	NA	NA	NA	NA	0.0787753	0.461577	NA	NA	NA	NA	NA	NA	26.0476	NA	NA	NA	NA	NA	NA	0.242895
Brain	Sirt2	-34.615	17.186	NA	NA	NA	NA	NA	NA	0	1	NA	NA	NA	NA	NA	NA	0.11732	0.0918401	NA	NA	NA	NA	NA	NA	10.3141	NA	NA	NA	NA	NA	NA	0.242707
Brain	Dusp18	-2.08786	NA	NA	NA	NA	NA	NA	NA	-1	NA	NA	NA	NA	NA	NA	NA	0.00490428	NA	NA	NA	NA	NA	NA	NA	NA	NA	NA	NA	NA	NA	NA	0.242092
Brain	Arntl	-4.88867	NA	NA	NA	NA	NA	NA	NA	-1	NA	NA	NA	NA	NA	NA	NA	0.00134643	NA	NA	NA	NA	NA	NA	NA	NA	NA	NA	NA	NA	NA	NA	0.241925
Brain	Bdp1	-3.25442	NA	NA	NA	NA	NA	NA	NA	-1	NA	NA	NA	NA	NA	NA	NA	0.000320594	NA	NA	NA	NA	NA	NA	NA	NA	NA	NA	NA	NA	NA	NA	0.241601
Brain	Nkapd1	-1.69339	NA	NA	NA	NA	NA	NA	NA	-1	NA	NA	NA	NA	NA	NA	NA	0.000217096	NA	NA	NA	NA	NA	NA	NA	NA	NA	NA	NA	NA	NA	NA	0.241601
Brain	Med18	1.0078	NA	NA	NA	NA	NA	NA	NA	1	NA	NA	NA	NA	NA	NA	NA	0.000362631	NA	NA	NA	NA	NA	NA	NA	NA	NA	NA	NA	NA	NA	NA	0.241441
Brain	Apobec1	1.00062	NA	NA	NA	NA	NA	NA	NA	1	NA	NA	NA	NA	NA	NA	NA	0.000219968	NA	NA	NA	NA	NA	NA	NA	NA	NA	NA	NA	NA	NA	NA	0.240922
Brain	Lztfl1	-4.43626	NA	NA	NA	NA	NA	NA	NA	-1	NA	NA	NA	NA	NA	NA	NA	0.000677757	NA	NA	NA	NA	NA	NA	NA	NA	NA	NA	NA	NA	NA	NA	0.240429
Brain	Ammecr1	-0.786812	NA	NA	NA	NA	NA	NA	NA	-1	NA	NA	NA	NA	NA	NA	NA	0.0121528	NA	NA	NA	NA	NA	NA	NA	NA	NA	NA	NA	NA	NA	NA	0.240191
Brain	Gm44677	-0.995589	NA	NA	NA	NA	NA	NA	NA	-1	NA	NA	NA	NA	NA	NA	NA	0.0261188	NA	NA	NA	NA	NA	NA	NA	NA	NA	NA	NA	NA	NA	NA	0.239804
Brain	Slc47a1	1.76671	NA	NA	NA	NA	NA	NA	NA	1	NA	NA	NA	NA	NA	NA	NA	0.000260705	NA	NA	NA	NA	NA	NA	NA	NA	NA	NA	NA	NA	NA	NA	0.239645
Brain	Tdg	-3.03082	NA	NA	NA	NA	NA	NA	NA	-1	NA	NA	NA	NA	NA	NA	NA	0.00040296	NA	NA	NA	NA	NA	NA	NA	NA	NA	NA	NA	NA	NA	NA	0.23954
Brain	Slc13a4	4.92561	NA	NA	NA	NA	NA	NA	NA	1	NA	NA	NA	NA	NA	NA	NA	0.000250612	NA	NA	NA	NA	NA	NA	NA	NA	NA	NA	NA	NA	NA	NA	0.239503
Brain	Fat2	-11.9486	NA	NA	NA	NA	NA	NA	NA	-1	NA	NA	NA	NA	NA	NA	NA	0.000236269	NA	NA	NA	NA	NA	NA	NA	NA	NA	NA	NA	NA	NA	NA	0.238848
Brain	Jakmip2	-4.6285	9897.9	NA	NA	NA	NA	NA	NA	-1	0	NA	NA	NA	NA	NA	NA	0.0874539	0.210562	NA	NA	NA	NA	NA	NA	26.963	NA	NA	NA	NA	NA	NA	0.238777
Brain	Spred3	-1.92715	NA	NA	NA	NA	NA	NA	NA	-1	NA	NA	NA	NA	NA	NA	NA	0.00543637	NA	NA	NA	NA	NA	NA	NA	NA	NA	NA	NA	NA	NA	NA	0.238427
Brain	Gm36501	0.371578	NA	NA	NA	NA	NA	NA	NA	1	NA	NA	NA	NA	NA	NA	NA	0.000501098	NA	NA	NA	NA	NA	NA	NA	NA	NA	NA	NA	NA	NA	NA	0.238316
Brain	Tifab	0.586105	NA	NA	NA	NA	NA	NA	NA	1	NA	NA	NA	NA	NA	NA	NA	0.00647162	NA	NA	NA	NA	NA	NA	NA	NA	NA	NA	NA	NA	NA	NA	0.238302
Brain	Phf20l1	-6.17903	NA	NA	NA	NA	NA	NA	NA	-1	NA	NA	NA	NA	NA	NA	NA	0.000243092	NA	NA	NA	NA	NA	NA	NA	NA	NA	NA	NA	NA	NA	NA	0.237755
Brain	Grn	7.9855	NA	NA	NA	NA	NA	NA	NA	1	NA	NA	NA	NA	NA	NA	NA	0.00024243	NA	NA	NA	NA	NA	NA	NA	NA	NA	NA	NA	NA	NA	NA	0.237748
Brain	Gm14999	0.103468	NA	NA	NA	NA	NA	NA	NA	1	NA	NA	NA	NA	NA	NA	NA	0.0634017	NA	NA	NA	NA	NA	NA	NA	NA	NA	NA	NA	NA	NA	NA	0.237633
Brain	P2ry10	0.215552	NA	NA	NA	NA	NA	NA	NA	1	NA	NA	NA	NA	NA	NA	NA	0.0116137	NA	NA	NA	NA	NA	NA	NA	NA	NA	NA	NA	NA	NA	NA	0.23707
Brain	Lgi1	-6.33221	NA	NA	NA	NA	NA	NA	NA	-1	NA	NA	NA	NA	NA	NA	NA	0.00067005	NA	NA	NA	NA	NA	NA	NA	NA	NA	NA	NA	NA	NA	NA	0.237008
Brain	Otub2	-3.49368	NA	NA	NA	NA	NA	NA	NA	-1	NA	NA	NA	NA	NA	NA	NA	0.00976331	NA	NA	NA	NA	NA	NA	NA	NA	NA	NA	NA	NA	NA	NA	0.236934
Brain	Gm20821	-0.183471	NA	NA	NA	NA	NA	NA	NA	-1	NA	NA	NA	NA	NA	NA	NA	0.0404718	NA	NA	NA	NA	NA	NA	NA	NA	NA	NA	NA	NA	NA	NA	0.236887
Brain	Papola	-10.1238	NA	NA	NA	NA	NA	NA	NA	-1	NA	NA	NA	NA	NA	NA	NA	0.00131618	NA	NA	NA	NA	NA	NA	NA	NA	NA	NA	NA	NA	NA	NA	0.236842
Brain	Rhot1	-8.38502	NA	NA	NA	NA	NA	NA	NA	-1	NA	NA	NA	NA	NA	NA	NA	0.000307288	NA	NA	NA	NA	NA	NA	NA	NA	NA	NA	NA	NA	NA	NA	0.236834
Brain	Emp3	0.731377	NA	NA	NA	NA	NA	NA	NA	1	NA	NA	NA	NA	NA	NA	NA	0.000260209	NA	NA	NA	NA	NA	NA	NA	NA	NA	NA	NA	NA	NA	NA	0.236798
Brain	Parp4	1.71476	NA	NA	NA	NA	NA	NA	NA	1	NA	NA	NA	NA	NA	NA	NA	0.000278546	NA	NA	NA	NA	NA	NA	NA	NA	NA	NA	NA	NA	NA	NA	0.236344
Brain	Cx3cl1	-78.6421	NA	NA	NA	NA	NA	NA	NA	-1	NA	NA	NA	NA	NA	NA	NA	0.000340333	NA	NA	NA	NA	NA	NA	NA	NA	NA	NA	NA	NA	NA	NA	0.236221
Brain	Tns2	5.0519	NA	NA	NA	NA	NA	NA	NA	1	NA	NA	NA	NA	NA	NA	NA	0.000272291	NA	NA	NA	NA	NA	NA	NA	NA	NA	NA	NA	NA	NA	NA	0.236152
Brain	Gstt3	1.55191	NA	NA	NA	NA	NA	NA	NA	1	NA	NA	NA	NA	NA	NA	NA	0.000475996	NA	NA	NA	NA	NA	NA	NA	NA	NA	NA	NA	NA	NA	NA	0.235947
Brain	Cacna1e	-10.8864	NA	NA	NA	NA	NA	NA	NA	-1	NA	NA	NA	NA	NA	NA	NA	0.00245263	NA	NA	NA	NA	NA	NA	NA	NA	NA	NA	NA	NA	NA	NA	0.235827
Brain	Bcas1	22.0951	NA	NA	NA	NA	NA	NA	NA	1	NA	NA	NA	NA	NA	NA	NA	0.000398717	NA	NA	NA	NA	NA	NA	NA	NA	NA	NA	NA	NA	NA	NA	0.23561
Brain	Gm44200	-0.287176	NA	NA	NA	NA	NA	NA	NA	-1	NA	NA	NA	NA	NA	NA	NA	0.0167946	NA	NA	NA	NA	NA	NA	NA	NA	NA	NA	NA	NA	NA	NA	0.235593
Brain	Col6a1	7.34197	NA	NA	NA	NA	NA	NA	NA	1	NA	NA	NA	NA	NA	NA	NA	0.000342448	NA	NA	NA	NA	NA	NA	NA	NA	NA	NA	NA	NA	NA	NA	0.235375
Brain	Itih5	3.26828	NA	NA	NA	NA	NA	NA	NA	1	NA	NA	NA	NA	NA	NA	NA	0.000830773	NA	NA	NA	NA	NA	NA	NA	NA	NA	NA	NA	NA	NA	NA	0.235147
Brain	Pmp22	7.54281	NA	NA	NA	NA	NA	NA	NA	1	NA	NA	NA	NA	NA	NA	NA	0.000272926	NA	NA	NA	NA	NA	NA	NA	NA	NA	NA	NA	NA	NA	NA	0.235018
Brain	Olfr527	1.189	-1.7065	NA	NA	NA	NA	NA	NA	1	0	NA	NA	NA	NA	NA	NA	0.0920028	0.160399	NA	NA	NA	NA	NA	NA	18.0426	NA	NA	NA	NA	NA	NA	0.234844
Brain	Pltp	-2530.1	11.653	NA	NA	NA	NA	NA	NA	0	1	NA	NA	NA	NA	NA	NA	0.240567	0.0776993	NA	NA	NA	NA	NA	NA	3.04368	NA	NA	NA	NA	NA	NA	0.234589
Brain	Sec14l5	3.73879	NA	NA	NA	NA	NA	NA	NA	1	NA	NA	NA	NA	NA	NA	NA	0.000298653	NA	NA	NA	NA	NA	NA	NA	NA	NA	NA	NA	NA	NA	NA	0.234325
Brain	Fam20a	-2.17236	NA	NA	NA	NA	NA	NA	NA	-1	NA	NA	NA	NA	NA	NA	NA	0.000761981	NA	NA	NA	NA	NA	NA	NA	NA	NA	NA	NA	NA	NA	NA	0.234003
Brain	Mgat4c	-2.0581	NA	NA	NA	NA	NA	NA	NA	-1	NA	NA	NA	NA	NA	NA	NA	0.000284833	NA	NA	NA	NA	NA	NA	NA	NA	NA	NA	NA	NA	NA	NA	0.232613
Brain	Ppp1r12a	-7.4252	NA	NA	NA	NA	NA	NA	NA	-1	NA	NA	NA	NA	NA	NA	NA	0.00304265	NA	NA	NA	NA	NA	NA	NA	NA	NA	NA	NA	NA	NA	NA	0.232496
Brain	Pknox2	3.5593	-735.92	43.111	NA	NA	NA	NA	NA	0	0	1	NA	NA	NA	NA	NA	0.132222	0.269526	0.0872878	NA	NA	NA	NA	NA	20.9212	21.2348	NA	NA	NA	NA	NA	0.232479
Brain	Nkain2	-13.267	22.143	-2.7531	NA	NA	NA	NA	NA	-1	0	0	NA	NA	NA	NA	NA	0.0776361	0.485785	0.177906	NA	NA	NA	NA	NA	9.34721	12.31	NA	NA	NA	NA	NA	0.232327
Brain	Epb41l2	3.63139	NA	NA	NA	NA	NA	NA	NA	1	NA	NA	NA	NA	NA	NA	NA	0.00218883	NA	NA	NA	NA	NA	NA	NA	NA	NA	NA	NA	NA	NA	NA	0.232228
Brain	Pdlim4	1.52618	NA	NA	NA	NA	NA	NA	NA	1	NA	NA	NA	NA	NA	NA	NA	0.000401904	NA	NA	NA	NA	NA	NA	NA	NA	NA	NA	NA	NA	NA	NA	0.232182
Brain	Ankrd29	-2.72793	NA	NA	NA	NA	NA	NA	NA	-1	NA	NA	NA	NA	NA	NA	NA	0.000324515	NA	NA	NA	NA	NA	NA	NA	NA	NA	NA	NA	NA	NA	NA	0.232161
Brain	H2-K2	0.926661	NA	NA	NA	NA	NA	NA	NA	1	NA	NA	NA	NA	NA	NA	NA	0.000608144	NA	NA	NA	NA	NA	NA	NA	NA	NA	NA	NA	NA	NA	NA	0.231921
Brain	Calr	-27.1086	NA	NA	NA	NA	NA	NA	NA	-1	NA	NA	NA	NA	NA	NA	NA	0.000565551	NA	NA	NA	NA	NA	NA	NA	NA	NA	NA	NA	NA	NA	NA	0.231773
Brain	Igtp	1.33402	NA	NA	NA	NA	NA	NA	NA	1	NA	NA	NA	NA	NA	NA	NA	0.000491761	NA	NA	NA	NA	NA	NA	NA	NA	NA	NA	NA	NA	NA	NA	0.231451
Brain	Tmem144	1.82417	NA	NA	NA	NA	NA	NA	NA	1	NA	NA	NA	NA	NA	NA	NA	0.000333177	NA	NA	NA	NA	NA	NA	NA	NA	NA	NA	NA	NA	NA	NA	0.231388
Brain	Cox8b	0.164584	NA	NA	NA	NA	NA	NA	NA	1	NA	NA	NA	NA	NA	NA	NA	0.0197994	NA	NA	NA	NA	NA	NA	NA	NA	NA	NA	NA	NA	NA	NA	0.231379
Brain	AU040972	0.7453	-1.6684	NA	NA	NA	NA	NA	NA	0	-1	NA	NA	NA	NA	NA	NA	0.115733	0.0982514	NA	NA	NA	NA	NA	NA	17.9572	NA	NA	NA	NA	NA	NA	0.231034
Brain	Gm38394	2.0661	-164.5	0.36873	NA	NA	NA	NA	NA	1	0	0	NA	NA	NA	NA	NA	0.0896058	0.174909	0.213848	NA	NA	NA	NA	NA	11.9276	12.0314	NA	NA	NA	NA	NA	0.230763
Brain	Sun2	5.23453	NA	NA	NA	NA	NA	NA	NA	1	NA	NA	NA	NA	NA	NA	NA	0.000321948	NA	NA	NA	NA	NA	NA	NA	NA	NA	NA	NA	NA	NA	NA	0.230162
Brain	Tgfbr2	3.64616	NA	NA	NA	NA	NA	NA	NA	1	NA	NA	NA	NA	NA	NA	NA	0.000303953	NA	NA	NA	NA	NA	NA	NA	NA	NA	NA	NA	NA	NA	NA	0.230104
Brain	Cmc4	345.23	-0.66296	NA	NA	NA	NA	NA	NA	0	-1	NA	NA	NA	NA	NA	NA	0.150099	0.092549	NA	NA	NA	NA	NA	NA	3.01092	NA	NA	NA	NA	NA	NA	0.230059
Brain	Nrsn1	-21.1497	NA	NA	NA	NA	NA	NA	NA	-1	NA	NA	NA	NA	NA	NA	NA	0.00187485	NA	NA	NA	NA	NA	NA	NA	NA	NA	NA	NA	NA	NA	NA	0.229921
Brain	Cd22	0.486477	NA	NA	NA	NA	NA	NA	NA	1	NA	NA	NA	NA	NA	NA	NA	0.000380245	NA	NA	NA	NA	NA	NA	NA	NA	NA	NA	NA	NA	NA	NA	0.229788
Brain	Ptgds	192.236	NA	NA	NA	NA	NA	NA	NA	1	NA	NA	NA	NA	NA	NA	NA	0.000621301	NA	NA	NA	NA	NA	NA	NA	NA	NA	NA	NA	NA	NA	NA	0.229507
Brain	1700095J03Rik	0.48418	-2.7731	NA	NA	NA	NA	NA	NA	1	0	NA	NA	NA	NA	NA	NA	0.0926563	0.14738	NA	NA	NA	NA	NA	NA	23.0417	NA	NA	NA	NA	NA	NA	0.229306
Brain	Arpin	1.82403	NA	NA	NA	NA	NA	NA	NA	1	NA	NA	NA	NA	NA	NA	NA	0.000726421	NA	NA	NA	NA	NA	NA	NA	NA	NA	NA	NA	NA	NA	NA	0.229184
Brain	Tmem176b	4.20917	NA	NA	NA	NA	NA	NA	NA	1	NA	NA	NA	NA	NA	NA	NA	0.000705012	NA	NA	NA	NA	NA	NA	NA	NA	NA	NA	NA	NA	NA	NA	0.228941
Brain	Ogn	2.17741	NA	NA	NA	NA	NA	NA	NA	1	NA	NA	NA	NA	NA	NA	NA	0.000564738	NA	NA	NA	NA	NA	NA	NA	NA	NA	NA	NA	NA	NA	NA	0.228893
Brain	Selplg	3.0702	NA	NA	NA	NA	NA	NA	NA	1	NA	NA	NA	NA	NA	NA	NA	0.000850694	NA	NA	NA	NA	NA	NA	NA	NA	NA	NA	NA	NA	NA	NA	0.228889
Brain	Fbln5	3.33283	NA	NA	NA	NA	NA	NA	NA	1	NA	NA	NA	NA	NA	NA	NA	0.00033541	NA	NA	NA	NA	NA	NA	NA	NA	NA	NA	NA	NA	NA	NA	0.228546
Brain	Coch	-2.75488	NA	NA	NA	NA	NA	NA	NA	-1	NA	NA	NA	NA	NA	NA	NA	0.000562971	NA	NA	NA	NA	NA	NA	NA	NA	NA	NA	NA	NA	NA	NA	0.228407
Brain	Ptp4a1	-6.29895	NA	NA	NA	NA	NA	NA	NA	-1	NA	NA	NA	NA	NA	NA	NA	0.000732485	NA	NA	NA	NA	NA	NA	NA	NA	NA	NA	NA	NA	NA	NA	0.2284
Brain	Grm4	-11.7457	NA	NA	NA	NA	NA	NA	NA	-1	NA	NA	NA	NA	NA	NA	NA	0.000334905	NA	NA	NA	NA	NA	NA	NA	NA	NA	NA	NA	NA	NA	NA	0.228334
Brain	Ralgapa1	-4.66368	NA	NA	NA	NA	NA	NA	NA	-1	NA	NA	NA	NA	NA	NA	NA	0.00955348	NA	NA	NA	NA	NA	NA	NA	NA	NA	NA	NA	NA	NA	NA	0.228166
Brain	Hcar2	0.302726	NA	NA	NA	NA	NA	NA	NA	1	NA	NA	NA	NA	NA	NA	NA	0.000647511	NA	NA	NA	NA	NA	NA	NA	NA	NA	NA	NA	NA	NA	NA	0.228068
Brain	Tsga10	-2.66541	NA	NA	NA	NA	NA	NA	NA	-1	NA	NA	NA	NA	NA	NA	NA	0.000559391	NA	NA	NA	NA	NA	NA	NA	NA	NA	NA	NA	NA	NA	NA	0.227953
Brain	Myh7	-1.21951	NA	NA	NA	NA	NA	NA	NA	-1	NA	NA	NA	NA	NA	NA	NA	0.0254425	NA	NA	NA	NA	NA	NA	NA	NA	NA	NA	NA	NA	NA	NA	0.227048
Brain	Slc6a6	-40.481	23.368	NA	NA	NA	NA	NA	NA	0	1	NA	NA	NA	NA	NA	NA	0.136446	0.0933748	NA	NA	NA	NA	NA	NA	9.4899	NA	NA	NA	NA	NA	NA	0.226895
Brain	Ythdc2	-2.3977	NA	NA	NA	NA	NA	NA	NA	-1	NA	NA	NA	NA	NA	NA	NA	0.000434242	NA	NA	NA	NA	NA	NA	NA	NA	NA	NA	NA	NA	NA	NA	0.226583
Brain	Pcmtd2	-5.89817	NA	NA	NA	NA	NA	NA	NA	-1	NA	NA	NA	NA	NA	NA	NA	0.000920348	NA	NA	NA	NA	NA	NA	NA	NA	NA	NA	NA	NA	NA	NA	0.226366
Brain	Dhdh	1.75531	NA	NA	NA	NA	NA	NA	NA	1	NA	NA	NA	NA	NA	NA	NA	0.000373488	NA	NA	NA	NA	NA	NA	NA	NA	NA	NA	NA	NA	NA	NA	0.226319
Brain	Ftl1	29.2807	NA	NA	NA	NA	NA	NA	NA	1	NA	NA	NA	NA	NA	NA	NA	0.000599978	NA	NA	NA	NA	NA	NA	NA	NA	NA	NA	NA	NA	NA	NA	0.226201
Brain	Rapgef5	4.5601	-23.901	NA	NA	NA	NA	NA	NA	0	-1	NA	NA	NA	NA	NA	NA	0.238603	0.0914577	NA	NA	NA	NA	NA	NA	17.6604	NA	NA	NA	NA	NA	NA	0.225861
Brain	Ncf1	1.36993	NA	NA	NA	NA	NA	NA	NA	1	NA	NA	NA	NA	NA	NA	NA	0.00042942	NA	NA	NA	NA	NA	NA	NA	NA	NA	NA	NA	NA	NA	NA	0.225853
Brain	Aga	1.20427	NA	NA	NA	NA	NA	NA	NA	1	NA	NA	NA	NA	NA	NA	NA	0.000704771	NA	NA	NA	NA	NA	NA	NA	NA	NA	NA	NA	NA	NA	NA	0.22546
Brain	Pcdhga3	1.94593	NA	NA	NA	NA	NA	NA	NA	1	NA	NA	NA	NA	NA	NA	NA	0.000357821	NA	NA	NA	NA	NA	NA	NA	NA	NA	NA	NA	NA	NA	NA	0.225419
Brain	Calca	23.601	-669.63	0.054059	NA	NA	NA	NA	NA	1	0	0	NA	NA	NA	NA	NA	0.0901246	0.182681	0.469792	NA	NA	NA	NA	NA	5.95949	6.05591	NA	NA	NA	NA	NA	0.225379
Brain	F11r	1.61781	NA	NA	NA	NA	NA	NA	NA	1	NA	NA	NA	NA	NA	NA	NA	0.000428744	NA	NA	NA	NA	NA	NA	NA	NA	NA	NA	NA	NA	NA	NA	0.224531
Brain	Far1	-7.18472	NA	NA	NA	NA	NA	NA	NA	-1	NA	NA	NA	NA	NA	NA	NA	0.00287492	NA	NA	NA	NA	NA	NA	NA	NA	NA	NA	NA	NA	NA	NA	0.224487
Brain	Thsd7a	-3.17985	NA	NA	NA	NA	NA	NA	NA	-1	NA	NA	NA	NA	NA	NA	NA	0.0116831	NA	NA	NA	NA	NA	NA	NA	NA	NA	NA	NA	NA	NA	NA	0.223932
Brain	Lair1	1.65487	NA	NA	NA	NA	NA	NA	NA	1	NA	NA	NA	NA	NA	NA	NA	0.00189978	NA	NA	NA	NA	NA	NA	NA	NA	NA	NA	NA	NA	NA	NA	0.223915
Brain	Syt13	-16.859	NA	NA	NA	NA	NA	NA	NA	-1	NA	NA	NA	NA	NA	NA	NA	0.00117735	NA	NA	NA	NA	NA	NA	NA	NA	NA	NA	NA	NA	NA	NA	0.223664
Brain	Slamf9	0.306652	NA	NA	NA	NA	NA	NA	NA	1	NA	NA	NA	NA	NA	NA	NA	0.0305045	NA	NA	NA	NA	NA	NA	NA	NA	NA	NA	NA	NA	NA	NA	0.223579
Brain	Il16	-6.50826	NA	NA	NA	NA	NA	NA	NA	-1	NA	NA	NA	NA	NA	NA	NA	0.00041764	NA	NA	NA	NA	NA	NA	NA	NA	NA	NA	NA	NA	NA	NA	0.223294
Brain	Ccdc28b	-1.54705	NA	NA	NA	NA	NA	NA	NA	-1	NA	NA	NA	NA	NA	NA	NA	0.026536	NA	NA	NA	NA	NA	NA	NA	NA	NA	NA	NA	NA	NA	NA	0.223129
Brain	Vgll2	0.42958	-0.4249	NA	NA	NA	NA	NA	NA	1	0	NA	NA	NA	NA	NA	NA	0.0973258	0.154602	NA	NA	NA	NA	NA	NA	16.4745	NA	NA	NA	NA	NA	NA	0.22307
Brain	Rasgrf1	35.715	NA	NA	NA	NA	NA	NA	NA	1	NA	NA	NA	NA	NA	NA	NA	0.000459553	NA	NA	NA	NA	NA	NA	NA	NA	NA	NA	NA	NA	NA	NA	0.222909
Brain	Cxcl5	0.422077	NA	NA	NA	NA	NA	NA	NA	1	NA	NA	NA	NA	NA	NA	NA	0.00123139	NA	NA	NA	NA	NA	NA	NA	NA	NA	NA	NA	NA	NA	NA	0.222852
Brain	Hpcal4	-47.6766	NA	NA	NA	NA	NA	NA	NA	-1	NA	NA	NA	NA	NA	NA	NA	0.00209875	NA	NA	NA	NA	NA	NA	NA	NA	NA	NA	NA	NA	NA	NA	0.222645
Brain	BC003965	-3.2102	35.736	NA	NA	NA	NA	NA	NA	-1	0	NA	NA	NA	NA	NA	NA	0.0903962	0.497945	NA	NA	NA	NA	NA	NA	24.4164	NA	NA	NA	NA	NA	NA	0.222378
Brain	Tirap	1.13256	NA	NA	NA	NA	NA	NA	NA	1	NA	NA	NA	NA	NA	NA	NA	0.000745195	NA	NA	NA	NA	NA	NA	NA	NA	NA	NA	NA	NA	NA	NA	0.222312
Brain	Gm29158	-0.118406	NA	NA	NA	NA	NA	NA	NA	-1	NA	NA	NA	NA	NA	NA	NA	0.0822704	NA	NA	NA	NA	NA	NA	NA	NA	NA	NA	NA	NA	NA	NA	0.222302
Brain	Hspa1a	10.654	-5.3348	NA	NA	NA	NA	NA	NA	0	-1	NA	NA	NA	NA	NA	NA	0.12522	0.0976876	NA	NA	NA	NA	NA	NA	9.52797	NA	NA	NA	NA	NA	NA	0.222283
Brain	Nlrc5	1.19396	NA	NA	NA	NA	NA	NA	NA	1	NA	NA	NA	NA	NA	NA	NA	0.000410137	NA	NA	NA	NA	NA	NA	NA	NA	NA	NA	NA	NA	NA	NA	0.222226
Brain	Hspg2	1.70572	NA	NA	NA	NA	NA	NA	NA	1	NA	NA	NA	NA	NA	NA	NA	0.000845644	NA	NA	NA	NA	NA	NA	NA	NA	NA	NA	NA	NA	NA	NA	0.222081
Brain	Ano1	1.59683	NA	NA	NA	NA	NA	NA	NA	1	NA	NA	NA	NA	NA	NA	NA	0.000399687	NA	NA	NA	NA	NA	NA	NA	NA	NA	NA	NA	NA	NA	NA	0.222073
Brain	Gigyf2	-3.48929	NA	NA	NA	NA	NA	NA	NA	-1	NA	NA	NA	NA	NA	NA	NA	0.000860973	NA	NA	NA	NA	NA	NA	NA	NA	NA	NA	NA	NA	NA	NA	0.222003
Brain	Lman2l	-5.12184	NA	NA	NA	NA	NA	NA	NA	-1	NA	NA	NA	NA	NA	NA	NA	0.000702641	NA	NA	NA	NA	NA	NA	NA	NA	NA	NA	NA	NA	NA	NA	0.221882
Brain	Gm14849	0.290558	NA	NA	NA	NA	NA	NA	NA	1	NA	NA	NA	NA	NA	NA	NA	0.00879685	NA	NA	NA	NA	NA	NA	NA	NA	NA	NA	NA	NA	NA	NA	0.221851
Brain	Azi2	-7.33168	NA	NA	NA	NA	NA	NA	NA	-1	NA	NA	NA	NA	NA	NA	NA	0.000461004	NA	NA	NA	NA	NA	NA	NA	NA	NA	NA	NA	NA	NA	NA	0.221443
Brain	Ier3	1.44397	NA	NA	NA	NA	NA	NA	NA	1	NA	NA	NA	NA	NA	NA	NA	0.00148088	NA	NA	NA	NA	NA	NA	NA	NA	NA	NA	NA	NA	NA	NA	0.221359
Brain	Ptpn18	0.643418	NA	NA	NA	NA	NA	NA	NA	1	NA	NA	NA	NA	NA	NA	NA	0.000820226	NA	NA	NA	NA	NA	NA	NA	NA	NA	NA	NA	NA	NA	NA	0.221232
Brain	Gm43617	1.2857	-0.23787	NA	NA	NA	NA	NA	NA	1	0	NA	NA	NA	NA	NA	NA	0.0960585	0.181942	NA	NA	NA	NA	NA	NA	9.32702	NA	NA	NA	NA	NA	NA	0.220873
Brain	Trim9	-30.861	NA	NA	NA	NA	NA	NA	NA	-1	NA	NA	NA	NA	NA	NA	NA	0.000642592	NA	NA	NA	NA	NA	NA	NA	NA	NA	NA	NA	NA	NA	NA	0.220839
Brain	Ints7	-4.15962	NA	NA	NA	NA	NA	NA	NA	-1	NA	NA	NA	NA	NA	NA	NA	0.00039854	NA	NA	NA	NA	NA	NA	NA	NA	NA	NA	NA	NA	NA	NA	0.220789
Brain	Ccdc186	-3.17601	NA	NA	NA	NA	NA	NA	NA	-1	NA	NA	NA	NA	NA	NA	NA	0.000786393	NA	NA	NA	NA	NA	NA	NA	NA	NA	NA	NA	NA	NA	NA	0.220651
Brain	Nhlrc1	-2.2106	11.304	NA	NA	NA	NA	NA	NA	-1	0	NA	NA	NA	NA	NA	NA	0.0953799	0.167022	NA	NA	NA	NA	NA	NA	23.1032	NA	NA	NA	NA	NA	NA	0.220643
Brain	Fpgt	-3.59578	NA	NA	NA	NA	NA	NA	NA	-1	NA	NA	NA	NA	NA	NA	NA	0.000528779	NA	NA	NA	NA	NA	NA	NA	NA	NA	NA	NA	NA	NA	NA	0.220594
Brain	Gm13905	0.512906	NA	NA	NA	NA	NA	NA	NA	1	NA	NA	NA	NA	NA	NA	NA	0.000404595	NA	NA	NA	NA	NA	NA	NA	NA	NA	NA	NA	NA	NA	NA	0.22058
Brain	Hadh	2.99772	NA	NA	NA	NA	NA	NA	NA	1	NA	NA	NA	NA	NA	NA	NA	0.00128548	NA	NA	NA	NA	NA	NA	NA	NA	NA	NA	NA	NA	NA	NA	0.220539
Brain	Cybb	1.1322	NA	NA	NA	NA	NA	NA	NA	1	NA	NA	NA	NA	NA	NA	NA	0.0217052	NA	NA	NA	NA	NA	NA	NA	NA	NA	NA	NA	NA	NA	NA	0.220537
Brain	Bcl3	0.579079	NA	NA	NA	NA	NA	NA	NA	1	NA	NA	NA	NA	NA	NA	NA	0.000441758	NA	NA	NA	NA	NA	NA	NA	NA	NA	NA	NA	NA	NA	NA	0.220436
Brain	Rbm41	-0.903742	NA	NA	NA	NA	NA	NA	NA	-1	NA	NA	NA	NA	NA	NA	NA	0.0258825	NA	NA	NA	NA	NA	NA	NA	NA	NA	NA	NA	NA	NA	NA	0.220211
Brain	Lrrc6	1.21882	NA	NA	NA	NA	NA	NA	NA	1	NA	NA	NA	NA	NA	NA	NA	0.000466161	NA	NA	NA	NA	NA	NA	NA	NA	NA	NA	NA	NA	NA	NA	0.219977
Brain	Igfn1	1.371	NA	NA	NA	NA	NA	NA	NA	1	NA	NA	NA	NA	NA	NA	NA	0.000433716	NA	NA	NA	NA	NA	NA	NA	NA	NA	NA	NA	NA	NA	NA	0.219945
Brain	Atxn7l3b	-8.43439	NA	NA	NA	NA	NA	NA	NA	-1	NA	NA	NA	NA	NA	NA	NA	0.000451791	NA	NA	NA	NA	NA	NA	NA	NA	NA	NA	NA	NA	NA	NA	0.219945
Brain	Tnfrsf11b	1.23584	NA	NA	NA	NA	NA	NA	NA	1	NA	NA	NA	NA	NA	NA	NA	0.00191345	NA	NA	NA	NA	NA	NA	NA	NA	NA	NA	NA	NA	NA	NA	0.219854
Brain	Pds5b	-5.27758	NA	NA	NA	NA	NA	NA	NA	-1	NA	NA	NA	NA	NA	NA	NA	0.000938828	NA	NA	NA	NA	NA	NA	NA	NA	NA	NA	NA	NA	NA	NA	0.219757
Brain	Ctnnbl1	964.47	-4.051	NA	NA	NA	NA	NA	NA	0	-1	NA	NA	NA	NA	NA	NA	0.171522	0.0842504	NA	NA	NA	NA	NA	NA	3.05306	NA	NA	NA	NA	NA	NA	0.219656
Brain	Slc22a18	0.483985	NA	NA	NA	NA	NA	NA	NA	1	NA	NA	NA	NA	NA	NA	NA	0.00118285	NA	NA	NA	NA	NA	NA	NA	NA	NA	NA	NA	NA	NA	NA	0.219476
Brain	L3mbtl3	-2.4078	NA	NA	NA	NA	NA	NA	NA	-1	NA	NA	NA	NA	NA	NA	NA	0.000533311	NA	NA	NA	NA	NA	NA	NA	NA	NA	NA	NA	NA	NA	NA	0.218909
Brain	H2-Aa	1.32362	NA	NA	NA	NA	NA	NA	NA	1	NA	NA	NA	NA	NA	NA	NA	0.000473204	NA	NA	NA	NA	NA	NA	NA	NA	NA	NA	NA	NA	NA	NA	0.218805
Brain	Snora43	-0.327356	NA	NA	NA	NA	NA	NA	NA	-1	NA	NA	NA	NA	NA	NA	NA	0.00122221	NA	NA	NA	NA	NA	NA	NA	NA	NA	NA	NA	NA	NA	NA	0.218569
Brain	Hmx2	0.249414	NA	NA	NA	NA	NA	NA	NA	1	NA	NA	NA	NA	NA	NA	NA	0.00469889	NA	NA	NA	NA	NA	NA	NA	NA	NA	NA	NA	NA	NA	NA	0.218401
Brain	C2cd5	-4.58715	NA	NA	NA	NA	NA	NA	NA	-1	NA	NA	NA	NA	NA	NA	NA	0.00593882	NA	NA	NA	NA	NA	NA	NA	NA	NA	NA	NA	NA	NA	NA	0.218385
Brain	Mei1	1.50995	NA	NA	NA	NA	NA	NA	NA	1	NA	NA	NA	NA	NA	NA	NA	0.000455815	NA	NA	NA	NA	NA	NA	NA	NA	NA	NA	NA	NA	NA	NA	0.218371
Brain	Gm13226	0.165138	NA	NA	NA	NA	NA	NA	NA	1	NA	NA	NA	NA	NA	NA	NA	0.00633476	NA	NA	NA	NA	NA	NA	NA	NA	NA	NA	NA	NA	NA	NA	0.218356
Brain	Gm15979	0.89016	-0.46189	NA	NA	NA	NA	NA	NA	0	-1	NA	NA	NA	NA	NA	NA	0.151484	0.0916498	NA	NA	NA	NA	NA	NA	9.0025	NA	NA	NA	NA	NA	NA	0.218222
Brain	Gfod2	-3.21095	NA	NA	NA	NA	NA	NA	NA	-1	NA	NA	NA	NA	NA	NA	NA	0.000563175	NA	NA	NA	NA	NA	NA	NA	NA	NA	NA	NA	NA	NA	NA	0.21821
Brain	1700084J12Rik	0.87424	-2.1573	NA	NA	NA	NA	NA	NA	1	0	NA	NA	NA	NA	NA	NA	0.0960501	0.13996	NA	NA	NA	NA	NA	NA	20.2866	NA	NA	NA	NA	NA	NA	0.218088
Brain	Chil1	2.42157	NA	NA	NA	NA	NA	NA	NA	1	NA	NA	NA	NA	NA	NA	NA	0.000464404	NA	NA	NA	NA	NA	NA	NA	NA	NA	NA	NA	NA	NA	NA	0.217897
Brain	Gm45629	7.7471	-0.92984	NA	NA	NA	NA	NA	NA	0	-1	NA	NA	NA	NA	NA	NA	0.484914	0.0902963	NA	NA	NA	NA	NA	NA	5.5477	NA	NA	NA	NA	NA	NA	0.217897
Brain	Pink1	43.5117	NA	NA	NA	NA	NA	NA	NA	1	NA	NA	NA	NA	NA	NA	NA	0.00104649	NA	NA	NA	NA	NA	NA	NA	NA	NA	NA	NA	NA	NA	NA	0.217821
Brain	Stradb	-3.41329	NA	NA	NA	NA	NA	NA	NA	-1	NA	NA	NA	NA	NA	NA	NA	0.00227752	NA	NA	NA	NA	NA	NA	NA	NA	NA	NA	NA	NA	NA	NA	0.217673
Brain	Trrap	-2.88473	NA	NA	NA	NA	NA	NA	NA	-1	NA	NA	NA	NA	NA	NA	NA	0.0951836	NA	NA	NA	NA	NA	NA	NA	NA	NA	NA	NA	NA	NA	NA	0.217652
Brain	Lhfpl2	2.33659	NA	NA	NA	NA	NA	NA	NA	1	NA	NA	NA	NA	NA	NA	NA	0.0142695	NA	NA	NA	NA	NA	NA	NA	NA	NA	NA	NA	NA	NA	NA	0.217444
Brain	A930037H05Rik	1.30223	NA	NA	NA	NA	NA	NA	NA	1	NA	NA	NA	NA	NA	NA	NA	0.00124344	NA	NA	NA	NA	NA	NA	NA	NA	NA	NA	NA	NA	NA	NA	0.217367
Brain	Itgax	1.09691	NA	NA	NA	NA	NA	NA	NA	1	NA	NA	NA	NA	NA	NA	NA	0.000645628	NA	NA	NA	NA	NA	NA	NA	NA	NA	NA	NA	NA	NA	NA	0.217307
Brain	Podnl1	0.266216	NA	NA	NA	NA	NA	NA	NA	1	NA	NA	NA	NA	NA	NA	NA	0.000453234	NA	NA	NA	NA	NA	NA	NA	NA	NA	NA	NA	NA	NA	NA	0.217073
Brain	Pygl	1.48482	NA	NA	NA	NA	NA	NA	NA	1	NA	NA	NA	NA	NA	NA	NA	0.000496539	NA	NA	NA	NA	NA	NA	NA	NA	NA	NA	NA	NA	NA	NA	0.216626
Brain	Ern2	0.475181	NA	NA	NA	NA	NA	NA	NA	1	NA	NA	NA	NA	NA	NA	NA	0.00477162	NA	NA	NA	NA	NA	NA	NA	NA	NA	NA	NA	NA	NA	NA	0.216415
Brain	Col13a1	0.547037	NA	NA	NA	NA	NA	NA	NA	1	NA	NA	NA	NA	NA	NA	NA	0.00120984	NA	NA	NA	NA	NA	NA	NA	NA	NA	NA	NA	NA	NA	NA	0.216336
Brain	Zfp939	1.0398	-7.5627	NA	NA	NA	NA	NA	NA	0	-1	NA	NA	NA	NA	NA	NA	0.179749	0.0999782	NA	NA	NA	NA	NA	NA	20.2856	NA	NA	NA	NA	NA	NA	0.216135
Brain	Pfkfb1	0.627893	NA	NA	NA	NA	NA	NA	NA	1	NA	NA	NA	NA	NA	NA	NA	0.0027587	NA	NA	NA	NA	NA	NA	NA	NA	NA	NA	NA	NA	NA	NA	0.216089
Brain	Islr	3.81971	NA	NA	NA	NA	NA	NA	NA	1	NA	NA	NA	NA	NA	NA	NA	0.00155925	NA	NA	NA	NA	NA	NA	NA	NA	NA	NA	NA	NA	NA	NA	0.216043
Brain	Dnajb11	-6.17826	NA	NA	NA	NA	NA	NA	NA	-1	NA	NA	NA	NA	NA	NA	NA	0.000457824	NA	NA	NA	NA	NA	NA	NA	NA	NA	NA	NA	NA	NA	NA	0.216038
Brain	Ube2b	-10.2496	NA	NA	NA	NA	NA	NA	NA	-1	NA	NA	NA	NA	NA	NA	NA	0.0011533	NA	NA	NA	NA	NA	NA	NA	NA	NA	NA	NA	NA	NA	NA	0.216038
Brain	C1ra	0.673096	NA	NA	NA	NA	NA	NA	NA	1	NA	NA	NA	NA	NA	NA	NA	0.00067755	NA	NA	NA	NA	NA	NA	NA	NA	NA	NA	NA	NA	NA	NA	0.216027
Brain	Tmem119	2.78774	NA	NA	NA	NA	NA	NA	NA	1	NA	NA	NA	NA	NA	NA	NA	0.00233325	NA	NA	NA	NA	NA	NA	NA	NA	NA	NA	NA	NA	NA	NA	0.215853
Brain	Lcp1	2.34935	NA	NA	NA	NA	NA	NA	NA	1	NA	NA	NA	NA	NA	NA	NA	0.000496984	NA	NA	NA	NA	NA	NA	NA	NA	NA	NA	NA	NA	NA	NA	0.215736
Brain	Cyp2j6	-17.906	3.0215	NA	NA	NA	NA	NA	NA	0	1	NA	NA	NA	NA	NA	NA	0.481592	0.0781367	NA	NA	NA	NA	NA	NA	5.17787	NA	NA	NA	NA	NA	NA	0.215279
Brain	Sord	2.18344	NA	NA	NA	NA	NA	NA	NA	1	NA	NA	NA	NA	NA	NA	NA	0.000679685	NA	NA	NA	NA	NA	NA	NA	NA	NA	NA	NA	NA	NA	NA	0.215232
Brain	Gprin3	-2.77676	NA	NA	NA	NA	NA	NA	NA	-1	NA	NA	NA	NA	NA	NA	NA	0.000626908	NA	NA	NA	NA	NA	NA	NA	NA	NA	NA	NA	NA	NA	NA	0.215104
Brain	Gm6277	-0.611821	NA	NA	NA	NA	NA	NA	NA	-1	NA	NA	NA	NA	NA	NA	NA	0.0550965	NA	NA	NA	NA	NA	NA	NA	NA	NA	NA	NA	NA	NA	NA	0.215077
Brain	Mr1	1.03935	NA	NA	NA	NA	NA	NA	NA	1	NA	NA	NA	NA	NA	NA	NA	0.00316498	NA	NA	NA	NA	NA	NA	NA	NA	NA	NA	NA	NA	NA	NA	0.214337
Brain	Gm14418	0.65329	NA	NA	NA	NA	NA	NA	NA	1	NA	NA	NA	NA	NA	NA	NA	0.0259635	NA	NA	NA	NA	NA	NA	NA	NA	NA	NA	NA	NA	NA	NA	0.213923
Brain	Cirbp	8.93852	NA	NA	NA	NA	NA	NA	NA	1	NA	NA	NA	NA	NA	NA	NA	0.00653928	NA	NA	NA	NA	NA	NA	NA	NA	NA	NA	NA	NA	NA	NA	0.213923
Brain	Txnrd3	1.0841	NA	NA	NA	NA	NA	NA	NA	1	NA	NA	NA	NA	NA	NA	NA	0.001635	NA	NA	NA	NA	NA	NA	NA	NA	NA	NA	NA	NA	NA	NA	0.2139
Brain	Otud7b	2.30033	NA	NA	NA	NA	NA	NA	NA	1	NA	NA	NA	NA	NA	NA	NA	0.0052186	NA	NA	NA	NA	NA	NA	NA	NA	NA	NA	NA	NA	NA	NA	0.213882
Brain	Tmprss5	1.31707	NA	NA	NA	NA	NA	NA	NA	1	NA	NA	NA	NA	NA	NA	NA	0.00182589	NA	NA	NA	NA	NA	NA	NA	NA	NA	NA	NA	NA	NA	NA	0.213748
Brain	Scara3	3.36634	NA	NA	NA	NA	NA	NA	NA	1	NA	NA	NA	NA	NA	NA	NA	0.000710469	NA	NA	NA	NA	NA	NA	NA	NA	NA	NA	NA	NA	NA	NA	0.213675
Brain	Gstm6	0.995414	NA	NA	NA	NA	NA	NA	NA	1	NA	NA	NA	NA	NA	NA	NA	0.000959533	NA	NA	NA	NA	NA	NA	NA	NA	NA	NA	NA	NA	NA	NA	0.213538
Brain	Pbxip1	5.91828	NA	NA	NA	NA	NA	NA	NA	1	NA	NA	NA	NA	NA	NA	NA	0.000497879	NA	NA	NA	NA	NA	NA	NA	NA	NA	NA	NA	NA	NA	NA	0.213272
Brain	Ptprj	-5.39831	NA	NA	NA	NA	NA	NA	NA	-1	NA	NA	NA	NA	NA	NA	NA	0.000866298	NA	NA	NA	NA	NA	NA	NA	NA	NA	NA	NA	NA	NA	NA	0.213066
Brain	Gipc2	0.615207	NA	NA	NA	NA	NA	NA	NA	1	NA	NA	NA	NA	NA	NA	NA	0.00331265	NA	NA	NA	NA	NA	NA	NA	NA	NA	NA	NA	NA	NA	NA	0.213006
Brain	Lpl	2.39445	NA	NA	NA	NA	NA	NA	NA	1	NA	NA	NA	NA	NA	NA	NA	0.000504988	NA	NA	NA	NA	NA	NA	NA	NA	NA	NA	NA	NA	NA	NA	0.212917
Brain	Gna12	-3385.3	18.284	NA	NA	NA	NA	NA	NA	0	1	NA	NA	NA	NA	NA	NA	0.230289	0.0843594	NA	NA	NA	NA	NA	NA	3.10417	NA	NA	NA	NA	NA	NA	0.212898
Brain	AU020206	0.803638	NA	NA	NA	NA	NA	NA	NA	1	NA	NA	NA	NA	NA	NA	NA	0.000597497	NA	NA	NA	NA	NA	NA	NA	NA	NA	NA	NA	NA	NA	NA	0.212772
Brain	Haus4	0.738441	NA	NA	NA	NA	NA	NA	NA	1	NA	NA	NA	NA	NA	NA	NA	0.00189748	NA	NA	NA	NA	NA	NA	NA	NA	NA	NA	NA	NA	NA	NA	0.212615
Brain	Gm16240	0.259955	NA	NA	NA	NA	NA	NA	NA	1	NA	NA	NA	NA	NA	NA	NA	0.00141875	NA	NA	NA	NA	NA	NA	NA	NA	NA	NA	NA	NA	NA	NA	0.212178
Brain	Mcam	-7.2568	6.1638	NA	NA	NA	NA	NA	NA	0	1	NA	NA	NA	NA	NA	NA	0.188995	0.0937113	NA	NA	NA	NA	NA	NA	9.74973	NA	NA	NA	NA	NA	NA	0.212096
Brain	Gm5117	2.467	-0.96674	NA	NA	NA	NA	NA	NA	0	-1	NA	NA	NA	NA	NA	NA	0.142066	0.0968007	NA	NA	NA	NA	NA	NA	8.99393	NA	NA	NA	NA	NA	NA	0.212091
Brain	Pdzd8	-3.59555	NA	NA	NA	NA	NA	NA	NA	-1	NA	NA	NA	NA	NA	NA	NA	0.0113927	NA	NA	NA	NA	NA	NA	NA	NA	NA	NA	NA	NA	NA	NA	0.21206
Brain	Stat3	5.40802	NA	NA	NA	NA	NA	NA	NA	1	NA	NA	NA	NA	NA	NA	NA	0.000769866	NA	NA	NA	NA	NA	NA	NA	NA	NA	NA	NA	NA	NA	NA	0.212021
Brain	B3gnt8	0.46074	-1153.7	NA	NA	NA	NA	NA	NA	1	0	NA	NA	NA	NA	NA	NA	0.0903213	0.19179	NA	NA	NA	NA	NA	NA	26.9667	NA	NA	NA	NA	NA	NA	0.21201
Brain	Slc22a6	3.28099	NA	NA	NA	NA	NA	NA	NA	1	NA	NA	NA	NA	NA	NA	NA	0.00116675	NA	NA	NA	NA	NA	NA	NA	NA	NA	NA	NA	NA	NA	NA	0.211712
Brain	Gnl2	-9.2699	6.065	NA	NA	NA	NA	NA	NA	0	1	NA	NA	NA	NA	NA	NA	0.147393	0.0901818	NA	NA	NA	NA	NA	NA	10.7889	NA	NA	NA	NA	NA	NA	0.21153
Brain	Gm20939	0.377997	NA	NA	NA	NA	NA	NA	NA	1	NA	NA	NA	NA	NA	NA	NA	0.0467841	NA	NA	NA	NA	NA	NA	NA	NA	NA	NA	NA	NA	NA	NA	0.211472
Brain	Ctso	4.04441	NA	NA	NA	NA	NA	NA	NA	1	NA	NA	NA	NA	NA	NA	NA	0.000532773	NA	NA	NA	NA	NA	NA	NA	NA	NA	NA	NA	NA	NA	NA	0.21132
Brain	Pcdhb11	1.69154	NA	NA	NA	NA	NA	NA	NA	1	NA	NA	NA	NA	NA	NA	NA	0.000526774	NA	NA	NA	NA	NA	NA	NA	NA	NA	NA	NA	NA	NA	NA	0.211249
Brain	Apoe	228.023	NA	NA	NA	NA	NA	NA	NA	1	NA	NA	NA	NA	NA	NA	NA	0.000551005	NA	NA	NA	NA	NA	NA	NA	NA	NA	NA	NA	NA	NA	NA	0.210928
Brain	Vdr	0.765707	NA	NA	NA	NA	NA	NA	NA	1	NA	NA	NA	NA	NA	NA	NA	0.00106517	NA	NA	NA	NA	NA	NA	NA	NA	NA	NA	NA	NA	NA	NA	0.21084
Brain	Gm40466	1.08627	NA	NA	NA	NA	NA	NA	NA	1	NA	NA	NA	NA	NA	NA	NA	0.000535125	NA	NA	NA	NA	NA	NA	NA	NA	NA	NA	NA	NA	NA	NA	0.210808
Brain	Themis2	0.541475	NA	NA	NA	NA	NA	NA	NA	1	NA	NA	NA	NA	NA	NA	NA	0.00156894	NA	NA	NA	NA	NA	NA	NA	NA	NA	NA	NA	NA	NA	NA	0.210805
Brain	Esp4	0.173285	NA	NA	NA	NA	NA	NA	NA	1	NA	NA	NA	NA	NA	NA	NA	0.00987965	NA	NA	NA	NA	NA	NA	NA	NA	NA	NA	NA	NA	NA	NA	0.210706
Brain	Gm4202	-2.62646	NA	NA	NA	NA	NA	NA	NA	-1	NA	NA	NA	NA	NA	NA	NA	0.00136546	NA	NA	NA	NA	NA	NA	NA	NA	NA	NA	NA	NA	NA	NA	0.21048
Brain	Sh3tc1	0.926972	NA	NA	NA	NA	NA	NA	NA	1	NA	NA	NA	NA	NA	NA	NA	0.00136221	NA	NA	NA	NA	NA	NA	NA	NA	NA	NA	NA	NA	NA	NA	0.210455
Brain	Serpinh1	-3.17294	NA	NA	NA	NA	NA	NA	NA	-1	NA	NA	NA	NA	NA	NA	NA	0.00119005	NA	NA	NA	NA	NA	NA	NA	NA	NA	NA	NA	NA	NA	NA	0.210287
Brain	Cd44	1.71914	NA	NA	NA	NA	NA	NA	NA	1	NA	NA	NA	NA	NA	NA	NA	0.00289986	NA	NA	NA	NA	NA	NA	NA	NA	NA	NA	NA	NA	NA	NA	0.209917
Brain	Med14	-5.9968	NA	NA	NA	NA	NA	NA	NA	-1	NA	NA	NA	NA	NA	NA	NA	0.00967393	NA	NA	NA	NA	NA	NA	NA	NA	NA	NA	NA	NA	NA	NA	0.209914
Brain	Tmem88b	-27.036	13.375	NA	NA	NA	NA	NA	NA	0	1	NA	NA	NA	NA	NA	NA	0.216805	0.0823355	NA	NA	NA	NA	NA	NA	8.28021	NA	NA	NA	NA	NA	NA	0.209778
Brain	Rabif	-4.4142	NA	NA	NA	NA	NA	NA	NA	-1	NA	NA	NA	NA	NA	NA	NA	0.00240417	NA	NA	NA	NA	NA	NA	NA	NA	NA	NA	NA	NA	NA	NA	0.209684
Brain	Chordc1	-10.6756	NA	NA	NA	NA	NA	NA	NA	-1	NA	NA	NA	NA	NA	NA	NA	0.000677036	NA	NA	NA	NA	NA	NA	NA	NA	NA	NA	NA	NA	NA	NA	0.209612
Brain	Usp15	-6.59518	NA	NA	NA	NA	NA	NA	NA	-1	NA	NA	NA	NA	NA	NA	NA	0.00216297	NA	NA	NA	NA	NA	NA	NA	NA	NA	NA	NA	NA	NA	NA	0.209574
Brain	Pla2g4e	1.66904	NA	NA	NA	NA	NA	NA	NA	1	NA	NA	NA	NA	NA	NA	NA	0.0057867	NA	NA	NA	NA	NA	NA	NA	NA	NA	NA	NA	NA	NA	NA	0.209489
Brain	Rmdn3	-5.57225	NA	NA	NA	NA	NA	NA	NA	-1	NA	NA	NA	NA	NA	NA	NA	0.00158943	NA	NA	NA	NA	NA	NA	NA	NA	NA	NA	NA	NA	NA	NA	0.209306
Brain	Ryr3	-4.54208	NA	NA	NA	NA	NA	NA	NA	-1	NA	NA	NA	NA	NA	NA	NA	0.000828779	NA	NA	NA	NA	NA	NA	NA	NA	NA	NA	NA	NA	NA	NA	0.209196
Brain	Ptpn5	-15.6874	NA	NA	NA	NA	NA	NA	NA	-1	NA	NA	NA	NA	NA	NA	NA	0.003958	NA	NA	NA	NA	NA	NA	NA	NA	NA	NA	NA	NA	NA	NA	0.208932
Brain	Inpp5d	2.04457	NA	NA	NA	NA	NA	NA	NA	1	NA	NA	NA	NA	NA	NA	NA	0.000566303	NA	NA	NA	NA	NA	NA	NA	NA	NA	NA	NA	NA	NA	NA	0.208912
Brain	A330008L17Rik	-0.936865	NA	NA	NA	NA	NA	NA	NA	-1	NA	NA	NA	NA	NA	NA	NA	0.000759464	NA	NA	NA	NA	NA	NA	NA	NA	NA	NA	NA	NA	NA	NA	0.208803
Brain	Ttc14	-5.57855	NA	NA	NA	NA	NA	NA	NA	-1	NA	NA	NA	NA	NA	NA	NA	0.010139	NA	NA	NA	NA	NA	NA	NA	NA	NA	NA	NA	NA	NA	NA	0.208767
Brain	Rab3c	-20.2835	NA	NA	NA	NA	NA	NA	NA	-1	NA	NA	NA	NA	NA	NA	NA	0.00133566	NA	NA	NA	NA	NA	NA	NA	NA	NA	NA	NA	NA	NA	NA	0.208761
Brain	Fzd3	-7.03621	NA	NA	NA	NA	NA	NA	NA	-1	NA	NA	NA	NA	NA	NA	NA	0.00464429	NA	NA	NA	NA	NA	NA	NA	NA	NA	NA	NA	NA	NA	NA	0.208592
Brain	Parvg	0.950572	NA	NA	NA	NA	NA	NA	NA	1	NA	NA	NA	NA	NA	NA	NA	0.000610387	NA	NA	NA	NA	NA	NA	NA	NA	NA	NA	NA	NA	NA	NA	0.208519
Brain	Gm13648	0.172511	NA	NA	NA	NA	NA	NA	NA	1	NA	NA	NA	NA	NA	NA	NA	0.0121304	NA	NA	NA	NA	NA	NA	NA	NA	NA	NA	NA	NA	NA	NA	0.208153
Brain	Dapp1	-275.68	1.1312	NA	NA	NA	NA	NA	NA	0	1	NA	NA	NA	NA	NA	NA	0.193781	0.0874797	NA	NA	NA	NA	NA	NA	3.0823	NA	NA	NA	NA	NA	NA	0.207986
Brain	Tardbp	-3.53305	NA	NA	NA	NA	NA	NA	NA	-1	NA	NA	NA	NA	NA	NA	NA	0.00750391	NA	NA	NA	NA	NA	NA	NA	NA	NA	NA	NA	NA	NA	NA	0.207968
Brain	Gpr37	8.93294	NA	NA	NA	NA	NA	NA	NA	1	NA	NA	NA	NA	NA	NA	NA	0.000579093	NA	NA	NA	NA	NA	NA	NA	NA	NA	NA	NA	NA	NA	NA	0.20796
Brain	Trappc6a	1.26837	NA	NA	NA	NA	NA	NA	NA	1	NA	NA	NA	NA	NA	NA	NA	0.000606234	NA	NA	NA	NA	NA	NA	NA	NA	NA	NA	NA	NA	NA	NA	0.207576
Brain	Ccdc88b	0.773886	NA	NA	NA	NA	NA	NA	NA	1	NA	NA	NA	NA	NA	NA	NA	0.000805776	NA	NA	NA	NA	NA	NA	NA	NA	NA	NA	NA	NA	NA	NA	0.20752
Brain	Gns	7.82914	NA	NA	NA	NA	NA	NA	NA	1	NA	NA	NA	NA	NA	NA	NA	0.000964565	NA	NA	NA	NA	NA	NA	NA	NA	NA	NA	NA	NA	NA	NA	0.207446
Brain	Fstl4	-3.86017	NA	NA	NA	NA	NA	NA	NA	-1	NA	NA	NA	NA	NA	NA	NA	0.00623227	NA	NA	NA	NA	NA	NA	NA	NA	NA	NA	NA	NA	NA	NA	0.207377
Brain	Hsp90b1	-25.0869	NA	NA	NA	NA	NA	NA	NA	-1	NA	NA	NA	NA	NA	NA	NA	0.000609987	NA	NA	NA	NA	NA	NA	NA	NA	NA	NA	NA	NA	NA	NA	0.207287
Brain	Lat	0.422933	NA	NA	NA	NA	NA	NA	NA	1	NA	NA	NA	NA	NA	NA	NA	0.000788329	NA	NA	NA	NA	NA	NA	NA	NA	NA	NA	NA	NA	NA	NA	0.207171
Brain	Ptges	1.13038	NA	NA	NA	NA	NA	NA	NA	1	NA	NA	NA	NA	NA	NA	NA	0.00146499	NA	NA	NA	NA	NA	NA	NA	NA	NA	NA	NA	NA	NA	NA	0.206939
Brain	Zc3h12b	-0.939498	NA	NA	NA	NA	NA	NA	NA	-1	NA	NA	NA	NA	NA	NA	NA	0.0708794	NA	NA	NA	NA	NA	NA	NA	NA	NA	NA	NA	NA	NA	NA	0.206689
Brain	Slc2a10	0.84541	NA	NA	NA	NA	NA	NA	NA	1	NA	NA	NA	NA	NA	NA	NA	0.00157975	NA	NA	NA	NA	NA	NA	NA	NA	NA	NA	NA	NA	NA	NA	0.206294
Brain	Cdh8	-3.28211	NA	NA	NA	NA	NA	NA	NA	-1	NA	NA	NA	NA	NA	NA	NA	0.00061704	NA	NA	NA	NA	NA	NA	NA	NA	NA	NA	NA	NA	NA	NA	0.206289
Brain	Gm14327	0.49929	-676.92	NA	NA	NA	NA	NA	NA	1	0	NA	NA	NA	NA	NA	NA	0.0910581	0.289062	NA	NA	NA	NA	NA	NA	26.957	NA	NA	NA	NA	NA	NA	0.206243
Brain	Gm37478	-2.7723	1.4765	NA	NA	NA	NA	NA	NA	0	1	NA	NA	NA	NA	NA	NA	0.134863	0.0994763	NA	NA	NA	NA	NA	NA	10.5724	NA	NA	NA	NA	NA	NA	0.20589
Brain	Prr18	-2827.8	12.414	NA	NA	NA	NA	NA	NA	0	1	NA	NA	NA	NA	NA	NA	0.218214	0.0954493	NA	NA	NA	NA	NA	NA	3.10669	NA	NA	NA	NA	NA	NA	0.205806
Brain	Nkx3-1	0.467343	NA	NA	NA	NA	NA	NA	NA	1	NA	NA	NA	NA	NA	NA	NA	0.00694183	NA	NA	NA	NA	NA	NA	NA	NA	NA	NA	NA	NA	NA	NA	0.205703
Brain	Lrrc4c	-8.41629	NA	NA	NA	NA	NA	NA	NA	-1	NA	NA	NA	NA	NA	NA	NA	0.000643553	NA	NA	NA	NA	NA	NA	NA	NA	NA	NA	NA	NA	NA	NA	0.205528
Brain	Hus1b	-3.8037	1.2607	-0.50865	NA	NA	NA	NA	NA	-1	0	0	NA	NA	NA	NA	NA	0.092481	0.239954	0.175266	NA	NA	NA	NA	NA	6.23285	14.4805	NA	NA	NA	NA	NA	0.205358
Brain	Numb	-4.18852	NA	NA	NA	NA	NA	NA	NA	-1	NA	NA	NA	NA	NA	NA	NA	0.00120893	NA	NA	NA	NA	NA	NA	NA	NA	NA	NA	NA	NA	NA	NA	0.205355
Brain	Frmd4b	3.0252	NA	NA	NA	NA	NA	NA	NA	1	NA	NA	NA	NA	NA	NA	NA	0.000774214	NA	NA	NA	NA	NA	NA	NA	NA	NA	NA	NA	NA	NA	NA	0.205319
Brain	Pex1	-1.45899	NA	NA	NA	NA	NA	NA	NA	-1	NA	NA	NA	NA	NA	NA	NA	0.0165616	NA	NA	NA	NA	NA	NA	NA	NA	NA	NA	NA	NA	NA	NA	0.205091
Brain	Trpm4	1.56904	NA	NA	NA	NA	NA	NA	NA	1	NA	NA	NA	NA	NA	NA	NA	0.000720391	NA	NA	NA	NA	NA	NA	NA	NA	NA	NA	NA	NA	NA	NA	0.205087
Brain	B230369F24Rik	-0.226565	NA	NA	NA	NA	NA	NA	NA	-1	NA	NA	NA	NA	NA	NA	NA	0.00271084	NA	NA	NA	NA	NA	NA	NA	NA	NA	NA	NA	NA	NA	NA	0.205032
Brain	Rnpep	-4.72276	NA	NA	NA	NA	NA	NA	NA	-1	NA	NA	NA	NA	NA	NA	NA	0.000732316	NA	NA	NA	NA	NA	NA	NA	NA	NA	NA	NA	NA	NA	NA	0.20501
Brain	Gm14804	-0.135525	NA	NA	NA	NA	NA	NA	NA	-1	NA	NA	NA	NA	NA	NA	NA	0.034199	NA	NA	NA	NA	NA	NA	NA	NA	NA	NA	NA	NA	NA	NA	0.204942
Brain	Gm11865	1.2582	-2.9095	0.20036	NA	NA	NA	NA	NA	1	0	0	NA	NA	NA	NA	NA	0.0814739	0.479827	0.225747	NA	NA	NA	NA	NA	10.365	13.0728	NA	NA	NA	NA	NA	0.204169
Brain	Spata2l	-4.94775	NA	NA	NA	NA	NA	NA	NA	-1	NA	NA	NA	NA	NA	NA	NA	0.00401728	NA	NA	NA	NA	NA	NA	NA	NA	NA	NA	NA	NA	NA	NA	0.204044
Brain	A230001M10Rik	0.799979	NA	NA	NA	NA	NA	NA	NA	1	NA	NA	NA	NA	NA	NA	NA	0.00385043	NA	NA	NA	NA	NA	NA	NA	NA	NA	NA	NA	NA	NA	NA	0.204003
Brain	Ccl3	0.385622	NA	NA	NA	NA	NA	NA	NA	1	NA	NA	NA	NA	NA	NA	NA	0.000834207	NA	NA	NA	NA	NA	NA	NA	NA	NA	NA	NA	NA	NA	NA	0.203834
Brain	Vxn	-11.7316	NA	NA	NA	NA	NA	NA	NA	-1	NA	NA	NA	NA	NA	NA	NA	0.000799547	NA	NA	NA	NA	NA	NA	NA	NA	NA	NA	NA	NA	NA	NA	0.203577
Brain	Galnt13	-4.62392	NA	NA	NA	NA	NA	NA	NA	-1	NA	NA	NA	NA	NA	NA	NA	0.00102505	NA	NA	NA	NA	NA	NA	NA	NA	NA	NA	NA	NA	NA	NA	0.203557
Brain	Rfx3	-4.19733	NA	NA	NA	NA	NA	NA	NA	-1	NA	NA	NA	NA	NA	NA	NA	0.00176653	NA	NA	NA	NA	NA	NA	NA	NA	NA	NA	NA	NA	NA	NA	0.203494
Brain	Prss42	0.255154	NA	NA	NA	NA	NA	NA	NA	1	NA	NA	NA	NA	NA	NA	NA	0.00235234	NA	NA	NA	NA	NA	NA	NA	NA	NA	NA	NA	NA	NA	NA	0.203418
Brain	Cdadc1	-4.53945	NA	NA	NA	NA	NA	NA	NA	-1	NA	NA	NA	NA	NA	NA	NA	0.000673809	NA	NA	NA	NA	NA	NA	NA	NA	NA	NA	NA	NA	NA	NA	0.203068
Brain	Nectin4	1.35213	NA	NA	NA	NA	NA	NA	NA	1	NA	NA	NA	NA	NA	NA	NA	0.00194075	NA	NA	NA	NA	NA	NA	NA	NA	NA	NA	NA	NA	NA	NA	0.202965
Brain	Fat3	-5.21286	NA	NA	NA	NA	NA	NA	NA	-1	NA	NA	NA	NA	NA	NA	NA	0.00150339	NA	NA	NA	NA	NA	NA	NA	NA	NA	NA	NA	NA	NA	NA	0.202887
Brain	Bin2	1.22662	NA	NA	NA	NA	NA	NA	NA	1	NA	NA	NA	NA	NA	NA	NA	0.000909799	NA	NA	NA	NA	NA	NA	NA	NA	NA	NA	NA	NA	NA	NA	0.202823
Brain	Mkks	-2.78377	NA	NA	NA	NA	NA	NA	NA	-1	NA	NA	NA	NA	NA	NA	NA	0.000974868	NA	NA	NA	NA	NA	NA	NA	NA	NA	NA	NA	NA	NA	NA	0.202538
Brain	Mpzl3	-1.35209	NA	NA	NA	NA	NA	NA	NA	-1	NA	NA	NA	NA	NA	NA	NA	0.00070356	NA	NA	NA	NA	NA	NA	NA	NA	NA	NA	NA	NA	NA	NA	0.20225
Brain	Pdpk1	-4.98809	NA	NA	NA	NA	NA	NA	NA	-1	NA	NA	NA	NA	NA	NA	NA	0.0168659	NA	NA	NA	NA	NA	NA	NA	NA	NA	NA	NA	NA	NA	NA	0.20174
Brain	AA986860	2.4182	-1.3709	NA	NA	NA	NA	NA	NA	1	0	NA	NA	NA	NA	NA	NA	0.0953938	0.140348	NA	NA	NA	NA	NA	NA	12.5321	NA	NA	NA	NA	NA	NA	0.201418
Brain	Lpxn	0.569144	NA	NA	NA	NA	NA	NA	NA	1	NA	NA	NA	NA	NA	NA	NA	0.000891781	NA	NA	NA	NA	NA	NA	NA	NA	NA	NA	NA	NA	NA	NA	0.201368
Brain	Dusp14	-4.11257	NA	NA	NA	NA	NA	NA	NA	-1	NA	NA	NA	NA	NA	NA	NA	0.0056046	NA	NA	NA	NA	NA	NA	NA	NA	NA	NA	NA	NA	NA	NA	0.201315
Brain	Gm49336	-3.24286	NA	NA	NA	NA	NA	NA	NA	-1	NA	NA	NA	NA	NA	NA	NA	0.00255706	NA	NA	NA	NA	NA	NA	NA	NA	NA	NA	NA	NA	NA	NA	0.201052
Brain	Fam107b	-5.61599	NA	NA	NA	NA	NA	NA	NA	-1	NA	NA	NA	NA	NA	NA	NA	0.000737159	NA	NA	NA	NA	NA	NA	NA	NA	NA	NA	NA	NA	NA	NA	0.200933
Brain	Dpp9	-6.84611	NA	NA	NA	NA	NA	NA	NA	-1	NA	NA	NA	NA	NA	NA	NA	0.000876107	NA	NA	NA	NA	NA	NA	NA	NA	NA	NA	NA	NA	NA	NA	0.200908
Brain	Olfm2	-7.65425	NA	NA	NA	NA	NA	NA	NA	-1	NA	NA	NA	NA	NA	NA	NA	0.00100474	NA	NA	NA	NA	NA	NA	NA	NA	NA	NA	NA	NA	NA	NA	0.20087
Brain	Ifi35	0.602962	NA	NA	NA	NA	NA	NA	NA	1	NA	NA	NA	NA	NA	NA	NA	0.00295486	NA	NA	NA	NA	NA	NA	NA	NA	NA	NA	NA	NA	NA	NA	0.200724
Brain	Dyrk2	-1.93151	NA	NA	NA	NA	NA	NA	NA	-1	NA	NA	NA	NA	NA	NA	NA	0.00749836	NA	NA	NA	NA	NA	NA	NA	NA	NA	NA	NA	NA	NA	NA	0.200525
Brain	5031425F14Rik	0.165221	NA	NA	NA	NA	NA	NA	NA	1	NA	NA	NA	NA	NA	NA	NA	0.00137931	NA	NA	NA	NA	NA	NA	NA	NA	NA	NA	NA	NA	NA	NA	0.200517
Brain	Arhgap5	-10.4597	NA	NA	NA	NA	NA	NA	NA	-1	NA	NA	NA	NA	NA	NA	NA	0.00118457	NA	NA	NA	NA	NA	NA	NA	NA	NA	NA	NA	NA	NA	NA	0.200248
Brain	Hbs1l	-4.18697	NA	NA	NA	NA	NA	NA	NA	-1	NA	NA	NA	NA	NA	NA	NA	0.000876971	NA	NA	NA	NA	NA	NA	NA	NA	NA	NA	NA	NA	NA	NA	0.200231
Brain	Lima1	1.74821	NA	NA	NA	NA	NA	NA	NA	1	NA	NA	NA	NA	NA	NA	NA	0.0011437	NA	NA	NA	NA	NA	NA	NA	NA	NA	NA	NA	NA	NA	NA	0.200217
Brain	Gphn	-5.50185	NA	NA	NA	NA	NA	NA	NA	-1	NA	NA	NA	NA	NA	NA	NA	0.000833028	NA	NA	NA	NA	NA	NA	NA	NA	NA	NA	NA	NA	NA	NA	0.200159
Brain	Nmral1	1.77294	NA	NA	NA	NA	NA	NA	NA	1	NA	NA	NA	NA	NA	NA	NA	0.00172996	NA	NA	NA	NA	NA	NA	NA	NA	NA	NA	NA	NA	NA	NA	0.200066
Heart	Eif2s3y	1.2048	-21.074	NA	NA	NA	NA	NA	NA	0	-1	NA	NA	NA	NA	NA	NA	0.342042	0.0980345	NA	NA	NA	NA	NA	NA	20.1063	NA	NA	NA	NA	NA	NA	0.943901
Heart	Eif2s3x	2.9883	-4.5307	NA	NA	NA	NA	NA	NA	0	-1	NA	NA	NA	NA	NA	NA	0.165195	0.0874773	NA	NA	NA	NA	NA	NA	14.9435	NA	NA	NA	NA	NA	NA	0.875323
Heart	Kcnk1	2.8651	-14.198	NA	NA	NA	NA	NA	NA	1	0	NA	NA	NA	NA	NA	NA	0.0333869	0.483626	NA	NA	NA	NA	NA	NA	25.21	NA	NA	NA	NA	NA	NA	0.70816
Heart	Prkcq	7.88417	NA	NA	NA	NA	NA	NA	NA	1	NA	NA	NA	NA	NA	NA	NA	6.09585e-12	NA	NA	NA	NA	NA	NA	NA	NA	NA	NA	NA	NA	NA	NA	0.665028
Heart	Acsm5	7.0635	-17.172	NA	NA	NA	NA	NA	NA	1	0	NA	NA	NA	NA	NA	NA	0.0437278	0.142996	NA	NA	NA	NA	NA	NA	23.2386	NA	NA	NA	NA	NA	NA	0.661066
Heart	Dpep1	95.426	-13.231	NA	NA	NA	NA	NA	NA	1	-1	NA	NA	NA	NA	NA	NA	0.0890637	0.0882433	NA	NA	NA	NA	NA	NA	6.20825	NA	NA	NA	NA	NA	NA	0.653942
Heart	Cds1	15.141	0.91895	NA	NA	NA	NA	NA	NA	1	0	NA	NA	NA	NA	NA	NA	0.0661618	0.383235	NA	NA	NA	NA	NA	NA	13.769	NA	NA	NA	NA	NA	NA	0.630279
Heart	Efemp1	13.711	-10.618	NA	NA	NA	NA	NA	NA	1	0	NA	NA	NA	NA	NA	NA	0.0653887	0.133383	NA	NA	NA	NA	NA	NA	17.0239	NA	NA	NA	NA	NA	NA	0.627845
Heart	Vgll2	2.37653	NA	NA	NA	NA	NA	NA	NA	1	NA	NA	NA	NA	NA	NA	NA	1.62539e-10	NA	NA	NA	NA	NA	NA	NA	NA	NA	NA	NA	NA	NA	NA	0.610986
Heart	Rtl3	0.27924	NA	NA	NA	NA	NA	NA	NA	1	NA	NA	NA	NA	NA	NA	NA	0.0601945	NA	NA	NA	NA	NA	NA	NA	NA	NA	NA	NA	NA	NA	NA	0.603659
Heart	Ighg2c	10.8608	NA	NA	NA	NA	NA	NA	NA	1	NA	NA	NA	NA	NA	NA	NA	2.0229e-09	NA	NA	NA	NA	NA	NA	NA	NA	NA	NA	NA	NA	NA	NA	0.58369
Heart	Skap2	7.5634	NA	NA	NA	NA	NA	NA	NA	1	NA	NA	NA	NA	NA	NA	NA	1.06664e-09	NA	NA	NA	NA	NA	NA	NA	NA	NA	NA	NA	NA	NA	NA	0.583309
Heart	Olfr1016	-2.8119	0.2545	293.12	-7.765	NA	NA	NA	NA	0	0	0	-1	NA	NA	NA	NA	0.174493	0.359642	0.153472	0.0761587	NA	NA	NA	NA	6.23513	20.9261	21.0933	NA	NA	NA	NA	0.561399
Heart	Slc38a1	-10.278	7.8665	NA	NA	NA	NA	NA	NA	-1	0	NA	NA	NA	NA	NA	NA	0.0547867	0.113567	NA	NA	NA	NA	NA	NA	16.7352	NA	NA	NA	NA	NA	NA	0.559161
Heart	Hspa4l	205.75	-11.198	NA	NA	NA	NA	NA	NA	0	-1	NA	NA	NA	NA	NA	NA	0.414952	0.0415609	NA	NA	NA	NA	NA	NA	3.6555	NA	NA	NA	NA	NA	NA	0.558755
Heart	Pcdhb20	4.381	-3.3846	NA	NA	NA	NA	NA	NA	1	0	NA	NA	NA	NA	NA	NA	0.0553412	0.190086	NA	NA	NA	NA	NA	NA	20.4101	NA	NA	NA	NA	NA	NA	0.556221
Heart	Gm28597	-90.527	0.39453	NA	NA	NA	NA	NA	NA	0	1	NA	NA	NA	NA	NA	NA	0.150991	0.075193	NA	NA	NA	NA	NA	NA	3.05916	NA	NA	NA	NA	NA	NA	0.554008
Heart	Ric3	4.1855	-11.411	NA	NA	NA	NA	NA	NA	1	0	NA	NA	NA	NA	NA	NA	0.0419712	0.492844	NA	NA	NA	NA	NA	NA	24.1462	NA	NA	NA	NA	NA	NA	0.553462
Heart	Prlr	7.3614	-33.118	NA	NA	NA	NA	NA	NA	1	0	NA	NA	NA	NA	NA	NA	0.0416447	0.488101	NA	NA	NA	NA	NA	NA	24.6092	NA	NA	NA	NA	NA	NA	0.551694
Heart	Fas	15.552	-428.08	-1.2443	NA	NA	NA	NA	NA	1	0	0	NA	NA	NA	NA	NA	0.096036	0.165422	0.195217	NA	NA	NA	NA	NA	8.9396	9.11442	NA	NA	NA	NA	NA	0.54847
Heart	Mapk12	9.7811	-6.5515	1181	-746.79	8.2981	NA	NA	NA	0	0	0	-1	1	NA	NA	NA	0.152749	0.296949	0.162312	0.0857869	0.0685117	NA	NA	NA	7.47974	11.9696	13.1718	15.1338	NA	NA	NA	0.546954
Heart	Mat2b	777.65	-14.107	NA	NA	NA	NA	NA	NA	0	-1	NA	NA	NA	NA	NA	NA	0.320409	0.0446623	NA	NA	NA	NA	NA	NA	3.17321	NA	NA	NA	NA	NA	NA	0.541535
Heart	Hsd11b1	2.36003	NA	NA	NA	NA	NA	NA	NA	1	NA	NA	NA	NA	NA	NA	NA	0.00593751	NA	NA	NA	NA	NA	NA	NA	NA	NA	NA	NA	NA	NA	NA	0.538853
Heart	2310061I04Rik	-13.9275	NA	NA	NA	NA	NA	NA	NA	-1	NA	NA	NA	NA	NA	NA	NA	8.72521e-09	NA	NA	NA	NA	NA	NA	NA	NA	NA	NA	NA	NA	NA	NA	0.538205
Heart	Chp1	50.278	-4499.8	985.92	-18.317	NA	NA	NA	NA	0	-1	0	-1	NA	NA	NA	NA	0.101815	0.0856877	0.359137	0.0676853	NA	NA	NA	NA	8.96016	9.53593	12.0463	NA	NA	NA	NA	0.537801
Heart	Cnmd	1.48509	NA	NA	NA	NA	NA	NA	NA	1	NA	NA	NA	NA	NA	NA	NA	2.05952e-06	NA	NA	NA	NA	NA	NA	NA	NA	NA	NA	NA	NA	NA	NA	0.534865
Heart	Tubb1	-0.44107	1479.1	NA	NA	NA	NA	NA	NA	0	1	NA	NA	NA	NA	NA	NA	0.19991	0.0622086	NA	NA	NA	NA	NA	NA	26.9591	NA	NA	NA	NA	NA	NA	0.531458
Heart	Amy1	7.76425	NA	NA	NA	NA	NA	NA	NA	1	NA	NA	NA	NA	NA	NA	NA	2.3876e-08	NA	NA	NA	NA	NA	NA	NA	NA	NA	NA	NA	NA	NA	NA	0.530956
Heart	Prom2	1.62518	NA	NA	NA	NA	NA	NA	NA	1	NA	NA	NA	NA	NA	NA	NA	2.40574e-08	NA	NA	NA	NA	NA	NA	NA	NA	NA	NA	NA	NA	NA	NA	0.529678
Heart	Atp6v1b2	-13.2163	NA	NA	NA	NA	NA	NA	NA	-1	NA	NA	NA	NA	NA	NA	NA	2.41914e-08	NA	NA	NA	NA	NA	NA	NA	NA	NA	NA	NA	NA	NA	NA	0.529161
Heart	Rasgrp1	0.13753	2.5587	NA	NA	NA	NA	NA	NA	0	1	NA	NA	NA	NA	NA	NA	0.43514	0.06125	NA	NA	NA	NA	NA	NA	14.8111	NA	NA	NA	NA	NA	NA	0.525963
Heart	Scgb2b27	-156.74	2885.2	-98.682	39.379	-38.424	0.49481	NA	NA	0	1	0	0	0	0	NA	NA	0.393992	0.0479757	0.42892	0.486572	0.4807	0.410633	NA	NA	5.84359	6.09731	9.84725	13.4543	15.0081	NA	NA	0.524064
Heart	Gnpat	-34.7675	NA	NA	NA	NA	NA	NA	NA	-1	NA	NA	NA	NA	NA	NA	NA	1.51474e-08	NA	NA	NA	NA	NA	NA	NA	NA	NA	NA	NA	NA	NA	NA	0.522742
Heart	Slc25a34	-39.8827	NA	NA	NA	NA	NA	NA	NA	-1	NA	NA	NA	NA	NA	NA	NA	1.31236e-08	NA	NA	NA	NA	NA	NA	NA	NA	NA	NA	NA	NA	NA	NA	0.521192
Heart	Cxcr6	-293.78	1.6158	NA	NA	NA	NA	NA	NA	0	1	NA	NA	NA	NA	NA	NA	0.138504	0.052157	NA	NA	NA	NA	NA	NA	3.05728	NA	NA	NA	NA	NA	NA	0.519542
Heart	Gm2497	-0.012239	2.1765	-2.9283	NA	NA	NA	NA	NA	0	0	-1	NA	NA	NA	NA	NA	0.476374	0.110279	0.0894464	NA	NA	NA	NA	NA	16.8459	23.0433	NA	NA	NA	NA	NA	0.516795
Heart	Tmod1	-36.1829	NA	NA	NA	NA	NA	NA	NA	-1	NA	NA	NA	NA	NA	NA	NA	1.60416e-08	NA	NA	NA	NA	NA	NA	NA	NA	NA	NA	NA	NA	NA	NA	0.516602
Heart	Eno3	-195.695	NA	NA	NA	NA	NA	NA	NA	-1	NA	NA	NA	NA	NA	NA	NA	2.58153e-08	NA	NA	NA	NA	NA	NA	NA	NA	NA	NA	NA	NA	NA	NA	0.513185
Heart	Gm15638	-2.2519	324.25	-11.77	1.4456	NA	NA	NA	NA	0	1	0	1	NA	NA	NA	NA	0.176749	0.0761802	0.462138	0.0706195	NA	NA	NA	NA	8.95681	9.08093	12.325	NA	NA	NA	NA	0.510384
Heart	Gm2619	0.824207	NA	NA	NA	NA	NA	NA	NA	1	NA	NA	NA	NA	NA	NA	NA	5.13386e-08	NA	NA	NA	NA	NA	NA	NA	NA	NA	NA	NA	NA	NA	NA	0.507304
Heart	Cs	-10.92	-366.39	NA	NA	NA	NA	NA	NA	0	-1	NA	NA	NA	NA	NA	NA	0.453189	0.0905213	NA	NA	NA	NA	NA	NA	15.0534	NA	NA	NA	NA	NA	NA	0.505324
Heart	Fkbp4	-74.4388	NA	NA	NA	NA	NA	NA	NA	-1	NA	NA	NA	NA	NA	NA	NA	3.04971e-08	NA	NA	NA	NA	NA	NA	NA	NA	NA	NA	NA	NA	NA	NA	0.503195
Heart	Acsl1	-120.382	NA	NA	NA	NA	NA	NA	NA	-1	NA	NA	NA	NA	NA	NA	NA	3.35577e-08	NA	NA	NA	NA	NA	NA	NA	NA	NA	NA	NA	NA	NA	NA	0.50078
Heart	Auh	-10.6226	NA	NA	NA	NA	NA	NA	NA	-1	NA	NA	NA	NA	NA	NA	NA	4.52016e-08	NA	NA	NA	NA	NA	NA	NA	NA	NA	NA	NA	NA	NA	NA	0.498635
Heart	Fgr	-0.20173	1.5687	NA	NA	NA	NA	NA	NA	0	1	NA	NA	NA	NA	NA	NA	0.349428	0.0591676	NA	NA	NA	NA	NA	NA	14.9435	NA	NA	NA	NA	NA	NA	0.496442
Heart	Pde11a	1.94027	NA	NA	NA	NA	NA	NA	NA	1	NA	NA	NA	NA	NA	NA	NA	4.66134e-08	NA	NA	NA	NA	NA	NA	NA	NA	NA	NA	NA	NA	NA	NA	0.493935
Heart	Cyp2b10	3.26711	NA	NA	NA	NA	NA	NA	NA	1	NA	NA	NA	NA	NA	NA	NA	3.9333e-08	NA	NA	NA	NA	NA	NA	NA	NA	NA	NA	NA	NA	NA	NA	0.493754
Heart	Fbxo31	-24.5993	NA	NA	NA	NA	NA	NA	NA	-1	NA	NA	NA	NA	NA	NA	NA	4.9823e-08	NA	NA	NA	NA	NA	NA	NA	NA	NA	NA	NA	NA	NA	NA	0.493242
Heart	Ccr2	3.63393	NA	NA	NA	NA	NA	NA	NA	1	NA	NA	NA	NA	NA	NA	NA	4.67962e-08	NA	NA	NA	NA	NA	NA	NA	NA	NA	NA	NA	NA	NA	NA	0.489528
Heart	Coq9	15331	-104.79	NA	NA	NA	NA	NA	NA	0	-1	NA	NA	NA	NA	NA	NA	0.16695	0.0522367	NA	NA	NA	NA	NA	NA	3.05914	NA	NA	NA	NA	NA	NA	0.488264
Heart	Itgal	-18.761	2.1223	NA	NA	NA	NA	NA	NA	0	1	NA	NA	NA	NA	NA	NA	0.470667	0.048848	NA	NA	NA	NA	NA	NA	4.2326	NA	NA	NA	NA	NA	NA	0.486794
Heart	Cdh22	6.8797	-7.3833	NA	NA	NA	NA	NA	NA	1	0	NA	NA	NA	NA	NA	NA	0.0554204	0.145016	NA	NA	NA	NA	NA	NA	19.4122	NA	NA	NA	NA	NA	NA	0.485625
Heart	Gabarapl1	88.715	-2315.7	-6.8387	NA	NA	NA	NA	NA	1	0	0	NA	NA	NA	NA	NA	0.0873743	0.163942	0.183283	NA	NA	NA	NA	NA	8.89213	9.07371	NA	NA	NA	NA	NA	0.481576
Heart	4930533B01Rik	-0.060422	1.1347	NA	NA	NA	NA	NA	NA	0	1	NA	NA	NA	NA	NA	NA	0.403258	0.0870132	NA	NA	NA	NA	NA	NA	16.3577	NA	NA	NA	NA	NA	NA	0.478383
Heart	Itgb7	1.97916	NA	NA	NA	NA	NA	NA	NA	1	NA	NA	NA	NA	NA	NA	NA	1.47524e-07	NA	NA	NA	NA	NA	NA	NA	NA	NA	NA	NA	NA	NA	NA	0.47798
Heart	Abat	19.868	-11.493	NA	NA	NA	NA	NA	NA	1	0	NA	NA	NA	NA	NA	NA	0.059631	0.157897	NA	NA	NA	NA	NA	NA	16.7096	NA	NA	NA	NA	NA	NA	0.477695
Heart	Coq4	-3.5765	15.385	NA	NA	NA	NA	NA	NA	-1	0	NA	NA	NA	NA	NA	NA	0.0478091	0.488274	NA	NA	NA	NA	NA	NA	24.9	NA	NA	NA	NA	NA	NA	0.477115
Heart	Tmem94	-4403.8	-14.523	NA	NA	NA	NA	NA	NA	0	-1	NA	NA	NA	NA	NA	NA	0.126086	0.0801567	NA	NA	NA	NA	NA	NA	3.0397	NA	NA	NA	NA	NA	NA	0.476356
Heart	Asb11	-15.8034	NA	NA	NA	NA	NA	NA	NA	-1	NA	NA	NA	NA	NA	NA	NA	0.00305934	NA	NA	NA	NA	NA	NA	NA	NA	NA	NA	NA	NA	NA	NA	0.472276
Heart	Usp9y	0.86405	NA	NA	NA	NA	NA	NA	NA	1	NA	NA	NA	NA	NA	NA	NA	0.00499366	NA	NA	NA	NA	NA	NA	NA	NA	NA	NA	NA	NA	NA	NA	0.471946
Heart	Cdkn1c	-5.31295	NA	NA	NA	NA	NA	NA	NA	-1	NA	NA	NA	NA	NA	NA	NA	1.70042e-07	NA	NA	NA	NA	NA	NA	NA	NA	NA	NA	NA	NA	NA	NA	0.471702
Heart	Gm47816	-23.874	11.61	-156.51	-0.11833	NA	NA	NA	NA	0	0	-1	0	NA	NA	NA	NA	0.326593	0.41212	0.0957697	0.247223	NA	NA	NA	NA	4.02687	8.83803	9.03059	NA	NA	NA	NA	0.47014
Heart	Dlat	-55.2564	NA	NA	NA	NA	NA	NA	NA	-1	NA	NA	NA	NA	NA	NA	NA	1.61329e-06	NA	NA	NA	NA	NA	NA	NA	NA	NA	NA	NA	NA	NA	NA	0.469612
Heart	Rilpl1	-21.271	NA	NA	NA	NA	NA	NA	NA	-1	NA	NA	NA	NA	NA	NA	NA	1.10952e-07	NA	NA	NA	NA	NA	NA	NA	NA	NA	NA	NA	NA	NA	NA	0.469448
Heart	Camk2b	7.7101	-8.0465	NA	NA	NA	NA	NA	NA	1	0	NA	NA	NA	NA	NA	NA	0.0714552	0.184374	NA	NA	NA	NA	NA	NA	18.819	NA	NA	NA	NA	NA	NA	0.469278
Heart	Doc2b	0.697366	NA	NA	NA	NA	NA	NA	NA	1	NA	NA	NA	NA	NA	NA	NA	1.57124e-07	NA	NA	NA	NA	NA	NA	NA	NA	NA	NA	NA	NA	NA	NA	0.468443
Heart	Letm1	-23.0781	NA	NA	NA	NA	NA	NA	NA	-1	NA	NA	NA	NA	NA	NA	NA	1.32234e-07	NA	NA	NA	NA	NA	NA	NA	NA	NA	NA	NA	NA	NA	NA	0.468279
Heart	Fblim1	-36.5045	NA	NA	NA	NA	NA	NA	NA	-1	NA	NA	NA	NA	NA	NA	NA	5.64281e-07	NA	NA	NA	NA	NA	NA	NA	NA	NA	NA	NA	NA	NA	NA	0.46821
Heart	Htra3	-31.1326	NA	NA	NA	NA	NA	NA	NA	-1	NA	NA	NA	NA	NA	NA	NA	4.51672e-07	NA	NA	NA	NA	NA	NA	NA	NA	NA	NA	NA	NA	NA	NA	0.466154
Heart	Aldob	65.185	-4.0587	NA	NA	NA	NA	NA	NA	1	0	NA	NA	NA	NA	NA	NA	0.0716465	0.148828	NA	NA	NA	NA	NA	NA	6.25751	NA	NA	NA	NA	NA	NA	0.465489
Heart	Scml2	-297.3	0.88354	NA	NA	NA	NA	NA	NA	0	1	NA	NA	NA	NA	NA	NA	0.163611	0.0824774	NA	NA	NA	NA	NA	NA	3.0434	NA	NA	NA	NA	NA	NA	0.464428
Heart	Oxct1	-127.957	NA	NA	NA	NA	NA	NA	NA	-1	NA	NA	NA	NA	NA	NA	NA	1.67188e-07	NA	NA	NA	NA	NA	NA	NA	NA	NA	NA	NA	NA	NA	NA	0.464219
Heart	Tango2	-19.6913	NA	NA	NA	NA	NA	NA	NA	-1	NA	NA	NA	NA	NA	NA	NA	1.3198e-07	NA	NA	NA	NA	NA	NA	NA	NA	NA	NA	NA	NA	NA	NA	0.464161
Heart	Tecrl	1372	-11.592	NA	NA	NA	NA	NA	NA	0	-1	NA	NA	NA	NA	NA	NA	0.230178	0.0524637	NA	NA	NA	NA	NA	NA	3.13977	NA	NA	NA	NA	NA	NA	0.463251
Heart	Myh7	153.889	NA	NA	NA	NA	NA	NA	NA	1	NA	NA	NA	NA	NA	NA	NA	3.53051e-07	NA	NA	NA	NA	NA	NA	NA	NA	NA	NA	NA	NA	NA	NA	0.462111
Heart	Olfr1206	-15.024	0.40473	520.78	-4.1627	NA	NA	NA	NA	0	0	0	-1	NA	NA	NA	NA	0.455965	0.257514	0.213984	0.0940178	NA	NA	NA	NA	3.38695	20.9442	20.9948	NA	NA	NA	NA	0.461067
Heart	Ckmt2	69887	-396.47	NA	NA	NA	NA	NA	NA	0	-1	NA	NA	NA	NA	NA	NA	0.144628	0.0531178	NA	NA	NA	NA	NA	NA	3.07548	NA	NA	NA	NA	NA	NA	0.459109
Heart	Tas2r114	-0.72678	0.73572	NA	NA	NA	NA	NA	NA	0	1	NA	NA	NA	NA	NA	NA	0.16207	0.0644215	NA	NA	NA	NA	NA	NA	9.88966	NA	NA	NA	NA	NA	NA	0.455822
Heart	Akr7a5	-9.25961	NA	NA	NA	NA	NA	NA	NA	-1	NA	NA	NA	NA	NA	NA	NA	2.13527e-07	NA	NA	NA	NA	NA	NA	NA	NA	NA	NA	NA	NA	NA	NA	0.455321
Heart	Perp	-12.0174	NA	NA	NA	NA	NA	NA	NA	-1	NA	NA	NA	NA	NA	NA	NA	0.000260597	NA	NA	NA	NA	NA	NA	NA	NA	NA	NA	NA	NA	NA	NA	0.454673
Heart	Slc20a2	-26.2734	NA	NA	NA	NA	NA	NA	NA	-1	NA	NA	NA	NA	NA	NA	NA	7.07541e-07	NA	NA	NA	NA	NA	NA	NA	NA	NA	NA	NA	NA	NA	NA	0.453392
Heart	Col14a1	-4.3882	13.717	NA	NA	NA	NA	NA	NA	0	1	NA	NA	NA	NA	NA	NA	0.16843	0.0953771	NA	NA	NA	NA	NA	NA	17.4445	NA	NA	NA	NA	NA	NA	0.452684
Heart	Cnksr2	1.34809	NA	NA	NA	NA	NA	NA	NA	1	NA	NA	NA	NA	NA	NA	NA	0.00245138	NA	NA	NA	NA	NA	NA	NA	NA	NA	NA	NA	NA	NA	NA	0.451826
Heart	Dnaja3	-23.4433	NA	NA	NA	NA	NA	NA	NA	-1	NA	NA	NA	NA	NA	NA	NA	3.33748e-07	NA	NA	NA	NA	NA	NA	NA	NA	NA	NA	NA	NA	NA	NA	0.451631
Heart	Gsta2	0.643239	NA	NA	NA	NA	NA	NA	NA	1	NA	NA	NA	NA	NA	NA	NA	1.24273e-06	NA	NA	NA	NA	NA	NA	NA	NA	NA	NA	NA	NA	NA	NA	0.450825
Heart	Gm38299	-0.14204	1.2227	NA	NA	NA	NA	NA	NA	0	1	NA	NA	NA	NA	NA	NA	0.273541	0.0695551	NA	NA	NA	NA	NA	NA	17.3676	NA	NA	NA	NA	NA	NA	0.449899
Heart	Tmem182	27.571	-32.304	NA	NA	NA	NA	NA	NA	0	-1	NA	NA	NA	NA	NA	NA	0.191627	0.0683841	NA	NA	NA	NA	NA	NA	9.0492	NA	NA	NA	NA	NA	NA	0.449616
Heart	2010001K21Rik	-0.93921	3.2497	NA	NA	NA	NA	NA	NA	-1	0	NA	NA	NA	NA	NA	NA	0.0751286	0.169507	NA	NA	NA	NA	NA	NA	21.9793	NA	NA	NA	NA	NA	NA	0.448424
Heart	Zfp423	-8.8451	1.4778	NA	NA	NA	NA	NA	NA	0	1	NA	NA	NA	NA	NA	NA	0.104975	0.0872808	NA	NA	NA	NA	NA	NA	8.439	NA	NA	NA	NA	NA	NA	0.448422
Heart	Ccng1	171.19	-263.12	NA	NA	NA	NA	NA	NA	0	-1	NA	NA	NA	NA	NA	NA	0.145281	0.07449	NA	NA	NA	NA	NA	NA	12.3292	NA	NA	NA	NA	NA	NA	0.44814
Heart	Pnpla2	-72.7633	NA	NA	NA	NA	NA	NA	NA	-1	NA	NA	NA	NA	NA	NA	NA	2.87852e-07	NA	NA	NA	NA	NA	NA	NA	NA	NA	NA	NA	NA	NA	NA	0.446258
Heart	Art3	-30.5971	NA	NA	NA	NA	NA	NA	NA	-1	NA	NA	NA	NA	NA	NA	NA	1.22959e-06	NA	NA	NA	NA	NA	NA	NA	NA	NA	NA	NA	NA	NA	NA	0.446177
Heart	Ldhd	0.2629	-17.101	NA	NA	NA	NA	NA	NA	0	-1	NA	NA	NA	NA	NA	NA	0.464362	0.0807318	NA	NA	NA	NA	NA	NA	18.0069	NA	NA	NA	NA	NA	NA	0.44579
Heart	Ighv5-17	-0.090284	0.93983	NA	NA	NA	NA	NA	NA	0	1	NA	NA	NA	NA	NA	NA	0.309869	0.0727246	NA	NA	NA	NA	NA	NA	17.2403	NA	NA	NA	NA	NA	NA	0.445194
Heart	Mrpl44	-5.3357	NA	NA	NA	NA	NA	NA	NA	-1	NA	NA	NA	NA	NA	NA	NA	1.59516e-06	NA	NA	NA	NA	NA	NA	NA	NA	NA	NA	NA	NA	NA	NA	0.444404
Heart	Prodh	-3.61909	NA	NA	NA	NA	NA	NA	NA	-1	NA	NA	NA	NA	NA	NA	NA	5.16955e-07	NA	NA	NA	NA	NA	NA	NA	NA	NA	NA	NA	NA	NA	NA	0.443352
Heart	Ak3	-20.2056	NA	NA	NA	NA	NA	NA	NA	-1	NA	NA	NA	NA	NA	NA	NA	1.71939e-06	NA	NA	NA	NA	NA	NA	NA	NA	NA	NA	NA	NA	NA	NA	0.443132
Heart	Prf1	-0.69396	0.85334	NA	NA	NA	NA	NA	NA	0	1	NA	NA	NA	NA	NA	NA	0.14022	0.0889788	NA	NA	NA	NA	NA	NA	14.7713	NA	NA	NA	NA	NA	NA	0.44162
Heart	Foxred1	-10.2314	NA	NA	NA	NA	NA	NA	NA	-1	NA	NA	NA	NA	NA	NA	NA	1.66294e-06	NA	NA	NA	NA	NA	NA	NA	NA	NA	NA	NA	NA	NA	NA	0.44154
Heart	Msln	-4.7703	NA	NA	NA	NA	NA	NA	NA	-1	NA	NA	NA	NA	NA	NA	NA	5.60392e-07	NA	NA	NA	NA	NA	NA	NA	NA	NA	NA	NA	NA	NA	NA	0.440959
Heart	Gpsm1	-22.2894	NA	NA	NA	NA	NA	NA	NA	-1	NA	NA	NA	NA	NA	NA	NA	1.6322e-06	NA	NA	NA	NA	NA	NA	NA	NA	NA	NA	NA	NA	NA	NA	0.440327
Heart	Mlycd	-33.8268	NA	NA	NA	NA	NA	NA	NA	-1	NA	NA	NA	NA	NA	NA	NA	3.75589e-07	NA	NA	NA	NA	NA	NA	NA	NA	NA	NA	NA	NA	NA	NA	0.438655
Heart	Cd99l2	-0.88641	-21.654	NA	NA	NA	NA	NA	NA	0	-1	NA	NA	NA	NA	NA	NA	0.434323	0.0994402	NA	NA	NA	NA	NA	NA	15.4975	NA	NA	NA	NA	NA	NA	0.438228
Heart	Prl2a1	-0.14716	19.878	-315.03	191.25	-2.3546	NA	NA	NA	0	0	-1	1	0	NA	NA	NA	0.348446	0.379175	0.0961007	0.0905815	0.128165	NA	NA	NA	14.7403	17.7997	19.118	21.0555	NA	NA	NA	0.43743
Heart	Shtn1	1.8598	-11.719	NA	NA	NA	NA	NA	NA	1	0	NA	NA	NA	NA	NA	NA	0.0512808	0.486508	NA	NA	NA	NA	NA	NA	25.1707	NA	NA	NA	NA	NA	NA	0.435957
Heart	Hibch	17.656	-14.925	NA	NA	NA	NA	NA	NA	0	-1	NA	NA	NA	NA	NA	NA	0.138396	0.0641985	NA	NA	NA	NA	NA	NA	9.83859	NA	NA	NA	NA	NA	NA	0.434142
Heart	Gm8446	0.239215	NA	NA	NA	NA	NA	NA	NA	1	NA	NA	NA	NA	NA	NA	NA	0.000840942	NA	NA	NA	NA	NA	NA	NA	NA	NA	NA	NA	NA	NA	NA	0.433789
Heart	Mmaa	-5.86059	NA	NA	NA	NA	NA	NA	NA	-1	NA	NA	NA	NA	NA	NA	NA	4.36174e-07	NA	NA	NA	NA	NA	NA	NA	NA	NA	NA	NA	NA	NA	NA	0.433686
Heart	Trmt2b	1.1203	-16.717	NA	NA	NA	NA	NA	NA	0	-1	NA	NA	NA	NA	NA	NA	0.375259	0.0832918	NA	NA	NA	NA	NA	NA	16.4827	NA	NA	NA	NA	NA	NA	0.431858
Heart	Rmc1	-5.14365	NA	NA	NA	NA	NA	NA	NA	-1	NA	NA	NA	NA	NA	NA	NA	6.57099e-07	NA	NA	NA	NA	NA	NA	NA	NA	NA	NA	NA	NA	NA	NA	0.430741
Heart	Slitrk2	0.395976	NA	NA	NA	NA	NA	NA	NA	1	NA	NA	NA	NA	NA	NA	NA	0.0111815	NA	NA	NA	NA	NA	NA	NA	NA	NA	NA	NA	NA	NA	NA	0.430368
Heart	Usp13	-27.8371	NA	NA	NA	NA	NA	NA	NA	-1	NA	NA	NA	NA	NA	NA	NA	3.04678e-06	NA	NA	NA	NA	NA	NA	NA	NA	NA	NA	NA	NA	NA	NA	0.428945
Heart	Agtpbp1	-13.7005	NA	NA	NA	NA	NA	NA	NA	-1	NA	NA	NA	NA	NA	NA	NA	5.28203e-07	NA	NA	NA	NA	NA	NA	NA	NA	NA	NA	NA	NA	NA	NA	0.428928
Heart	Med16	-5.56904	NA	NA	NA	NA	NA	NA	NA	-1	NA	NA	NA	NA	NA	NA	NA	0.000734025	NA	NA	NA	NA	NA	NA	NA	NA	NA	NA	NA	NA	NA	NA	0.425828
Heart	Cxcl14	4.10209	NA	NA	NA	NA	NA	NA	NA	1	NA	NA	NA	NA	NA	NA	NA	0.0230681	NA	NA	NA	NA	NA	NA	NA	NA	NA	NA	NA	NA	NA	NA	0.42481
Heart	Cd6	0.13549	335.12	NA	NA	NA	NA	NA	NA	0	1	NA	NA	NA	NA	NA	NA	0.228254	0.0992422	NA	NA	NA	NA	NA	NA	26.9508	NA	NA	NA	NA	NA	NA	0.424786
Heart	Ythdc2	-754.51	2.7217	NA	NA	NA	NA	NA	NA	0	1	NA	NA	NA	NA	NA	NA	0.129768	0.0732359	NA	NA	NA	NA	NA	NA	3.08741	NA	NA	NA	NA	NA	NA	0.422673
Heart	Klra9	1.33017	NA	NA	NA	NA	NA	NA	NA	1	NA	NA	NA	NA	NA	NA	NA	9.35907e-07	NA	NA	NA	NA	NA	NA	NA	NA	NA	NA	NA	NA	NA	NA	0.422573
Heart	Cdkl5	1.38082	NA	NA	NA	NA	NA	NA	NA	1	NA	NA	NA	NA	NA	NA	NA	0.00812207	NA	NA	NA	NA	NA	NA	NA	NA	NA	NA	NA	NA	NA	NA	0.422123
Heart	Sesn1	-37.681	NA	NA	NA	NA	NA	NA	NA	-1	NA	NA	NA	NA	NA	NA	NA	1.09493e-06	NA	NA	NA	NA	NA	NA	NA	NA	NA	NA	NA	NA	NA	NA	0.421651
Heart	Gcdh	4.0144	-20.72	NA	NA	NA	NA	NA	NA	0	-1	NA	NA	NA	NA	NA	NA	0.237499	0.091537	NA	NA	NA	NA	NA	NA	15.2411	NA	NA	NA	NA	NA	NA	0.41995
Heart	Zbp1	0.812348	NA	NA	NA	NA	NA	NA	NA	1	NA	NA	NA	NA	NA	NA	NA	2.8298e-05	NA	NA	NA	NA	NA	NA	NA	NA	NA	NA	NA	NA	NA	NA	0.419902
Heart	Bves	-7.89253	NA	NA	NA	NA	NA	NA	NA	-1	NA	NA	NA	NA	NA	NA	NA	1.30157e-06	NA	NA	NA	NA	NA	NA	NA	NA	NA	NA	NA	NA	NA	NA	0.419521
Heart	Cd209f	3.98265	NA	NA	NA	NA	NA	NA	NA	1	NA	NA	NA	NA	NA	NA	NA	1.41019e-06	NA	NA	NA	NA	NA	NA	NA	NA	NA	NA	NA	NA	NA	NA	0.419049
Heart	Tmprss13	2.5907	-3.7701	NA	NA	NA	NA	NA	NA	1	0	NA	NA	NA	NA	NA	NA	0.0664654	0.144794	NA	NA	NA	NA	NA	NA	20.9528	NA	NA	NA	NA	NA	NA	0.418983
Heart	Gimap3	-4.9817	1.5328	NA	NA	NA	NA	NA	NA	0	1	NA	NA	NA	NA	NA	NA	0.488375	0.0548446	NA	NA	NA	NA	NA	NA	5.90287	NA	NA	NA	NA	NA	NA	0.418794
Heart	Gm37109	1.9168	-1.5386	4.2906	-2.8173	NA	NA	NA	NA	0	0	1	0	NA	NA	NA	NA	0.189925	0.116585	0.0960388	0.150079	NA	NA	NA	NA	8.26403	16.8978	21.6453	NA	NA	NA	NA	0.418637
Heart	1700065D16Rik	0.020832	3.5312	NA	NA	NA	NA	NA	NA	0	1	NA	NA	NA	NA	NA	NA	0.434478	0.0748356	NA	NA	NA	NA	NA	NA	23.83	NA	NA	NA	NA	NA	NA	0.41862
Heart	Timm44	-8.22153	NA	NA	NA	NA	NA	NA	NA	-1	NA	NA	NA	NA	NA	NA	NA	8.71416e-06	NA	NA	NA	NA	NA	NA	NA	NA	NA	NA	NA	NA	NA	NA	0.418462
Heart	Ly86	-0.053125	3.3077	NA	NA	NA	NA	NA	NA	0	1	NA	NA	NA	NA	NA	NA	0.481814	0.0739833	NA	NA	NA	NA	NA	NA	14.9435	NA	NA	NA	NA	NA	NA	0.416981
Heart	Pah	1.07213	NA	NA	NA	NA	NA	NA	NA	1	NA	NA	NA	NA	NA	NA	NA	1.89913e-06	NA	NA	NA	NA	NA	NA	NA	NA	NA	NA	NA	NA	NA	NA	0.416614
Heart	Dlst	-80.2635	NA	NA	NA	NA	NA	NA	NA	-1	NA	NA	NA	NA	NA	NA	NA	1.10584e-05	NA	NA	NA	NA	NA	NA	NA	NA	NA	NA	NA	NA	NA	NA	0.41645
Heart	Antxr1	1.28689	NA	NA	NA	NA	NA	NA	NA	1	NA	NA	NA	NA	NA	NA	NA	0.000272668	NA	NA	NA	NA	NA	NA	NA	NA	NA	NA	NA	NA	NA	NA	0.415842
Heart	Scn4b	20.432	-19.848	NA	NA	NA	NA	NA	NA	1	0	NA	NA	NA	NA	NA	NA	0.073761	0.199921	NA	NA	NA	NA	NA	NA	20.1733	NA	NA	NA	NA	NA	NA	0.415741
Heart	Ttc39b	3.00351	NA	NA	NA	NA	NA	NA	NA	1	NA	NA	NA	NA	NA	NA	NA	2.70553e-06	NA	NA	NA	NA	NA	NA	NA	NA	NA	NA	NA	NA	NA	NA	0.415415
Heart	Isca1	-22.6188	NA	NA	NA	NA	NA	NA	NA	-1	NA	NA	NA	NA	NA	NA	NA	9.42797e-07	NA	NA	NA	NA	NA	NA	NA	NA	NA	NA	NA	NA	NA	NA	0.414921
Heart	Loxl1	-26.052	2.1107	NA	NA	NA	NA	NA	NA	-1	0	NA	NA	NA	NA	NA	NA	0.0719011	0.433055	NA	NA	NA	NA	NA	NA	15.272	NA	NA	NA	NA	NA	NA	0.414381
Heart	Srl	-80.5265	NA	NA	NA	NA	NA	NA	NA	-1	NA	NA	NA	NA	NA	NA	NA	5.64983e-06	NA	NA	NA	NA	NA	NA	NA	NA	NA	NA	NA	NA	NA	NA	0.414293
Heart	Afg1l	-4.83807	NA	NA	NA	NA	NA	NA	NA	-1	NA	NA	NA	NA	NA	NA	NA	1.09863e-06	NA	NA	NA	NA	NA	NA	NA	NA	NA	NA	NA	NA	NA	NA	0.413933
Heart	Hspd1	-38.7124	NA	NA	NA	NA	NA	NA	NA	-1	NA	NA	NA	NA	NA	NA	NA	9.19369e-07	NA	NA	NA	NA	NA	NA	NA	NA	NA	NA	NA	NA	NA	NA	0.413901
Heart	Parp3	4.09808	NA	NA	NA	NA	NA	NA	NA	1	NA	NA	NA	NA	NA	NA	NA	0.00872842	NA	NA	NA	NA	NA	NA	NA	NA	NA	NA	NA	NA	NA	NA	0.413082
Heart	Eif4a2	5.3729	-45.883	NA	NA	NA	NA	NA	NA	0	-1	NA	NA	NA	NA	NA	NA	0.342261	0.0933296	NA	NA	NA	NA	NA	NA	15.0469	NA	NA	NA	NA	NA	NA	0.41299
Heart	Rpl3l	-22.9152	NA	NA	NA	NA	NA	NA	NA	-1	NA	NA	NA	NA	NA	NA	NA	2.13635e-06	NA	NA	NA	NA	NA	NA	NA	NA	NA	NA	NA	NA	NA	NA	0.411717
Heart	2310002L09Rik	33.06	-13.251	NA	NA	NA	NA	NA	NA	1	0	NA	NA	NA	NA	NA	NA	0.0782384	0.139437	NA	NA	NA	NA	NA	NA	14.2446	NA	NA	NA	NA	NA	NA	0.410902
Heart	Snhg11	3.68381	NA	NA	NA	NA	NA	NA	NA	1	NA	NA	NA	NA	NA	NA	NA	8.41469e-06	NA	NA	NA	NA	NA	NA	NA	NA	NA	NA	NA	NA	NA	NA	0.410829
Heart	Gspt2	0.33577	NA	NA	NA	NA	NA	NA	NA	1	NA	NA	NA	NA	NA	NA	NA	0.0210752	NA	NA	NA	NA	NA	NA	NA	NA	NA	NA	NA	NA	NA	NA	0.41051
Heart	Acot1	-6.40086	NA	NA	NA	NA	NA	NA	NA	-1	NA	NA	NA	NA	NA	NA	NA	4.09781e-06	NA	NA	NA	NA	NA	NA	NA	NA	NA	NA	NA	NA	NA	NA	0.409784
Heart	Frmd7	0.447642	NA	NA	NA	NA	NA	NA	NA	1	NA	NA	NA	NA	NA	NA	NA	0.00627262	NA	NA	NA	NA	NA	NA	NA	NA	NA	NA	NA	NA	NA	NA	0.409655
Heart	Slc38a4	-23.35	0.67013	NA	NA	NA	NA	NA	NA	-1	0	NA	NA	NA	NA	NA	NA	0.0835632	0.290872	NA	NA	NA	NA	NA	NA	6.65611	NA	NA	NA	NA	NA	NA	0.409297
Heart	Tmem70	-12.7461	NA	NA	NA	NA	NA	NA	NA	-1	NA	NA	NA	NA	NA	NA	NA	1.63765e-06	NA	NA	NA	NA	NA	NA	NA	NA	NA	NA	NA	NA	NA	NA	0.408133
Heart	Naip5	-0.12664	2.3924	NA	NA	NA	NA	NA	NA	0	1	NA	NA	NA	NA	NA	NA	0.406651	0.0896968	NA	NA	NA	NA	NA	NA	16.3608	NA	NA	NA	NA	NA	NA	0.407368
Heart	Atp1a2	-69.8414	NA	NA	NA	NA	NA	NA	NA	-1	NA	NA	NA	NA	NA	NA	NA	3.29284e-06	NA	NA	NA	NA	NA	NA	NA	NA	NA	NA	NA	NA	NA	NA	0.407101
Heart	Fbxo6	-4.11288	NA	NA	NA	NA	NA	NA	NA	-1	NA	NA	NA	NA	NA	NA	NA	3.06399e-06	NA	NA	NA	NA	NA	NA	NA	NA	NA	NA	NA	NA	NA	NA	0.406502
Heart	Tmtc2	-6.8183	2.5899	NA	NA	NA	NA	NA	NA	0	1	NA	NA	NA	NA	NA	NA	0.157029	0.0611001	NA	NA	NA	NA	NA	NA	6.71248	NA	NA	NA	NA	NA	NA	0.406071
Heart	Rbpms2	-7.20892	NA	NA	NA	NA	NA	NA	NA	-1	NA	NA	NA	NA	NA	NA	NA	1.23308e-06	NA	NA	NA	NA	NA	NA	NA	NA	NA	NA	NA	NA	NA	NA	0.405837
Heart	Psmc2	-7.69877	NA	NA	NA	NA	NA	NA	NA	-1	NA	NA	NA	NA	NA	NA	NA	1.51105e-06	NA	NA	NA	NA	NA	NA	NA	NA	NA	NA	NA	NA	NA	NA	0.405591
Heart	Pank1	-11.5867	NA	NA	NA	NA	NA	NA	NA	-1	NA	NA	NA	NA	NA	NA	NA	2.01944e-06	NA	NA	NA	NA	NA	NA	NA	NA	NA	NA	NA	NA	NA	NA	0.405123
Heart	Myo1f	-0.60074	6.809	NA	NA	NA	NA	NA	NA	0	1	NA	NA	NA	NA	NA	NA	0.360638	0.0960501	NA	NA	NA	NA	NA	NA	15.659	NA	NA	NA	NA	NA	NA	0.403254
Heart	Adhfe1	-12.1276	NA	NA	NA	NA	NA	NA	NA	-1	NA	NA	NA	NA	NA	NA	NA	4.6424e-06	NA	NA	NA	NA	NA	NA	NA	NA	NA	NA	NA	NA	NA	NA	0.403003
Heart	Abcb10	-7.40448	NA	NA	NA	NA	NA	NA	NA	-1	NA	NA	NA	NA	NA	NA	NA	2.78587e-05	NA	NA	NA	NA	NA	NA	NA	NA	NA	NA	NA	NA	NA	NA	0.40167
Heart	Pdha1	35.984	-259.91	NA	NA	NA	NA	NA	NA	0	-1	NA	NA	NA	NA	NA	NA	0.364378	0.0714441	NA	NA	NA	NA	NA	NA	14.4351	NA	NA	NA	NA	NA	NA	0.400857
Heart	Slc48a1	-8.69989	NA	NA	NA	NA	NA	NA	NA	-1	NA	NA	NA	NA	NA	NA	NA	5.95785e-05	NA	NA	NA	NA	NA	NA	NA	NA	NA	NA	NA	NA	NA	NA	0.400396
Heart	Cntn5	2.04182	NA	NA	NA	NA	NA	NA	NA	1	NA	NA	NA	NA	NA	NA	NA	6.73492e-05	NA	NA	NA	NA	NA	NA	NA	NA	NA	NA	NA	NA	NA	NA	0.399909
Heart	Gm28919	0.273669	NA	NA	NA	NA	NA	NA	NA	1	NA	NA	NA	NA	NA	NA	NA	0.00610794	NA	NA	NA	NA	NA	NA	NA	NA	NA	NA	NA	NA	NA	NA	0.399731
Heart	Gm42481	0.385518	NA	NA	NA	NA	NA	NA	NA	1	NA	NA	NA	NA	NA	NA	NA	0.0167813	NA	NA	NA	NA	NA	NA	NA	NA	NA	NA	NA	NA	NA	NA	0.399177
Heart	Cd72	1.16582	NA	NA	NA	NA	NA	NA	NA	1	NA	NA	NA	NA	NA	NA	NA	2.52496e-06	NA	NA	NA	NA	NA	NA	NA	NA	NA	NA	NA	NA	NA	NA	0.398884
Heart	Mapre2	-11.0354	NA	NA	NA	NA	NA	NA	NA	-1	NA	NA	NA	NA	NA	NA	NA	2.82279e-05	NA	NA	NA	NA	NA	NA	NA	NA	NA	NA	NA	NA	NA	NA	0.398162
Heart	Prune2	148.86	-77.663	NA	NA	NA	NA	NA	NA	1	0	NA	NA	NA	NA	NA	NA	0.0883914	0.123553	NA	NA	NA	NA	NA	NA	14.5425	NA	NA	NA	NA	NA	NA	0.396791
Heart	Ifi213	1.51288	NA	NA	NA	NA	NA	NA	NA	1	NA	NA	NA	NA	NA	NA	NA	1.84414e-05	NA	NA	NA	NA	NA	NA	NA	NA	NA	NA	NA	NA	NA	NA	0.396501
Heart	Gm18529	0.02006	1.4056	NA	NA	NA	NA	NA	NA	0	1	NA	NA	NA	NA	NA	NA	0.454614	0.0919537	NA	NA	NA	NA	NA	NA	19.5438	NA	NA	NA	NA	NA	NA	0.395617
Heart	Scyl1	-8.3228	NA	NA	NA	NA	NA	NA	NA	-1	NA	NA	NA	NA	NA	NA	NA	2.60698e-05	NA	NA	NA	NA	NA	NA	NA	NA	NA	NA	NA	NA	NA	NA	0.395478
Heart	C130093G08Rik	-0.99132	0.50903	NA	NA	NA	NA	NA	NA	0	1	NA	NA	NA	NA	NA	NA	0.230849	0.0749237	NA	NA	NA	NA	NA	NA	8.35983	NA	NA	NA	NA	NA	NA	0.395467
Heart	Zfp105	-0.90483	3.2739	NA	NA	NA	NA	NA	NA	0	1	NA	NA	NA	NA	NA	NA	0.152566	0.0743311	NA	NA	NA	NA	NA	NA	17.0302	NA	NA	NA	NA	NA	NA	0.395461
Heart	Acad9	-6.53327	NA	NA	NA	NA	NA	NA	NA	-1	NA	NA	NA	NA	NA	NA	NA	2.12998e-06	NA	NA	NA	NA	NA	NA	NA	NA	NA	NA	NA	NA	NA	NA	0.395004
Heart	Ung	-4.62031	NA	NA	NA	NA	NA	NA	NA	-1	NA	NA	NA	NA	NA	NA	NA	2.13071e-05	NA	NA	NA	NA	NA	NA	NA	NA	NA	NA	NA	NA	NA	NA	0.394112
Heart	Ephx2	-31.3953	NA	NA	NA	NA	NA	NA	NA	-1	NA	NA	NA	NA	NA	NA	NA	1.55648e-05	NA	NA	NA	NA	NA	NA	NA	NA	NA	NA	NA	NA	NA	NA	0.393767
Heart	Ube2d3	40.659	-81.761	NA	NA	NA	NA	NA	NA	0	-1	NA	NA	NA	NA	NA	NA	0.171279	0.0695745	NA	NA	NA	NA	NA	NA	13.4117	NA	NA	NA	NA	NA	NA	0.3932
Heart	Brwd3	1.27409	NA	NA	NA	NA	NA	NA	NA	1	NA	NA	NA	NA	NA	NA	NA	0.0352134	NA	NA	NA	NA	NA	NA	NA	NA	NA	NA	NA	NA	NA	NA	0.3927
Heart	Gm21188	1.35669	NA	NA	NA	NA	NA	NA	NA	1	NA	NA	NA	NA	NA	NA	NA	4.92074e-06	NA	NA	NA	NA	NA	NA	NA	NA	NA	NA	NA	NA	NA	NA	0.392488
Heart	Cyb5d2	21.405	-4.2753	NA	NA	NA	NA	NA	NA	0	-1	NA	NA	NA	NA	NA	NA	0.483637	0.0598782	NA	NA	NA	NA	NA	NA	5.7175	NA	NA	NA	NA	NA	NA	0.390534
Heart	Irf5	-262.78	2.2847	NA	NA	NA	NA	NA	NA	0	1	NA	NA	NA	NA	NA	NA	0.222032	0.0593289	NA	NA	NA	NA	NA	NA	3.0974	NA	NA	NA	NA	NA	NA	0.388867
Heart	Kcnip2	-29.7063	NA	NA	NA	NA	NA	NA	NA	-1	NA	NA	NA	NA	NA	NA	NA	3.15918e-06	NA	NA	NA	NA	NA	NA	NA	NA	NA	NA	NA	NA	NA	NA	0.388845
Heart	Slc25a12	0.48164	-56.57	NA	NA	NA	NA	NA	NA	0	-1	NA	NA	NA	NA	NA	NA	0.485911	0.0972509	NA	NA	NA	NA	NA	NA	17.1075	NA	NA	NA	NA	NA	NA	0.388195
Heart	Gm4951	-0.19303	2.8463	NA	NA	NA	NA	NA	NA	0	1	NA	NA	NA	NA	NA	NA	0.41156	0.0892072	NA	NA	NA	NA	NA	NA	15.0502	NA	NA	NA	NA	NA	NA	0.388188
Heart	Slc25a4	-557.857	NA	NA	NA	NA	NA	NA	NA	-1	NA	NA	NA	NA	NA	NA	NA	4.58749e-06	NA	NA	NA	NA	NA	NA	NA	NA	NA	NA	NA	NA	NA	NA	0.387558
Heart	Gm11925	-0.22085	6.507	-0.98557	NA	NA	NA	NA	NA	0	0	-1	NA	NA	NA	NA	NA	0.144549	0.432462	0.0817852	NA	NA	NA	NA	NA	17.5206	18.9542	NA	NA	NA	NA	NA	0.387364
Heart	Tmem150a	-3.55308	NA	NA	NA	NA	NA	NA	NA	-1	NA	NA	NA	NA	NA	NA	NA	3.2974e-06	NA	NA	NA	NA	NA	NA	NA	NA	NA	NA	NA	NA	NA	NA	0.386863
Heart	Tspan7	-11.1842	NA	NA	NA	NA	NA	NA	NA	-1	NA	NA	NA	NA	NA	NA	NA	8.29167e-05	NA	NA	NA	NA	NA	NA	NA	NA	NA	NA	NA	NA	NA	NA	0.385904
Heart	Cct7	-18.5549	NA	NA	NA	NA	NA	NA	NA	-1	NA	NA	NA	NA	NA	NA	NA	2.58921e-06	NA	NA	NA	NA	NA	NA	NA	NA	NA	NA	NA	NA	NA	NA	0.385577
Heart	Eci1	-36.3823	NA	NA	NA	NA	NA	NA	NA	-1	NA	NA	NA	NA	NA	NA	NA	1.15319e-05	NA	NA	NA	NA	NA	NA	NA	NA	NA	NA	NA	NA	NA	NA	0.384808
Heart	Chpt1	49.516	-97.401	NA	NA	NA	NA	NA	NA	0	-1	NA	NA	NA	NA	NA	NA	0.198122	0.0844819	NA	NA	NA	NA	NA	NA	14.9432	NA	NA	NA	NA	NA	NA	0.384767
Heart	Pcdhb14	1.97341	NA	NA	NA	NA	NA	NA	NA	1	NA	NA	NA	NA	NA	NA	NA	2.74074e-06	NA	NA	NA	NA	NA	NA	NA	NA	NA	NA	NA	NA	NA	NA	0.38386
Heart	Slc7a2	1.78645	NA	NA	NA	NA	NA	NA	NA	1	NA	NA	NA	NA	NA	NA	NA	2.78818e-06	NA	NA	NA	NA	NA	NA	NA	NA	NA	NA	NA	NA	NA	NA	0.382965
Heart	Kyat1	4.8281	-6.4176	NA	NA	NA	NA	NA	NA	0	-1	NA	NA	NA	NA	NA	NA	0.220491	0.0726561	NA	NA	NA	NA	NA	NA	9.9947	NA	NA	NA	NA	NA	NA	0.382415
Heart	Armcx3	-3.3248	11.192	NA	NA	NA	NA	NA	NA	-1	0	NA	NA	NA	NA	NA	NA	0.063901	0.150752	NA	NA	NA	NA	NA	NA	23.2385	NA	NA	NA	NA	NA	NA	0.38231
Heart	Npepl1	-6.00997	NA	NA	NA	NA	NA	NA	NA	-1	NA	NA	NA	NA	NA	NA	NA	0.00078101	NA	NA	NA	NA	NA	NA	NA	NA	NA	NA	NA	NA	NA	NA	0.382275
Heart	Rbm3	4.59371	NA	NA	NA	NA	NA	NA	NA	1	NA	NA	NA	NA	NA	NA	NA	0.000244489	NA	NA	NA	NA	NA	NA	NA	NA	NA	NA	NA	NA	NA	NA	0.381299
Heart	Acss3	-1.2567	2.1828	NA	NA	NA	NA	NA	NA	0	1	NA	NA	NA	NA	NA	NA	0.181015	0.0754607	NA	NA	NA	NA	NA	NA	12.0375	NA	NA	NA	NA	NA	NA	0.381075
Heart	Rit1	-7.6511	NA	NA	NA	NA	NA	NA	NA	-1	NA	NA	NA	NA	NA	NA	NA	6.68857e-06	NA	NA	NA	NA	NA	NA	NA	NA	NA	NA	NA	NA	NA	NA	0.381053
Heart	Sv2b	-0.2098	2.7755	NA	NA	NA	NA	NA	NA	0	1	NA	NA	NA	NA	NA	NA	0.427992	0.0767169	NA	NA	NA	NA	NA	NA	14.3413	NA	NA	NA	NA	NA	NA	0.380816
Heart	Mgrn1	-25.9675	NA	NA	NA	NA	NA	NA	NA	-1	NA	NA	NA	NA	NA	NA	NA	0.00043494	NA	NA	NA	NA	NA	NA	NA	NA	NA	NA	NA	NA	NA	NA	0.380746
Heart	Eci2	-15.3976	NA	NA	NA	NA	NA	NA	NA	-1	NA	NA	NA	NA	NA	NA	NA	5.96371e-06	NA	NA	NA	NA	NA	NA	NA	NA	NA	NA	NA	NA	NA	NA	0.379675
Heart	Oas1a	-0.82392	3.2009	NA	NA	NA	NA	NA	NA	0	1	NA	NA	NA	NA	NA	NA	0.195523	0.0927167	NA	NA	NA	NA	NA	NA	15.8783	NA	NA	NA	NA	NA	NA	0.379524
Heart	Cd209g	1.25967	NA	NA	NA	NA	NA	NA	NA	1	NA	NA	NA	NA	NA	NA	NA	4.6436e-06	NA	NA	NA	NA	NA	NA	NA	NA	NA	NA	NA	NA	NA	NA	0.378464
Heart	Ubl3	-0.66469	-25.355	NA	NA	NA	NA	NA	NA	0	-1	NA	NA	NA	NA	NA	NA	0.454844	0.0936899	NA	NA	NA	NA	NA	NA	17.1193	NA	NA	NA	NA	NA	NA	0.378349
Heart	Kbtbd12	0.78999	-9.7308	NA	NA	NA	NA	NA	NA	0	-1	NA	NA	NA	NA	NA	NA	0.418883	0.0729391	NA	NA	NA	NA	NA	NA	14.9435	NA	NA	NA	NA	NA	NA	0.378278
Heart	Prkab2	-4.9394	NA	NA	NA	NA	NA	NA	NA	-1	NA	NA	NA	NA	NA	NA	NA	0.0351727	NA	NA	NA	NA	NA	NA	NA	NA	NA	NA	NA	NA	NA	NA	0.378218
Heart	4930415L06Rik	0.31243	NA	NA	NA	NA	NA	NA	NA	1	NA	NA	NA	NA	NA	NA	NA	0.0275703	NA	NA	NA	NA	NA	NA	NA	NA	NA	NA	NA	NA	NA	NA	0.377858
Heart	Fitm2	4.6255	-79.02	NA	NA	NA	NA	NA	NA	0	-1	NA	NA	NA	NA	NA	NA	0.402636	0.0945576	NA	NA	NA	NA	NA	NA	16.2982	NA	NA	NA	NA	NA	NA	0.377746
Heart	Sar1a	81.025	-30.183	NA	NA	NA	NA	NA	NA	0	-1	NA	NA	NA	NA	NA	NA	0.159154	0.0632321	NA	NA	NA	NA	NA	NA	7.64861	NA	NA	NA	NA	NA	NA	0.377709
Heart	Ecsit	-10.8731	NA	NA	NA	NA	NA	NA	NA	-1	NA	NA	NA	NA	NA	NA	NA	1.52093e-05	NA	NA	NA	NA	NA	NA	NA	NA	NA	NA	NA	NA	NA	NA	0.377351
Heart	Obp1b	0.137174	NA	NA	NA	NA	NA	NA	NA	1	NA	NA	NA	NA	NA	NA	NA	0.0201102	NA	NA	NA	NA	NA	NA	NA	NA	NA	NA	NA	NA	NA	NA	0.376796
Heart	Lypd6	1.19526	NA	NA	NA	NA	NA	NA	NA	1	NA	NA	NA	NA	NA	NA	NA	3.7862e-05	NA	NA	NA	NA	NA	NA	NA	NA	NA	NA	NA	NA	NA	NA	0.376729
Heart	Pdhx	1943.6	-19.835	NA	NA	NA	NA	NA	NA	0	-1	NA	NA	NA	NA	NA	NA	0.281945	0.0733553	NA	NA	NA	NA	NA	NA	3.14972	NA	NA	NA	NA	NA	NA	0.376414
Heart	Xdh	-6947.8	13738	-1136.1	1.4087	NA	NA	NA	NA	0	1	0	0	NA	NA	NA	NA	0.165681	0.0932048	0.403241	0.463617	NA	NA	NA	NA	4.94966	6.1987	9.32702	NA	NA	NA	NA	0.375894
Heart	Klhdc3	-8.16792	NA	NA	NA	NA	NA	NA	NA	-1	NA	NA	NA	NA	NA	NA	NA	3.59751e-06	NA	NA	NA	NA	NA	NA	NA	NA	NA	NA	NA	NA	NA	NA	0.3753
Heart	Crat	-11.276	-242.79	NA	NA	NA	NA	NA	NA	0	-1	NA	NA	NA	NA	NA	NA	0.40592	0.0991076	NA	NA	NA	NA	NA	NA	18.007	NA	NA	NA	NA	NA	NA	0.375168
Heart	Acbd4	-2.88333	NA	NA	NA	NA	NA	NA	NA	-1	NA	NA	NA	NA	NA	NA	NA	2.88138e-05	NA	NA	NA	NA	NA	NA	NA	NA	NA	NA	NA	NA	NA	NA	0.374877
Heart	Drd2	-9.29	-0.38899	NA	NA	NA	NA	NA	NA	-1	0	NA	NA	NA	NA	NA	NA	0.0984781	0.25748	NA	NA	NA	NA	NA	NA	6.32149	NA	NA	NA	NA	NA	NA	0.374849
Heart	Cdk6	-4.0412	8.7385	NA	NA	NA	NA	NA	NA	-1	1	NA	NA	NA	NA	NA	NA	0.0819025	0.0799989	NA	NA	NA	NA	NA	NA	18.0262	NA	NA	NA	NA	NA	NA	0.374662
Heart	Gm7609	0.740409	NA	NA	NA	NA	NA	NA	NA	1	NA	NA	NA	NA	NA	NA	NA	5.03988e-06	NA	NA	NA	NA	NA	NA	NA	NA	NA	NA	NA	NA	NA	NA	0.374439
Heart	Ptprj	-362.5	2.696	NA	NA	NA	NA	NA	NA	0	1	NA	NA	NA	NA	NA	NA	0.206301	0.0625842	NA	NA	NA	NA	NA	NA	3.11348	NA	NA	NA	NA	NA	NA	0.374038
Heart	Prkaa2	15.6	-45.985	NA	NA	NA	NA	NA	NA	0	-1	NA	NA	NA	NA	NA	NA	0.139032	0.0814331	NA	NA	NA	NA	NA	NA	16.8909	NA	NA	NA	NA	NA	NA	0.373622
Heart	Thsd7a	3.30933	NA	NA	NA	NA	NA	NA	NA	1	NA	NA	NA	NA	NA	NA	NA	6.5909e-05	NA	NA	NA	NA	NA	NA	NA	NA	NA	NA	NA	NA	NA	NA	0.373486
Heart	Slamf7	1.03637	NA	NA	NA	NA	NA	NA	NA	1	NA	NA	NA	NA	NA	NA	NA	4.53627e-06	NA	NA	NA	NA	NA	NA	NA	NA	NA	NA	NA	NA	NA	NA	0.373413
Heart	Pcdh11x	1.16947	NA	NA	NA	NA	NA	NA	NA	1	NA	NA	NA	NA	NA	NA	NA	0.0048801	NA	NA	NA	NA	NA	NA	NA	NA	NA	NA	NA	NA	NA	NA	0.37255
Heart	Phb2	-20.5057	NA	NA	NA	NA	NA	NA	NA	-1	NA	NA	NA	NA	NA	NA	NA	1.9658e-05	NA	NA	NA	NA	NA	NA	NA	NA	NA	NA	NA	NA	NA	NA	0.372503
Heart	Mageb18	0.223096	NA	NA	NA	NA	NA	NA	NA	1	NA	NA	NA	NA	NA	NA	NA	0.0287533	NA	NA	NA	NA	NA	NA	NA	NA	NA	NA	NA	NA	NA	NA	0.372202
Heart	Xaf1	0.0012188	1381.7	NA	NA	NA	NA	NA	NA	0	1	NA	NA	NA	NA	NA	NA	0.499137	0.0920157	NA	NA	NA	NA	NA	NA	26.9582	NA	NA	NA	NA	NA	NA	0.372008
Heart	Mef2c	5.66118	NA	NA	NA	NA	NA	NA	NA	1	NA	NA	NA	NA	NA	NA	NA	3.60797e-05	NA	NA	NA	NA	NA	NA	NA	NA	NA	NA	NA	NA	NA	NA	0.371543
Heart	Cd79b	-0.22833	5.3786	NA	NA	NA	NA	NA	NA	0	1	NA	NA	NA	NA	NA	NA	0.229552	0.0975397	NA	NA	NA	NA	NA	NA	23.2107	NA	NA	NA	NA	NA	NA	0.37113
Heart	Slc22a3	4.3771	-11.257	NA	NA	NA	NA	NA	NA	1	0	NA	NA	NA	NA	NA	NA	0.0801606	0.103054	NA	NA	NA	NA	NA	NA	21.0105	NA	NA	NA	NA	NA	NA	0.370199
Heart	5330434G04Rik	0.552256	NA	NA	NA	NA	NA	NA	NA	1	NA	NA	NA	NA	NA	NA	NA	0.0372624	NA	NA	NA	NA	NA	NA	NA	NA	NA	NA	NA	NA	NA	NA	0.370198
Heart	Brs3	0.308554	NA	NA	NA	NA	NA	NA	NA	1	NA	NA	NA	NA	NA	NA	NA	0.00613777	NA	NA	NA	NA	NA	NA	NA	NA	NA	NA	NA	NA	NA	NA	0.369885
Heart	Olfr964-ps1	-0.13127	3.0852	-0.90813	NA	NA	NA	NA	NA	0	0	-1	NA	NA	NA	NA	NA	0.205434	0.472569	0.0811224	NA	NA	NA	NA	NA	17.4593	19.7902	NA	NA	NA	NA	NA	0.369562
Heart	Pnpla8	4.1569	-38.661	NA	NA	NA	NA	NA	NA	0	-1	NA	NA	NA	NA	NA	NA	0.321639	0.0873836	NA	NA	NA	NA	NA	NA	17.0707	NA	NA	NA	NA	NA	NA	0.369439
Heart	H2-Eb1	15.8315	NA	NA	NA	NA	NA	NA	NA	1	NA	NA	NA	NA	NA	NA	NA	5.06526e-06	NA	NA	NA	NA	NA	NA	NA	NA	NA	NA	NA	NA	NA	NA	0.36925
Heart	Negr1	0.517364	NA	NA	NA	NA	NA	NA	NA	1	NA	NA	NA	NA	NA	NA	NA	0.0632824	NA	NA	NA	NA	NA	NA	NA	NA	NA	NA	NA	NA	NA	NA	0.368915
Heart	Chchd3	-32.7179	NA	NA	NA	NA	NA	NA	NA	-1	NA	NA	NA	NA	NA	NA	NA	4.74592e-06	NA	NA	NA	NA	NA	NA	NA	NA	NA	NA	NA	NA	NA	NA	0.368837
Heart	Cpox	-7.50242	NA	NA	NA	NA	NA	NA	NA	-1	NA	NA	NA	NA	NA	NA	NA	3.85234e-05	NA	NA	NA	NA	NA	NA	NA	NA	NA	NA	NA	NA	NA	NA	0.368722
Heart	Dnajc28	-5.07159	NA	NA	NA	NA	NA	NA	NA	-1	NA	NA	NA	NA	NA	NA	NA	1.17846e-05	NA	NA	NA	NA	NA	NA	NA	NA	NA	NA	NA	NA	NA	NA	0.368574
Heart	Epb41l4a	-737.77	0.46739	NA	NA	NA	NA	NA	NA	-1	0	NA	NA	NA	NA	NA	NA	0.0953494	0.258095	NA	NA	NA	NA	NA	NA	3.05783	NA	NA	NA	NA	NA	NA	0.368536
Heart	Sucla2	-59.6107	NA	NA	NA	NA	NA	NA	NA	-1	NA	NA	NA	NA	NA	NA	NA	1.12596e-05	NA	NA	NA	NA	NA	NA	NA	NA	NA	NA	NA	NA	NA	NA	0.368518
Heart	Mrpl39	-6.98547	NA	NA	NA	NA	NA	NA	NA	-1	NA	NA	NA	NA	NA	NA	NA	5.23401e-06	NA	NA	NA	NA	NA	NA	NA	NA	NA	NA	NA	NA	NA	NA	0.368109
Heart	Maoa	1.56384	NA	NA	NA	NA	NA	NA	NA	1	NA	NA	NA	NA	NA	NA	NA	4.88973e-05	NA	NA	NA	NA	NA	NA	NA	NA	NA	NA	NA	NA	NA	NA	0.367742
Heart	Smarcd3	-4.61178	NA	NA	NA	NA	NA	NA	NA	-1	NA	NA	NA	NA	NA	NA	NA	4.73546e-05	NA	NA	NA	NA	NA	NA	NA	NA	NA	NA	NA	NA	NA	NA	0.367454
Heart	Coq5	-16.112	NA	NA	NA	NA	NA	NA	NA	-1	NA	NA	NA	NA	NA	NA	NA	4.92094e-05	NA	NA	NA	NA	NA	NA	NA	NA	NA	NA	NA	NA	NA	NA	0.367141
Heart	Fastk	-31.7624	NA	NA	NA	NA	NA	NA	NA	-1	NA	NA	NA	NA	NA	NA	NA	2.31092e-05	NA	NA	NA	NA	NA	NA	NA	NA	NA	NA	NA	NA	NA	NA	0.367073
Heart	Calr	-30.8794	NA	NA	NA	NA	NA	NA	NA	-1	NA	NA	NA	NA	NA	NA	NA	1.98758e-05	NA	NA	NA	NA	NA	NA	NA	NA	NA	NA	NA	NA	NA	NA	0.367004
Heart	Gm7896	0.414258	NA	NA	NA	NA	NA	NA	NA	1	NA	NA	NA	NA	NA	NA	NA	1.62321e-05	NA	NA	NA	NA	NA	NA	NA	NA	NA	NA	NA	NA	NA	NA	0.366579
Heart	Ssxb10	-0.34374	0.83973	NA	NA	NA	NA	NA	NA	0	1	NA	NA	NA	NA	NA	NA	0.208372	0.0735084	NA	NA	NA	NA	NA	NA	14.7063	NA	NA	NA	NA	NA	NA	0.366412
Heart	Crispld2	-4.16714	NA	NA	NA	NA	NA	NA	NA	-1	NA	NA	NA	NA	NA	NA	NA	0.0527077	NA	NA	NA	NA	NA	NA	NA	NA	NA	NA	NA	NA	NA	NA	0.366179
Heart	Sprr1a	0.540251	NA	NA	NA	NA	NA	NA	NA	1	NA	NA	NA	NA	NA	NA	NA	1.05053e-05	NA	NA	NA	NA	NA	NA	NA	NA	NA	NA	NA	NA	NA	NA	0.366035
Heart	Gm44668	0.962685	NA	NA	NA	NA	NA	NA	NA	1	NA	NA	NA	NA	NA	NA	NA	5.33357e-06	NA	NA	NA	NA	NA	NA	NA	NA	NA	NA	NA	NA	NA	NA	0.365639
Heart	Cpne7	1.9856	-0.66769	NA	NA	NA	NA	NA	NA	1	0	NA	NA	NA	NA	NA	NA	0.0804801	0.217882	NA	NA	NA	NA	NA	NA	14.9914	NA	NA	NA	NA	NA	NA	0.365586
Heart	Sele	1.28773	NA	NA	NA	NA	NA	NA	NA	1	NA	NA	NA	NA	NA	NA	NA	5.65752e-06	NA	NA	NA	NA	NA	NA	NA	NA	NA	NA	NA	NA	NA	NA	0.365467
Heart	Il2rb	0.947913	NA	NA	NA	NA	NA	NA	NA	1	NA	NA	NA	NA	NA	NA	NA	6.26388e-06	NA	NA	NA	NA	NA	NA	NA	NA	NA	NA	NA	NA	NA	NA	0.364826
Heart	Cx3cr1	-15.236	3.1077	NA	NA	NA	NA	NA	NA	0	1	NA	NA	NA	NA	NA	NA	0.103102	0.0707461	NA	NA	NA	NA	NA	NA	6.32691	NA	NA	NA	NA	NA	NA	0.364787
Heart	Milr1	-0.60859	1.0933	NA	NA	NA	NA	NA	NA	-1	1	NA	NA	NA	NA	NA	NA	0.0971301	0.0895788	NA	NA	NA	NA	NA	NA	16.7086	NA	NA	NA	NA	NA	NA	0.364671
Heart	Cpt2	-35.8489	NA	NA	NA	NA	NA	NA	NA	-1	NA	NA	NA	NA	NA	NA	NA	5.6307e-06	NA	NA	NA	NA	NA	NA	NA	NA	NA	NA	NA	NA	NA	NA	0.364464
Heart	Spsb1	-7.65962	NA	NA	NA	NA	NA	NA	NA	-1	NA	NA	NA	NA	NA	NA	NA	1.87422e-05	NA	NA	NA	NA	NA	NA	NA	NA	NA	NA	NA	NA	NA	NA	0.364374
Heart	Gm20824	0.235843	NA	NA	NA	NA	NA	NA	NA	1	NA	NA	NA	NA	NA	NA	NA	0.000814468	NA	NA	NA	NA	NA	NA	NA	NA	NA	NA	NA	NA	NA	NA	0.364262
Heart	Pde3b	2.9909	NA	NA	NA	NA	NA	NA	NA	1	NA	NA	NA	NA	NA	NA	NA	1.25604e-05	NA	NA	NA	NA	NA	NA	NA	NA	NA	NA	NA	NA	NA	NA	0.364148
Heart	Zfp706	23.11	-26.877	NA	NA	NA	NA	NA	NA	0	-1	NA	NA	NA	NA	NA	NA	0.20157	0.073699	NA	NA	NA	NA	NA	NA	9.84646	NA	NA	NA	NA	NA	NA	0.363406
Heart	Slc7a8	-0.56698	6.4473	-9.179	NA	NA	NA	NA	NA	0	1	0	NA	NA	NA	NA	NA	0.348889	0.0774805	0.127349	NA	NA	NA	NA	NA	14.8709	22.0116	NA	NA	NA	NA	NA	0.363347
Heart	Mme	3.7571	-8.5807	NA	NA	NA	NA	NA	NA	1	0	NA	NA	NA	NA	NA	NA	0.0668437	0.135832	NA	NA	NA	NA	NA	NA	21.0029	NA	NA	NA	NA	NA	NA	0.363216
Heart	Rtn4ip1	1.4103	-38.739	NA	NA	NA	NA	NA	NA	0	-1	NA	NA	NA	NA	NA	NA	0.429381	0.0829883	NA	NA	NA	NA	NA	NA	17.9867	NA	NA	NA	NA	NA	NA	0.362879
Heart	Gys1	-16.6532	NA	NA	NA	NA	NA	NA	NA	-1	NA	NA	NA	NA	NA	NA	NA	0.000283271	NA	NA	NA	NA	NA	NA	NA	NA	NA	NA	NA	NA	NA	NA	0.36248
Heart	Eif2b4	-4.90879	NA	NA	NA	NA	NA	NA	NA	-1	NA	NA	NA	NA	NA	NA	NA	2.68633e-05	NA	NA	NA	NA	NA	NA	NA	NA	NA	NA	NA	NA	NA	NA	0.361975
Heart	Gm5381	0.0757001	NA	NA	NA	NA	NA	NA	NA	1	NA	NA	NA	NA	NA	NA	NA	0.0774116	NA	NA	NA	NA	NA	NA	NA	NA	NA	NA	NA	NA	NA	NA	0.361704
Heart	Ptges2	-7.76721	NA	NA	NA	NA	NA	NA	NA	-1	NA	NA	NA	NA	NA	NA	NA	3.79315e-05	NA	NA	NA	NA	NA	NA	NA	NA	NA	NA	NA	NA	NA	NA	0.361608
Heart	Plin3	-26.2491	NA	NA	NA	NA	NA	NA	NA	-1	NA	NA	NA	NA	NA	NA	NA	6.30796e-05	NA	NA	NA	NA	NA	NA	NA	NA	NA	NA	NA	NA	NA	NA	0.361475
Heart	Rcan2	44.259	-190.39	NA	NA	NA	NA	NA	NA	0	-1	NA	NA	NA	NA	NA	NA	0.20176	0.0871573	NA	NA	NA	NA	NA	NA	16.265	NA	NA	NA	NA	NA	NA	0.360577
Heart	Rom1	-2.56466	NA	NA	NA	NA	NA	NA	NA	-1	NA	NA	NA	NA	NA	NA	NA	0.000139413	NA	NA	NA	NA	NA	NA	NA	NA	NA	NA	NA	NA	NA	NA	0.360445
Heart	Fars2	-7.00286	NA	NA	NA	NA	NA	NA	NA	-1	NA	NA	NA	NA	NA	NA	NA	0.000105652	NA	NA	NA	NA	NA	NA	NA	NA	NA	NA	NA	NA	NA	NA	0.360029
Heart	Actr3b	8.3021	-15.397	NA	NA	NA	NA	NA	NA	0	-1	NA	NA	NA	NA	NA	NA	0.178319	0.0789092	NA	NA	NA	NA	NA	NA	14.217	NA	NA	NA	NA	NA	NA	0.359859
Heart	Ppef1	0.389694	NA	NA	NA	NA	NA	NA	NA	1	NA	NA	NA	NA	NA	NA	NA	0.0586546	NA	NA	NA	NA	NA	NA	NA	NA	NA	NA	NA	NA	NA	NA	0.359269
Heart	Pdk2	-85.6659	NA	NA	NA	NA	NA	NA	NA	-1	NA	NA	NA	NA	NA	NA	NA	2.72936e-05	NA	NA	NA	NA	NA	NA	NA	NA	NA	NA	NA	NA	NA	NA	0.358754
Heart	Ms4a2	-0.89463	2.1922	NA	NA	NA	NA	NA	NA	0	1	NA	NA	NA	NA	NA	NA	0.192446	0.066197	NA	NA	NA	NA	NA	NA	14.8929	NA	NA	NA	NA	NA	NA	0.358458
Heart	Sh3bp5	-7.87367	NA	NA	NA	NA	NA	NA	NA	-1	NA	NA	NA	NA	NA	NA	NA	6.73802e-06	NA	NA	NA	NA	NA	NA	NA	NA	NA	NA	NA	NA	NA	NA	0.358233
Heart	Vwc2	1.62436	NA	NA	NA	NA	NA	NA	NA	1	NA	NA	NA	NA	NA	NA	NA	2.335e-05	NA	NA	NA	NA	NA	NA	NA	NA	NA	NA	NA	NA	NA	NA	0.357917
Heart	Gm12184	-0.70649	95.317	-1.0196	NA	NA	NA	NA	NA	0	0	-1	NA	NA	NA	NA	NA	0.119884	0.286128	0.0878752	NA	NA	NA	NA	NA	14.9017	15.0284	NA	NA	NA	NA	NA	0.357856
Heart	Mettl11b	1.00682	NA	NA	NA	NA	NA	NA	NA	1	NA	NA	NA	NA	NA	NA	NA	0.000137706	NA	NA	NA	NA	NA	NA	NA	NA	NA	NA	NA	NA	NA	NA	0.357813
Heart	Got1	-89.5158	NA	NA	NA	NA	NA	NA	NA	-1	NA	NA	NA	NA	NA	NA	NA	6.98883e-06	NA	NA	NA	NA	NA	NA	NA	NA	NA	NA	NA	NA	NA	NA	0.357589
Heart	Oasl1	1.20946	NA	NA	NA	NA	NA	NA	NA	1	NA	NA	NA	NA	NA	NA	NA	2.74167e-05	NA	NA	NA	NA	NA	NA	NA	NA	NA	NA	NA	NA	NA	NA	0.357419
Heart	Gm45163	1.1583	-41.683	NA	NA	NA	NA	NA	NA	1	0	NA	NA	NA	NA	NA	NA	0.061796	0.437109	NA	NA	NA	NA	NA	NA	26.5353	NA	NA	NA	NA	NA	NA	0.357255
Heart	Gm14538	0.182996	NA	NA	NA	NA	NA	NA	NA	1	NA	NA	NA	NA	NA	NA	NA	0.0488304	NA	NA	NA	NA	NA	NA	NA	NA	NA	NA	NA	NA	NA	NA	0.357173
Heart	Gfm1	7.3732	-57.592	NA	NA	NA	NA	NA	NA	0	-1	NA	NA	NA	NA	NA	NA	0.281073	0.0797457	NA	NA	NA	NA	NA	NA	17.6132	NA	NA	NA	NA	NA	NA	0.357155
Heart	Bnc2	1.64083	NA	NA	NA	NA	NA	NA	NA	1	NA	NA	NA	NA	NA	NA	NA	1.06453e-05	NA	NA	NA	NA	NA	NA	NA	NA	NA	NA	NA	NA	NA	NA	0.357049
Heart	Bfar	-6.36114	NA	NA	NA	NA	NA	NA	NA	-1	NA	NA	NA	NA	NA	NA	NA	1.63631e-05	NA	NA	NA	NA	NA	NA	NA	NA	NA	NA	NA	NA	NA	NA	0.356882
Heart	Ublcp1	-3.87456	NA	NA	NA	NA	NA	NA	NA	-1	NA	NA	NA	NA	NA	NA	NA	2.04865e-05	NA	NA	NA	NA	NA	NA	NA	NA	NA	NA	NA	NA	NA	NA	0.356778
Heart	Igsf1	5.00776	NA	NA	NA	NA	NA	NA	NA	1	NA	NA	NA	NA	NA	NA	NA	0.00415048	NA	NA	NA	NA	NA	NA	NA	NA	NA	NA	NA	NA	NA	NA	0.356315
Heart	Vmn1r19	-0.023594	20.933	-4.2176	NA	NA	NA	NA	NA	0	0	-1	NA	NA	NA	NA	NA	0.464802	0.417772	0.0989942	NA	NA	NA	NA	NA	20.677	21.879	NA	NA	NA	NA	NA	0.355802
Heart	Dgat2	-44.9969	NA	NA	NA	NA	NA	NA	NA	-1	NA	NA	NA	NA	NA	NA	NA	7.09996e-05	NA	NA	NA	NA	NA	NA	NA	NA	NA	NA	NA	NA	NA	NA	0.355285
Heart	Ube2h	-10.3443	NA	NA	NA	NA	NA	NA	NA	-1	NA	NA	NA	NA	NA	NA	NA	8.95942e-06	NA	NA	NA	NA	NA	NA	NA	NA	NA	NA	NA	NA	NA	NA	0.355058
Heart	Slc40a1	106.28	-17.817	NA	NA	NA	NA	NA	NA	1	-1	NA	NA	NA	NA	NA	NA	0.0971875	0.0804124	NA	NA	NA	NA	NA	NA	6.47101	NA	NA	NA	NA	NA	NA	0.355012
Heart	Myrf	413.15	-1.1118	NA	NA	NA	NA	NA	NA	0	-1	NA	NA	NA	NA	NA	NA	0.131793	0.0977603	NA	NA	NA	NA	NA	NA	3.09775	NA	NA	NA	NA	NA	NA	0.354778
Heart	Pir	1.15624	NA	NA	NA	NA	NA	NA	NA	1	NA	NA	NA	NA	NA	NA	NA	0.00215904	NA	NA	NA	NA	NA	NA	NA	NA	NA	NA	NA	NA	NA	NA	0.354578
Heart	Olfr1459	-0.95537	2.6342	NA	NA	NA	NA	NA	NA	0	1	NA	NA	NA	NA	NA	NA	0.148531	0.0932738	NA	NA	NA	NA	NA	NA	16.0833	NA	NA	NA	NA	NA	NA	0.354346
Heart	Gm42818	0.255839	NA	NA	NA	NA	NA	NA	NA	1	NA	NA	NA	NA	NA	NA	NA	1.89688e-05	NA	NA	NA	NA	NA	NA	NA	NA	NA	NA	NA	NA	NA	NA	0.353902
Heart	Dnajb11	-5.41159	NA	NA	NA	NA	NA	NA	NA	-1	NA	NA	NA	NA	NA	NA	NA	8.42915e-06	NA	NA	NA	NA	NA	NA	NA	NA	NA	NA	NA	NA	NA	NA	0.353826
Heart	Syp	0.418974	NA	NA	NA	NA	NA	NA	NA	1	NA	NA	NA	NA	NA	NA	NA	0.0379332	NA	NA	NA	NA	NA	NA	NA	NA	NA	NA	NA	NA	NA	NA	0.353807
Heart	Dyrk2	-4.02903	NA	NA	NA	NA	NA	NA	NA	-1	NA	NA	NA	NA	NA	NA	NA	2.03593e-05	NA	NA	NA	NA	NA	NA	NA	NA	NA	NA	NA	NA	NA	NA	0.353717
Heart	Cacfd1	0.62496	-23.807	NA	NA	NA	NA	NA	NA	0	-1	NA	NA	NA	NA	NA	NA	0.455041	0.093226	NA	NA	NA	NA	NA	NA	17.0386	NA	NA	NA	NA	NA	NA	0.353707
Heart	Cerkl	1.07306	NA	NA	NA	NA	NA	NA	NA	1	NA	NA	NA	NA	NA	NA	NA	1.04055e-05	NA	NA	NA	NA	NA	NA	NA	NA	NA	NA	NA	NA	NA	NA	0.353653
Heart	4930412M03Rik	97.751	-0.42389	3.4523	NA	NA	NA	NA	NA	0	0	1	NA	NA	NA	NA	NA	0.158753	0.108118	0.0912664	NA	NA	NA	NA	NA	3.05822	23.4771	NA	NA	NA	NA	NA	0.353268
Heart	Stard7	-21.4322	NA	NA	NA	NA	NA	NA	NA	-1	NA	NA	NA	NA	NA	NA	NA	1.8079e-05	NA	NA	NA	NA	NA	NA	NA	NA	NA	NA	NA	NA	NA	NA	0.353202
Heart	Dele1	-18.719	NA	NA	NA	NA	NA	NA	NA	-1	NA	NA	NA	NA	NA	NA	NA	2.73252e-05	NA	NA	NA	NA	NA	NA	NA	NA	NA	NA	NA	NA	NA	NA	0.353059
Heart	Upk3b	-5.51218	NA	NA	NA	NA	NA	NA	NA	-1	NA	NA	NA	NA	NA	NA	NA	1.26678e-05	NA	NA	NA	NA	NA	NA	NA	NA	NA	NA	NA	NA	NA	NA	0.352328
Heart	Napsa	-0.66529	1.2881	NA	NA	NA	NA	NA	NA	0	1	NA	NA	NA	NA	NA	NA	0.179849	0.0764945	NA	NA	NA	NA	NA	NA	13.6058	NA	NA	NA	NA	NA	NA	0.351589
Heart	Psmd11	-8.11035	NA	NA	NA	NA	NA	NA	NA	-1	NA	NA	NA	NA	NA	NA	NA	4.96319e-05	NA	NA	NA	NA	NA	NA	NA	NA	NA	NA	NA	NA	NA	NA	0.35153
Heart	Arfrp1	1.4073	-13.233	NA	NA	NA	NA	NA	NA	0	-1	NA	NA	NA	NA	NA	NA	0.366858	0.0921167	NA	NA	NA	NA	NA	NA	15.0188	NA	NA	NA	NA	NA	NA	0.351183
Heart	Aifm2	-1.85795	NA	NA	NA	NA	NA	NA	NA	-1	NA	NA	NA	NA	NA	NA	NA	0.0325643	NA	NA	NA	NA	NA	NA	NA	NA	NA	NA	NA	NA	NA	NA	0.351098
Heart	Kcnj14	1.18015	NA	NA	NA	NA	NA	NA	NA	1	NA	NA	NA	NA	NA	NA	NA	0.000110287	NA	NA	NA	NA	NA	NA	NA	NA	NA	NA	NA	NA	NA	NA	0.350785
Heart	Farsb	150.57	-6.1197	NA	NA	NA	NA	NA	NA	0	-1	NA	NA	NA	NA	NA	NA	0.424479	0.0625441	NA	NA	NA	NA	NA	NA	3.58665	NA	NA	NA	NA	NA	NA	0.350782
Heart	Plod1	-17.0212	NA	NA	NA	NA	NA	NA	NA	-1	NA	NA	NA	NA	NA	NA	NA	1.10509e-05	NA	NA	NA	NA	NA	NA	NA	NA	NA	NA	NA	NA	NA	NA	0.35004
Heart	Olfr148	-0.055974	1.0098	NA	NA	NA	NA	NA	NA	0	1	NA	NA	NA	NA	NA	NA	0.394327	0.0826197	NA	NA	NA	NA	NA	NA	17.8608	NA	NA	NA	NA	NA	NA	0.349455
Heart	3110067C02Rik	-0.26617	0.68329	NA	NA	NA	NA	NA	NA	0	1	NA	NA	NA	NA	NA	NA	0.228957	0.0795759	NA	NA	NA	NA	NA	NA	14.4138	NA	NA	NA	NA	NA	NA	0.349385
Heart	Dlgap1	2.90459	NA	NA	NA	NA	NA	NA	NA	1	NA	NA	NA	NA	NA	NA	NA	8.96613e-06	NA	NA	NA	NA	NA	NA	NA	NA	NA	NA	NA	NA	NA	NA	0.349264
Heart	Olfr535	-0.30122	1.927	NA	NA	NA	NA	NA	NA	0	1	NA	NA	NA	NA	NA	NA	0.259639	0.0852129	NA	NA	NA	NA	NA	NA	17.0397	NA	NA	NA	NA	NA	NA	0.349118
Heart	Rgs14	-0.39967	2.0301	NA	NA	NA	NA	NA	NA	0	1	NA	NA	NA	NA	NA	NA	0.176458	0.0927508	NA	NA	NA	NA	NA	NA	18.0478	NA	NA	NA	NA	NA	NA	0.348552
Heart	Zfp180	-3.27603	NA	NA	NA	NA	NA	NA	NA	-1	NA	NA	NA	NA	NA	NA	NA	0.00014477	NA	NA	NA	NA	NA	NA	NA	NA	NA	NA	NA	NA	NA	NA	0.348523
Heart	Ubl7	-7.22382	NA	NA	NA	NA	NA	NA	NA	-1	NA	NA	NA	NA	NA	NA	NA	0.00011381	NA	NA	NA	NA	NA	NA	NA	NA	NA	NA	NA	NA	NA	NA	0.347938
Heart	Tenm3	1.2035	NA	NA	NA	NA	NA	NA	NA	1	NA	NA	NA	NA	NA	NA	NA	0.0111448	NA	NA	NA	NA	NA	NA	NA	NA	NA	NA	NA	NA	NA	NA	0.347837
Heart	Nkiras2	-7.30673	NA	NA	NA	NA	NA	NA	NA	-1	NA	NA	NA	NA	NA	NA	NA	5.93035e-05	NA	NA	NA	NA	NA	NA	NA	NA	NA	NA	NA	NA	NA	NA	0.347324
Heart	Pdhb	-72.4134	NA	NA	NA	NA	NA	NA	NA	-1	NA	NA	NA	NA	NA	NA	NA	2.35722e-05	NA	NA	NA	NA	NA	NA	NA	NA	NA	NA	NA	NA	NA	NA	0.347229
Heart	C330018D20Rik	6.2264	-5.3755	NA	NA	NA	NA	NA	NA	0	-1	NA	NA	NA	NA	NA	NA	0.149107	0.0683465	NA	NA	NA	NA	NA	NA	10.9602	NA	NA	NA	NA	NA	NA	0.347126
Heart	Usp26	0.284446	NA	NA	NA	NA	NA	NA	NA	1	NA	NA	NA	NA	NA	NA	NA	0.0528706	NA	NA	NA	NA	NA	NA	NA	NA	NA	NA	NA	NA	NA	NA	0.346733
Heart	Ggcx	-4.7312	NA	NA	NA	NA	NA	NA	NA	-1	NA	NA	NA	NA	NA	NA	NA	2.17514e-05	NA	NA	NA	NA	NA	NA	NA	NA	NA	NA	NA	NA	NA	NA	0.346523
Heart	Fndc5	-44.9785	NA	NA	NA	NA	NA	NA	NA	-1	NA	NA	NA	NA	NA	NA	NA	1.06281e-05	NA	NA	NA	NA	NA	NA	NA	NA	NA	NA	NA	NA	NA	NA	0.346461
Heart	Gm14867	0.359888	NA	NA	NA	NA	NA	NA	NA	1	NA	NA	NA	NA	NA	NA	NA	0.00486841	NA	NA	NA	NA	NA	NA	NA	NA	NA	NA	NA	NA	NA	NA	0.346437
Heart	Ikzf1	-3.7015	2.7069	NA	NA	NA	NA	NA	NA	0	1	NA	NA	NA	NA	NA	NA	0.145287	0.0778688	NA	NA	NA	NA	NA	NA	10.1024	NA	NA	NA	NA	NA	NA	0.345646
Heart	Uqcrc1	-213.524	NA	NA	NA	NA	NA	NA	NA	-1	NA	NA	NA	NA	NA	NA	NA	4.69508e-05	NA	NA	NA	NA	NA	NA	NA	NA	NA	NA	NA	NA	NA	NA	0.345602
Heart	Rai14	1.4212	NA	NA	NA	NA	NA	NA	NA	1	NA	NA	NA	NA	NA	NA	NA	0.000113959	NA	NA	NA	NA	NA	NA	NA	NA	NA	NA	NA	NA	NA	NA	0.345494
Heart	4933431K23Rik	0.557103	NA	NA	NA	NA	NA	NA	NA	1	NA	NA	NA	NA	NA	NA	NA	0.0800953	NA	NA	NA	NA	NA	NA	NA	NA	NA	NA	NA	NA	NA	NA	0.345323
Heart	Olfr867	0.598719	NA	NA	NA	NA	NA	NA	NA	1	NA	NA	NA	NA	NA	NA	NA	1.05591e-05	NA	NA	NA	NA	NA	NA	NA	NA	NA	NA	NA	NA	NA	NA	0.344607
Heart	Dbt	-6.36305	NA	NA	NA	NA	NA	NA	NA	-1	NA	NA	NA	NA	NA	NA	NA	1.32834e-05	NA	NA	NA	NA	NA	NA	NA	NA	NA	NA	NA	NA	NA	NA	0.344592
Heart	Trim63	-28.8128	NA	NA	NA	NA	NA	NA	NA	-1	NA	NA	NA	NA	NA	NA	NA	2.10225e-05	NA	NA	NA	NA	NA	NA	NA	NA	NA	NA	NA	NA	NA	NA	0.343989
Heart	Amot	2.25427	NA	NA	NA	NA	NA	NA	NA	1	NA	NA	NA	NA	NA	NA	NA	1.05144e-05	NA	NA	NA	NA	NA	NA	NA	NA	NA	NA	NA	NA	NA	NA	0.343823
Heart	Adipor1	-26.106	NA	NA	NA	NA	NA	NA	NA	-1	NA	NA	NA	NA	NA	NA	NA	1.34694e-05	NA	NA	NA	NA	NA	NA	NA	NA	NA	NA	NA	NA	NA	NA	0.343591
Heart	Acsl6	7.6229	-7.6706	NA	NA	NA	NA	NA	NA	1	0	NA	NA	NA	NA	NA	NA	0.0841546	0.215599	NA	NA	NA	NA	NA	NA	18.6858	NA	NA	NA	NA	NA	NA	0.343522
Heart	Thtpa	491.38	-848.83	227.31	-1.5243	NA	NA	NA	NA	0	-1	0	0	NA	NA	NA	NA	0.138334	0.0867403	0.235446	0.137521	NA	NA	NA	NA	4.91231	6.6277	9.06855	NA	NA	NA	NA	0.34342
Heart	Dram2	-8.61862	NA	NA	NA	NA	NA	NA	NA	-1	NA	NA	NA	NA	NA	NA	NA	1.32285e-05	NA	NA	NA	NA	NA	NA	NA	NA	NA	NA	NA	NA	NA	NA	0.343323
Heart	Fam210a	13.081	-39.839	NA	NA	NA	NA	NA	NA	0	-1	NA	NA	NA	NA	NA	NA	0.145678	0.0830793	NA	NA	NA	NA	NA	NA	17.1078	NA	NA	NA	NA	NA	NA	0.343284
Heart	Gm45473	-0.27717	0.98823	NA	NA	NA	NA	NA	NA	0	1	NA	NA	NA	NA	NA	NA	0.171514	0.0860086	NA	NA	NA	NA	NA	NA	17.5983	NA	NA	NA	NA	NA	NA	0.342993
Heart	Phyh	-45.7987	NA	NA	NA	NA	NA	NA	NA	-1	NA	NA	NA	NA	NA	NA	NA	3.26098e-05	NA	NA	NA	NA	NA	NA	NA	NA	NA	NA	NA	NA	NA	NA	0.342405
Heart	Hsd17b4	-9.73056	NA	NA	NA	NA	NA	NA	NA	-1	NA	NA	NA	NA	NA	NA	NA	4.99172e-05	NA	NA	NA	NA	NA	NA	NA	NA	NA	NA	NA	NA	NA	NA	0.342258
Heart	Cd209b	1.17697	NA	NA	NA	NA	NA	NA	NA	1	NA	NA	NA	NA	NA	NA	NA	1.13482e-05	NA	NA	NA	NA	NA	NA	NA	NA	NA	NA	NA	NA	NA	NA	0.342022
Heart	Aox3	2.34849	NA	NA	NA	NA	NA	NA	NA	1	NA	NA	NA	NA	NA	NA	NA	1.15362e-05	NA	NA	NA	NA	NA	NA	NA	NA	NA	NA	NA	NA	NA	NA	0.34196
Heart	Got2	-78.2379	NA	NA	NA	NA	NA	NA	NA	-1	NA	NA	NA	NA	NA	NA	NA	6.29787e-05	NA	NA	NA	NA	NA	NA	NA	NA	NA	NA	NA	NA	NA	NA	0.341713
Heart	Chst10	-0.69442	2.7283	NA	NA	NA	NA	NA	NA	0	1	NA	NA	NA	NA	NA	NA	0.205734	0.0977516	NA	NA	NA	NA	NA	NA	16.004	NA	NA	NA	NA	NA	NA	0.340543
Heart	Ptprc	-15.807	7.6916	NA	NA	NA	NA	NA	NA	0	1	NA	NA	NA	NA	NA	NA	0.203424	0.0657897	NA	NA	NA	NA	NA	NA	7.65825	NA	NA	NA	NA	NA	NA	0.339998
Heart	Casd1	-5.33779	NA	NA	NA	NA	NA	NA	NA	-1	NA	NA	NA	NA	NA	NA	NA	2.54837e-05	NA	NA	NA	NA	NA	NA	NA	NA	NA	NA	NA	NA	NA	NA	0.339865
Heart	Gm43000	0.690651	NA	NA	NA	NA	NA	NA	NA	1	NA	NA	NA	NA	NA	NA	NA	8.27066e-05	NA	NA	NA	NA	NA	NA	NA	NA	NA	NA	NA	NA	NA	NA	0.339723
Heart	Rab22a	-6.26487	NA	NA	NA	NA	NA	NA	NA	-1	NA	NA	NA	NA	NA	NA	NA	1.47207e-05	NA	NA	NA	NA	NA	NA	NA	NA	NA	NA	NA	NA	NA	NA	0.339465
Heart	Sqor	18.961	-8.6946	NA	NA	NA	NA	NA	NA	1	-1	NA	NA	NA	NA	NA	NA	0.0985756	0.0808623	NA	NA	NA	NA	NA	NA	9.67961	NA	NA	NA	NA	NA	NA	0.339397
Heart	Laptm4b	-8.54553	NA	NA	NA	NA	NA	NA	NA	-1	NA	NA	NA	NA	NA	NA	NA	1.42152e-05	NA	NA	NA	NA	NA	NA	NA	NA	NA	NA	NA	NA	NA	NA	0.339269
Heart	Hspa9	29.149	-166.63	NA	NA	NA	NA	NA	NA	0	-1	NA	NA	NA	NA	NA	NA	0.255226	0.0923532	NA	NA	NA	NA	NA	NA	16.5372	NA	NA	NA	NA	NA	NA	0.339236
Heart	Gm36070	-0.15509	1.0784	NA	NA	NA	NA	NA	NA	0	1	NA	NA	NA	NA	NA	NA	0.32987	0.0910454	NA	NA	NA	NA	NA	NA	15.0414	NA	NA	NA	NA	NA	NA	0.339221
Heart	Gm10687	-35.617	0.50185	NA	NA	NA	NA	NA	NA	0	1	NA	NA	NA	NA	NA	NA	0.316234	0.066852	NA	NA	NA	NA	NA	NA	3.25765	NA	NA	NA	NA	NA	NA	0.339118
Heart	Prdx3	-25.3567	NA	NA	NA	NA	NA	NA	NA	-1	NA	NA	NA	NA	NA	NA	NA	2.04686e-05	NA	NA	NA	NA	NA	NA	NA	NA	NA	NA	NA	NA	NA	NA	0.339096
Heart	Hrh2	1.27638	NA	NA	NA	NA	NA	NA	NA	1	NA	NA	NA	NA	NA	NA	NA	1.87159e-05	NA	NA	NA	NA	NA	NA	NA	NA	NA	NA	NA	NA	NA	NA	0.339049
Heart	Gm48665	-0.55969	0.40033	NA	NA	NA	NA	NA	NA	0	1	NA	NA	NA	NA	NA	NA	0.14488	0.0793582	NA	NA	NA	NA	NA	NA	9.92701	NA	NA	NA	NA	NA	NA	0.338967
Heart	Olfr1224-ps1	-0.29106	1.114	NA	NA	NA	NA	NA	NA	0	1	NA	NA	NA	NA	NA	NA	0.2939	0.0805399	NA	NA	NA	NA	NA	NA	13.7449	NA	NA	NA	NA	NA	NA	0.337663
Heart	2210408F21Rik	-2.245	NA	NA	NA	NA	NA	NA	NA	-1	NA	NA	NA	NA	NA	NA	NA	1.38123e-05	NA	NA	NA	NA	NA	NA	NA	NA	NA	NA	NA	NA	NA	NA	0.337036
Heart	Las1l	-4.7903	NA	NA	NA	NA	NA	NA	NA	-1	NA	NA	NA	NA	NA	NA	NA	5.39469e-05	NA	NA	NA	NA	NA	NA	NA	NA	NA	NA	NA	NA	NA	NA	0.336826
Heart	Il17re	1.39289	NA	NA	NA	NA	NA	NA	NA	1	NA	NA	NA	NA	NA	NA	NA	1.34668e-05	NA	NA	NA	NA	NA	NA	NA	NA	NA	NA	NA	NA	NA	NA	0.336759
Heart	Ndufs1	22.327	-188.33	NA	NA	NA	NA	NA	NA	0	-1	NA	NA	NA	NA	NA	NA	0.319315	0.0948256	NA	NA	NA	NA	NA	NA	16.4727	NA	NA	NA	NA	NA	NA	0.33656
Heart	Tenm1	1.33437	NA	NA	NA	NA	NA	NA	NA	1	NA	NA	NA	NA	NA	NA	NA	0.028052	NA	NA	NA	NA	NA	NA	NA	NA	NA	NA	NA	NA	NA	NA	0.336554
Heart	Kcnj12	-5.52239	NA	NA	NA	NA	NA	NA	NA	-1	NA	NA	NA	NA	NA	NA	NA	1.93866e-05	NA	NA	NA	NA	NA	NA	NA	NA	NA	NA	NA	NA	NA	NA	0.336414
Heart	Scamp3	-5.21121	NA	NA	NA	NA	NA	NA	NA	-1	NA	NA	NA	NA	NA	NA	NA	1.35145e-05	NA	NA	NA	NA	NA	NA	NA	NA	NA	NA	NA	NA	NA	NA	0.336312
Heart	Pdia6	-16.8817	NA	NA	NA	NA	NA	NA	NA	-1	NA	NA	NA	NA	NA	NA	NA	9.79025e-05	NA	NA	NA	NA	NA	NA	NA	NA	NA	NA	NA	NA	NA	NA	0.335796
Heart	Cd163	50.013	-955.79	3.3192	NA	NA	NA	NA	NA	1	0	0	NA	NA	NA	NA	NA	0.0827857	0.200826	0.197067	NA	NA	NA	NA	NA	8.79179	9.09831	NA	NA	NA	NA	NA	0.335749
Heart	Gm15902	0.606923	NA	NA	NA	NA	NA	NA	NA	1	NA	NA	NA	NA	NA	NA	NA	1.79168e-05	NA	NA	NA	NA	NA	NA	NA	NA	NA	NA	NA	NA	NA	NA	0.33574
Heart	Gm14565	0.218493	NA	NA	NA	NA	NA	NA	NA	1	NA	NA	NA	NA	NA	NA	NA	0.00684351	NA	NA	NA	NA	NA	NA	NA	NA	NA	NA	NA	NA	NA	NA	0.335673
Heart	Dap3	-6.97042	NA	NA	NA	NA	NA	NA	NA	-1	NA	NA	NA	NA	NA	NA	NA	6.0435e-05	NA	NA	NA	NA	NA	NA	NA	NA	NA	NA	NA	NA	NA	NA	0.3356
Heart	P4hb	-18.5259	NA	NA	NA	NA	NA	NA	NA	-1	NA	NA	NA	NA	NA	NA	NA	1.4169e-05	NA	NA	NA	NA	NA	NA	NA	NA	NA	NA	NA	NA	NA	NA	0.335124
Heart	Gm48194	0.15634	492.64	-299.53	1.0722	NA	NA	NA	NA	0	1	0	0	NA	NA	NA	NA	0.360813	0.0904612	0.254477	0.163334	NA	NA	NA	NA	14.9541	16.1178	18.0477	NA	NA	NA	NA	0.335009
Heart	Arr3	0.199645	NA	NA	NA	NA	NA	NA	NA	1	NA	NA	NA	NA	NA	NA	NA	0.0830583	NA	NA	NA	NA	NA	NA	NA	NA	NA	NA	NA	NA	NA	NA	0.334993
Heart	Yme1l1	9.1778	-9.3182	NA	NA	NA	NA	NA	NA	0	-1	NA	NA	NA	NA	NA	NA	0.111088	0.0834177	NA	NA	NA	NA	NA	NA	12.4606	NA	NA	NA	NA	NA	NA	0.334552
Heart	Uba5	-3.14867	NA	NA	NA	NA	NA	NA	NA	-1	NA	NA	NA	NA	NA	NA	NA	2.51251e-05	NA	NA	NA	NA	NA	NA	NA	NA	NA	NA	NA	NA	NA	NA	0.334499
Heart	Tent5d	0.348339	NA	NA	NA	NA	NA	NA	NA	1	NA	NA	NA	NA	NA	NA	NA	0.00713477	NA	NA	NA	NA	NA	NA	NA	NA	NA	NA	NA	NA	NA	NA	0.334384
Heart	4930568G15Rik	-0.055969	2.6414	NA	NA	NA	NA	NA	NA	0	1	NA	NA	NA	NA	NA	NA	0.436338	0.0964084	NA	NA	NA	NA	NA	NA	19.5796	NA	NA	NA	NA	NA	NA	0.334322
Heart	Osgep	-5.3434	NA	NA	NA	NA	NA	NA	NA	-1	NA	NA	NA	NA	NA	NA	NA	1.51409e-05	NA	NA	NA	NA	NA	NA	NA	NA	NA	NA	NA	NA	NA	NA	0.333659
Heart	Ptdss2	-3.91271	NA	NA	NA	NA	NA	NA	NA	-1	NA	NA	NA	NA	NA	NA	NA	6.10457e-05	NA	NA	NA	NA	NA	NA	NA	NA	NA	NA	NA	NA	NA	NA	0.333587
Heart	H2-Aa	23.3083	NA	NA	NA	NA	NA	NA	NA	1	NA	NA	NA	NA	NA	NA	NA	1.67351e-05	NA	NA	NA	NA	NA	NA	NA	NA	NA	NA	NA	NA	NA	NA	0.333382
Heart	Pex10	5.4605	-4.1928	NA	NA	NA	NA	NA	NA	0	-1	NA	NA	NA	NA	NA	NA	0.156851	0.0810254	NA	NA	NA	NA	NA	NA	9.24261	NA	NA	NA	NA	NA	NA	0.333234
Heart	Cops8	-9.81914	NA	NA	NA	NA	NA	NA	NA	-1	NA	NA	NA	NA	NA	NA	NA	2.57432e-05	NA	NA	NA	NA	NA	NA	NA	NA	NA	NA	NA	NA	NA	NA	0.333124
Heart	1700027F09Rik	-404.8	0.13318	NA	NA	NA	NA	NA	NA	-1	0	NA	NA	NA	NA	NA	NA	0.0998447	0.161317	NA	NA	NA	NA	NA	NA	2.9986	NA	NA	NA	NA	NA	NA	0.333052
Heart	Olfr1318	0.69272	NA	NA	NA	NA	NA	NA	NA	1	NA	NA	NA	NA	NA	NA	NA	0.000140225	NA	NA	NA	NA	NA	NA	NA	NA	NA	NA	NA	NA	NA	NA	0.332999
Heart	Rangap1	-8.3794	0.36368	NA	NA	NA	NA	NA	NA	-1	0	NA	NA	NA	NA	NA	NA	0.0906593	0.437755	NA	NA	NA	NA	NA	NA	12.8513	NA	NA	NA	NA	NA	NA	0.332885
Heart	BC107364	0.411159	NA	NA	NA	NA	NA	NA	NA	1	NA	NA	NA	NA	NA	NA	NA	1.72204e-05	NA	NA	NA	NA	NA	NA	NA	NA	NA	NA	NA	NA	NA	NA	0.332715
Heart	Ccl11	0.94475	NA	NA	NA	NA	NA	NA	NA	1	NA	NA	NA	NA	NA	NA	NA	0.0328981	NA	NA	NA	NA	NA	NA	NA	NA	NA	NA	NA	NA	NA	NA	0.332613
Heart	Vldlr	-37.9733	NA	NA	NA	NA	NA	NA	NA	-1	NA	NA	NA	NA	NA	NA	NA	1.66786e-05	NA	NA	NA	NA	NA	NA	NA	NA	NA	NA	NA	NA	NA	NA	0.332247
Heart	Tns4	0.819066	NA	NA	NA	NA	NA	NA	NA	1	NA	NA	NA	NA	NA	NA	NA	1.57163e-05	NA	NA	NA	NA	NA	NA	NA	NA	NA	NA	NA	NA	NA	NA	0.33223
Heart	Mkrn2	-4.94474	NA	NA	NA	NA	NA	NA	NA	-1	NA	NA	NA	NA	NA	NA	NA	1.99588e-05	NA	NA	NA	NA	NA	NA	NA	NA	NA	NA	NA	NA	NA	NA	0.331074
Heart	Gpr143	0.171922	NA	NA	NA	NA	NA	NA	NA	1	NA	NA	NA	NA	NA	NA	NA	0.0975833	NA	NA	NA	NA	NA	NA	NA	NA	NA	NA	NA	NA	NA	NA	0.331067
Heart	Gm7592	0.51099	NA	NA	NA	NA	NA	NA	NA	1	NA	NA	NA	NA	NA	NA	NA	3.05162e-05	NA	NA	NA	NA	NA	NA	NA	NA	NA	NA	NA	NA	NA	NA	0.330817
Heart	Retsat	2308.3	-11.701	NA	NA	NA	NA	NA	NA	0	-1	NA	NA	NA	NA	NA	NA	0.175772	0.0656573	NA	NA	NA	NA	NA	NA	3.09314	NA	NA	NA	NA	NA	NA	0.33076
Heart	Rpl15-ps5	-0.02314	0.95761	NA	NA	NA	NA	NA	NA	0	1	NA	NA	NA	NA	NA	NA	0.413116	0.089909	NA	NA	NA	NA	NA	NA	20.9513	NA	NA	NA	NA	NA	NA	0.330686
Heart	Ube2b	-26.0736	NA	NA	NA	NA	NA	NA	NA	-1	NA	NA	NA	NA	NA	NA	NA	1.65513e-05	NA	NA	NA	NA	NA	NA	NA	NA	NA	NA	NA	NA	NA	NA	0.33052
Heart	Olfr1321	0.184796	NA	NA	NA	NA	NA	NA	NA	1	NA	NA	NA	NA	NA	NA	NA	0.0834857	NA	NA	NA	NA	NA	NA	NA	NA	NA	NA	NA	NA	NA	NA	0.33051
Heart	Pola1	0.899516	NA	NA	NA	NA	NA	NA	NA	1	NA	NA	NA	NA	NA	NA	NA	0.0371405	NA	NA	NA	NA	NA	NA	NA	NA	NA	NA	NA	NA	NA	NA	0.330478
Heart	Nsun4	969.19	-6.6221	NA	NA	NA	NA	NA	NA	0	-1	NA	NA	NA	NA	NA	NA	0.204848	0.0673383	NA	NA	NA	NA	NA	NA	3.09344	NA	NA	NA	NA	NA	NA	0.330375
Heart	Cct6a	-10.5921	NA	NA	NA	NA	NA	NA	NA	-1	NA	NA	NA	NA	NA	NA	NA	3.26851e-05	NA	NA	NA	NA	NA	NA	NA	NA	NA	NA	NA	NA	NA	NA	0.330261
Heart	Batf2	0.707712	NA	NA	NA	NA	NA	NA	NA	1	NA	NA	NA	NA	NA	NA	NA	4.8742e-05	NA	NA	NA	NA	NA	NA	NA	NA	NA	NA	NA	NA	NA	NA	0.330252
Heart	Gm44823	-133.03	0.44334	NA	NA	NA	NA	NA	NA	0	1	NA	NA	NA	NA	NA	NA	0.13914	0.0694267	NA	NA	NA	NA	NA	NA	3.05699	NA	NA	NA	NA	NA	NA	0.330237
Heart	Tsfm	-4.09777	NA	NA	NA	NA	NA	NA	NA	-1	NA	NA	NA	NA	NA	NA	NA	8.1081e-05	NA	NA	NA	NA	NA	NA	NA	NA	NA	NA	NA	NA	NA	NA	0.330061
Heart	Diablo	10.754	-4.6161	NA	NA	NA	NA	NA	NA	0	-1	NA	NA	NA	NA	NA	NA	0.183984	0.0652472	NA	NA	NA	NA	NA	NA	8.53333	NA	NA	NA	NA	NA	NA	0.329973
Heart	Ei24	-10.706	75.996	NA	NA	NA	NA	NA	NA	-1	0	NA	NA	NA	NA	NA	NA	0.0637545	0.49643	NA	NA	NA	NA	NA	NA	25.0726	NA	NA	NA	NA	NA	NA	0.32979
Heart	Dock8	-1.4045	5.657	NA	NA	NA	NA	NA	NA	0	1	NA	NA	NA	NA	NA	NA	0.190006	0.0865035	NA	NA	NA	NA	NA	NA	16.7382	NA	NA	NA	NA	NA	NA	0.329183
Heart	Naip2	1.20359	NA	NA	NA	NA	NA	NA	NA	1	NA	NA	NA	NA	NA	NA	NA	3.09472e-05	NA	NA	NA	NA	NA	NA	NA	NA	NA	NA	NA	NA	NA	NA	0.328873
Heart	Coq2	-15.3008	NA	NA	NA	NA	NA	NA	NA	-1	NA	NA	NA	NA	NA	NA	NA	1.82737e-05	NA	NA	NA	NA	NA	NA	NA	NA	NA	NA	NA	NA	NA	NA	0.32881
Heart	Lman2l	7.9979	-7.4032	NA	NA	NA	NA	NA	NA	0	-1	NA	NA	NA	NA	NA	NA	0.185834	0.0823293	NA	NA	NA	NA	NA	NA	9.31735	NA	NA	NA	NA	NA	NA	0.328584
Heart	Klf8	0.575432	NA	NA	NA	NA	NA	NA	NA	1	NA	NA	NA	NA	NA	NA	NA	0.0107924	NA	NA	NA	NA	NA	NA	NA	NA	NA	NA	NA	NA	NA	NA	0.328498
Heart	Adamtsl3	2.25768	NA	NA	NA	NA	NA	NA	NA	1	NA	NA	NA	NA	NA	NA	NA	0.000347293	NA	NA	NA	NA	NA	NA	NA	NA	NA	NA	NA	NA	NA	NA	0.32813
Heart	Kcnc1	0.754681	NA	NA	NA	NA	NA	NA	NA	1	NA	NA	NA	NA	NA	NA	NA	0.000291992	NA	NA	NA	NA	NA	NA	NA	NA	NA	NA	NA	NA	NA	NA	0.327918
Heart	Gm27016	-160.22	0.19551	NA	NA	NA	NA	NA	NA	0	1	NA	NA	NA	NA	NA	NA	0.11546	0.0921893	NA	NA	NA	NA	NA	NA	3.00831	NA	NA	NA	NA	NA	NA	0.327399
Heart	Ckm	-203.988	NA	NA	NA	NA	NA	NA	NA	-1	NA	NA	NA	NA	NA	NA	NA	0.000140506	NA	NA	NA	NA	NA	NA	NA	NA	NA	NA	NA	NA	NA	NA	0.327093
Heart	Gm48913	-0.2067	1.0184	NA	NA	NA	NA	NA	NA	0	1	NA	NA	NA	NA	NA	NA	0.28334	0.0967608	NA	NA	NA	NA	NA	NA	15.0552	NA	NA	NA	NA	NA	NA	0.326568
Heart	Tmed2	-11.2294	NA	NA	NA	NA	NA	NA	NA	-1	NA	NA	NA	NA	NA	NA	NA	2.03799e-05	NA	NA	NA	NA	NA	NA	NA	NA	NA	NA	NA	NA	NA	NA	0.326325
Heart	Cmbl	-3.69693	NA	NA	NA	NA	NA	NA	NA	-1	NA	NA	NA	NA	NA	NA	NA	0.000149978	NA	NA	NA	NA	NA	NA	NA	NA	NA	NA	NA	NA	NA	NA	0.325828
Heart	Pnkd	-7.3484	NA	NA	NA	NA	NA	NA	NA	-1	NA	NA	NA	NA	NA	NA	NA	3.0114e-05	NA	NA	NA	NA	NA	NA	NA	NA	NA	NA	NA	NA	NA	NA	0.325715
Heart	Klhl22	202.59	-3.4115	NA	NA	NA	NA	NA	NA	0	-1	NA	NA	NA	NA	NA	NA	0.349506	0.0710957	NA	NA	NA	NA	NA	NA	3.39031	NA	NA	NA	NA	NA	NA	0.324959
Heart	Eif4e	18.514	-19.59	NA	NA	NA	NA	NA	NA	0	-1	NA	NA	NA	NA	NA	NA	0.186678	0.0869877	NA	NA	NA	NA	NA	NA	11.9821	NA	NA	NA	NA	NA	NA	0.324643
Heart	Tars2	-4.98262	NA	NA	NA	NA	NA	NA	NA	-1	NA	NA	NA	NA	NA	NA	NA	2.53956e-05	NA	NA	NA	NA	NA	NA	NA	NA	NA	NA	NA	NA	NA	NA	0.324612
Heart	Gm16094	-0.039347	1.2611	NA	NA	NA	NA	NA	NA	0	1	NA	NA	NA	NA	NA	NA	0.440482	0.0963377	NA	NA	NA	NA	NA	NA	18.0051	NA	NA	NA	NA	NA	NA	0.324612
Heart	Oxa1l	-7.21604	NA	NA	NA	NA	NA	NA	NA	-1	NA	NA	NA	NA	NA	NA	NA	0.000271847	NA	NA	NA	NA	NA	NA	NA	NA	NA	NA	NA	NA	NA	NA	0.324221
Heart	Sprr2e	-0.12919	0.75481	NA	NA	NA	NA	NA	NA	0	1	NA	NA	NA	NA	NA	NA	0.266183	0.0965474	NA	NA	NA	NA	NA	NA	17.1821	NA	NA	NA	NA	NA	NA	0.324009
Heart	Mhrt	-5.71529	NA	NA	NA	NA	NA	NA	NA	-1	NA	NA	NA	NA	NA	NA	NA	9.62738e-05	NA	NA	NA	NA	NA	NA	NA	NA	NA	NA	NA	NA	NA	NA	0.323731
Heart	Gm44608	0.463115	NA	NA	NA	NA	NA	NA	NA	1	NA	NA	NA	NA	NA	NA	NA	0.000830788	NA	NA	NA	NA	NA	NA	NA	NA	NA	NA	NA	NA	NA	NA	0.323584
Heart	Txndc15	-3.80938	NA	NA	NA	NA	NA	NA	NA	-1	NA	NA	NA	NA	NA	NA	NA	3.16365e-05	NA	NA	NA	NA	NA	NA	NA	NA	NA	NA	NA	NA	NA	NA	0.323517
Heart	Ybx1	-59.6821	NA	NA	NA	NA	NA	NA	NA	-1	NA	NA	NA	NA	NA	NA	NA	2.16461e-05	NA	NA	NA	NA	NA	NA	NA	NA	NA	NA	NA	NA	NA	NA	0.323422
Heart	Rtl6	-15.944	1057.4	-2.8026	NA	NA	NA	NA	NA	-1	0	0	NA	NA	NA	NA	NA	0.0689838	0.238914	0.176053	NA	NA	NA	NA	NA	11.9234	12.0214	NA	NA	NA	NA	NA	0.323146
Heart	9430014N10Rik	-1.8376	197.04	-13.176	0.31111	NA	NA	NA	NA	0	1	0	0	NA	NA	NA	NA	0.120612	0.0819211	0.427363	0.160451	NA	NA	NA	NA	8.94952	9.18114	12.1481	NA	NA	NA	NA	0.322416
Heart	Nfat5	4.28548	NA	NA	NA	NA	NA	NA	NA	1	NA	NA	NA	NA	NA	NA	NA	3.22324e-05	NA	NA	NA	NA	NA	NA	NA	NA	NA	NA	NA	NA	NA	NA	0.321537
Heart	Mrpl38	-6.39216	NA	NA	NA	NA	NA	NA	NA	-1	NA	NA	NA	NA	NA	NA	NA	5.01896e-05	NA	NA	NA	NA	NA	NA	NA	NA	NA	NA	NA	NA	NA	NA	0.321392
Heart	Nudc	-6.4386	NA	NA	NA	NA	NA	NA	NA	-1	NA	NA	NA	NA	NA	NA	NA	2.39877e-05	NA	NA	NA	NA	NA	NA	NA	NA	NA	NA	NA	NA	NA	NA	0.321385
Heart	Dock3	-1.2292	5.5279	NA	NA	NA	NA	NA	NA	0	1	NA	NA	NA	NA	NA	NA	0.32252	0.0830158	NA	NA	NA	NA	NA	NA	14.5577	NA	NA	NA	NA	NA	NA	0.321345
Heart	Sh3gl2	2.4526	NA	NA	NA	NA	NA	NA	NA	1	NA	NA	NA	NA	NA	NA	NA	8.56002e-05	NA	NA	NA	NA	NA	NA	NA	NA	NA	NA	NA	NA	NA	NA	0.321138
Heart	Abcd3	9.12	-33.372	NA	NA	NA	NA	NA	NA	0	-1	NA	NA	NA	NA	NA	NA	0.222032	0.0983897	NA	NA	NA	NA	NA	NA	15.0501	NA	NA	NA	NA	NA	NA	0.321065
Heart	Fgf1	-23.5195	NA	NA	NA	NA	NA	NA	NA	-1	NA	NA	NA	NA	NA	NA	NA	2.21849e-05	NA	NA	NA	NA	NA	NA	NA	NA	NA	NA	NA	NA	NA	NA	0.320782
Heart	P2ry1	268.28	-10.019	NA	NA	NA	NA	NA	NA	0	-1	NA	NA	NA	NA	NA	NA	0.425864	0.0691846	NA	NA	NA	NA	NA	NA	3.79153	NA	NA	NA	NA	NA	NA	0.320675
Heart	Zfp869	19.797	-14.369	0.030344	NA	NA	NA	NA	NA	1	0	0	NA	NA	NA	NA	NA	0.0958901	0.490875	0.491182	NA	NA	NA	NA	NA	6.48259	11.2773	NA	NA	NA	NA	NA	0.320646
Heart	Cct8	-13.3531	NA	NA	NA	NA	NA	NA	NA	-1	NA	NA	NA	NA	NA	NA	NA	2.53526e-05	NA	NA	NA	NA	NA	NA	NA	NA	NA	NA	NA	NA	NA	NA	0.320607
Heart	Ccdc122	0.93002	NA	NA	NA	NA	NA	NA	NA	1	NA	NA	NA	NA	NA	NA	NA	2.88939e-05	NA	NA	NA	NA	NA	NA	NA	NA	NA	NA	NA	NA	NA	NA	0.320536
Heart	Psmd2	-21.8448	NA	NA	NA	NA	NA	NA	NA	-1	NA	NA	NA	NA	NA	NA	NA	5.77455e-05	NA	NA	NA	NA	NA	NA	NA	NA	NA	NA	NA	NA	NA	NA	0.319629
Heart	Gm13333	-0.3294	0.82821	NA	NA	NA	NA	NA	NA	0	1	NA	NA	NA	NA	NA	NA	0.145958	0.0998053	NA	NA	NA	NA	NA	NA	16.0955	NA	NA	NA	NA	NA	NA	0.319561
Heart	Pcdhb18	0.97839	-4.9292	NA	NA	NA	NA	NA	NA	1	0	NA	NA	NA	NA	NA	NA	0.0634061	0.491313	NA	NA	NA	NA	NA	NA	24.481	NA	NA	NA	NA	NA	NA	0.31956
Heart	9130401M01Rik	-1.17474	NA	NA	NA	NA	NA	NA	NA	-1	NA	NA	NA	NA	NA	NA	NA	2.61178e-05	NA	NA	NA	NA	NA	NA	NA	NA	NA	NA	NA	NA	NA	NA	0.319468
Heart	Clcn4	-9.7214	NA	NA	NA	NA	NA	NA	NA	-1	NA	NA	NA	NA	NA	NA	NA	3.71231e-05	NA	NA	NA	NA	NA	NA	NA	NA	NA	NA	NA	NA	NA	NA	0.319433
Heart	Fam234a	-12.5874	NA	NA	NA	NA	NA	NA	NA	-1	NA	NA	NA	NA	NA	NA	NA	0.00258629	NA	NA	NA	NA	NA	NA	NA	NA	NA	NA	NA	NA	NA	NA	0.319125
Heart	Rbm38	-28.1313	NA	NA	NA	NA	NA	NA	NA	-1	NA	NA	NA	NA	NA	NA	NA	2.66524e-05	NA	NA	NA	NA	NA	NA	NA	NA	NA	NA	NA	NA	NA	NA	0.31873
Heart	Ptger2	0.743464	NA	NA	NA	NA	NA	NA	NA	1	NA	NA	NA	NA	NA	NA	NA	4.77576e-05	NA	NA	NA	NA	NA	NA	NA	NA	NA	NA	NA	NA	NA	NA	0.318617
Heart	P2ry4	0.201302	NA	NA	NA	NA	NA	NA	NA	1	NA	NA	NA	NA	NA	NA	NA	0.0501406	NA	NA	NA	NA	NA	NA	NA	NA	NA	NA	NA	NA	NA	NA	0.318591
Heart	9830004L10Rik	-0.14313	1.1239	NA	NA	NA	NA	NA	NA	0	1	NA	NA	NA	NA	NA	NA	0.294772	0.0863524	NA	NA	NA	NA	NA	NA	17.4266	NA	NA	NA	NA	NA	NA	0.317981
Heart	Aco2	-183.876	NA	NA	NA	NA	NA	NA	NA	-1	NA	NA	NA	NA	NA	NA	NA	0.000283529	NA	NA	NA	NA	NA	NA	NA	NA	NA	NA	NA	NA	NA	NA	0.31722
Heart	Frmpd4	0.570677	NA	NA	NA	NA	NA	NA	NA	1	NA	NA	NA	NA	NA	NA	NA	0.0498705	NA	NA	NA	NA	NA	NA	NA	NA	NA	NA	NA	NA	NA	NA	0.317141
Heart	Pramel3	0.25714	NA	NA	NA	NA	NA	NA	NA	1	NA	NA	NA	NA	NA	NA	NA	0.00937159	NA	NA	NA	NA	NA	NA	NA	NA	NA	NA	NA	NA	NA	NA	0.317071
Heart	Iars	6.0214	-13.539	NA	NA	NA	NA	NA	NA	0	-1	NA	NA	NA	NA	NA	NA	0.238751	0.0957194	NA	NA	NA	NA	NA	NA	12.5722	NA	NA	NA	NA	NA	NA	0.316828
Heart	Polr2c	-7.21561	NA	NA	NA	NA	NA	NA	NA	-1	NA	NA	NA	NA	NA	NA	NA	0.000123497	NA	NA	NA	NA	NA	NA	NA	NA	NA	NA	NA	NA	NA	NA	0.3168
Heart	Gm12289	0.850808	NA	NA	NA	NA	NA	NA	NA	1	NA	NA	NA	NA	NA	NA	NA	4.64474e-05	NA	NA	NA	NA	NA	NA	NA	NA	NA	NA	NA	NA	NA	NA	0.316759
Heart	Plin5	-37.0695	NA	NA	NA	NA	NA	NA	NA	-1	NA	NA	NA	NA	NA	NA	NA	2.55311e-05	NA	NA	NA	NA	NA	NA	NA	NA	NA	NA	NA	NA	NA	NA	0.316402
Heart	Gm46124	-0.59821	1.4053	NA	NA	NA	NA	NA	NA	0	1	NA	NA	NA	NA	NA	NA	0.124615	0.0899065	NA	NA	NA	NA	NA	NA	16.63	NA	NA	NA	NA	NA	NA	0.316296
Heart	Slc2a4	-53.6375	NA	NA	NA	NA	NA	NA	NA	-1	NA	NA	NA	NA	NA	NA	NA	9.80785e-05	NA	NA	NA	NA	NA	NA	NA	NA	NA	NA	NA	NA	NA	NA	0.31621
Heart	Mtr	26.289	-25.806	NA	NA	NA	NA	NA	NA	1	0	NA	NA	NA	NA	NA	NA	0.0814719	0.13201	NA	NA	NA	NA	NA	NA	16.8594	NA	NA	NA	NA	NA	NA	0.316128
Heart	Pcdhb22	1.31946	NA	NA	NA	NA	NA	NA	NA	1	NA	NA	NA	NA	NA	NA	NA	2.69518e-05	NA	NA	NA	NA	NA	NA	NA	NA	NA	NA	NA	NA	NA	NA	0.31549
Heart	Ppp1r14c	-231.82	4088.2	-21.501	NA	NA	NA	NA	NA	-1	0	0	NA	NA	NA	NA	NA	0.0854631	0.218341	0.154428	NA	NA	NA	NA	NA	8.79348	9.06885	NA	NA	NA	NA	NA	0.315284
Heart	Pbxip1	1855.1	-13.321	NA	NA	NA	NA	NA	NA	0	-1	NA	NA	NA	NA	NA	NA	0.22739	0.0738468	NA	NA	NA	NA	NA	NA	3.13595	NA	NA	NA	NA	NA	NA	0.315264
Heart	Syt11	-2.1751	NA	NA	NA	NA	NA	NA	NA	-1	NA	NA	NA	NA	NA	NA	NA	0.000112407	NA	NA	NA	NA	NA	NA	NA	NA	NA	NA	NA	NA	NA	NA	0.315169
Heart	Gsdme	5.0247	-441.99	NA	NA	NA	NA	NA	NA	1	0	NA	NA	NA	NA	NA	NA	0.0668202	0.328434	NA	NA	NA	NA	NA	NA	26.7868	NA	NA	NA	NA	NA	NA	0.315004
Heart	Mto1	-5.21077	NA	NA	NA	NA	NA	NA	NA	-1	NA	NA	NA	NA	NA	NA	NA	2.67273e-05	NA	NA	NA	NA	NA	NA	NA	NA	NA	NA	NA	NA	NA	NA	0.314975
Heart	Mrps24	-9.14304	NA	NA	NA	NA	NA	NA	NA	-1	NA	NA	NA	NA	NA	NA	NA	5.00256e-05	NA	NA	NA	NA	NA	NA	NA	NA	NA	NA	NA	NA	NA	NA	0.314835
Heart	Itgax	1.02227	NA	NA	NA	NA	NA	NA	NA	1	NA	NA	NA	NA	NA	NA	NA	0.000180468	NA	NA	NA	NA	NA	NA	NA	NA	NA	NA	NA	NA	NA	NA	0.314668
Heart	Iars2	-9.48657	NA	NA	NA	NA	NA	NA	NA	-1	NA	NA	NA	NA	NA	NA	NA	0.000124632	NA	NA	NA	NA	NA	NA	NA	NA	NA	NA	NA	NA	NA	NA	0.314173
Heart	Tfpi	-3.13295	NA	NA	NA	NA	NA	NA	NA	-1	NA	NA	NA	NA	NA	NA	NA	0.099782	NA	NA	NA	NA	NA	NA	NA	NA	NA	NA	NA	NA	NA	NA	0.313804
Heart	Perm1	60.072	-158.13	NA	NA	NA	NA	NA	NA	0	-1	NA	NA	NA	NA	NA	NA	0.135925	0.0885639	NA	NA	NA	NA	NA	NA	16.7306	NA	NA	NA	NA	NA	NA	0.31366
Heart	Camk2n2	-0.27618	214.9	NA	NA	NA	NA	NA	NA	-1	0	NA	NA	NA	NA	NA	NA	0.0925647	0.107632	NA	NA	NA	NA	NA	NA	26.9543	NA	NA	NA	NA	NA	NA	0.313492
Heart	Etfbkmt	91.28	-5.9725	NA	NA	NA	NA	NA	NA	0	-1	NA	NA	NA	NA	NA	NA	0.456162	0.0676314	NA	NA	NA	NA	NA	NA	4.0961	NA	NA	NA	NA	NA	NA	0.313228
Heart	Slc6a17	1.6331	NA	NA	NA	NA	NA	NA	NA	1	NA	NA	NA	NA	NA	NA	NA	3.66546e-05	NA	NA	NA	NA	NA	NA	NA	NA	NA	NA	NA	NA	NA	NA	0.313179
Heart	Fyb	0.011531	4.1387	NA	NA	NA	NA	NA	NA	0	1	NA	NA	NA	NA	NA	NA	0.495102	0.0921997	NA	NA	NA	NA	NA	NA	17.9343	NA	NA	NA	NA	NA	NA	0.313144
Heart	C1qbp	-10.0662	NA	NA	NA	NA	NA	NA	NA	-1	NA	NA	NA	NA	NA	NA	NA	6.37269e-05	NA	NA	NA	NA	NA	NA	NA	NA	NA	NA	NA	NA	NA	NA	0.312908
Heart	Oas3	0.12164	3.4522	NA	NA	NA	NA	NA	NA	0	1	NA	NA	NA	NA	NA	NA	0.393994	0.0940934	NA	NA	NA	NA	NA	NA	20.9514	NA	NA	NA	NA	NA	NA	0.312892
Heart	Blmh	-3.8367	186.72	NA	NA	NA	NA	NA	NA	-1	0	NA	NA	NA	NA	NA	NA	0.0722218	0.403328	NA	NA	NA	NA	NA	NA	26.6682	NA	NA	NA	NA	NA	NA	0.312785
Heart	Tarsl2	-4.15629	NA	NA	NA	NA	NA	NA	NA	-1	NA	NA	NA	NA	NA	NA	NA	0.000258163	NA	NA	NA	NA	NA	NA	NA	NA	NA	NA	NA	NA	NA	NA	0.312522
Heart	Gm42852	-51.222	0.47971	NA	NA	NA	NA	NA	NA	0	1	NA	NA	NA	NA	NA	NA	0.250625	0.0658005	NA	NA	NA	NA	NA	NA	3.13444	NA	NA	NA	NA	NA	NA	0.312411
Heart	Fuca2	-35.5197	NA	NA	NA	NA	NA	NA	NA	-1	NA	NA	NA	NA	NA	NA	NA	3.28568e-05	NA	NA	NA	NA	NA	NA	NA	NA	NA	NA	NA	NA	NA	NA	0.311866
Heart	Nfs1	-12.9471	NA	NA	NA	NA	NA	NA	NA	-1	NA	NA	NA	NA	NA	NA	NA	6.16144e-05	NA	NA	NA	NA	NA	NA	NA	NA	NA	NA	NA	NA	NA	NA	0.311256
Heart	Mr1	2.1754	NA	NA	NA	NA	NA	NA	NA	1	NA	NA	NA	NA	NA	NA	NA	4.57678e-05	NA	NA	NA	NA	NA	NA	NA	NA	NA	NA	NA	NA	NA	NA	0.31098
Heart	Vmn2r33	-0.1631	0.75847	NA	NA	NA	NA	NA	NA	0	1	NA	NA	NA	NA	NA	NA	0.271195	0.0919382	NA	NA	NA	NA	NA	NA	15.034	NA	NA	NA	NA	NA	NA	0.310748
Heart	Gpt2	-7.50882	NA	NA	NA	NA	NA	NA	NA	-1	NA	NA	NA	NA	NA	NA	NA	3.70145e-05	NA	NA	NA	NA	NA	NA	NA	NA	NA	NA	NA	NA	NA	NA	0.310734
Heart	Acadl	-104.307	NA	NA	NA	NA	NA	NA	NA	-1	NA	NA	NA	NA	NA	NA	NA	7.01326e-05	NA	NA	NA	NA	NA	NA	NA	NA	NA	NA	NA	NA	NA	NA	0.310732
Heart	Tnpo3	-6.97889	NA	NA	NA	NA	NA	NA	NA	-1	NA	NA	NA	NA	NA	NA	NA	3.32296e-05	NA	NA	NA	NA	NA	NA	NA	NA	NA	NA	NA	NA	NA	NA	0.310461
Heart	Tmem230	5.2269	-5.7921	NA	NA	NA	NA	NA	NA	0	-1	NA	NA	NA	NA	NA	NA	0.130345	0.0907625	NA	NA	NA	NA	NA	NA	12.2787	NA	NA	NA	NA	NA	NA	0.310373
Heart	Usp18	2.0182	NA	NA	NA	NA	NA	NA	NA	1	NA	NA	NA	NA	NA	NA	NA	0.000248437	NA	NA	NA	NA	NA	NA	NA	NA	NA	NA	NA	NA	NA	NA	0.310358
Heart	Atp1b4	0.333449	NA	NA	NA	NA	NA	NA	NA	1	NA	NA	NA	NA	NA	NA	NA	0.0555678	NA	NA	NA	NA	NA	NA	NA	NA	NA	NA	NA	NA	NA	NA	0.31031
Heart	Rint1	53.713	-2.6026	NA	NA	NA	NA	NA	NA	0	-1	NA	NA	NA	NA	NA	NA	0.441057	0.0675749	NA	NA	NA	NA	NA	NA	3.89733	NA	NA	NA	NA	NA	NA	0.310269
Heart	Map2k3	-10.4865	NA	NA	NA	NA	NA	NA	NA	-1	NA	NA	NA	NA	NA	NA	NA	6.25312e-05	NA	NA	NA	NA	NA	NA	NA	NA	NA	NA	NA	NA	NA	NA	0.310073
Heart	Otc	0.314156	NA	NA	NA	NA	NA	NA	NA	1	NA	NA	NA	NA	NA	NA	NA	0.0157318	NA	NA	NA	NA	NA	NA	NA	NA	NA	NA	NA	NA	NA	NA	0.310051
Heart	Nsmaf	-7.87379	NA	NA	NA	NA	NA	NA	NA	-1	NA	NA	NA	NA	NA	NA	NA	5.17025e-05	NA	NA	NA	NA	NA	NA	NA	NA	NA	NA	NA	NA	NA	NA	0.310001
Heart	Gucd1	-6.72257	NA	NA	NA	NA	NA	NA	NA	-1	NA	NA	NA	NA	NA	NA	NA	3.16369e-05	NA	NA	NA	NA	NA	NA	NA	NA	NA	NA	NA	NA	NA	NA	0.309962
Heart	Pkia	14.252	-92.631	NA	NA	NA	NA	NA	NA	0	-1	NA	NA	NA	NA	NA	NA	0.269454	0.0890006	NA	NA	NA	NA	NA	NA	17.5571	NA	NA	NA	NA	NA	NA	0.309915
Heart	Yipf4	-4.88361	NA	NA	NA	NA	NA	NA	NA	-1	NA	NA	NA	NA	NA	NA	NA	0.000110093	NA	NA	NA	NA	NA	NA	NA	NA	NA	NA	NA	NA	NA	NA	0.309641
Heart	Ar	1.37246	NA	NA	NA	NA	NA	NA	NA	1	NA	NA	NA	NA	NA	NA	NA	0.00732602	NA	NA	NA	NA	NA	NA	NA	NA	NA	NA	NA	NA	NA	NA	0.30961
Heart	Coa5	32.528	-74.675	NA	NA	NA	NA	NA	NA	0	-1	NA	NA	NA	NA	NA	NA	0.204505	0.0763684	NA	NA	NA	NA	NA	NA	14.6349	NA	NA	NA	NA	NA	NA	0.309578
Heart	Mrps9	-5.14196	NA	NA	NA	NA	NA	NA	NA	-1	NA	NA	NA	NA	NA	NA	NA	7.18035e-05	NA	NA	NA	NA	NA	NA	NA	NA	NA	NA	NA	NA	NA	NA	0.309413
Heart	Tmem150c	1.08276	NA	NA	NA	NA	NA	NA	NA	1	NA	NA	NA	NA	NA	NA	NA	0.0166379	NA	NA	NA	NA	NA	NA	NA	NA	NA	NA	NA	NA	NA	NA	0.309336
Heart	Golga7	-3.10594	NA	NA	NA	NA	NA	NA	NA	-1	NA	NA	NA	NA	NA	NA	NA	0.000161998	NA	NA	NA	NA	NA	NA	NA	NA	NA	NA	NA	NA	NA	NA	0.309274
Heart	Hspa4	77.993	-8.0402	NA	NA	NA	NA	NA	NA	0	-1	NA	NA	NA	NA	NA	NA	0.479129	0.0895567	NA	NA	NA	NA	NA	NA	4.77272	NA	NA	NA	NA	NA	NA	0.309065
Heart	Mrpl4	-11.4847	NA	NA	NA	NA	NA	NA	NA	-1	NA	NA	NA	NA	NA	NA	NA	0.000423605	NA	NA	NA	NA	NA	NA	NA	NA	NA	NA	NA	NA	NA	NA	0.30898
Heart	Gm16428	0.159016	NA	NA	NA	NA	NA	NA	NA	1	NA	NA	NA	NA	NA	NA	NA	0.0945637	NA	NA	NA	NA	NA	NA	NA	NA	NA	NA	NA	NA	NA	NA	0.308871
Heart	Taf6	0.43581	-9.9732	NA	NA	NA	NA	NA	NA	0	-1	NA	NA	NA	NA	NA	NA	0.425262	0.0932658	NA	NA	NA	NA	NA	NA	17.9181	NA	NA	NA	NA	NA	NA	0.308203
Heart	Cuzd1	0.626961	NA	NA	NA	NA	NA	NA	NA	1	NA	NA	NA	NA	NA	NA	NA	0.000133204	NA	NA	NA	NA	NA	NA	NA	NA	NA	NA	NA	NA	NA	NA	0.308107
Heart	Lepr	1.53053	NA	NA	NA	NA	NA	NA	NA	1	NA	NA	NA	NA	NA	NA	NA	0.010808	NA	NA	NA	NA	NA	NA	NA	NA	NA	NA	NA	NA	NA	NA	0.308004
Heart	Cep135	1.44545	NA	NA	NA	NA	NA	NA	NA	1	NA	NA	NA	NA	NA	NA	NA	6.90761e-05	NA	NA	NA	NA	NA	NA	NA	NA	NA	NA	NA	NA	NA	NA	0.307602
Heart	Gpr157	-6.60404	NA	NA	NA	NA	NA	NA	NA	-1	NA	NA	NA	NA	NA	NA	NA	0.000187348	NA	NA	NA	NA	NA	NA	NA	NA	NA	NA	NA	NA	NA	NA	0.307531
Heart	Gpx7	-1.1249	7.1142	NA	NA	NA	NA	NA	NA	-1	0	NA	NA	NA	NA	NA	NA	0.08826	0.117295	NA	NA	NA	NA	NA	NA	22.5861	NA	NA	NA	NA	NA	NA	0.307512
Heart	Riok3	-3.77252	NA	NA	NA	NA	NA	NA	NA	-1	NA	NA	NA	NA	NA	NA	NA	0.00489061	NA	NA	NA	NA	NA	NA	NA	NA	NA	NA	NA	NA	NA	NA	0.307419
Heart	Taf7l	0.413667	NA	NA	NA	NA	NA	NA	NA	1	NA	NA	NA	NA	NA	NA	NA	0.03541	NA	NA	NA	NA	NA	NA	NA	NA	NA	NA	NA	NA	NA	NA	0.307367
Heart	Hcn2	-3.53801	NA	NA	NA	NA	NA	NA	NA	-1	NA	NA	NA	NA	NA	NA	NA	3.47636e-05	NA	NA	NA	NA	NA	NA	NA	NA	NA	NA	NA	NA	NA	NA	0.307291
Heart	Ndrg4	-84.9493	NA	NA	NA	NA	NA	NA	NA	-1	NA	NA	NA	NA	NA	NA	NA	3.45905e-05	NA	NA	NA	NA	NA	NA	NA	NA	NA	NA	NA	NA	NA	NA	0.307246
Heart	Asrgl1	39.074	-5.097	NA	NA	NA	NA	NA	NA	0	-1	NA	NA	NA	NA	NA	NA	0.477677	0.0669531	NA	NA	NA	NA	NA	NA	5.09646	NA	NA	NA	NA	NA	NA	0.307107
Heart	Apool	-5.0829	NA	NA	NA	NA	NA	NA	NA	-1	NA	NA	NA	NA	NA	NA	NA	3.44735e-05	NA	NA	NA	NA	NA	NA	NA	NA	NA	NA	NA	NA	NA	NA	0.306975
Heart	Pde7a	-3037.2	3522.4	-12.489	NA	NA	NA	NA	NA	0	0	-1	NA	NA	NA	NA	NA	0.143436	0.130295	0.0869553	NA	NA	NA	NA	NA	4.60232	6.03413	NA	NA	NA	NA	NA	0.306942
Heart	Pmpca	21.256	-37.96	NA	NA	NA	NA	NA	NA	0	-1	NA	NA	NA	NA	NA	NA	0.171179	0.0779492	NA	NA	NA	NA	NA	NA	13.7348	NA	NA	NA	NA	NA	NA	0.306848
Heart	Ccl5	0.572492	NA	NA	NA	NA	NA	NA	NA	1	NA	NA	NA	NA	NA	NA	NA	5.53066e-05	NA	NA	NA	NA	NA	NA	NA	NA	NA	NA	NA	NA	NA	NA	0.306765
Heart	A330070K13Rik	0.74475	-0.62335	0.79358	NA	NA	NA	NA	NA	0	0	1	NA	NA	NA	NA	NA	0.212927	0.128759	0.0819231	NA	NA	NA	NA	NA	8.08796	16.7713	NA	NA	NA	NA	NA	0.306752
Heart	Tufm	-15.0921	NA	NA	NA	NA	NA	NA	NA	-1	NA	NA	NA	NA	NA	NA	NA	0.000330783	NA	NA	NA	NA	NA	NA	NA	NA	NA	NA	NA	NA	NA	NA	0.306512
Heart	Map1lc3b	-30.3538	NA	NA	NA	NA	NA	NA	NA	-1	NA	NA	NA	NA	NA	NA	NA	3.77199e-05	NA	NA	NA	NA	NA	NA	NA	NA	NA	NA	NA	NA	NA	NA	0.306424
Heart	Pdss2	1.17	-8.7765	NA	NA	NA	NA	NA	NA	0	-1	NA	NA	NA	NA	NA	NA	0.257429	0.0912333	NA	NA	NA	NA	NA	NA	18.0262	NA	NA	NA	NA	NA	NA	0.306285
Heart	Gm38059	-1.4317	0.54822	NA	NA	NA	NA	NA	NA	-1	1	NA	NA	NA	NA	NA	NA	0.0920597	0.0895911	NA	NA	NA	NA	NA	NA	9.89863	NA	NA	NA	NA	NA	NA	0.305873
Heart	Surf4	-15.1114	NA	NA	NA	NA	NA	NA	NA	-1	NA	NA	NA	NA	NA	NA	NA	6.69228e-05	NA	NA	NA	NA	NA	NA	NA	NA	NA	NA	NA	NA	NA	NA	0.305734
Heart	Olfr1364	-0.24197	1.3077	NA	NA	NA	NA	NA	NA	0	1	NA	NA	NA	NA	NA	NA	0.249841	0.09431	NA	NA	NA	NA	NA	NA	17.0455	NA	NA	NA	NA	NA	NA	0.305709
Heart	Mfn1	-29.0407	NA	NA	NA	NA	NA	NA	NA	-1	NA	NA	NA	NA	NA	NA	NA	0.000331376	NA	NA	NA	NA	NA	NA	NA	NA	NA	NA	NA	NA	NA	NA	0.305453
Heart	Ociad2	1.00675	NA	NA	NA	NA	NA	NA	NA	1	NA	NA	NA	NA	NA	NA	NA	0.00309507	NA	NA	NA	NA	NA	NA	NA	NA	NA	NA	NA	NA	NA	NA	0.305021
Heart	Coro1a	-2.168	8.673	NA	NA	NA	NA	NA	NA	0	1	NA	NA	NA	NA	NA	NA	0.312071	0.086685	NA	NA	NA	NA	NA	NA	13.6453	NA	NA	NA	NA	NA	NA	0.304744
Heart	Trim30d	0.927899	NA	NA	NA	NA	NA	NA	NA	1	NA	NA	NA	NA	NA	NA	NA	0.000518515	NA	NA	NA	NA	NA	NA	NA	NA	NA	NA	NA	NA	NA	NA	0.30468
Heart	Gm48508	-0.15818	1.2556	NA	NA	NA	NA	NA	NA	0	1	NA	NA	NA	NA	NA	NA	0.297066	0.087155	NA	NA	NA	NA	NA	NA	17.7662	NA	NA	NA	NA	NA	NA	0.30465
Heart	Car4	-3.82382	NA	NA	NA	NA	NA	NA	NA	-1	NA	NA	NA	NA	NA	NA	NA	0.000175876	NA	NA	NA	NA	NA	NA	NA	NA	NA	NA	NA	NA	NA	NA	0.304592
Heart	Itih5l-ps	0.363496	NA	NA	NA	NA	NA	NA	NA	1	NA	NA	NA	NA	NA	NA	NA	0.00667884	NA	NA	NA	NA	NA	NA	NA	NA	NA	NA	NA	NA	NA	NA	0.304489
Heart	Ampd3	-5.56395	NA	NA	NA	NA	NA	NA	NA	-1	NA	NA	NA	NA	NA	NA	NA	3.72729e-05	NA	NA	NA	NA	NA	NA	NA	NA	NA	NA	NA	NA	NA	NA	0.30445
Heart	Lsamp	2.97736	NA	NA	NA	NA	NA	NA	NA	1	NA	NA	NA	NA	NA	NA	NA	0.000464321	NA	NA	NA	NA	NA	NA	NA	NA	NA	NA	NA	NA	NA	NA	0.303845
Heart	Gm14772	0.217278	NA	NA	NA	NA	NA	NA	NA	1	NA	NA	NA	NA	NA	NA	NA	0.0114513	NA	NA	NA	NA	NA	NA	NA	NA	NA	NA	NA	NA	NA	NA	0.303634
Heart	Hsp90ab1	-165.559	NA	NA	NA	NA	NA	NA	NA	-1	NA	NA	NA	NA	NA	NA	NA	6.10591e-05	NA	NA	NA	NA	NA	NA	NA	NA	NA	NA	NA	NA	NA	NA	0.303374
Heart	Sgca	-12.6371	NA	NA	NA	NA	NA	NA	NA	-1	NA	NA	NA	NA	NA	NA	NA	0.00059863	NA	NA	NA	NA	NA	NA	NA	NA	NA	NA	NA	NA	NA	NA	0.303032
Heart	C4b	23.8346	NA	NA	NA	NA	NA	NA	NA	1	NA	NA	NA	NA	NA	NA	NA	0.000177265	NA	NA	NA	NA	NA	NA	NA	NA	NA	NA	NA	NA	NA	NA	0.302716
Heart	Apba3	-10.984	NA	NA	NA	NA	NA	NA	NA	-1	NA	NA	NA	NA	NA	NA	NA	8.42321e-05	NA	NA	NA	NA	NA	NA	NA	NA	NA	NA	NA	NA	NA	NA	0.30271
Heart	Cox10	-9.53268	NA	NA	NA	NA	NA	NA	NA	-1	NA	NA	NA	NA	NA	NA	NA	9.29567e-05	NA	NA	NA	NA	NA	NA	NA	NA	NA	NA	NA	NA	NA	NA	0.302553
Heart	Casp12	2.749	NA	NA	NA	NA	NA	NA	NA	1	NA	NA	NA	NA	NA	NA	NA	4.85481e-05	NA	NA	NA	NA	NA	NA	NA	NA	NA	NA	NA	NA	NA	NA	0.302543
Heart	Glul	111.32	-32.892	NA	NA	NA	NA	NA	NA	0	-1	NA	NA	NA	NA	NA	NA	0.156092	0.0774029	NA	NA	NA	NA	NA	NA	6.21752	NA	NA	NA	NA	NA	NA	0.302428
Heart	Sbno1	-2202.8	34.625	-8.6855	NA	NA	NA	NA	NA	0	0	-1	NA	NA	NA	NA	NA	0.124015	0.129508	0.0988186	NA	NA	NA	NA	NA	3.08409	10.3193	NA	NA	NA	NA	NA	0.302359
Heart	Mrps30	-4.63115	NA	NA	NA	NA	NA	NA	NA	-1	NA	NA	NA	NA	NA	NA	NA	4.00556e-05	NA	NA	NA	NA	NA	NA	NA	NA	NA	NA	NA	NA	NA	NA	0.302207
Heart	Adgrg4	0.567083	NA	NA	NA	NA	NA	NA	NA	1	NA	NA	NA	NA	NA	NA	NA	0.0864231	NA	NA	NA	NA	NA	NA	NA	NA	NA	NA	NA	NA	NA	NA	0.30212
Heart	Fate1	0.11519	NA	NA	NA	NA	NA	NA	NA	1	NA	NA	NA	NA	NA	NA	NA	0.0541552	NA	NA	NA	NA	NA	NA	NA	NA	NA	NA	NA	NA	NA	NA	0.302118
Heart	Gpr83	0.570067	NA	NA	NA	NA	NA	NA	NA	1	NA	NA	NA	NA	NA	NA	NA	5.68692e-05	NA	NA	NA	NA	NA	NA	NA	NA	NA	NA	NA	NA	NA	NA	0.302111
Heart	Tmem119	-2.85208	NA	NA	NA	NA	NA	NA	NA	-1	NA	NA	NA	NA	NA	NA	NA	0.000134293	NA	NA	NA	NA	NA	NA	NA	NA	NA	NA	NA	NA	NA	NA	0.301959
Heart	Mccc2	-7.27018	NA	NA	NA	NA	NA	NA	NA	-1	NA	NA	NA	NA	NA	NA	NA	0.000116794	NA	NA	NA	NA	NA	NA	NA	NA	NA	NA	NA	NA	NA	NA	0.301878
Heart	Gm32828	0.212261	NA	NA	NA	NA	NA	NA	NA	1	NA	NA	NA	NA	NA	NA	NA	0.00174912	NA	NA	NA	NA	NA	NA	NA	NA	NA	NA	NA	NA	NA	NA	0.301817
Heart	Ppp2r2c	0.622818	NA	NA	NA	NA	NA	NA	NA	1	NA	NA	NA	NA	NA	NA	NA	5.78833e-05	NA	NA	NA	NA	NA	NA	NA	NA	NA	NA	NA	NA	NA	NA	0.301686
Heart	Pla2g4e	2.08051	NA	NA	NA	NA	NA	NA	NA	1	NA	NA	NA	NA	NA	NA	NA	4.98219e-05	NA	NA	NA	NA	NA	NA	NA	NA	NA	NA	NA	NA	NA	NA	0.301581
Heart	Dzip3	-2.4267	8.9861	-6.9045	NA	NA	NA	NA	NA	0	1	0	NA	NA	NA	NA	NA	0.181737	0.0901147	0.228199	NA	NA	NA	NA	NA	14.9435	22.3175	NA	NA	NA	NA	NA	0.30148
Heart	Mrps25	-3.1801	NA	NA	NA	NA	NA	NA	NA	-1	NA	NA	NA	NA	NA	NA	NA	9.08366e-05	NA	NA	NA	NA	NA	NA	NA	NA	NA	NA	NA	NA	NA	NA	0.301462
Heart	Psen1	-3.85795	NA	NA	NA	NA	NA	NA	NA	-1	NA	NA	NA	NA	NA	NA	NA	0.000139561	NA	NA	NA	NA	NA	NA	NA	NA	NA	NA	NA	NA	NA	NA	0.301188
Heart	Aars2	-5.31712	NA	NA	NA	NA	NA	NA	NA	-1	NA	NA	NA	NA	NA	NA	NA	6.22043e-05	NA	NA	NA	NA	NA	NA	NA	NA	NA	NA	NA	NA	NA	NA	0.300962
Heart	Hs3st3b1	1.51927	NA	NA	NA	NA	NA	NA	NA	1	NA	NA	NA	NA	NA	NA	NA	4.18503e-05	NA	NA	NA	NA	NA	NA	NA	NA	NA	NA	NA	NA	NA	NA	0.300818
Heart	Uqcrc2	-63.9142	NA	NA	NA	NA	NA	NA	NA	-1	NA	NA	NA	NA	NA	NA	NA	7.68559e-05	NA	NA	NA	NA	NA	NA	NA	NA	NA	NA	NA	NA	NA	NA	0.300768
Heart	Igkv4-58	0.352338	NA	NA	NA	NA	NA	NA	NA	1	NA	NA	NA	NA	NA	NA	NA	0.000172168	NA	NA	NA	NA	NA	NA	NA	NA	NA	NA	NA	NA	NA	NA	0.300692
Heart	Tmem185a	-2.95037	NA	NA	NA	NA	NA	NA	NA	-1	NA	NA	NA	NA	NA	NA	NA	6.07437e-05	NA	NA	NA	NA	NA	NA	NA	NA	NA	NA	NA	NA	NA	NA	0.300666
Heart	Scin	2.02275	NA	NA	NA	NA	NA	NA	NA	1	NA	NA	NA	NA	NA	NA	NA	4.25928e-05	NA	NA	NA	NA	NA	NA	NA	NA	NA	NA	NA	NA	NA	NA	0.300425
Heart	Gm14895	0.41163	NA	NA	NA	NA	NA	NA	NA	1	NA	NA	NA	NA	NA	NA	NA	0.025283	NA	NA	NA	NA	NA	NA	NA	NA	NA	NA	NA	NA	NA	NA	0.300344
Heart	Mycbp2	-33.033	8.8451	-13.522	NA	NA	NA	NA	NA	0	1	0	NA	NA	NA	NA	NA	0.484843	0.0690752	0.246802	NA	NA	NA	NA	NA	5.87021	21.4608	NA	NA	NA	NA	NA	0.300134
Heart	Fam122b	1.01088	NA	NA	NA	NA	NA	NA	NA	1	NA	NA	NA	NA	NA	NA	NA	0.0254429	NA	NA	NA	NA	NA	NA	NA	NA	NA	NA	NA	NA	NA	NA	0.30013
Heart	Coro2a	0.405014	NA	NA	NA	NA	NA	NA	NA	1	NA	NA	NA	NA	NA	NA	NA	0.00269763	NA	NA	NA	NA	NA	NA	NA	NA	NA	NA	NA	NA	NA	NA	0.299954
Heart	Capn3	0.903777	NA	NA	NA	NA	NA	NA	NA	1	NA	NA	NA	NA	NA	NA	NA	0.000839974	NA	NA	NA	NA	NA	NA	NA	NA	NA	NA	NA	NA	NA	NA	0.299643
Heart	Rtn3	10.575	-18.421	NA	NA	NA	NA	NA	NA	0	-1	NA	NA	NA	NA	NA	NA	0.268356	0.0749134	NA	NA	NA	NA	NA	NA	11.5498	NA	NA	NA	NA	NA	NA	0.299567
Heart	Tcp1	-15.1325	NA	NA	NA	NA	NA	NA	NA	-1	NA	NA	NA	NA	NA	NA	NA	5.17492e-05	NA	NA	NA	NA	NA	NA	NA	NA	NA	NA	NA	NA	NA	NA	0.29956
Heart	Wnk2	-9.26288	NA	NA	NA	NA	NA	NA	NA	-1	NA	NA	NA	NA	NA	NA	NA	0.000105678	NA	NA	NA	NA	NA	NA	NA	NA	NA	NA	NA	NA	NA	NA	0.299091
Heart	Tceal8	-1.2352	NA	NA	NA	NA	NA	NA	NA	-1	NA	NA	NA	NA	NA	NA	NA	0.0044349	NA	NA	NA	NA	NA	NA	NA	NA	NA	NA	NA	NA	NA	NA	0.298651
Heart	Prkcz	2.6412	NA	NA	NA	NA	NA	NA	NA	1	NA	NA	NA	NA	NA	NA	NA	7.40401e-05	NA	NA	NA	NA	NA	NA	NA	NA	NA	NA	NA	NA	NA	NA	0.298596
Heart	H6pd	-4.44537	NA	NA	NA	NA	NA	NA	NA	-1	NA	NA	NA	NA	NA	NA	NA	0.000917371	NA	NA	NA	NA	NA	NA	NA	NA	NA	NA	NA	NA	NA	NA	0.298539
Heart	Mylk3	-77.3821	NA	NA	NA	NA	NA	NA	NA	-1	NA	NA	NA	NA	NA	NA	NA	6.9054e-05	NA	NA	NA	NA	NA	NA	NA	NA	NA	NA	NA	NA	NA	NA	0.298435
Heart	5730507A11Rik	0.894713	NA	NA	NA	NA	NA	NA	NA	1	NA	NA	NA	NA	NA	NA	NA	6.76399e-05	NA	NA	NA	NA	NA	NA	NA	NA	NA	NA	NA	NA	NA	NA	0.298415
Heart	Ssxb2	0.188941	NA	NA	NA	NA	NA	NA	NA	1	NA	NA	NA	NA	NA	NA	NA	0.0450087	NA	NA	NA	NA	NA	NA	NA	NA	NA	NA	NA	NA	NA	NA	0.298112
Heart	Sbk1	-20.548	NA	NA	NA	NA	NA	NA	NA	-1	NA	NA	NA	NA	NA	NA	NA	0.000172089	NA	NA	NA	NA	NA	NA	NA	NA	NA	NA	NA	NA	NA	NA	0.297837
Heart	Mpv17	-9.22644	NA	NA	NA	NA	NA	NA	NA	-1	NA	NA	NA	NA	NA	NA	NA	8.88232e-05	NA	NA	NA	NA	NA	NA	NA	NA	NA	NA	NA	NA	NA	NA	0.297597
Heart	Uba1y-ps2	0.286353	NA	NA	NA	NA	NA	NA	NA	1	NA	NA	NA	NA	NA	NA	NA	0.0232407	NA	NA	NA	NA	NA	NA	NA	NA	NA	NA	NA	NA	NA	NA	0.297405
Heart	Etfb	-32.239	NA	NA	NA	NA	NA	NA	NA	-1	NA	NA	NA	NA	NA	NA	NA	4.80072e-05	NA	NA	NA	NA	NA	NA	NA	NA	NA	NA	NA	NA	NA	NA	0.297204
Heart	Gata3	0.875262	NA	NA	NA	NA	NA	NA	NA	1	NA	NA	NA	NA	NA	NA	NA	0.000145196	NA	NA	NA	NA	NA	NA	NA	NA	NA	NA	NA	NA	NA	NA	0.297094
Heart	Rmnd1	-6.27549	NA	NA	NA	NA	NA	NA	NA	-1	NA	NA	NA	NA	NA	NA	NA	0.000100476	NA	NA	NA	NA	NA	NA	NA	NA	NA	NA	NA	NA	NA	NA	0.296936
Heart	Daw1	0.255073	NA	NA	NA	NA	NA	NA	NA	1	NA	NA	NA	NA	NA	NA	NA	0.0938742	NA	NA	NA	NA	NA	NA	NA	NA	NA	NA	NA	NA	NA	NA	0.296828
Heart	Coq6	-6.26597	NA	NA	NA	NA	NA	NA	NA	-1	NA	NA	NA	NA	NA	NA	NA	0.000373141	NA	NA	NA	NA	NA	NA	NA	NA	NA	NA	NA	NA	NA	NA	0.29682
Heart	Slc25a19	-4.35401	NA	NA	NA	NA	NA	NA	NA	-1	NA	NA	NA	NA	NA	NA	NA	0.000291066	NA	NA	NA	NA	NA	NA	NA	NA	NA	NA	NA	NA	NA	NA	0.29678
Heart	Gm25007	0.29978	-16.655	NA	NA	NA	NA	NA	NA	1	0	NA	NA	NA	NA	NA	NA	0.0714142	0.41716	NA	NA	NA	NA	NA	NA	26.5841	NA	NA	NA	NA	NA	NA	0.296652
Heart	Ipo13	-9.15928	NA	NA	NA	NA	NA	NA	NA	-1	NA	NA	NA	NA	NA	NA	NA	0.0100069	NA	NA	NA	NA	NA	NA	NA	NA	NA	NA	NA	NA	NA	NA	0.296622
Heart	Aldh6a1	34.068	-60.059	NA	NA	NA	NA	NA	NA	0	-1	NA	NA	NA	NA	NA	NA	0.189564	0.0893193	NA	NA	NA	NA	NA	NA	12.7791	NA	NA	NA	NA	NA	NA	0.296565
Heart	Dld	20.913	-62.22	NA	NA	NA	NA	NA	NA	0	-1	NA	NA	NA	NA	NA	NA	0.272576	0.0897584	NA	NA	NA	NA	NA	NA	13.2345	NA	NA	NA	NA	NA	NA	0.296278
Heart	Slc25a39	4268	-20.325	NA	NA	NA	NA	NA	NA	0	-1	NA	NA	NA	NA	NA	NA	0.172288	0.0731995	NA	NA	NA	NA	NA	NA	3.08127	NA	NA	NA	NA	NA	NA	0.295911
Heart	Cyc1	-105.013	NA	NA	NA	NA	NA	NA	NA	-1	NA	NA	NA	NA	NA	NA	NA	0.000169174	NA	NA	NA	NA	NA	NA	NA	NA	NA	NA	NA	NA	NA	NA	0.295857
Heart	Adh5	-5.66685	NA	NA	NA	NA	NA	NA	NA	-1	NA	NA	NA	NA	NA	NA	NA	0.000139712	NA	NA	NA	NA	NA	NA	NA	NA	NA	NA	NA	NA	NA	NA	0.295315
Heart	Gm15433	0.738953	NA	NA	NA	NA	NA	NA	NA	1	NA	NA	NA	NA	NA	NA	NA	8.87353e-05	NA	NA	NA	NA	NA	NA	NA	NA	NA	NA	NA	NA	NA	NA	0.295255
Heart	Gm17477	0.573993	NA	NA	NA	NA	NA	NA	NA	1	NA	NA	NA	NA	NA	NA	NA	0.0187249	NA	NA	NA	NA	NA	NA	NA	NA	NA	NA	NA	NA	NA	NA	0.295145
Heart	Alms1-ps2	0.53724	NA	NA	NA	NA	NA	NA	NA	1	NA	NA	NA	NA	NA	NA	NA	0.00118042	NA	NA	NA	NA	NA	NA	NA	NA	NA	NA	NA	NA	NA	NA	0.295003
Heart	Rbbp5	2.4745	-10.737	NA	NA	NA	NA	NA	NA	0	-1	NA	NA	NA	NA	NA	NA	0.177817	0.084574	NA	NA	NA	NA	NA	NA	17.9993	NA	NA	NA	NA	NA	NA	0.294948
Heart	Gm47424	-0.22682	0.92126	NA	NA	NA	NA	NA	NA	0	1	NA	NA	NA	NA	NA	NA	0.291078	0.0837738	NA	NA	NA	NA	NA	NA	14.9443	NA	NA	NA	NA	NA	NA	0.294924
Heart	Spryd4	-3.56761	NA	NA	NA	NA	NA	NA	NA	-1	NA	NA	NA	NA	NA	NA	NA	5.16622e-05	NA	NA	NA	NA	NA	NA	NA	NA	NA	NA	NA	NA	NA	NA	0.294871
Heart	Kmt5a	-17.3445	NA	NA	NA	NA	NA	NA	NA	-1	NA	NA	NA	NA	NA	NA	NA	0.00055154	NA	NA	NA	NA	NA	NA	NA	NA	NA	NA	NA	NA	NA	NA	0.294791
Heart	Hadh	-54.0487	NA	NA	NA	NA	NA	NA	NA	-1	NA	NA	NA	NA	NA	NA	NA	0.000598842	NA	NA	NA	NA	NA	NA	NA	NA	NA	NA	NA	NA	NA	NA	0.294787
Heart	Gm37936	0.424477	NA	NA	NA	NA	NA	NA	NA	1	NA	NA	NA	NA	NA	NA	NA	9.27734e-05	NA	NA	NA	NA	NA	NA	NA	NA	NA	NA	NA	NA	NA	NA	0.294512
Heart	Gm44901	3.8943	-4.8141	3.5373	-1.6759	NA	NA	NA	NA	1	0	0	0	NA	NA	NA	NA	0.0862245	0.492745	0.139168	0.200981	NA	NA	NA	NA	9.15638	14.612	20.9735	NA	NA	NA	NA	0.294447
Heart	Amz2	-5.62848	NA	NA	NA	NA	NA	NA	NA	-1	NA	NA	NA	NA	NA	NA	NA	7.71186e-05	NA	NA	NA	NA	NA	NA	NA	NA	NA	NA	NA	NA	NA	NA	0.293975
Heart	Impact	10.781	-10.753	NA	NA	NA	NA	NA	NA	1	0	NA	NA	NA	NA	NA	NA	0.0797457	0.127577	NA	NA	NA	NA	NA	NA	16.59	NA	NA	NA	NA	NA	NA	0.293814
Heart	Nipal3	-1.99913	NA	NA	NA	NA	NA	NA	NA	-1	NA	NA	NA	NA	NA	NA	NA	5.54987e-05	NA	NA	NA	NA	NA	NA	NA	NA	NA	NA	NA	NA	NA	NA	0.293712
Heart	Fntb	271.72	-2.65	NA	NA	NA	NA	NA	NA	0	-1	NA	NA	NA	NA	NA	NA	0.285734	0.0798338	NA	NA	NA	NA	NA	NA	3.17996	NA	NA	NA	NA	NA	NA	0.293428
Heart	Arhgap9	1.52003	NA	NA	NA	NA	NA	NA	NA	1	NA	NA	NA	NA	NA	NA	NA	0.000287204	NA	NA	NA	NA	NA	NA	NA	NA	NA	NA	NA	NA	NA	NA	0.292947
Heart	4933411O13Rik	-0.14798	1.2373	NA	NA	NA	NA	NA	NA	0	1	NA	NA	NA	NA	NA	NA	0.311818	0.0907977	NA	NA	NA	NA	NA	NA	17.4724	NA	NA	NA	NA	NA	NA	0.292939
Heart	Cep250	1.59667	NA	NA	NA	NA	NA	NA	NA	1	NA	NA	NA	NA	NA	NA	NA	0.000365308	NA	NA	NA	NA	NA	NA	NA	NA	NA	NA	NA	NA	NA	NA	0.292879
Heart	Samm50	-20.4372	NA	NA	NA	NA	NA	NA	NA	-1	NA	NA	NA	NA	NA	NA	NA	0.000111424	NA	NA	NA	NA	NA	NA	NA	NA	NA	NA	NA	NA	NA	NA	0.292711
Heart	Gli3	1.49674	NA	NA	NA	NA	NA	NA	NA	1	NA	NA	NA	NA	NA	NA	NA	8.55171e-05	NA	NA	NA	NA	NA	NA	NA	NA	NA	NA	NA	NA	NA	NA	0.292497
Heart	Atp6v0c	-4.9225	2650.8	NA	NA	NA	NA	NA	NA	-1	0	NA	NA	NA	NA	NA	NA	0.0779548	0.127732	NA	NA	NA	NA	NA	NA	26.9609	NA	NA	NA	NA	NA	NA	0.292312
Heart	Uckl1	-4.84274	NA	NA	NA	NA	NA	NA	NA	-1	NA	NA	NA	NA	NA	NA	NA	0.000117806	NA	NA	NA	NA	NA	NA	NA	NA	NA	NA	NA	NA	NA	NA	0.292297
Heart	Tmem59	-9.9462	NA	NA	NA	NA	NA	NA	NA	-1	NA	NA	NA	NA	NA	NA	NA	7.07071e-05	NA	NA	NA	NA	NA	NA	NA	NA	NA	NA	NA	NA	NA	NA	0.292148
Heart	Suclg1	-33.3956	NA	NA	NA	NA	NA	NA	NA	-1	NA	NA	NA	NA	NA	NA	NA	0.000174534	NA	NA	NA	NA	NA	NA	NA	NA	NA	NA	NA	NA	NA	NA	0.292134
Heart	Htra1	-11.7005	NA	NA	NA	NA	NA	NA	NA	-1	NA	NA	NA	NA	NA	NA	NA	5.57806e-05	NA	NA	NA	NA	NA	NA	NA	NA	NA	NA	NA	NA	NA	NA	0.29202
Heart	Zcchc8	-1.76	NA	NA	NA	NA	NA	NA	NA	-1	NA	NA	NA	NA	NA	NA	NA	0.000931854	NA	NA	NA	NA	NA	NA	NA	NA	NA	NA	NA	NA	NA	NA	0.291897
Heart	Npr3	1.73573	NA	NA	NA	NA	NA	NA	NA	1	NA	NA	NA	NA	NA	NA	NA	0.00206658	NA	NA	NA	NA	NA	NA	NA	NA	NA	NA	NA	NA	NA	NA	0.291839
Heart	Scarb1	-5.21296	NA	NA	NA	NA	NA	NA	NA	-1	NA	NA	NA	NA	NA	NA	NA	7.71421e-05	NA	NA	NA	NA	NA	NA	NA	NA	NA	NA	NA	NA	NA	NA	0.291777
Heart	Vegfd	1.17607	NA	NA	NA	NA	NA	NA	NA	1	NA	NA	NA	NA	NA	NA	NA	0.000107524	NA	NA	NA	NA	NA	NA	NA	NA	NA	NA	NA	NA	NA	NA	0.291613
Heart	Il13ra2	0.401794	NA	NA	NA	NA	NA	NA	NA	1	NA	NA	NA	NA	NA	NA	NA	0.0150849	NA	NA	NA	NA	NA	NA	NA	NA	NA	NA	NA	NA	NA	NA	0.291611
Heart	Wipi1	-8.21869	NA	NA	NA	NA	NA	NA	NA	-1	NA	NA	NA	NA	NA	NA	NA	0.00681615	NA	NA	NA	NA	NA	NA	NA	NA	NA	NA	NA	NA	NA	NA	0.291422
Heart	Rbm41	0.752747	NA	NA	NA	NA	NA	NA	NA	1	NA	NA	NA	NA	NA	NA	NA	0.0395757	NA	NA	NA	NA	NA	NA	NA	NA	NA	NA	NA	NA	NA	NA	0.291414
Heart	Neurod4	0.300844	NA	NA	NA	NA	NA	NA	NA	1	NA	NA	NA	NA	NA	NA	NA	0.00075652	NA	NA	NA	NA	NA	NA	NA	NA	NA	NA	NA	NA	NA	NA	0.291177
Heart	Tmem126b	3.242	-10.429	NA	NA	NA	NA	NA	NA	0	-1	NA	NA	NA	NA	NA	NA	0.281785	0.0882171	NA	NA	NA	NA	NA	NA	13.9579	NA	NA	NA	NA	NA	NA	0.291145
Heart	Mrpl35	-4.25101	NA	NA	NA	NA	NA	NA	NA	-1	NA	NA	NA	NA	NA	NA	NA	0.000267638	NA	NA	NA	NA	NA	NA	NA	NA	NA	NA	NA	NA	NA	NA	0.291122
Heart	Dram1	30.947	-1.6051	NA	NA	NA	NA	NA	NA	0	-1	NA	NA	NA	NA	NA	NA	0.457149	0.0864599	NA	NA	NA	NA	NA	NA	4.32995	NA	NA	NA	NA	NA	NA	0.291074
Heart	Lpin1	-15.6521	NA	NA	NA	NA	NA	NA	NA	-1	NA	NA	NA	NA	NA	NA	NA	0.000105393	NA	NA	NA	NA	NA	NA	NA	NA	NA	NA	NA	NA	NA	NA	0.290757
Heart	Magix	0.87317	-10.485	NA	NA	NA	NA	NA	NA	0	-1	NA	NA	NA	NA	NA	NA	0.36333	0.0927902	NA	NA	NA	NA	NA	NA	17.7433	NA	NA	NA	NA	NA	NA	0.290689
Heart	Aqp1	-108.008	NA	NA	NA	NA	NA	NA	NA	-1	NA	NA	NA	NA	NA	NA	NA	6.02576e-05	NA	NA	NA	NA	NA	NA	NA	NA	NA	NA	NA	NA	NA	NA	0.290676
Heart	Ttl	-1.92223	NA	NA	NA	NA	NA	NA	NA	-1	NA	NA	NA	NA	NA	NA	NA	7.5631e-05	NA	NA	NA	NA	NA	NA	NA	NA	NA	NA	NA	NA	NA	NA	0.290501
Heart	4930519A11Rik	0.259089	NA	NA	NA	NA	NA	NA	NA	1	NA	NA	NA	NA	NA	NA	NA	0.000650819	NA	NA	NA	NA	NA	NA	NA	NA	NA	NA	NA	NA	NA	NA	0.290441
Heart	Cd74	72.079	NA	NA	NA	NA	NA	NA	NA	1	NA	NA	NA	NA	NA	NA	NA	6.34298e-05	NA	NA	NA	NA	NA	NA	NA	NA	NA	NA	NA	NA	NA	NA	0.290419
Heart	Pop4	-8.1042	1.2566	NA	NA	NA	NA	NA	NA	0	1	NA	NA	NA	NA	NA	NA	0.483859	0.0775601	NA	NA	NA	NA	NA	NA	5.93489	NA	NA	NA	NA	NA	NA	0.290273
Heart	Mlip	5.3734	-17.6	NA	NA	NA	NA	NA	NA	0	-1	NA	NA	NA	NA	NA	NA	0.26232	0.0770502	NA	NA	NA	NA	NA	NA	14.9435	NA	NA	NA	NA	NA	NA	0.290247
Heart	Cops3	9.891	-9.1021	NA	NA	NA	NA	NA	NA	0	-1	NA	NA	NA	NA	NA	NA	0.177736	0.0787505	NA	NA	NA	NA	NA	NA	10.3708	NA	NA	NA	NA	NA	NA	0.290204
Heart	A530076I17Rik	-44.814	0.67128	NA	NA	NA	NA	NA	NA	0	1	NA	NA	NA	NA	NA	NA	0.351712	0.0808985	NA	NA	NA	NA	NA	NA	3.38581	NA	NA	NA	NA	NA	NA	0.290082
Heart	Il1rapl2	0.43446	NA	NA	NA	NA	NA	NA	NA	1	NA	NA	NA	NA	NA	NA	NA	0.0334488	NA	NA	NA	NA	NA	NA	NA	NA	NA	NA	NA	NA	NA	NA	0.289975
Heart	Sgms1	23.786	-15.015	NA	NA	NA	NA	NA	NA	0	-1	NA	NA	NA	NA	NA	NA	0.256275	0.0708266	NA	NA	NA	NA	NA	NA	8.9471	NA	NA	NA	NA	NA	NA	0.289805
Heart	Trav3-4	-0.10932	0.87909	NA	NA	NA	NA	NA	NA	0	1	NA	NA	NA	NA	NA	NA	0.27452	0.0946067	NA	NA	NA	NA	NA	NA	18.0262	NA	NA	NA	NA	NA	NA	0.289792
Heart	Egr1	10.816	NA	NA	NA	NA	NA	NA	NA	1	NA	NA	NA	NA	NA	NA	NA	0.000368284	NA	NA	NA	NA	NA	NA	NA	NA	NA	NA	NA	NA	NA	NA	0.289696
Heart	Ryr2	70.684	-232.6	NA	NA	NA	NA	NA	NA	0	-1	NA	NA	NA	NA	NA	NA	0.253907	0.0817174	NA	NA	NA	NA	NA	NA	14.9424	NA	NA	NA	NA	NA	NA	0.289664
Heart	Capn7	11.259	-13.3	NA	NA	NA	NA	NA	NA	0	-1	NA	NA	NA	NA	NA	NA	0.126319	0.0826051	NA	NA	NA	NA	NA	NA	14.9435	NA	NA	NA	NA	NA	NA	0.289648
Heart	Stx5a	-3.48473	NA	NA	NA	NA	NA	NA	NA	-1	NA	NA	NA	NA	NA	NA	NA	8.13971e-05	NA	NA	NA	NA	NA	NA	NA	NA	NA	NA	NA	NA	NA	NA	0.289436
Heart	Btbd2	-11.1533	NA	NA	NA	NA	NA	NA	NA	-1	NA	NA	NA	NA	NA	NA	NA	6.11078e-05	NA	NA	NA	NA	NA	NA	NA	NA	NA	NA	NA	NA	NA	NA	0.289298
Heart	Poli	-0.54369	2.5329	NA	NA	NA	NA	NA	NA	0	1	NA	NA	NA	NA	NA	NA	0.227595	0.0946613	NA	NA	NA	NA	NA	NA	16.662	NA	NA	NA	NA	NA	NA	0.289277
Heart	Ltbp2	3.46494	NA	NA	NA	NA	NA	NA	NA	1	NA	NA	NA	NA	NA	NA	NA	0.000163748	NA	NA	NA	NA	NA	NA	NA	NA	NA	NA	NA	NA	NA	NA	0.289134
Heart	Rnf128	-12.3767	NA	NA	NA	NA	NA	NA	NA	-1	NA	NA	NA	NA	NA	NA	NA	6.50295e-05	NA	NA	NA	NA	NA	NA	NA	NA	NA	NA	NA	NA	NA	NA	0.289059
Heart	Cdh18	-0.74177	2.2294	NA	NA	NA	NA	NA	NA	0	1	NA	NA	NA	NA	NA	NA	0.237749	0.0808663	NA	NA	NA	NA	NA	NA	14.9442	NA	NA	NA	NA	NA	NA	0.288937
Heart	Adk	-13.8354	NA	NA	NA	NA	NA	NA	NA	-1	NA	NA	NA	NA	NA	NA	NA	6.28732e-05	NA	NA	NA	NA	NA	NA	NA	NA	NA	NA	NA	NA	NA	NA	0.288871
Heart	Gm14911	0.254885	NA	NA	NA	NA	NA	NA	NA	1	NA	NA	NA	NA	NA	NA	NA	0.0173093	NA	NA	NA	NA	NA	NA	NA	NA	NA	NA	NA	NA	NA	NA	0.288585
Heart	H2-Ab1	32.179	NA	NA	NA	NA	NA	NA	NA	1	NA	NA	NA	NA	NA	NA	NA	6.23008e-05	NA	NA	NA	NA	NA	NA	NA	NA	NA	NA	NA	NA	NA	NA	0.288579
Heart	Dcx	0.506249	NA	NA	NA	NA	NA	NA	NA	1	NA	NA	NA	NA	NA	NA	NA	0.072536	NA	NA	NA	NA	NA	NA	NA	NA	NA	NA	NA	NA	NA	NA	0.288515
Heart	Gm44620	0.39371	NA	NA	NA	NA	NA	NA	NA	1	NA	NA	NA	NA	NA	NA	NA	0.00123514	NA	NA	NA	NA	NA	NA	NA	NA	NA	NA	NA	NA	NA	NA	0.288437
Heart	Gm6109	0.05275	111.4	-2.5196	NA	NA	NA	NA	NA	0	0	-1	NA	NA	NA	NA	NA	0.370934	0.165642	0.0965105	NA	NA	NA	NA	NA	20.9481	21.0677	NA	NA	NA	NA	NA	0.288433
Heart	4932414J04Rik	0.544059	NA	NA	NA	NA	NA	NA	NA	1	NA	NA	NA	NA	NA	NA	NA	6.16928e-05	NA	NA	NA	NA	NA	NA	NA	NA	NA	NA	NA	NA	NA	NA	0.28837
Heart	Rhoh	-3.0515	1.2451	NA	NA	NA	NA	NA	NA	0	1	NA	NA	NA	NA	NA	NA	0.192036	0.0725162	NA	NA	NA	NA	NA	NA	7.49418	NA	NA	NA	NA	NA	NA	0.288263
Heart	Gm14780	0.146924	NA	NA	NA	NA	NA	NA	NA	1	NA	NA	NA	NA	NA	NA	NA	0.0756183	NA	NA	NA	NA	NA	NA	NA	NA	NA	NA	NA	NA	NA	NA	0.288239
Heart	Ndufa10	-54.1419	NA	NA	NA	NA	NA	NA	NA	-1	NA	NA	NA	NA	NA	NA	NA	0.000832334	NA	NA	NA	NA	NA	NA	NA	NA	NA	NA	NA	NA	NA	NA	0.288126
Heart	Fnta	-7.66754	NA	NA	NA	NA	NA	NA	NA	-1	NA	NA	NA	NA	NA	NA	NA	6.26572e-05	NA	NA	NA	NA	NA	NA	NA	NA	NA	NA	NA	NA	NA	NA	0.287967
Heart	Dhrs11	6.1946	-17.813	NA	NA	NA	NA	NA	NA	0	-1	NA	NA	NA	NA	NA	NA	0.237396	0.0925333	NA	NA	NA	NA	NA	NA	14.9832	NA	NA	NA	NA	NA	NA	0.287925
Heart	Fh1	-36.8916	NA	NA	NA	NA	NA	NA	NA	-1	NA	NA	NA	NA	NA	NA	NA	7.14626e-05	NA	NA	NA	NA	NA	NA	NA	NA	NA	NA	NA	NA	NA	NA	0.287786
Heart	Lrrtm2	-420.14	1.4953	NA	NA	NA	NA	NA	NA	0	1	NA	NA	NA	NA	NA	NA	0.20035	0.0787982	NA	NA	NA	NA	NA	NA	3.04831	NA	NA	NA	NA	NA	NA	0.287674
Heart	Tprgl	-13.7689	NA	NA	NA	NA	NA	NA	NA	-1	NA	NA	NA	NA	NA	NA	NA	6.58531e-05	NA	NA	NA	NA	NA	NA	NA	NA	NA	NA	NA	NA	NA	NA	0.287163
Heart	Maea	-7.4451	NA	NA	NA	NA	NA	NA	NA	-1	NA	NA	NA	NA	NA	NA	NA	0.000835795	NA	NA	NA	NA	NA	NA	NA	NA	NA	NA	NA	NA	NA	NA	0.286795
Heart	Hps6	-1.79931	NA	NA	NA	NA	NA	NA	NA	-1	NA	NA	NA	NA	NA	NA	NA	6.8849e-05	NA	NA	NA	NA	NA	NA	NA	NA	NA	NA	NA	NA	NA	NA	0.286686
Heart	Ppargc1a	-18.5001	NA	NA	NA	NA	NA	NA	NA	-1	NA	NA	NA	NA	NA	NA	NA	0.000188391	NA	NA	NA	NA	NA	NA	NA	NA	NA	NA	NA	NA	NA	NA	0.286684
Heart	Klhl21	-18.965	NA	NA	NA	NA	NA	NA	NA	-1	NA	NA	NA	NA	NA	NA	NA	0.000106743	NA	NA	NA	NA	NA	NA	NA	NA	NA	NA	NA	NA	NA	NA	0.286674
Heart	Osr1	-0.904755	NA	NA	NA	NA	NA	NA	NA	-1	NA	NA	NA	NA	NA	NA	NA	0.0129049	NA	NA	NA	NA	NA	NA	NA	NA	NA	NA	NA	NA	NA	NA	0.2866
Heart	Rpn2	-9.13649	NA	NA	NA	NA	NA	NA	NA	-1	NA	NA	NA	NA	NA	NA	NA	6.78961e-05	NA	NA	NA	NA	NA	NA	NA	NA	NA	NA	NA	NA	NA	NA	0.28647
Heart	Lrmda	0.759959	NA	NA	NA	NA	NA	NA	NA	1	NA	NA	NA	NA	NA	NA	NA	0.000274066	NA	NA	NA	NA	NA	NA	NA	NA	NA	NA	NA	NA	NA	NA	0.285933
Heart	Snap23	9.2518	-8.9024	NA	NA	NA	NA	NA	NA	0	-1	NA	NA	NA	NA	NA	NA	0.190671	0.0821547	NA	NA	NA	NA	NA	NA	10.1039	NA	NA	NA	NA	NA	NA	0.285872
Heart	Exoc7	-4.74507	NA	NA	NA	NA	NA	NA	NA	-1	NA	NA	NA	NA	NA	NA	NA	0.000141001	NA	NA	NA	NA	NA	NA	NA	NA	NA	NA	NA	NA	NA	NA	0.285711
Heart	Csde1	72.039	-137.86	NA	NA	NA	NA	NA	NA	0	-1	NA	NA	NA	NA	NA	NA	0.190449	0.0827163	NA	NA	NA	NA	NA	NA	13.6543	NA	NA	NA	NA	NA	NA	0.28536
Heart	Tal2	-0.7032	0.79898	NA	NA	NA	NA	NA	NA	0	1	NA	NA	NA	NA	NA	NA	0.123997	0.0840613	NA	NA	NA	NA	NA	NA	13.7116	NA	NA	NA	NA	NA	NA	0.285091
Heart	Slc25a13	-14.5105	NA	NA	NA	NA	NA	NA	NA	-1	NA	NA	NA	NA	NA	NA	NA	8.79089e-05	NA	NA	NA	NA	NA	NA	NA	NA	NA	NA	NA	NA	NA	NA	0.285066
Heart	Cd320	-2.64532	NA	NA	NA	NA	NA	NA	NA	-1	NA	NA	NA	NA	NA	NA	NA	0.000114137	NA	NA	NA	NA	NA	NA	NA	NA	NA	NA	NA	NA	NA	NA	0.285005
Heart	Smarca5-ps	0.74291	NA	NA	NA	NA	NA	NA	NA	1	NA	NA	NA	NA	NA	NA	NA	8.68146e-05	NA	NA	NA	NA	NA	NA	NA	NA	NA	NA	NA	NA	NA	NA	0.284894
Heart	Nqo1	12.5664	NA	NA	NA	NA	NA	NA	NA	1	NA	NA	NA	NA	NA	NA	NA	0.000146654	NA	NA	NA	NA	NA	NA	NA	NA	NA	NA	NA	NA	NA	NA	0.284819
Heart	Myof	2.41404	NA	NA	NA	NA	NA	NA	NA	1	NA	NA	NA	NA	NA	NA	NA	0.000201903	NA	NA	NA	NA	NA	NA	NA	NA	NA	NA	NA	NA	NA	NA	0.284808
Heart	Herpud1	-34.651	NA	NA	NA	NA	NA	NA	NA	-1	NA	NA	NA	NA	NA	NA	NA	7.69825e-05	NA	NA	NA	NA	NA	NA	NA	NA	NA	NA	NA	NA	NA	NA	0.284677
Heart	Paqr4	-3.7364	NA	NA	NA	NA	NA	NA	NA	-1	NA	NA	NA	NA	NA	NA	NA	0.00406763	NA	NA	NA	NA	NA	NA	NA	NA	NA	NA	NA	NA	NA	NA	0.284435
Heart	2210016F16Rik	-3.97668	NA	NA	NA	NA	NA	NA	NA	-1	NA	NA	NA	NA	NA	NA	NA	0.000148461	NA	NA	NA	NA	NA	NA	NA	NA	NA	NA	NA	NA	NA	NA	0.284408
Heart	Hs3st1	66.126	-3.1037	10.37	-10.354	NA	NA	NA	NA	0	-1	0	0	NA	NA	NA	NA	0.391961	0.0820016	0.482717	0.118198	NA	NA	NA	NA	3.42416	19.0635	23.976	NA	NA	NA	NA	0.284147
Heart	Arc	2.88761	NA	NA	NA	NA	NA	NA	NA	1	NA	NA	NA	NA	NA	NA	NA	9.45698e-05	NA	NA	NA	NA	NA	NA	NA	NA	NA	NA	NA	NA	NA	NA	0.283988
Heart	Vmn2r5	-0.41819	2.1756	NA	NA	NA	NA	NA	NA	0	1	NA	NA	NA	NA	NA	NA	0.23533	0.089687	NA	NA	NA	NA	NA	NA	17.5419	NA	NA	NA	NA	NA	NA	0.283606
Heart	Ccl8	2.06882	NA	NA	NA	NA	NA	NA	NA	1	NA	NA	NA	NA	NA	NA	NA	9.59486e-05	NA	NA	NA	NA	NA	NA	NA	NA	NA	NA	NA	NA	NA	NA	0.283308
Heart	Pdia3	-19.3374	NA	NA	NA	NA	NA	NA	NA	-1	NA	NA	NA	NA	NA	NA	NA	0.000204983	NA	NA	NA	NA	NA	NA	NA	NA	NA	NA	NA	NA	NA	NA	0.282942
Heart	Cyp2a22	-0.20291	1.9018	NA	NA	NA	NA	NA	NA	0	1	NA	NA	NA	NA	NA	NA	0.252245	0.0995908	NA	NA	NA	NA	NA	NA	19.4053	NA	NA	NA	NA	NA	NA	0.28276
Heart	A930014E10Rik	0.158611	NA	NA	NA	NA	NA	NA	NA	1	NA	NA	NA	NA	NA	NA	NA	0.0196441	NA	NA	NA	NA	NA	NA	NA	NA	NA	NA	NA	NA	NA	NA	0.282733
Heart	Tgfbi	5.69664	NA	NA	NA	NA	NA	NA	NA	1	NA	NA	NA	NA	NA	NA	NA	0.000180709	NA	NA	NA	NA	NA	NA	NA	NA	NA	NA	NA	NA	NA	NA	0.282637
Heart	Gm20617	0.217933	NA	NA	NA	NA	NA	NA	NA	1	NA	NA	NA	NA	NA	NA	NA	0.00343373	NA	NA	NA	NA	NA	NA	NA	NA	NA	NA	NA	NA	NA	NA	0.282534
Heart	Fgl1	0.70518	NA	NA	NA	NA	NA	NA	NA	1	NA	NA	NA	NA	NA	NA	NA	0.000167127	NA	NA	NA	NA	NA	NA	NA	NA	NA	NA	NA	NA	NA	NA	0.282444
Heart	Corin	-36.0226	NA	NA	NA	NA	NA	NA	NA	-1	NA	NA	NA	NA	NA	NA	NA	0.000201129	NA	NA	NA	NA	NA	NA	NA	NA	NA	NA	NA	NA	NA	NA	0.28238
Heart	Olfr271-ps1	-0.258	0.94797	NA	NA	NA	NA	NA	NA	0	1	NA	NA	NA	NA	NA	NA	0.177906	0.0873603	NA	NA	NA	NA	NA	NA	17.1856	NA	NA	NA	NA	NA	NA	0.28224
Heart	Klrb1	0.4629	NA	NA	NA	NA	NA	NA	NA	1	NA	NA	NA	NA	NA	NA	NA	0.000229803	NA	NA	NA	NA	NA	NA	NA	NA	NA	NA	NA	NA	NA	NA	0.282179
Heart	Cntln	-1.5281	3.8736	NA	NA	NA	NA	NA	NA	0	1	NA	NA	NA	NA	NA	NA	0.142392	0.0964311	NA	NA	NA	NA	NA	NA	16.2174	NA	NA	NA	NA	NA	NA	0.281935
Heart	Ppif	-21.8576	NA	NA	NA	NA	NA	NA	NA	-1	NA	NA	NA	NA	NA	NA	NA	0.000995223	NA	NA	NA	NA	NA	NA	NA	NA	NA	NA	NA	NA	NA	NA	0.281718
Heart	H2-DMb1	1.80622	NA	NA	NA	NA	NA	NA	NA	1	NA	NA	NA	NA	NA	NA	NA	7.69449e-05	NA	NA	NA	NA	NA	NA	NA	NA	NA	NA	NA	NA	NA	NA	0.281552
Heart	Rtp4	-2.1402	4.3855	NA	NA	NA	NA	NA	NA	0	1	NA	NA	NA	NA	NA	NA	0.187324	0.087372	NA	NA	NA	NA	NA	NA	14.9693	NA	NA	NA	NA	NA	NA	0.281452
Heart	Zdhhc15	0.64567	NA	NA	NA	NA	NA	NA	NA	1	NA	NA	NA	NA	NA	NA	NA	0.0456954	NA	NA	NA	NA	NA	NA	NA	NA	NA	NA	NA	NA	NA	NA	0.28142
Heart	Gm37598	0.82322	-114.61	NA	NA	NA	NA	NA	NA	1	0	NA	NA	NA	NA	NA	NA	0.0737829	0.317628	NA	NA	NA	NA	NA	NA	26.8331	NA	NA	NA	NA	NA	NA	0.281159
Heart	Amtn	-624.26	0.56243	NA	NA	NA	NA	NA	NA	0	1	NA	NA	NA	NA	NA	NA	0.198991	0.0813639	NA	NA	NA	NA	NA	NA	3.03549	NA	NA	NA	NA	NA	NA	0.281159
Heart	Rab2a	-14.2577	NA	NA	NA	NA	NA	NA	NA	-1	NA	NA	NA	NA	NA	NA	NA	0.000190239	NA	NA	NA	NA	NA	NA	NA	NA	NA	NA	NA	NA	NA	NA	0.280924
Heart	Zmat4	1.14564	NA	NA	NA	NA	NA	NA	NA	1	NA	NA	NA	NA	NA	NA	NA	0.00045062	NA	NA	NA	NA	NA	NA	NA	NA	NA	NA	NA	NA	NA	NA	0.28024
Heart	Gabrq	0.541209	NA	NA	NA	NA	NA	NA	NA	1	NA	NA	NA	NA	NA	NA	NA	0.0396102	NA	NA	NA	NA	NA	NA	NA	NA	NA	NA	NA	NA	NA	NA	0.280206
Heart	Gm27252	-0.799586	NA	NA	NA	NA	NA	NA	NA	-1	NA	NA	NA	NA	NA	NA	NA	0.00158526	NA	NA	NA	NA	NA	NA	NA	NA	NA	NA	NA	NA	NA	NA	0.280192
Heart	Arhgap10	-2.88586	NA	NA	NA	NA	NA	NA	NA	-1	NA	NA	NA	NA	NA	NA	NA	0.000631298	NA	NA	NA	NA	NA	NA	NA	NA	NA	NA	NA	NA	NA	NA	0.280107
Heart	Ms4a4c	-0.12443	1.5408	NA	NA	NA	NA	NA	NA	0	1	NA	NA	NA	NA	NA	NA	0.362911	0.0898892	NA	NA	NA	NA	NA	NA	17.9916	NA	NA	NA	NA	NA	NA	0.280069
Heart	Slc25a11	-56.032	NA	NA	NA	NA	NA	NA	NA	-1	NA	NA	NA	NA	NA	NA	NA	0.000970602	NA	NA	NA	NA	NA	NA	NA	NA	NA	NA	NA	NA	NA	NA	0.279978
Heart	Gm6771	-0.14719	0.71018	NA	NA	NA	NA	NA	NA	0	1	NA	NA	NA	NA	NA	NA	0.205089	0.091015	NA	NA	NA	NA	NA	NA	17.9631	NA	NA	NA	NA	NA	NA	0.279847
Heart	Trmt10c	-2.50378	NA	NA	NA	NA	NA	NA	NA	-1	NA	NA	NA	NA	NA	NA	NA	0.000525211	NA	NA	NA	NA	NA	NA	NA	NA	NA	NA	NA	NA	NA	NA	0.279372
Heart	Lman2	-12.1014	NA	NA	NA	NA	NA	NA	NA	-1	NA	NA	NA	NA	NA	NA	NA	0.000124728	NA	NA	NA	NA	NA	NA	NA	NA	NA	NA	NA	NA	NA	NA	0.27924
Heart	Cd226	0.630092	NA	NA	NA	NA	NA	NA	NA	1	NA	NA	NA	NA	NA	NA	NA	0.00444698	NA	NA	NA	NA	NA	NA	NA	NA	NA	NA	NA	NA	NA	NA	0.279222
Heart	Sgta	-8.46527	NA	NA	NA	NA	NA	NA	NA	-1	NA	NA	NA	NA	NA	NA	NA	0.00462245	NA	NA	NA	NA	NA	NA	NA	NA	NA	NA	NA	NA	NA	NA	0.279167
Heart	Edn3	2.69732	NA	NA	NA	NA	NA	NA	NA	1	NA	NA	NA	NA	NA	NA	NA	0.000102608	NA	NA	NA	NA	NA	NA	NA	NA	NA	NA	NA	NA	NA	NA	0.279127
Heart	Prox2	-1.9417	160.49	-1.1907	NA	NA	NA	NA	NA	0	0	-1	NA	NA	NA	NA	NA	0.234279	0.192446	0.0819149	NA	NA	NA	NA	NA	8.96275	9.10835	NA	NA	NA	NA	NA	0.279094
Heart	Acads	9.04	-73.231	NA	NA	NA	NA	NA	NA	0	-1	NA	NA	NA	NA	NA	NA	0.320855	0.0994944	NA	NA	NA	NA	NA	NA	17.5839	NA	NA	NA	NA	NA	NA	0.278973
Heart	Zfp953	-146.11	0.80302	NA	NA	NA	NA	NA	NA	0	1	NA	NA	NA	NA	NA	NA	0.184833	0.0730345	NA	NA	NA	NA	NA	NA	3.07779	NA	NA	NA	NA	NA	NA	0.278934
Heart	Nphp3	1.53167	NA	NA	NA	NA	NA	NA	NA	1	NA	NA	NA	NA	NA	NA	NA	0.000565378	NA	NA	NA	NA	NA	NA	NA	NA	NA	NA	NA	NA	NA	NA	0.278861
Heart	Gm6325	0.492033	NA	NA	NA	NA	NA	NA	NA	1	NA	NA	NA	NA	NA	NA	NA	0.0373135	NA	NA	NA	NA	NA	NA	NA	NA	NA	NA	NA	NA	NA	NA	0.278694
Heart	Snx18	-3.52909	NA	NA	NA	NA	NA	NA	NA	-1	NA	NA	NA	NA	NA	NA	NA	0.0022156	NA	NA	NA	NA	NA	NA	NA	NA	NA	NA	NA	NA	NA	NA	0.278682
Heart	1700006A11Rik	-177.17	0.84182	NA	NA	NA	NA	NA	NA	0	1	NA	NA	NA	NA	NA	NA	0.169992	0.0760231	NA	NA	NA	NA	NA	NA	3.09196	NA	NA	NA	NA	NA	NA	0.278621
Heart	Map10	-2.13309	NA	NA	NA	NA	NA	NA	NA	-1	NA	NA	NA	NA	NA	NA	NA	9.17313e-05	NA	NA	NA	NA	NA	NA	NA	NA	NA	NA	NA	NA	NA	NA	0.278607
Heart	Ppp1ca	-14.7607	NA	NA	NA	NA	NA	NA	NA	-1	NA	NA	NA	NA	NA	NA	NA	0.000124399	NA	NA	NA	NA	NA	NA	NA	NA	NA	NA	NA	NA	NA	NA	0.278557
Heart	Dus3l	-3.15887	NA	NA	NA	NA	NA	NA	NA	-1	NA	NA	NA	NA	NA	NA	NA	0.0002281	NA	NA	NA	NA	NA	NA	NA	NA	NA	NA	NA	NA	NA	NA	0.278447
Heart	Dmac2	-5.7433	NA	NA	NA	NA	NA	NA	NA	-1	NA	NA	NA	NA	NA	NA	NA	0.000108611	NA	NA	NA	NA	NA	NA	NA	NA	NA	NA	NA	NA	NA	NA	0.278261
Heart	Asb8	-8.71087	NA	NA	NA	NA	NA	NA	NA	-1	NA	NA	NA	NA	NA	NA	NA	0.0016538	NA	NA	NA	NA	NA	NA	NA	NA	NA	NA	NA	NA	NA	NA	0.278194
Heart	U2surp	-4.6343	9.6697	NA	NA	NA	NA	NA	NA	0	1	NA	NA	NA	NA	NA	NA	0.173641	0.0899337	NA	NA	NA	NA	NA	NA	15.0229	NA	NA	NA	NA	NA	NA	0.278104
Heart	Klhl13	-3.36062	NA	NA	NA	NA	NA	NA	NA	-1	NA	NA	NA	NA	NA	NA	NA	0.00163316	NA	NA	NA	NA	NA	NA	NA	NA	NA	NA	NA	NA	NA	NA	0.277963
Heart	Atp5a1	-270.132	NA	NA	NA	NA	NA	NA	NA	-1	NA	NA	NA	NA	NA	NA	NA	0.000135389	NA	NA	NA	NA	NA	NA	NA	NA	NA	NA	NA	NA	NA	NA	0.277909
Heart	Eef1akmt1	-3.26979	NA	NA	NA	NA	NA	NA	NA	-1	NA	NA	NA	NA	NA	NA	NA	0.000125407	NA	NA	NA	NA	NA	NA	NA	NA	NA	NA	NA	NA	NA	NA	0.277692
Heart	Bag1	-13.5195	NA	NA	NA	NA	NA	NA	NA	-1	NA	NA	NA	NA	NA	NA	NA	9.41593e-05	NA	NA	NA	NA	NA	NA	NA	NA	NA	NA	NA	NA	NA	NA	0.277573
Heart	Aifm1	-8.037	NA	NA	NA	NA	NA	NA	NA	-1	NA	NA	NA	NA	NA	NA	NA	9.2485e-05	NA	NA	NA	NA	NA	NA	NA	NA	NA	NA	NA	NA	NA	NA	0.277379
Heart	Chst4	-0.878903	NA	NA	NA	NA	NA	NA	NA	-1	NA	NA	NA	NA	NA	NA	NA	0.000222404	NA	NA	NA	NA	NA	NA	NA	NA	NA	NA	NA	NA	NA	NA	0.27708
Heart	Gm4929	-0.016926	0.72316	NA	NA	NA	NA	NA	NA	0	1	NA	NA	NA	NA	NA	NA	0.461172	0.0970382	NA	NA	NA	NA	NA	NA	17.9535	NA	NA	NA	NA	NA	NA	0.277073
Heart	Ildr2	-0.83285	1.8507	NA	NA	NA	NA	NA	NA	0	1	NA	NA	NA	NA	NA	NA	0.231875	0.0929087	NA	NA	NA	NA	NA	NA	14.9435	NA	NA	NA	NA	NA	NA	0.277037
Heart	Lrtm1	32.499	-42.528	NA	NA	NA	NA	NA	NA	1	0	NA	NA	NA	NA	NA	NA	0.0965871	0.119575	NA	NA	NA	NA	NA	NA	15.7771	NA	NA	NA	NA	NA	NA	0.276974
Heart	Tmem82	-5.65261	NA	NA	NA	NA	NA	NA	NA	-1	NA	NA	NA	NA	NA	NA	NA	9.5715e-05	NA	NA	NA	NA	NA	NA	NA	NA	NA	NA	NA	NA	NA	NA	0.27697
Heart	Mrpl3	-7.25981	NA	NA	NA	NA	NA	NA	NA	-1	NA	NA	NA	NA	NA	NA	NA	0.00047888	NA	NA	NA	NA	NA	NA	NA	NA	NA	NA	NA	NA	NA	NA	0.276865
Heart	Pex19	-11.7748	NA	NA	NA	NA	NA	NA	NA	-1	NA	NA	NA	NA	NA	NA	NA	0.00327298	NA	NA	NA	NA	NA	NA	NA	NA	NA	NA	NA	NA	NA	NA	0.276813
Heart	Lmcd1	-7.61183	NA	NA	NA	NA	NA	NA	NA	-1	NA	NA	NA	NA	NA	NA	NA	0.000166442	NA	NA	NA	NA	NA	NA	NA	NA	NA	NA	NA	NA	NA	NA	0.276762
Heart	Mrrf	-3.87922	NA	NA	NA	NA	NA	NA	NA	-1	NA	NA	NA	NA	NA	NA	NA	8.89785e-05	NA	NA	NA	NA	NA	NA	NA	NA	NA	NA	NA	NA	NA	NA	0.276702
Heart	Olfr1193	0.446724	NA	NA	NA	NA	NA	NA	NA	1	NA	NA	NA	NA	NA	NA	NA	0.000140919	NA	NA	NA	NA	NA	NA	NA	NA	NA	NA	NA	NA	NA	NA	0.276635
Heart	Ptgs2	1.39181	NA	NA	NA	NA	NA	NA	NA	1	NA	NA	NA	NA	NA	NA	NA	0.000104336	NA	NA	NA	NA	NA	NA	NA	NA	NA	NA	NA	NA	NA	NA	0.276284
Heart	Ncln	-10.4296	NA	NA	NA	NA	NA	NA	NA	-1	NA	NA	NA	NA	NA	NA	NA	9.15679e-05	NA	NA	NA	NA	NA	NA	NA	NA	NA	NA	NA	NA	NA	NA	0.276167
Heart	Gm19589	-87.646	0.47376	NA	NA	NA	NA	NA	NA	0	1	NA	NA	NA	NA	NA	NA	0.204779	0.0843442	NA	NA	NA	NA	NA	NA	3.10888	NA	NA	NA	NA	NA	NA	0.275853
Heart	Cct5	-9.32487	NA	NA	NA	NA	NA	NA	NA	-1	NA	NA	NA	NA	NA	NA	NA	0.000132418	NA	NA	NA	NA	NA	NA	NA	NA	NA	NA	NA	NA	NA	NA	0.275613
Heart	Olfr465-ps1	-0.51298	1.5998	NA	NA	NA	NA	NA	NA	0	1	NA	NA	NA	NA	NA	NA	0.262534	0.0808663	NA	NA	NA	NA	NA	NA	14.655	NA	NA	NA	NA	NA	NA	0.275361
Heart	Gm38376	0.517691	NA	NA	NA	NA	NA	NA	NA	1	NA	NA	NA	NA	NA	NA	NA	0.000128807	NA	NA	NA	NA	NA	NA	NA	NA	NA	NA	NA	NA	NA	NA	0.275324
Heart	Pamr1	2.05136	NA	NA	NA	NA	NA	NA	NA	1	NA	NA	NA	NA	NA	NA	NA	9.53997e-05	NA	NA	NA	NA	NA	NA	NA	NA	NA	NA	NA	NA	NA	NA	0.275189
Heart	Ahsa1	-11.7648	NA	NA	NA	NA	NA	NA	NA	-1	NA	NA	NA	NA	NA	NA	NA	9.81307e-05	NA	NA	NA	NA	NA	NA	NA	NA	NA	NA	NA	NA	NA	NA	0.275117
Heart	Gm14033	-0.40825	1.3505	NA	NA	NA	NA	NA	NA	0	1	NA	NA	NA	NA	NA	NA	0.289627	0.0901246	NA	NA	NA	NA	NA	NA	13.8248	NA	NA	NA	NA	NA	NA	0.274709
Heart	Agpat2	-6.39476	NA	NA	NA	NA	NA	NA	NA	-1	NA	NA	NA	NA	NA	NA	NA	0.00129887	NA	NA	NA	NA	NA	NA	NA	NA	NA	NA	NA	NA	NA	NA	0.274697
Heart	Rnf114	-11.2225	NA	NA	NA	NA	NA	NA	NA	-1	NA	NA	NA	NA	NA	NA	NA	0.000106487	NA	NA	NA	NA	NA	NA	NA	NA	NA	NA	NA	NA	NA	NA	0.274581
Heart	Mospd1	-5.35514	NA	NA	NA	NA	NA	NA	NA	-1	NA	NA	NA	NA	NA	NA	NA	9.50693e-05	NA	NA	NA	NA	NA	NA	NA	NA	NA	NA	NA	NA	NA	NA	0.27439
Heart	Gpr18	-0.052782	1.6139	NA	NA	NA	NA	NA	NA	0	1	NA	NA	NA	NA	NA	NA	0.401162	0.0941394	NA	NA	NA	NA	NA	NA	20.3403	NA	NA	NA	NA	NA	NA	0.274233
Heart	Idua	-4.79552	NA	NA	NA	NA	NA	NA	NA	-1	NA	NA	NA	NA	NA	NA	NA	0.000101399	NA	NA	NA	NA	NA	NA	NA	NA	NA	NA	NA	NA	NA	NA	0.274163
Heart	Arl8b	13.969	-13.891	NA	NA	NA	NA	NA	NA	0	-1	NA	NA	NA	NA	NA	NA	0.126638	0.0975107	NA	NA	NA	NA	NA	NA	12.052	NA	NA	NA	NA	NA	NA	0.274094
Heart	Gpr180	-3.69968	NA	NA	NA	NA	NA	NA	NA	-1	NA	NA	NA	NA	NA	NA	NA	0.000106702	NA	NA	NA	NA	NA	NA	NA	NA	NA	NA	NA	NA	NA	NA	0.273967
Heart	Sh2b1	-5.95548	NA	NA	NA	NA	NA	NA	NA	-1	NA	NA	NA	NA	NA	NA	NA	0.000256662	NA	NA	NA	NA	NA	NA	NA	NA	NA	NA	NA	NA	NA	NA	0.273858
Heart	D130017N08Rik	0.694265	NA	NA	NA	NA	NA	NA	NA	1	NA	NA	NA	NA	NA	NA	NA	0.00754304	NA	NA	NA	NA	NA	NA	NA	NA	NA	NA	NA	NA	NA	NA	0.273828
Heart	Ubash3b	-1.0396	3.4682	NA	NA	NA	NA	NA	NA	0	1	NA	NA	NA	NA	NA	NA	0.274623	0.0913479	NA	NA	NA	NA	NA	NA	14.9433	NA	NA	NA	NA	NA	NA	0.27382
Heart	Preb	-5.9672	NA	NA	NA	NA	NA	NA	NA	-1	NA	NA	NA	NA	NA	NA	NA	9.59504e-05	NA	NA	NA	NA	NA	NA	NA	NA	NA	NA	NA	NA	NA	NA	0.273811
Heart	Ubl4a	17.624	-17.908	NA	NA	NA	NA	NA	NA	0	-1	NA	NA	NA	NA	NA	NA	0.204322	0.0850418	NA	NA	NA	NA	NA	NA	10.3475	NA	NA	NA	NA	NA	NA	0.273761
Heart	Rnf213	4.87974	NA	NA	NA	NA	NA	NA	NA	1	NA	NA	NA	NA	NA	NA	NA	9.93654e-05	NA	NA	NA	NA	NA	NA	NA	NA	NA	NA	NA	NA	NA	NA	0.273521
Heart	Noa1	-3.26551	NA	NA	NA	NA	NA	NA	NA	-1	NA	NA	NA	NA	NA	NA	NA	9.68911e-05	NA	NA	NA	NA	NA	NA	NA	NA	NA	NA	NA	NA	NA	NA	0.273496
Heart	Mtch2	-11.5177	NA	NA	NA	NA	NA	NA	NA	-1	NA	NA	NA	NA	NA	NA	NA	0.000353199	NA	NA	NA	NA	NA	NA	NA	NA	NA	NA	NA	NA	NA	NA	0.273454
Heart	Prl3c1	0.399898	NA	NA	NA	NA	NA	NA	NA	1	NA	NA	NA	NA	NA	NA	NA	0.000152252	NA	NA	NA	NA	NA	NA	NA	NA	NA	NA	NA	NA	NA	NA	0.273353
Heart	1700030E10Rik	0.272872	NA	NA	NA	NA	NA	NA	NA	1	NA	NA	NA	NA	NA	NA	NA	0.000166272	NA	NA	NA	NA	NA	NA	NA	NA	NA	NA	NA	NA	NA	NA	0.273268
Heart	Mrpl37	-11.2129	NA	NA	NA	NA	NA	NA	NA	-1	NA	NA	NA	NA	NA	NA	NA	0.000116073	NA	NA	NA	NA	NA	NA	NA	NA	NA	NA	NA	NA	NA	NA	0.273012
Heart	Atp1b1	-15.957	NA	NA	NA	NA	NA	NA	NA	-1	NA	NA	NA	NA	NA	NA	NA	0.000676921	NA	NA	NA	NA	NA	NA	NA	NA	NA	NA	NA	NA	NA	NA	0.272942
Heart	Capzb	-17.6401	NA	NA	NA	NA	NA	NA	NA	-1	NA	NA	NA	NA	NA	NA	NA	0.000533881	NA	NA	NA	NA	NA	NA	NA	NA	NA	NA	NA	NA	NA	NA	0.272619
Heart	Gpnmb	1.4501	NA	NA	NA	NA	NA	NA	NA	1	NA	NA	NA	NA	NA	NA	NA	0.000127813	NA	NA	NA	NA	NA	NA	NA	NA	NA	NA	NA	NA	NA	NA	0.272553
Heart	Gm28649	0.156466	NA	NA	NA	NA	NA	NA	NA	1	NA	NA	NA	NA	NA	NA	NA	0.0245499	NA	NA	NA	NA	NA	NA	NA	NA	NA	NA	NA	NA	NA	NA	0.272527
Heart	Gm6377	0.398953	NA	NA	NA	NA	NA	NA	NA	1	NA	NA	NA	NA	NA	NA	NA	0.00943274	NA	NA	NA	NA	NA	NA	NA	NA	NA	NA	NA	NA	NA	NA	0.272401
Heart	Acaa2	-127.603	NA	NA	NA	NA	NA	NA	NA	-1	NA	NA	NA	NA	NA	NA	NA	0.000824371	NA	NA	NA	NA	NA	NA	NA	NA	NA	NA	NA	NA	NA	NA	0.272316
Heart	Sytl4	0.714112	NA	NA	NA	NA	NA	NA	NA	1	NA	NA	NA	NA	NA	NA	NA	0.0101884	NA	NA	NA	NA	NA	NA	NA	NA	NA	NA	NA	NA	NA	NA	0.272241
Heart	Gm5934	0.14475	NA	NA	NA	NA	NA	NA	NA	1	NA	NA	NA	NA	NA	NA	NA	0.0627727	NA	NA	NA	NA	NA	NA	NA	NA	NA	NA	NA	NA	NA	NA	0.272179
Heart	Hibadh	23.566	-52.168	NA	NA	NA	NA	NA	NA	0	-1	NA	NA	NA	NA	NA	NA	0.235866	0.0954882	NA	NA	NA	NA	NA	NA	13.0417	NA	NA	NA	NA	NA	NA	0.272166
Heart	Urod	-5.15169	NA	NA	NA	NA	NA	NA	NA	-1	NA	NA	NA	NA	NA	NA	NA	0.000192597	NA	NA	NA	NA	NA	NA	NA	NA	NA	NA	NA	NA	NA	NA	0.272059
Heart	Gm48691	-190.06	0.55858	NA	NA	NA	NA	NA	NA	0	1	NA	NA	NA	NA	NA	NA	0.14731	0.0920157	NA	NA	NA	NA	NA	NA	3.07912	NA	NA	NA	NA	NA	NA	0.272056
Heart	Lgi2	1.01573	NA	NA	NA	NA	NA	NA	NA	1	NA	NA	NA	NA	NA	NA	NA	0.000123557	NA	NA	NA	NA	NA	NA	NA	NA	NA	NA	NA	NA	NA	NA	0.271877
Heart	Olfr630	-97.789	0.39697	NA	NA	NA	NA	NA	NA	0	1	NA	NA	NA	NA	NA	NA	0.158042	0.0812947	NA	NA	NA	NA	NA	NA	3.08586	NA	NA	NA	NA	NA	NA	0.271865
Heart	Mdh1	-158.826	NA	NA	NA	NA	NA	NA	NA	-1	NA	NA	NA	NA	NA	NA	NA	0.000105642	NA	NA	NA	NA	NA	NA	NA	NA	NA	NA	NA	NA	NA	NA	0.271811
Heart	Afg3l2	-11.7034	NA	NA	NA	NA	NA	NA	NA	-1	NA	NA	NA	NA	NA	NA	NA	0.00409226	NA	NA	NA	NA	NA	NA	NA	NA	NA	NA	NA	NA	NA	NA	0.2717
Heart	Tmem50b	-7.92466	NA	NA	NA	NA	NA	NA	NA	-1	NA	NA	NA	NA	NA	NA	NA	0.000102752	NA	NA	NA	NA	NA	NA	NA	NA	NA	NA	NA	NA	NA	NA	0.271543
Heart	Ms4a4b	0.971416	NA	NA	NA	NA	NA	NA	NA	1	NA	NA	NA	NA	NA	NA	NA	0.000142998	NA	NA	NA	NA	NA	NA	NA	NA	NA	NA	NA	NA	NA	NA	0.271483
Heart	Hspa5	-98.8535	NA	NA	NA	NA	NA	NA	NA	-1	NA	NA	NA	NA	NA	NA	NA	0.000446486	NA	NA	NA	NA	NA	NA	NA	NA	NA	NA	NA	NA	NA	NA	0.271419
Heart	Tppp3	-3.91391	NA	NA	NA	NA	NA	NA	NA	-1	NA	NA	NA	NA	NA	NA	NA	0.000885606	NA	NA	NA	NA	NA	NA	NA	NA	NA	NA	NA	NA	NA	NA	0.271392
Heart	Gm6586	0.363894	NA	NA	NA	NA	NA	NA	NA	1	NA	NA	NA	NA	NA	NA	NA	0.000311189	NA	NA	NA	NA	NA	NA	NA	NA	NA	NA	NA	NA	NA	NA	0.271222
Heart	Olfr1499	-0.29373	0.96718	NA	NA	NA	NA	NA	NA	0	1	NA	NA	NA	NA	NA	NA	0.288389	0.0895003	NA	NA	NA	NA	NA	NA	13.8455	NA	NA	NA	NA	NA	NA	0.271119
Heart	Gm45788	-0.99707	0.4337	NA	NA	NA	NA	NA	NA	0	1	NA	NA	NA	NA	NA	NA	0.21108	0.0769515	NA	NA	NA	NA	NA	NA	7.46368	NA	NA	NA	NA	NA	NA	0.27088
Heart	Snx21	-3.2392	NA	NA	NA	NA	NA	NA	NA	-1	NA	NA	NA	NA	NA	NA	NA	0.0002737	NA	NA	NA	NA	NA	NA	NA	NA	NA	NA	NA	NA	NA	NA	0.270876
Heart	Rxrg	-7.00363	NA	NA	NA	NA	NA	NA	NA	-1	NA	NA	NA	NA	NA	NA	NA	0.000211129	NA	NA	NA	NA	NA	NA	NA	NA	NA	NA	NA	NA	NA	NA	0.270826
Heart	Pak3	1.01136	NA	NA	NA	NA	NA	NA	NA	1	NA	NA	NA	NA	NA	NA	NA	0.0154386	NA	NA	NA	NA	NA	NA	NA	NA	NA	NA	NA	NA	NA	NA	0.270687
Heart	Vmn2r124	1.8254	NA	NA	NA	NA	NA	NA	NA	1	NA	NA	NA	NA	NA	NA	NA	0.000105751	NA	NA	NA	NA	NA	NA	NA	NA	NA	NA	NA	NA	NA	NA	0.270662
Heart	Rxrb	-6.39437	NA	NA	NA	NA	NA	NA	NA	-1	NA	NA	NA	NA	NA	NA	NA	0.00010632	NA	NA	NA	NA	NA	NA	NA	NA	NA	NA	NA	NA	NA	NA	0.270599
Heart	Ppp5c	-6.9794	NA	NA	NA	NA	NA	NA	NA	-1	NA	NA	NA	NA	NA	NA	NA	0.000174521	NA	NA	NA	NA	NA	NA	NA	NA	NA	NA	NA	NA	NA	NA	0.270471
Heart	Dock2	3.01532	NA	NA	NA	NA	NA	NA	NA	1	NA	NA	NA	NA	NA	NA	NA	0.00012963	NA	NA	NA	NA	NA	NA	NA	NA	NA	NA	NA	NA	NA	NA	0.270343
Heart	Ostc	-3.59445	NA	NA	NA	NA	NA	NA	NA	-1	NA	NA	NA	NA	NA	NA	NA	0.000114107	NA	NA	NA	NA	NA	NA	NA	NA	NA	NA	NA	NA	NA	NA	0.270319
Heart	Timm50	-7.3621	NA	NA	NA	NA	NA	NA	NA	-1	NA	NA	NA	NA	NA	NA	NA	0.000307065	NA	NA	NA	NA	NA	NA	NA	NA	NA	NA	NA	NA	NA	NA	0.270289
Heart	Coasy	269.82	-3.0142	NA	NA	NA	NA	NA	NA	0	-1	NA	NA	NA	NA	NA	NA	0.408375	0.0728849	NA	NA	NA	NA	NA	NA	3.15905	NA	NA	NA	NA	NA	NA	0.270222
Heart	Gm21874	0.149301	NA	NA	NA	NA	NA	NA	NA	1	NA	NA	NA	NA	NA	NA	NA	0.0128561	NA	NA	NA	NA	NA	NA	NA	NA	NA	NA	NA	NA	NA	NA	0.270181
Heart	Uqcc1	-18.1514	NA	NA	NA	NA	NA	NA	NA	-1	NA	NA	NA	NA	NA	NA	NA	0.000820435	NA	NA	NA	NA	NA	NA	NA	NA	NA	NA	NA	NA	NA	NA	0.270171
Heart	Olfr195	-103.61	0.47413	NA	NA	NA	NA	NA	NA	0	1	NA	NA	NA	NA	NA	NA	0.151953	0.0781574	NA	NA	NA	NA	NA	NA	3.06647	NA	NA	NA	NA	NA	NA	0.270165
Heart	Gm9871	-0.09525	1.3037	NA	NA	NA	NA	NA	NA	0	1	NA	NA	NA	NA	NA	NA	0.370832	0.099024	NA	NA	NA	NA	NA	NA	17.9437	NA	NA	NA	NA	NA	NA	0.270138
Heart	Hdhd2	-4.85419	NA	NA	NA	NA	NA	NA	NA	-1	NA	NA	NA	NA	NA	NA	NA	0.000122945	NA	NA	NA	NA	NA	NA	NA	NA	NA	NA	NA	NA	NA	NA	0.269979
Heart	Aspa	1.28376	NA	NA	NA	NA	NA	NA	NA	1	NA	NA	NA	NA	NA	NA	NA	0.000122237	NA	NA	NA	NA	NA	NA	NA	NA	NA	NA	NA	NA	NA	NA	0.269957
Heart	Ube2n	-3.84083	NA	NA	NA	NA	NA	NA	NA	-1	NA	NA	NA	NA	NA	NA	NA	0.000813415	NA	NA	NA	NA	NA	NA	NA	NA	NA	NA	NA	NA	NA	NA	0.269933
Heart	Poldip2	-10.9013	NA	NA	NA	NA	NA	NA	NA	-1	NA	NA	NA	NA	NA	NA	NA	0.00235045	NA	NA	NA	NA	NA	NA	NA	NA	NA	NA	NA	NA	NA	NA	0.26992
Heart	Gm6230	-0.23439	0.64542	NA	NA	NA	NA	NA	NA	0	1	NA	NA	NA	NA	NA	NA	0.251876	0.0854295	NA	NA	NA	NA	NA	NA	14.1295	NA	NA	NA	NA	NA	NA	0.269907
Heart	Clec3b	-1.57664	NA	NA	NA	NA	NA	NA	NA	-1	NA	NA	NA	NA	NA	NA	NA	0.00811011	NA	NA	NA	NA	NA	NA	NA	NA	NA	NA	NA	NA	NA	NA	0.269789
Heart	Acer3	1.92042	NA	NA	NA	NA	NA	NA	NA	1	NA	NA	NA	NA	NA	NA	NA	0.00244824	NA	NA	NA	NA	NA	NA	NA	NA	NA	NA	NA	NA	NA	NA	0.269755
Heart	Idh3g	24.043	-121.11	NA	NA	NA	NA	NA	NA	0	-1	NA	NA	NA	NA	NA	NA	0.318493	0.0890904	NA	NA	NA	NA	NA	NA	15.0089	NA	NA	NA	NA	NA	NA	0.269725
Heart	2310040G24Rik	-1.37805	NA	NA	NA	NA	NA	NA	NA	-1	NA	NA	NA	NA	NA	NA	NA	0.000290035	NA	NA	NA	NA	NA	NA	NA	NA	NA	NA	NA	NA	NA	NA	0.269551
Heart	Msi1	0.317387	NA	NA	NA	NA	NA	NA	NA	1	NA	NA	NA	NA	NA	NA	NA	0.00681785	NA	NA	NA	NA	NA	NA	NA	NA	NA	NA	NA	NA	NA	NA	0.26955
Heart	Magt1	-5.95149	NA	NA	NA	NA	NA	NA	NA	-1	NA	NA	NA	NA	NA	NA	NA	0.000280055	NA	NA	NA	NA	NA	NA	NA	NA	NA	NA	NA	NA	NA	NA	0.26954
Heart	Ndufa9	-40.727	NA	NA	NA	NA	NA	NA	NA	-1	NA	NA	NA	NA	NA	NA	NA	0.00115538	NA	NA	NA	NA	NA	NA	NA	NA	NA	NA	NA	NA	NA	NA	0.269472
Heart	Adamtsl2	-4.2912	NA	NA	NA	NA	NA	NA	NA	-1	NA	NA	NA	NA	NA	NA	NA	0.00378499	NA	NA	NA	NA	NA	NA	NA	NA	NA	NA	NA	NA	NA	NA	0.269383
Heart	Itga4	1.7278	NA	NA	NA	NA	NA	NA	NA	1	NA	NA	NA	NA	NA	NA	NA	0.000535704	NA	NA	NA	NA	NA	NA	NA	NA	NA	NA	NA	NA	NA	NA	0.269114
Heart	Pgm2	-18.0891	NA	NA	NA	NA	NA	NA	NA	-1	NA	NA	NA	NA	NA	NA	NA	0.000648792	NA	NA	NA	NA	NA	NA	NA	NA	NA	NA	NA	NA	NA	NA	0.268536
Heart	Car14	-16.1479	NA	NA	NA	NA	NA	NA	NA	-1	NA	NA	NA	NA	NA	NA	NA	0.00129229	NA	NA	NA	NA	NA	NA	NA	NA	NA	NA	NA	NA	NA	NA	0.268447
Heart	Zdhhc19	-0.64318	0.56004	NA	NA	NA	NA	NA	NA	0	1	NA	NA	NA	NA	NA	NA	0.189344	0.0895862	NA	NA	NA	NA	NA	NA	9.53206	NA	NA	NA	NA	NA	NA	0.268156
Heart	Grb14	-14.6756	NA	NA	NA	NA	NA	NA	NA	-1	NA	NA	NA	NA	NA	NA	NA	0.011604	NA	NA	NA	NA	NA	NA	NA	NA	NA	NA	NA	NA	NA	NA	0.268124
Heart	Ndufs2	-88.5661	NA	NA	NA	NA	NA	NA	NA	-1	NA	NA	NA	NA	NA	NA	NA	0.000290197	NA	NA	NA	NA	NA	NA	NA	NA	NA	NA	NA	NA	NA	NA	0.268091
Heart	Ncoa7	1.52453	NA	NA	NA	NA	NA	NA	NA	1	NA	NA	NA	NA	NA	NA	NA	0.00146827	NA	NA	NA	NA	NA	NA	NA	NA	NA	NA	NA	NA	NA	NA	0.26788
Heart	Spn	0.545198	NA	NA	NA	NA	NA	NA	NA	1	NA	NA	NA	NA	NA	NA	NA	0.000118931	NA	NA	NA	NA	NA	NA	NA	NA	NA	NA	NA	NA	NA	NA	0.267876
Heart	Fbxo32	-10.114	NA	NA	NA	NA	NA	NA	NA	-1	NA	NA	NA	NA	NA	NA	NA	0.000910062	NA	NA	NA	NA	NA	NA	NA	NA	NA	NA	NA	NA	NA	NA	0.267756
Heart	Pef1	-3.21615	NA	NA	NA	NA	NA	NA	NA	-1	NA	NA	NA	NA	NA	NA	NA	0.000141854	NA	NA	NA	NA	NA	NA	NA	NA	NA	NA	NA	NA	NA	NA	0.267413
Heart	Vdac3	21.15	-46.189	NA	NA	NA	NA	NA	NA	0	-1	NA	NA	NA	NA	NA	NA	0.201314	0.0783252	NA	NA	NA	NA	NA	NA	14.9434	NA	NA	NA	NA	NA	NA	0.267221
Heart	9430053O09Rik	-43.66	0.57294	NA	NA	NA	NA	NA	NA	0	1	NA	NA	NA	NA	NA	NA	0.365889	0.0835803	NA	NA	NA	NA	NA	NA	3.33296	NA	NA	NA	NA	NA	NA	0.267174
Heart	Sec31a	-9.11774	NA	NA	NA	NA	NA	NA	NA	-1	NA	NA	NA	NA	NA	NA	NA	0.000665948	NA	NA	NA	NA	NA	NA	NA	NA	NA	NA	NA	NA	NA	NA	0.267129
Heart	Sf3b3	3.0259	-15.535	NA	NA	NA	NA	NA	NA	0	-1	NA	NA	NA	NA	NA	NA	0.345028	0.0854183	NA	NA	NA	NA	NA	NA	14.9344	NA	NA	NA	NA	NA	NA	0.266605
Heart	Pgap2	-7.21208	NA	NA	NA	NA	NA	NA	NA	-1	NA	NA	NA	NA	NA	NA	NA	0.00350594	NA	NA	NA	NA	NA	NA	NA	NA	NA	NA	NA	NA	NA	NA	0.266418
Heart	Pex11a	316.46	-3.4405	NA	NA	NA	NA	NA	NA	0	-1	NA	NA	NA	NA	NA	NA	0.317345	0.0864256	NA	NA	NA	NA	NA	NA	3.28219	NA	NA	NA	NA	NA	NA	0.266075
Heart	Smlr1	-0.46421	1.1564	NA	NA	NA	NA	NA	NA	0	1	NA	NA	NA	NA	NA	NA	0.237514	0.086004	NA	NA	NA	NA	NA	NA	14.0099	NA	NA	NA	NA	NA	NA	0.265986
Heart	Lair1	-0.52593	4.6706	NA	NA	NA	NA	NA	NA	0	1	NA	NA	NA	NA	NA	NA	0.327439	0.0953993	NA	NA	NA	NA	NA	NA	17.5089	NA	NA	NA	NA	NA	NA	0.265606
Heart	Mmp25	0.378432	NA	NA	NA	NA	NA	NA	NA	1	NA	NA	NA	NA	NA	NA	NA	0.000128979	NA	NA	NA	NA	NA	NA	NA	NA	NA	NA	NA	NA	NA	NA	0.265588
Heart	Gm45405	-0.38548	0.81841	NA	NA	NA	NA	NA	NA	0	1	NA	NA	NA	NA	NA	NA	0.115834	0.0916806	NA	NA	NA	NA	NA	NA	17.7032	NA	NA	NA	NA	NA	NA	0.265436
Heart	Pgam2	-40.53	NA	NA	NA	NA	NA	NA	NA	-1	NA	NA	NA	NA	NA	NA	NA	0.00440719	NA	NA	NA	NA	NA	NA	NA	NA	NA	NA	NA	NA	NA	NA	0.26531
Heart	Gm7040	-45.698	0.37891	NA	NA	NA	NA	NA	NA	0	1	NA	NA	NA	NA	NA	NA	0.248086	0.0729013	NA	NA	NA	NA	NA	NA	3.13843	NA	NA	NA	NA	NA	NA	0.265226
Heart	Elmod3	-3.27629	NA	NA	NA	NA	NA	NA	NA	-1	NA	NA	NA	NA	NA	NA	NA	0.000129257	NA	NA	NA	NA	NA	NA	NA	NA	NA	NA	NA	NA	NA	NA	0.265116
Heart	Tspan17	2.36626	NA	NA	NA	NA	NA	NA	NA	1	NA	NA	NA	NA	NA	NA	NA	0.00212427	NA	NA	NA	NA	NA	NA	NA	NA	NA	NA	NA	NA	NA	NA	0.26482
Heart	Zfp326	1.28001	NA	NA	NA	NA	NA	NA	NA	1	NA	NA	NA	NA	NA	NA	NA	0.000437255	NA	NA	NA	NA	NA	NA	NA	NA	NA	NA	NA	NA	NA	NA	0.264742
Heart	Flt3	-0.94107	1.3373	NA	NA	NA	NA	NA	NA	0	1	NA	NA	NA	NA	NA	NA	0.175562	0.0997388	NA	NA	NA	NA	NA	NA	12.7472	NA	NA	NA	NA	NA	NA	0.264701
Heart	Rab35	-2.7567	1299.5	NA	NA	NA	NA	NA	NA	-1	0	NA	NA	NA	NA	NA	NA	0.0789246	0.145275	NA	NA	NA	NA	NA	NA	26.9555	NA	NA	NA	NA	NA	NA	0.264684
Heart	Emb	1.70936	NA	NA	NA	NA	NA	NA	NA	1	NA	NA	NA	NA	NA	NA	NA	0.000204542	NA	NA	NA	NA	NA	NA	NA	NA	NA	NA	NA	NA	NA	NA	0.264598
Heart	Ap3d1	-7.54145	NA	NA	NA	NA	NA	NA	NA	-1	NA	NA	NA	NA	NA	NA	NA	0.0004018	NA	NA	NA	NA	NA	NA	NA	NA	NA	NA	NA	NA	NA	NA	0.26458
Heart	St13	29.272	-21.287	NA	NA	NA	NA	NA	NA	0	-1	NA	NA	NA	NA	NA	NA	0.152087	0.0824419	NA	NA	NA	NA	NA	NA	10.4807	NA	NA	NA	NA	NA	NA	0.264457
Heart	Olfr872	-2.5219	0.65742	NA	NA	NA	NA	NA	NA	0	1	NA	NA	NA	NA	NA	NA	0.145983	0.0811852	NA	NA	NA	NA	NA	NA	6.55569	NA	NA	NA	NA	NA	NA	0.264349
Heart	Pcca	1.3127	-21.585	NA	NA	NA	NA	NA	NA	0	-1	NA	NA	NA	NA	NA	NA	0.402303	0.0976818	NA	NA	NA	NA	NA	NA	17.947	NA	NA	NA	NA	NA	NA	0.264346
Heart	Gm7054	0.248714	NA	NA	NA	NA	NA	NA	NA	1	NA	NA	NA	NA	NA	NA	NA	0.000138657	NA	NA	NA	NA	NA	NA	NA	NA	NA	NA	NA	NA	NA	NA	0.26432
Heart	Slc26a10	11.7556	NA	NA	NA	NA	NA	NA	NA	1	NA	NA	NA	NA	NA	NA	NA	0.0001315	NA	NA	NA	NA	NA	NA	NA	NA	NA	NA	NA	NA	NA	NA	0.264133
Heart	Gm44030	0.236353	NA	NA	NA	NA	NA	NA	NA	1	NA	NA	NA	NA	NA	NA	NA	0.00019823	NA	NA	NA	NA	NA	NA	NA	NA	NA	NA	NA	NA	NA	NA	0.263906
Heart	Dnpep	-7.1781	NA	NA	NA	NA	NA	NA	NA	-1	NA	NA	NA	NA	NA	NA	NA	0.000930901	NA	NA	NA	NA	NA	NA	NA	NA	NA	NA	NA	NA	NA	NA	0.263774
Heart	Mdh2	-106.21	NA	NA	NA	NA	NA	NA	NA	-1	NA	NA	NA	NA	NA	NA	NA	0.000318934	NA	NA	NA	NA	NA	NA	NA	NA	NA	NA	NA	NA	NA	NA	0.263748
Heart	Abca12	3.6167	NA	NA	NA	NA	NA	NA	NA	1	NA	NA	NA	NA	NA	NA	NA	0.000165488	NA	NA	NA	NA	NA	NA	NA	NA	NA	NA	NA	NA	NA	NA	0.263722
Heart	Cadps2	1.73159	NA	NA	NA	NA	NA	NA	NA	1	NA	NA	NA	NA	NA	NA	NA	0.000676397	NA	NA	NA	NA	NA	NA	NA	NA	NA	NA	NA	NA	NA	NA	0.263673
Heart	D030056L22Rik	-1.79637	NA	NA	NA	NA	NA	NA	NA	-1	NA	NA	NA	NA	NA	NA	NA	0.000137783	NA	NA	NA	NA	NA	NA	NA	NA	NA	NA	NA	NA	NA	NA	0.263622
Heart	Mrpl11	-2.4964	NA	NA	NA	NA	NA	NA	NA	-1	NA	NA	NA	NA	NA	NA	NA	0.00172314	NA	NA	NA	NA	NA	NA	NA	NA	NA	NA	NA	NA	NA	NA	0.263575
Heart	Flywch1	57.864	-5.1332	NA	NA	NA	NA	NA	NA	0	-1	NA	NA	NA	NA	NA	NA	0.470331	0.0737443	NA	NA	NA	NA	NA	NA	4.51745	NA	NA	NA	NA	NA	NA	0.263441
Heart	Fahd1	-5.7536	NA	NA	NA	NA	NA	NA	NA	-1	NA	NA	NA	NA	NA	NA	NA	0.000290506	NA	NA	NA	NA	NA	NA	NA	NA	NA	NA	NA	NA	NA	NA	0.263393
Heart	Fgl2	-17.513	40.512	NA	NA	NA	NA	NA	NA	-1	0	NA	NA	NA	NA	NA	NA	0.0932021	0.118261	NA	NA	NA	NA	NA	NA	19.6689	NA	NA	NA	NA	NA	NA	0.263316
Heart	Olfr1300-ps1	0.356328	NA	NA	NA	NA	NA	NA	NA	1	NA	NA	NA	NA	NA	NA	NA	0.000237011	NA	NA	NA	NA	NA	NA	NA	NA	NA	NA	NA	NA	NA	NA	0.263264
Heart	Gm16299	2.6446	-2.355	NA	NA	NA	NA	NA	NA	1	0	NA	NA	NA	NA	NA	NA	0.0985135	0.102636	NA	NA	NA	NA	NA	NA	14.9437	NA	NA	NA	NA	NA	NA	0.263117
Heart	Gm43487	-3.1553	0.52158	NA	NA	NA	NA	NA	NA	0	1	NA	NA	NA	NA	NA	NA	0.116589	0.098181	NA	NA	NA	NA	NA	NA	6.39742	NA	NA	NA	NA	NA	NA	0.263042
Heart	Bsg	-177.201	NA	NA	NA	NA	NA	NA	NA	-1	NA	NA	NA	NA	NA	NA	NA	0.000142714	NA	NA	NA	NA	NA	NA	NA	NA	NA	NA	NA	NA	NA	NA	0.262885
Heart	Raver2	2.0705	-2.702	NA	NA	NA	NA	NA	NA	1	0	NA	NA	NA	NA	NA	NA	0.0920286	0.162868	NA	NA	NA	NA	NA	NA	18.0426	NA	NA	NA	NA	NA	NA	0.262849
Heart	Gm37236	0.134467	NA	NA	NA	NA	NA	NA	NA	1	NA	NA	NA	NA	NA	NA	NA	0.0523074	NA	NA	NA	NA	NA	NA	NA	NA	NA	NA	NA	NA	NA	NA	0.262812
Heart	Card11	0.718512	NA	NA	NA	NA	NA	NA	NA	1	NA	NA	NA	NA	NA	NA	NA	0.000305052	NA	NA	NA	NA	NA	NA	NA	NA	NA	NA	NA	NA	NA	NA	0.262736
Heart	Efcab2	23.037	-32.776	NA	NA	NA	NA	NA	NA	0	-1	NA	NA	NA	NA	NA	NA	0.125609	0.0846399	NA	NA	NA	NA	NA	NA	14.9442	NA	NA	NA	NA	NA	NA	0.262606
Heart	4930456G14Rik	-0.81124	0.72311	NA	NA	NA	NA	NA	NA	0	1	NA	NA	NA	NA	NA	NA	0.176449	0.080496	NA	NA	NA	NA	NA	NA	10.696	NA	NA	NA	NA	NA	NA	0.262463
Heart	Grap2	0.488045	NA	NA	NA	NA	NA	NA	NA	1	NA	NA	NA	NA	NA	NA	NA	0.000137006	NA	NA	NA	NA	NA	NA	NA	NA	NA	NA	NA	NA	NA	NA	0.262344
Heart	Tmem109	-17.6498	NA	NA	NA	NA	NA	NA	NA	-1	NA	NA	NA	NA	NA	NA	NA	0.000139238	NA	NA	NA	NA	NA	NA	NA	NA	NA	NA	NA	NA	NA	NA	0.262331
Heart	Clpb	9.0321	-20.027	NA	NA	NA	NA	NA	NA	0	-1	NA	NA	NA	NA	NA	NA	0.215075	0.0841025	NA	NA	NA	NA	NA	NA	14.9434	NA	NA	NA	NA	NA	NA	0.262269
Heart	Slc6a5	0.75655	NA	NA	NA	NA	NA	NA	NA	1	NA	NA	NA	NA	NA	NA	NA	0.000202879	NA	NA	NA	NA	NA	NA	NA	NA	NA	NA	NA	NA	NA	NA	0.26221
Heart	Gm38071	0.496967	NA	NA	NA	NA	NA	NA	NA	1	NA	NA	NA	NA	NA	NA	NA	0.000240784	NA	NA	NA	NA	NA	NA	NA	NA	NA	NA	NA	NA	NA	NA	0.262196
Heart	Pced1b	0.621505	NA	NA	NA	NA	NA	NA	NA	1	NA	NA	NA	NA	NA	NA	NA	0.000146994	NA	NA	NA	NA	NA	NA	NA	NA	NA	NA	NA	NA	NA	NA	0.262107
Heart	Psg29	-0.28195	1.4975	NA	NA	NA	NA	NA	NA	0	1	NA	NA	NA	NA	NA	NA	0.337647	0.0879913	NA	NA	NA	NA	NA	NA	14.9442	NA	NA	NA	NA	NA	NA	0.261992
Heart	Gm47696	0.70729	-2.4628	0.73961	NA	NA	NA	NA	NA	0	0	1	NA	NA	NA	NA	NA	0.156524	0.489397	0.0786152	NA	NA	NA	NA	NA	9.94806	13.3644	NA	NA	NA	NA	NA	0.261986
Heart	Cpq	1533.2	-5.4315	NA	NA	NA	NA	NA	NA	0	-1	NA	NA	NA	NA	NA	NA	0.147456	0.0856742	NA	NA	NA	NA	NA	NA	3.06035	NA	NA	NA	NA	NA	NA	0.261916
Heart	Iglc2	0.336118	NA	NA	NA	NA	NA	NA	NA	1	NA	NA	NA	NA	NA	NA	NA	0.000150313	NA	NA	NA	NA	NA	NA	NA	NA	NA	NA	NA	NA	NA	NA	0.261661
Heart	Gm10440	-100.45	0.76576	NA	NA	NA	NA	NA	NA	0	1	NA	NA	NA	NA	NA	NA	0.240297	0.0754098	NA	NA	NA	NA	NA	NA	3.12912	NA	NA	NA	NA	NA	NA	0.26144
Heart	Casp1	0.843534	NA	NA	NA	NA	NA	NA	NA	1	NA	NA	NA	NA	NA	NA	NA	0.000660966	NA	NA	NA	NA	NA	NA	NA	NA	NA	NA	NA	NA	NA	NA	0.261436
Heart	Gm45194	0.313003	NA	NA	NA	NA	NA	NA	NA	1	NA	NA	NA	NA	NA	NA	NA	0.0614782	NA	NA	NA	NA	NA	NA	NA	NA	NA	NA	NA	NA	NA	NA	0.261393
Heart	Narf	-15.9764	NA	NA	NA	NA	NA	NA	NA	-1	NA	NA	NA	NA	NA	NA	NA	0.000156643	NA	NA	NA	NA	NA	NA	NA	NA	NA	NA	NA	NA	NA	NA	0.261328
Heart	Pof1b	0.387637	NA	NA	NA	NA	NA	NA	NA	1	NA	NA	NA	NA	NA	NA	NA	0.088186	NA	NA	NA	NA	NA	NA	NA	NA	NA	NA	NA	NA	NA	NA	0.261182
Heart	Acad8	4.3359	-12.219	NA	NA	NA	NA	NA	NA	0	-1	NA	NA	NA	NA	NA	NA	0.254501	0.0848868	NA	NA	NA	NA	NA	NA	14.3845	NA	NA	NA	NA	NA	NA	0.26105
Heart	Crtac1	0.43052	NA	NA	NA	NA	NA	NA	NA	1	NA	NA	NA	NA	NA	NA	NA	0.000237917	NA	NA	NA	NA	NA	NA	NA	NA	NA	NA	NA	NA	NA	NA	0.260978
Heart	Rps2	-24.4597	NA	NA	NA	NA	NA	NA	NA	-1	NA	NA	NA	NA	NA	NA	NA	0.000190748	NA	NA	NA	NA	NA	NA	NA	NA	NA	NA	NA	NA	NA	NA	0.260731
Heart	Gm37611	-1.0016	1.2898	NA	NA	NA	NA	NA	NA	0	1	NA	NA	NA	NA	NA	NA	0.14164	0.0861403	NA	NA	NA	NA	NA	NA	13.4344	NA	NA	NA	NA	NA	NA	0.260647
Heart	Gm45516	0.550668	NA	NA	NA	NA	NA	NA	NA	1	NA	NA	NA	NA	NA	NA	NA	0.00104643	NA	NA	NA	NA	NA	NA	NA	NA	NA	NA	NA	NA	NA	NA	0.260481
Heart	Fth-ps2	-45.387	0.4071	NA	NA	NA	NA	NA	NA	0	1	NA	NA	NA	NA	NA	NA	0.288912	0.0866666	NA	NA	NA	NA	NA	NA	3.22653	NA	NA	NA	NA	NA	NA	0.260468
Heart	Nrg4	1.15728	NA	NA	NA	NA	NA	NA	NA	1	NA	NA	NA	NA	NA	NA	NA	0.000177694	NA	NA	NA	NA	NA	NA	NA	NA	NA	NA	NA	NA	NA	NA	0.260336
Heart	Sla	1.73746	NA	NA	NA	NA	NA	NA	NA	1	NA	NA	NA	NA	NA	NA	NA	0.000269376	NA	NA	NA	NA	NA	NA	NA	NA	NA	NA	NA	NA	NA	NA	0.260085
Heart	Tie1	-13.8894	NA	NA	NA	NA	NA	NA	NA	-1	NA	NA	NA	NA	NA	NA	NA	0.00014741	NA	NA	NA	NA	NA	NA	NA	NA	NA	NA	NA	NA	NA	NA	0.2597
Heart	Sf3b2	-8.23264	NA	NA	NA	NA	NA	NA	NA	-1	NA	NA	NA	NA	NA	NA	NA	0.000811737	NA	NA	NA	NA	NA	NA	NA	NA	NA	NA	NA	NA	NA	NA	0.259585
Heart	Rhbdl2	0.454757	NA	NA	NA	NA	NA	NA	NA	1	NA	NA	NA	NA	NA	NA	NA	0.000171003	NA	NA	NA	NA	NA	NA	NA	NA	NA	NA	NA	NA	NA	NA	0.259561
Heart	Ankrd1	82.3595	NA	NA	NA	NA	NA	NA	NA	1	NA	NA	NA	NA	NA	NA	NA	0.00324725	NA	NA	NA	NA	NA	NA	NA	NA	NA	NA	NA	NA	NA	NA	0.259466
Heart	Gm5087	0.729051	NA	NA	NA	NA	NA	NA	NA	1	NA	NA	NA	NA	NA	NA	NA	0.00174825	NA	NA	NA	NA	NA	NA	NA	NA	NA	NA	NA	NA	NA	NA	0.259414
Heart	Gm42517	2.0637	-1.8777	NA	NA	NA	NA	NA	NA	1	0	NA	NA	NA	NA	NA	NA	0.0840613	0.144911	NA	NA	NA	NA	NA	NA	16.4166	NA	NA	NA	NA	NA	NA	0.259045
Heart	Zkscan5	-3.04946	NA	NA	NA	NA	NA	NA	NA	-1	NA	NA	NA	NA	NA	NA	NA	0.000152457	NA	NA	NA	NA	NA	NA	NA	NA	NA	NA	NA	NA	NA	NA	0.259036
Heart	Prkar2a	-11.4989	NA	NA	NA	NA	NA	NA	NA	-1	NA	NA	NA	NA	NA	NA	NA	0.000270685	NA	NA	NA	NA	NA	NA	NA	NA	NA	NA	NA	NA	NA	NA	0.259002
Heart	Tpra1	-4.52891	NA	NA	NA	NA	NA	NA	NA	-1	NA	NA	NA	NA	NA	NA	NA	0.000230324	NA	NA	NA	NA	NA	NA	NA	NA	NA	NA	NA	NA	NA	NA	0.25897
Heart	Klhl33	-4.14275	NA	NA	NA	NA	NA	NA	NA	-1	NA	NA	NA	NA	NA	NA	NA	0.000177748	NA	NA	NA	NA	NA	NA	NA	NA	NA	NA	NA	NA	NA	NA	0.258963
Heart	Golm1	-2.27563	NA	NA	NA	NA	NA	NA	NA	-1	NA	NA	NA	NA	NA	NA	NA	0.000437117	NA	NA	NA	NA	NA	NA	NA	NA	NA	NA	NA	NA	NA	NA	0.258941
Heart	Qsox2	-4.81384	NA	NA	NA	NA	NA	NA	NA	-1	NA	NA	NA	NA	NA	NA	NA	0.000227261	NA	NA	NA	NA	NA	NA	NA	NA	NA	NA	NA	NA	NA	NA	0.258763
Heart	Apol9a	-0.47787	1.415	NA	NA	NA	NA	NA	NA	0	1	NA	NA	NA	NA	NA	NA	0.259997	0.0836899	NA	NA	NA	NA	NA	NA	14.9442	NA	NA	NA	NA	NA	NA	0.258732
Heart	Gm28359	0.380414	NA	NA	NA	NA	NA	NA	NA	1	NA	NA	NA	NA	NA	NA	NA	0.000272331	NA	NA	NA	NA	NA	NA	NA	NA	NA	NA	NA	NA	NA	NA	0.258706
Heart	Rab6a	-6.79029	NA	NA	NA	NA	NA	NA	NA	-1	NA	NA	NA	NA	NA	NA	NA	0.000161744	NA	NA	NA	NA	NA	NA	NA	NA	NA	NA	NA	NA	NA	NA	0.258672
Heart	Sox11	-0.73102	1.7122	NA	NA	NA	NA	NA	NA	0	1	NA	NA	NA	NA	NA	NA	0.212438	0.0879652	NA	NA	NA	NA	NA	NA	14.9442	NA	NA	NA	NA	NA	NA	0.258514
Heart	Ncoa5	-2.86561	NA	NA	NA	NA	NA	NA	NA	-1	NA	NA	NA	NA	NA	NA	NA	0.000174986	NA	NA	NA	NA	NA	NA	NA	NA	NA	NA	NA	NA	NA	NA	0.258505
Heart	Pik3r5	1.05772	NA	NA	NA	NA	NA	NA	NA	1	NA	NA	NA	NA	NA	NA	NA	0.000158643	NA	NA	NA	NA	NA	NA	NA	NA	NA	NA	NA	NA	NA	NA	0.258391
Heart	Grk4	2.7888	-2.8445	2.0907	NA	NA	NA	NA	NA	0	0	1	NA	NA	NA	NA	NA	0.210538	0.201047	0.0760926	NA	NA	NA	NA	NA	7.86809	14.9431	NA	NA	NA	NA	NA	0.258051
Heart	Klra10	0.318748	NA	NA	NA	NA	NA	NA	NA	1	NA	NA	NA	NA	NA	NA	NA	0.000185212	NA	NA	NA	NA	NA	NA	NA	NA	NA	NA	NA	NA	NA	NA	0.257922
Heart	Nploc4	-6.68923	NA	NA	NA	NA	NA	NA	NA	-1	NA	NA	NA	NA	NA	NA	NA	0.0192365	NA	NA	NA	NA	NA	NA	NA	NA	NA	NA	NA	NA	NA	NA	0.257881
Heart	Bmp15	0.192892	NA	NA	NA	NA	NA	NA	NA	1	NA	NA	NA	NA	NA	NA	NA	0.080498	NA	NA	NA	NA	NA	NA	NA	NA	NA	NA	NA	NA	NA	NA	0.257811
Heart	Sh2d4a	-2.00088	NA	NA	NA	NA	NA	NA	NA	-1	NA	NA	NA	NA	NA	NA	NA	0.00337214	NA	NA	NA	NA	NA	NA	NA	NA	NA	NA	NA	NA	NA	NA	0.257674
Heart	Fetub	0.719076	NA	NA	NA	NA	NA	NA	NA	1	NA	NA	NA	NA	NA	NA	NA	0.00147246	NA	NA	NA	NA	NA	NA	NA	NA	NA	NA	NA	NA	NA	NA	0.257662
Heart	Mgmt	0.901468	NA	NA	NA	NA	NA	NA	NA	1	NA	NA	NA	NA	NA	NA	NA	0.0246362	NA	NA	NA	NA	NA	NA	NA	NA	NA	NA	NA	NA	NA	NA	0.257602
Heart	Myzap	-31.4084	NA	NA	NA	NA	NA	NA	NA	-1	NA	NA	NA	NA	NA	NA	NA	0.000697765	NA	NA	NA	NA	NA	NA	NA	NA	NA	NA	NA	NA	NA	NA	0.257601
Heart	Gm43230	0.382899	NA	NA	NA	NA	NA	NA	NA	1	NA	NA	NA	NA	NA	NA	NA	0.000239462	NA	NA	NA	NA	NA	NA	NA	NA	NA	NA	NA	NA	NA	NA	0.257587
Heart	Tmem120a	-4.0287	7.0391	NA	NA	NA	NA	NA	NA	-1	0	NA	NA	NA	NA	NA	NA	0.089951	0.146767	NA	NA	NA	NA	NA	NA	19.8306	NA	NA	NA	NA	NA	NA	0.257565
Heart	Ndnf	3.25361	NA	NA	NA	NA	NA	NA	NA	1	NA	NA	NA	NA	NA	NA	NA	0.000208482	NA	NA	NA	NA	NA	NA	NA	NA	NA	NA	NA	NA	NA	NA	0.257445
Heart	Etnppl	-0.90746	2.9872	NA	NA	NA	NA	NA	NA	0	1	NA	NA	NA	NA	NA	NA	0.290344	0.0909467	NA	NA	NA	NA	NA	NA	14.0735	NA	NA	NA	NA	NA	NA	0.257289
Heart	Nlgn3	0.442308	NA	NA	NA	NA	NA	NA	NA	1	NA	NA	NA	NA	NA	NA	NA	0.00863184	NA	NA	NA	NA	NA	NA	NA	NA	NA	NA	NA	NA	NA	NA	0.257287
Heart	Peli3	2.7642	-3.2263	NA	NA	NA	NA	NA	NA	1	0	NA	NA	NA	NA	NA	NA	0.0899115	0.124034	NA	NA	NA	NA	NA	NA	17.2532	NA	NA	NA	NA	NA	NA	0.257159
Heart	Cpxm2	11.367	NA	NA	NA	NA	NA	NA	NA	1	NA	NA	NA	NA	NA	NA	NA	0.0104043	NA	NA	NA	NA	NA	NA	NA	NA	NA	NA	NA	NA	NA	NA	0.257034
Heart	Des	-173.288	NA	NA	NA	NA	NA	NA	NA	-1	NA	NA	NA	NA	NA	NA	NA	0.000281238	NA	NA	NA	NA	NA	NA	NA	NA	NA	NA	NA	NA	NA	NA	0.256984
Heart	Gm45379	0.32378	NA	NA	NA	NA	NA	NA	NA	1	NA	NA	NA	NA	NA	NA	NA	0.000352538	NA	NA	NA	NA	NA	NA	NA	NA	NA	NA	NA	NA	NA	NA	0.256967
Heart	Gm38375	-2.7596	0.79282	NA	NA	NA	NA	NA	NA	0	1	NA	NA	NA	NA	NA	NA	0.16092	0.0823189	NA	NA	NA	NA	NA	NA	6.49152	NA	NA	NA	NA	NA	NA	0.256741
Heart	Rabl3	1.77031	NA	NA	NA	NA	NA	NA	NA	1	NA	NA	NA	NA	NA	NA	NA	0.000189808	NA	NA	NA	NA	NA	NA	NA	NA	NA	NA	NA	NA	NA	NA	0.256544
Heart	Tceal3	0.343478	NA	NA	NA	NA	NA	NA	NA	1	NA	NA	NA	NA	NA	NA	NA	0.010211	NA	NA	NA	NA	NA	NA	NA	NA	NA	NA	NA	NA	NA	NA	0.256533
Heart	Mpnd	-7.49167	NA	NA	NA	NA	NA	NA	NA	-1	NA	NA	NA	NA	NA	NA	NA	0.000173441	NA	NA	NA	NA	NA	NA	NA	NA	NA	NA	NA	NA	NA	NA	0.256532
Heart	Sval3	0.276778	NA	NA	NA	NA	NA	NA	NA	1	NA	NA	NA	NA	NA	NA	NA	0.000163407	NA	NA	NA	NA	NA	NA	NA	NA	NA	NA	NA	NA	NA	NA	0.256423
Heart	Cytip	-7.3301	1.8349	NA	NA	NA	NA	NA	NA	0	1	NA	NA	NA	NA	NA	NA	0.150145	0.0868419	NA	NA	NA	NA	NA	NA	6.19703	NA	NA	NA	NA	NA	NA	0.256406
Heart	Hrc	40.734	-101.83	NA	NA	NA	NA	NA	NA	0	-1	NA	NA	NA	NA	NA	NA	0.201816	0.0850285	NA	NA	NA	NA	NA	NA	14.9442	NA	NA	NA	NA	NA	NA	0.256398
Heart	Gm14401	-0.53056	0.82943	NA	NA	NA	NA	NA	NA	0	1	NA	NA	NA	NA	NA	NA	0.179858	0.0937945	NA	NA	NA	NA	NA	NA	12.7583	NA	NA	NA	NA	NA	NA	0.256373
Heart	Akirin2	-3.46096	NA	NA	NA	NA	NA	NA	NA	-1	NA	NA	NA	NA	NA	NA	NA	0.000231331	NA	NA	NA	NA	NA	NA	NA	NA	NA	NA	NA	NA	NA	NA	0.256281
Heart	Dnajb9	-8.04781	NA	NA	NA	NA	NA	NA	NA	-1	NA	NA	NA	NA	NA	NA	NA	0.000283448	NA	NA	NA	NA	NA	NA	NA	NA	NA	NA	NA	NA	NA	NA	0.256167
Heart	Tdrp	1.87735	NA	NA	NA	NA	NA	NA	NA	1	NA	NA	NA	NA	NA	NA	NA	0.000655415	NA	NA	NA	NA	NA	NA	NA	NA	NA	NA	NA	NA	NA	NA	0.255847
Heart	Ccdc97	-4.7091	NA	NA	NA	NA	NA	NA	NA	-1	NA	NA	NA	NA	NA	NA	NA	0.000613133	NA	NA	NA	NA	NA	NA	NA	NA	NA	NA	NA	NA	NA	NA	0.255454
Heart	Rnf24	1.05112	NA	NA	NA	NA	NA	NA	NA	1	NA	NA	NA	NA	NA	NA	NA	0.00182668	NA	NA	NA	NA	NA	NA	NA	NA	NA	NA	NA	NA	NA	NA	0.25542
Heart	Fbxo3	7.2712	-16.38	NA	NA	NA	NA	NA	NA	0	-1	NA	NA	NA	NA	NA	NA	0.235909	0.0938187	NA	NA	NA	NA	NA	NA	13.8735	NA	NA	NA	NA	NA	NA	0.255255
Heart	Ifi209	1.08978	NA	NA	NA	NA	NA	NA	NA	1	NA	NA	NA	NA	NA	NA	NA	0.000609724	NA	NA	NA	NA	NA	NA	NA	NA	NA	NA	NA	NA	NA	NA	0.255134
Heart	Idh3b	-64.5081	NA	NA	NA	NA	NA	NA	NA	-1	NA	NA	NA	NA	NA	NA	NA	0.000271092	NA	NA	NA	NA	NA	NA	NA	NA	NA	NA	NA	NA	NA	NA	0.255033
Heart	Gm42966	-74.911	0.33537	NA	NA	NA	NA	NA	NA	0	1	NA	NA	NA	NA	NA	NA	0.16977	0.0803707	NA	NA	NA	NA	NA	NA	3.06226	NA	NA	NA	NA	NA	NA	0.255016
Heart	Gm37184	0.23411	NA	NA	NA	NA	NA	NA	NA	1	NA	NA	NA	NA	NA	NA	NA	0.000173798	NA	NA	NA	NA	NA	NA	NA	NA	NA	NA	NA	NA	NA	NA	0.254915
Heart	Gm33045	0.309017	NA	NA	NA	NA	NA	NA	NA	1	NA	NA	NA	NA	NA	NA	NA	0.0014743	NA	NA	NA	NA	NA	NA	NA	NA	NA	NA	NA	NA	NA	NA	0.254886
Heart	Smco1	-1.96198	NA	NA	NA	NA	NA	NA	NA	-1	NA	NA	NA	NA	NA	NA	NA	0.000790349	NA	NA	NA	NA	NA	NA	NA	NA	NA	NA	NA	NA	NA	NA	0.254852
Heart	Lrfn5	1.75965	NA	NA	NA	NA	NA	NA	NA	1	NA	NA	NA	NA	NA	NA	NA	0.000271877	NA	NA	NA	NA	NA	NA	NA	NA	NA	NA	NA	NA	NA	NA	0.254837
Heart	4930459L07Rik	-82.632	0.33502	NA	NA	NA	NA	NA	NA	0	1	NA	NA	NA	NA	NA	NA	0.185834	0.0839487	NA	NA	NA	NA	NA	NA	3.09393	NA	NA	NA	NA	NA	NA	0.254733
Heart	Atp8b1	1.33141	NA	NA	NA	NA	NA	NA	NA	1	NA	NA	NA	NA	NA	NA	NA	0.0109581	NA	NA	NA	NA	NA	NA	NA	NA	NA	NA	NA	NA	NA	NA	0.254688
Heart	Lcp1	8.23285	NA	NA	NA	NA	NA	NA	NA	1	NA	NA	NA	NA	NA	NA	NA	0.000249521	NA	NA	NA	NA	NA	NA	NA	NA	NA	NA	NA	NA	NA	NA	0.254645
Heart	Tas2r126	0.435643	NA	NA	NA	NA	NA	NA	NA	1	NA	NA	NA	NA	NA	NA	NA	0.000659153	NA	NA	NA	NA	NA	NA	NA	NA	NA	NA	NA	NA	NA	NA	0.254385
Heart	Atpaf2	-5.69641	NA	NA	NA	NA	NA	NA	NA	-1	NA	NA	NA	NA	NA	NA	NA	0.00019168	NA	NA	NA	NA	NA	NA	NA	NA	NA	NA	NA	NA	NA	NA	0.254297
Heart	Ryr1	1.40027	NA	NA	NA	NA	NA	NA	NA	1	NA	NA	NA	NA	NA	NA	NA	0.00026482	NA	NA	NA	NA	NA	NA	NA	NA	NA	NA	NA	NA	NA	NA	0.254165
Heart	Adap1	1.28497	NA	NA	NA	NA	NA	NA	NA	1	NA	NA	NA	NA	NA	NA	NA	0.000324879	NA	NA	NA	NA	NA	NA	NA	NA	NA	NA	NA	NA	NA	NA	0.254094
Heart	Slc25a42	-12.1143	NA	NA	NA	NA	NA	NA	NA	-1	NA	NA	NA	NA	NA	NA	NA	0.00157128	NA	NA	NA	NA	NA	NA	NA	NA	NA	NA	NA	NA	NA	NA	0.253939
Heart	Gm20430	-2.7931	0.4474	NA	NA	NA	NA	NA	NA	0	1	NA	NA	NA	NA	NA	NA	0.113485	0.0983632	NA	NA	NA	NA	NA	NA	6.68931	NA	NA	NA	NA	NA	NA	0.253728
Heart	Cops2	23.81	-5.703	NA	NA	NA	NA	NA	NA	0	-1	NA	NA	NA	NA	NA	NA	0.140632	0.0842765	NA	NA	NA	NA	NA	NA	6.48632	NA	NA	NA	NA	NA	NA	0.253712
Heart	Gm10439	0.113555	NA	NA	NA	NA	NA	NA	NA	1	NA	NA	NA	NA	NA	NA	NA	0.0499296	NA	NA	NA	NA	NA	NA	NA	NA	NA	NA	NA	NA	NA	NA	0.2537
Heart	Cog4	-7.63643	NA	NA	NA	NA	NA	NA	NA	-1	NA	NA	NA	NA	NA	NA	NA	0.000413122	NA	NA	NA	NA	NA	NA	NA	NA	NA	NA	NA	NA	NA	NA	0.253698
Heart	Ptcd3	-8.23409	NA	NA	NA	NA	NA	NA	NA	-1	NA	NA	NA	NA	NA	NA	NA	0.00222489	NA	NA	NA	NA	NA	NA	NA	NA	NA	NA	NA	NA	NA	NA	0.253679
Heart	Rspo3	-95.879	0.85604	NA	NA	NA	NA	NA	NA	0	1	NA	NA	NA	NA	NA	NA	0.283019	0.0839551	NA	NA	NA	NA	NA	NA	3.17468	NA	NA	NA	NA	NA	NA	0.253636
Heart	Vmn1r86	0.76701	NA	NA	NA	NA	NA	NA	NA	1	NA	NA	NA	NA	NA	NA	NA	0.000406144	NA	NA	NA	NA	NA	NA	NA	NA	NA	NA	NA	NA	NA	NA	0.253462
Heart	Gm44639	0.29149	NA	NA	NA	NA	NA	NA	NA	1	NA	NA	NA	NA	NA	NA	NA	0.00837584	NA	NA	NA	NA	NA	NA	NA	NA	NA	NA	NA	NA	NA	NA	0.253402
Heart	Gm37498	-3.904	0.58435	NA	NA	NA	NA	NA	NA	0	1	NA	NA	NA	NA	NA	NA	0.107082	0.0990657	NA	NA	NA	NA	NA	NA	6.12064	NA	NA	NA	NA	NA	NA	0.253042
Heart	Gm8882	0.231091	NA	NA	NA	NA	NA	NA	NA	1	NA	NA	NA	NA	NA	NA	NA	0.000255481	NA	NA	NA	NA	NA	NA	NA	NA	NA	NA	NA	NA	NA	NA	0.253031
Heart	Cyp4b1	39.262	-8.4519	NA	NA	NA	NA	NA	NA	0	-1	NA	NA	NA	NA	NA	NA	0.141864	0.0941448	NA	NA	NA	NA	NA	NA	7.44929	NA	NA	NA	NA	NA	NA	0.253019
Heart	Haus1	-0.937537	NA	NA	NA	NA	NA	NA	NA	-1	NA	NA	NA	NA	NA	NA	NA	0.0111092	NA	NA	NA	NA	NA	NA	NA	NA	NA	NA	NA	NA	NA	NA	0.252978
Heart	Mx1	-247.29	0.78827	NA	NA	NA	NA	NA	NA	0	1	NA	NA	NA	NA	NA	NA	0.136149	0.0868373	NA	NA	NA	NA	NA	NA	3.05659	NA	NA	NA	NA	NA	NA	0.25297
Heart	1700063K16Rik	0.248432	NA	NA	NA	NA	NA	NA	NA	1	NA	NA	NA	NA	NA	NA	NA	0.000246661	NA	NA	NA	NA	NA	NA	NA	NA	NA	NA	NA	NA	NA	NA	0.252853
Heart	Cd3eap	-3.1414	1.0819	NA	NA	NA	NA	NA	NA	-1	0	NA	NA	NA	NA	NA	NA	0.0816538	0.286186	NA	NA	NA	NA	NA	NA	15.0537	NA	NA	NA	NA	NA	NA	0.252821
Heart	Immt	-56.5561	NA	NA	NA	NA	NA	NA	NA	-1	NA	NA	NA	NA	NA	NA	NA	0.000461565	NA	NA	NA	NA	NA	NA	NA	NA	NA	NA	NA	NA	NA	NA	0.252798
Heart	Frk	1.23297	NA	NA	NA	NA	NA	NA	NA	1	NA	NA	NA	NA	NA	NA	NA	0.000180072	NA	NA	NA	NA	NA	NA	NA	NA	NA	NA	NA	NA	NA	NA	0.252772
Heart	B3galt2	6.3776	-4.7682	NA	NA	NA	NA	NA	NA	1	0	NA	NA	NA	NA	NA	NA	0.0945085	0.189174	NA	NA	NA	NA	NA	NA	16.7683	NA	NA	NA	NA	NA	NA	0.25276
Heart	Gm18856	0.170974	NA	NA	NA	NA	NA	NA	NA	1	NA	NA	NA	NA	NA	NA	NA	0.0105909	NA	NA	NA	NA	NA	NA	NA	NA	NA	NA	NA	NA	NA	NA	0.252697
Heart	Mccc1	16.465	-24.508	NA	NA	NA	NA	NA	NA	0	-1	NA	NA	NA	NA	NA	NA	0.178544	0.0975745	NA	NA	NA	NA	NA	NA	12.992	NA	NA	NA	NA	NA	NA	0.25264
Heart	Olfr592	-1.1311	2.7611	NA	NA	NA	NA	NA	NA	0	1	NA	NA	NA	NA	NA	NA	0.249159	0.0944595	NA	NA	NA	NA	NA	NA	13.8041	NA	NA	NA	NA	NA	NA	0.2526
Heart	Aco1	-2.73941	NA	NA	NA	NA	NA	NA	NA	-1	NA	NA	NA	NA	NA	NA	NA	0.00647265	NA	NA	NA	NA	NA	NA	NA	NA	NA	NA	NA	NA	NA	NA	0.252572
Heart	4933401J01Rik	-0.42238	0.97712	NA	NA	NA	NA	NA	NA	0	1	NA	NA	NA	NA	NA	NA	0.247349	0.0980579	NA	NA	NA	NA	NA	NA	14.2704	NA	NA	NA	NA	NA	NA	0.252521
Heart	Speer4e	0.414811	NA	NA	NA	NA	NA	NA	NA	1	NA	NA	NA	NA	NA	NA	NA	0.000182251	NA	NA	NA	NA	NA	NA	NA	NA	NA	NA	NA	NA	NA	NA	0.25238
Heart	Map7d1	-30.1044	NA	NA	NA	NA	NA	NA	NA	-1	NA	NA	NA	NA	NA	NA	NA	0.000353159	NA	NA	NA	NA	NA	NA	NA	NA	NA	NA	NA	NA	NA	NA	0.252227
Heart	Dnaja2	1656.5	-23.412	NA	NA	NA	NA	NA	NA	0	-1	NA	NA	NA	NA	NA	NA	0.35111	0.0851351	NA	NA	NA	NA	NA	NA	3.25953	NA	NA	NA	NA	NA	NA	0.25211
Heart	Gm49152	-0.18494	0.59275	NA	NA	NA	NA	NA	NA	0	1	NA	NA	NA	NA	NA	NA	0.279936	0.0873673	NA	NA	NA	NA	NA	NA	14.9431	NA	NA	NA	NA	NA	NA	0.251969
Heart	Glg1	-14.5275	NA	NA	NA	NA	NA	NA	NA	-1	NA	NA	NA	NA	NA	NA	NA	0.000564745	NA	NA	NA	NA	NA	NA	NA	NA	NA	NA	NA	NA	NA	NA	0.251801
Heart	Ptprn	1.45539	NA	NA	NA	NA	NA	NA	NA	1	NA	NA	NA	NA	NA	NA	NA	0.00437089	NA	NA	NA	NA	NA	NA	NA	NA	NA	NA	NA	NA	NA	NA	0.25168
Heart	Fgfr2	0.950656	NA	NA	NA	NA	NA	NA	NA	1	NA	NA	NA	NA	NA	NA	NA	0.000251043	NA	NA	NA	NA	NA	NA	NA	NA	NA	NA	NA	NA	NA	NA	0.251587
Heart	Emc3	-5.77598	NA	NA	NA	NA	NA	NA	NA	-1	NA	NA	NA	NA	NA	NA	NA	0.000218837	NA	NA	NA	NA	NA	NA	NA	NA	NA	NA	NA	NA	NA	NA	0.251554
Heart	Ankrd45	1.62389	NA	NA	NA	NA	NA	NA	NA	1	NA	NA	NA	NA	NA	NA	NA	0.00341623	NA	NA	NA	NA	NA	NA	NA	NA	NA	NA	NA	NA	NA	NA	0.251541
Heart	Mcur1	-7.52814	NA	NA	NA	NA	NA	NA	NA	-1	NA	NA	NA	NA	NA	NA	NA	0.000415721	NA	NA	NA	NA	NA	NA	NA	NA	NA	NA	NA	NA	NA	NA	0.251501
Heart	Prr32	0.242976	NA	NA	NA	NA	NA	NA	NA	1	NA	NA	NA	NA	NA	NA	NA	0.00603855	NA	NA	NA	NA	NA	NA	NA	NA	NA	NA	NA	NA	NA	NA	0.251378
Heart	Necap1	2.1249	-9.3165	NA	NA	NA	NA	NA	NA	0	-1	NA	NA	NA	NA	NA	NA	0.217273	0.0945821	NA	NA	NA	NA	NA	NA	17.3738	NA	NA	NA	NA	NA	NA	0.251333
Heart	Plcxd2	1.23378	NA	NA	NA	NA	NA	NA	NA	1	NA	NA	NA	NA	NA	NA	NA	0.00108717	NA	NA	NA	NA	NA	NA	NA	NA	NA	NA	NA	NA	NA	NA	0.251313
Heart	Acss1	-77.0088	NA	NA	NA	NA	NA	NA	NA	-1	NA	NA	NA	NA	NA	NA	NA	0.000214253	NA	NA	NA	NA	NA	NA	NA	NA	NA	NA	NA	NA	NA	NA	0.251253
Heart	Vmn2r44	-141.03	0.90385	NA	NA	NA	NA	NA	NA	0	1	NA	NA	NA	NA	NA	NA	0.219599	0.0785448	NA	NA	NA	NA	NA	NA	3.10369	NA	NA	NA	NA	NA	NA	0.251246
Heart	Irf7	7.57766	NA	NA	NA	NA	NA	NA	NA	1	NA	NA	NA	NA	NA	NA	NA	0.000342717	NA	NA	NA	NA	NA	NA	NA	NA	NA	NA	NA	NA	NA	NA	0.25108
Heart	Prkaca	-20.0693	NA	NA	NA	NA	NA	NA	NA	-1	NA	NA	NA	NA	NA	NA	NA	0.00254246	NA	NA	NA	NA	NA	NA	NA	NA	NA	NA	NA	NA	NA	NA	0.251025
Heart	4932438A13Rik	-1403.9	5.5537	NA	NA	NA	NA	NA	NA	0	1	NA	NA	NA	NA	NA	NA	0.171648	0.0915883	NA	NA	NA	NA	NA	NA	3.09824	NA	NA	NA	NA	NA	NA	0.250898
Heart	Vps13c	3.44642	NA	NA	NA	NA	NA	NA	NA	1	NA	NA	NA	NA	NA	NA	NA	0.000314944	NA	NA	NA	NA	NA	NA	NA	NA	NA	NA	NA	NA	NA	NA	0.250849
Heart	Ercc6l	0.435984	NA	NA	NA	NA	NA	NA	NA	1	NA	NA	NA	NA	NA	NA	NA	0.0232839	NA	NA	NA	NA	NA	NA	NA	NA	NA	NA	NA	NA	NA	NA	0.250796
Heart	Cd3e	0.649067	NA	NA	NA	NA	NA	NA	NA	1	NA	NA	NA	NA	NA	NA	NA	0.000244318	NA	NA	NA	NA	NA	NA	NA	NA	NA	NA	NA	NA	NA	NA	0.250555
Heart	Gm16423	0.16166	NA	NA	NA	NA	NA	NA	NA	1	NA	NA	NA	NA	NA	NA	NA	0.0909851	NA	NA	NA	NA	NA	NA	NA	NA	NA	NA	NA	NA	NA	NA	0.250339
Heart	Gm41311	0.34502	NA	NA	NA	NA	NA	NA	NA	1	NA	NA	NA	NA	NA	NA	NA	0.000428041	NA	NA	NA	NA	NA	NA	NA	NA	NA	NA	NA	NA	NA	NA	0.250318
Heart	Vit	0.954047	NA	NA	NA	NA	NA	NA	NA	1	NA	NA	NA	NA	NA	NA	NA	0.0152471	NA	NA	NA	NA	NA	NA	NA	NA	NA	NA	NA	NA	NA	NA	0.25027
Heart	H2-T22	4.03642	NA	NA	NA	NA	NA	NA	NA	1	NA	NA	NA	NA	NA	NA	NA	0.000254439	NA	NA	NA	NA	NA	NA	NA	NA	NA	NA	NA	NA	NA	NA	0.250123
Heart	Slc2a3	-2.8669	2.2524	NA	NA	NA	NA	NA	NA	0	1	NA	NA	NA	NA	NA	NA	0.163365	0.0830306	NA	NA	NA	NA	NA	NA	10.6767	NA	NA	NA	NA	NA	NA	0.250102
Heart	Clcn5	0.931764	NA	NA	NA	NA	NA	NA	NA	1	NA	NA	NA	NA	NA	NA	NA	0.0520736	NA	NA	NA	NA	NA	NA	NA	NA	NA	NA	NA	NA	NA	NA	0.250017
Heart	Krt34	0.278924	NA	NA	NA	NA	NA	NA	NA	1	NA	NA	NA	NA	NA	NA	NA	0.00237348	NA	NA	NA	NA	NA	NA	NA	NA	NA	NA	NA	NA	NA	NA	0.250005
Heart	Mmp21	0.277264	NA	NA	NA	NA	NA	NA	NA	1	NA	NA	NA	NA	NA	NA	NA	0.00255068	NA	NA	NA	NA	NA	NA	NA	NA	NA	NA	NA	NA	NA	NA	0.249798
Heart	Snai3	1.02705	NA	NA	NA	NA	NA	NA	NA	1	NA	NA	NA	NA	NA	NA	NA	0.0069248	NA	NA	NA	NA	NA	NA	NA	NA	NA	NA	NA	NA	NA	NA	0.249764
Heart	Rasef	1.46189	NA	NA	NA	NA	NA	NA	NA	1	NA	NA	NA	NA	NA	NA	NA	0.000482217	NA	NA	NA	NA	NA	NA	NA	NA	NA	NA	NA	NA	NA	NA	0.249676
Heart	Syngr2	-11.9782	NA	NA	NA	NA	NA	NA	NA	-1	NA	NA	NA	NA	NA	NA	NA	0.000340433	NA	NA	NA	NA	NA	NA	NA	NA	NA	NA	NA	NA	NA	NA	0.249673
Heart	Gm37354	0.413808	NA	NA	NA	NA	NA	NA	NA	1	NA	NA	NA	NA	NA	NA	NA	0.000209906	NA	NA	NA	NA	NA	NA	NA	NA	NA	NA	NA	NA	NA	NA	0.249657
Heart	Cchcr1	-1.3069	1.4801	NA	NA	NA	NA	NA	NA	0	1	NA	NA	NA	NA	NA	NA	0.137131	0.0938563	NA	NA	NA	NA	NA	NA	13.735	NA	NA	NA	NA	NA	NA	0.249631
Heart	Gm10787	0.183847	NA	NA	NA	NA	NA	NA	NA	1	NA	NA	NA	NA	NA	NA	NA	0.00805267	NA	NA	NA	NA	NA	NA	NA	NA	NA	NA	NA	NA	NA	NA	0.249619
Heart	Fv1	-2.05164	NA	NA	NA	NA	NA	NA	NA	-1	NA	NA	NA	NA	NA	NA	NA	0.000280388	NA	NA	NA	NA	NA	NA	NA	NA	NA	NA	NA	NA	NA	NA	0.249567
Heart	Hvcn1	0.634081	NA	NA	NA	NA	NA	NA	NA	1	NA	NA	NA	NA	NA	NA	NA	0.000287613	NA	NA	NA	NA	NA	NA	NA	NA	NA	NA	NA	NA	NA	NA	0.249428
Heart	Gm47743	0.472563	NA	NA	NA	NA	NA	NA	NA	1	NA	NA	NA	NA	NA	NA	NA	0.000207344	NA	NA	NA	NA	NA	NA	NA	NA	NA	NA	NA	NA	NA	NA	0.24942
Heart	Chrna7	-260.04	0.71843	NA	NA	NA	NA	NA	NA	0	1	NA	NA	NA	NA	NA	NA	0.127412	0.0926616	NA	NA	NA	NA	NA	NA	3.06117	NA	NA	NA	NA	NA	NA	0.249397
Heart	Hgs	-5.94433	NA	NA	NA	NA	NA	NA	NA	-1	NA	NA	NA	NA	NA	NA	NA	0.00020564	NA	NA	NA	NA	NA	NA	NA	NA	NA	NA	NA	NA	NA	NA	0.249225
Heart	Ctsl	9753.6	-15.155	NA	NA	NA	NA	NA	NA	0	-1	NA	NA	NA	NA	NA	NA	0.193625	0.0760035	NA	NA	NA	NA	NA	NA	3.01576	NA	NA	NA	NA	NA	NA	0.249225
Heart	Gid8	-2.86025	NA	NA	NA	NA	NA	NA	NA	-1	NA	NA	NA	NA	NA	NA	NA	0.000964883	NA	NA	NA	NA	NA	NA	NA	NA	NA	NA	NA	NA	NA	NA	0.249181
Heart	Zfp874b	-0.773168	NA	NA	NA	NA	NA	NA	NA	-1	NA	NA	NA	NA	NA	NA	NA	0.0113708	NA	NA	NA	NA	NA	NA	NA	NA	NA	NA	NA	NA	NA	NA	0.24916
Heart	Rnf103	-4.80165	NA	NA	NA	NA	NA	NA	NA	-1	NA	NA	NA	NA	NA	NA	NA	0.000215372	NA	NA	NA	NA	NA	NA	NA	NA	NA	NA	NA	NA	NA	NA	0.249055
Heart	Olfr362	0.606596	NA	NA	NA	NA	NA	NA	NA	1	NA	NA	NA	NA	NA	NA	NA	0.000413154	NA	NA	NA	NA	NA	NA	NA	NA	NA	NA	NA	NA	NA	NA	0.24899
Heart	Tjp3	0.27815	NA	NA	NA	NA	NA	NA	NA	1	NA	NA	NA	NA	NA	NA	NA	0.00706771	NA	NA	NA	NA	NA	NA	NA	NA	NA	NA	NA	NA	NA	NA	0.248966
Heart	Rps6ka6	0.54949	-0.74296	NA	NA	NA	NA	NA	NA	1	0	NA	NA	NA	NA	NA	NA	0.0853267	0.173727	NA	NA	NA	NA	NA	NA	19.2001	NA	NA	NA	NA	NA	NA	0.248934
Heart	Dda1	-5.1163	NA	NA	NA	NA	NA	NA	NA	-1	NA	NA	NA	NA	NA	NA	NA	0.000296975	NA	NA	NA	NA	NA	NA	NA	NA	NA	NA	NA	NA	NA	NA	0.248872
Heart	9530026F06Rik	0.31352	NA	NA	NA	NA	NA	NA	NA	1	NA	NA	NA	NA	NA	NA	NA	0.000202971	NA	NA	NA	NA	NA	NA	NA	NA	NA	NA	NA	NA	NA	NA	0.248853
Heart	Ube2d1	2.7419	-9.7897	NA	NA	NA	NA	NA	NA	0	-1	NA	NA	NA	NA	NA	NA	0.176767	0.0889618	NA	NA	NA	NA	NA	NA	17.6468	NA	NA	NA	NA	NA	NA	0.248777
Heart	Ugt8a	1.43868	NA	NA	NA	NA	NA	NA	NA	1	NA	NA	NA	NA	NA	NA	NA	0.000870548	NA	NA	NA	NA	NA	NA	NA	NA	NA	NA	NA	NA	NA	NA	0.248696
Heart	Nfam1	0.96877	NA	NA	NA	NA	NA	NA	NA	1	NA	NA	NA	NA	NA	NA	NA	0.0108967	NA	NA	NA	NA	NA	NA	NA	NA	NA	NA	NA	NA	NA	NA	0.248421
Heart	Hsp90b1	-34.8823	NA	NA	NA	NA	NA	NA	NA	-1	NA	NA	NA	NA	NA	NA	NA	0.000433505	NA	NA	NA	NA	NA	NA	NA	NA	NA	NA	NA	NA	NA	NA	0.24834
Heart	Emc2	-6.51012	NA	NA	NA	NA	NA	NA	NA	-1	NA	NA	NA	NA	NA	NA	NA	0.000327923	NA	NA	NA	NA	NA	NA	NA	NA	NA	NA	NA	NA	NA	NA	0.248181
Heart	Gm20642	0.485034	NA	NA	NA	NA	NA	NA	NA	1	NA	NA	NA	NA	NA	NA	NA	0.000206419	NA	NA	NA	NA	NA	NA	NA	NA	NA	NA	NA	NA	NA	NA	0.248159
Heart	Aig1	-4.857	NA	NA	NA	NA	NA	NA	NA	-1	NA	NA	NA	NA	NA	NA	NA	0.00021401	NA	NA	NA	NA	NA	NA	NA	NA	NA	NA	NA	NA	NA	NA	0.248038
Heart	Cct3	-12.8845	NA	NA	NA	NA	NA	NA	NA	-1	NA	NA	NA	NA	NA	NA	NA	0.000210912	NA	NA	NA	NA	NA	NA	NA	NA	NA	NA	NA	NA	NA	NA	0.248027
Heart	Gm48962	0.169764	NA	NA	NA	NA	NA	NA	NA	1	NA	NA	NA	NA	NA	NA	NA	0.00856779	NA	NA	NA	NA	NA	NA	NA	NA	NA	NA	NA	NA	NA	NA	0.248011
Heart	Mrpl45	-6.12366	NA	NA	NA	NA	NA	NA	NA	-1	NA	NA	NA	NA	NA	NA	NA	0.000320706	NA	NA	NA	NA	NA	NA	NA	NA	NA	NA	NA	NA	NA	NA	0.247983
Heart	Rhox4d	0.223349	NA	NA	NA	NA	NA	NA	NA	1	NA	NA	NA	NA	NA	NA	NA	0.00286489	NA	NA	NA	NA	NA	NA	NA	NA	NA	NA	NA	NA	NA	NA	0.24786
Heart	Ablim3	-7.41782	NA	NA	NA	NA	NA	NA	NA	-1	NA	NA	NA	NA	NA	NA	NA	0.000405651	NA	NA	NA	NA	NA	NA	NA	NA	NA	NA	NA	NA	NA	NA	0.247855
Heart	Olfr319	0.477735	NA	NA	NA	NA	NA	NA	NA	1	NA	NA	NA	NA	NA	NA	NA	0.000215158	NA	NA	NA	NA	NA	NA	NA	NA	NA	NA	NA	NA	NA	NA	0.247694
Heart	Gm44027	0.73054	NA	NA	NA	NA	NA	NA	NA	1	NA	NA	NA	NA	NA	NA	NA	0.000629565	NA	NA	NA	NA	NA	NA	NA	NA	NA	NA	NA	NA	NA	NA	0.247659
Heart	Tex11	0.639233	NA	NA	NA	NA	NA	NA	NA	1	NA	NA	NA	NA	NA	NA	NA	0.0414049	NA	NA	NA	NA	NA	NA	NA	NA	NA	NA	NA	NA	NA	NA	0.247647
Heart	Olfr1469	-4.7875	1.0062	NA	NA	NA	NA	NA	NA	0	1	NA	NA	NA	NA	NA	NA	0.134987	0.0923558	NA	NA	NA	NA	NA	NA	6.271	NA	NA	NA	NA	NA	NA	0.247585
Heart	Xpnpep1	-2.90884	NA	NA	NA	NA	NA	NA	NA	-1	NA	NA	NA	NA	NA	NA	NA	0.0324112	NA	NA	NA	NA	NA	NA	NA	NA	NA	NA	NA	NA	NA	NA	0.247495
Heart	Gm28579	0.168973	NA	NA	NA	NA	NA	NA	NA	1	NA	NA	NA	NA	NA	NA	NA	0.0041928	NA	NA	NA	NA	NA	NA	NA	NA	NA	NA	NA	NA	NA	NA	0.247421
Heart	Mtif2	-3.25802	NA	NA	NA	NA	NA	NA	NA	-1	NA	NA	NA	NA	NA	NA	NA	0.000349812	NA	NA	NA	NA	NA	NA	NA	NA	NA	NA	NA	NA	NA	NA	0.247403
Heart	Dhrs1	-2.56598	NA	NA	NA	NA	NA	NA	NA	-1	NA	NA	NA	NA	NA	NA	NA	0.00470314	NA	NA	NA	NA	NA	NA	NA	NA	NA	NA	NA	NA	NA	NA	0.247281
Heart	Ogfrl1	-4.6744	5.7143	NA	NA	NA	NA	NA	NA	-1	0	NA	NA	NA	NA	NA	NA	0.0989435	0.130345	NA	NA	NA	NA	NA	NA	17.9632	NA	NA	NA	NA	NA	NA	0.247169
Heart	Dpysl4	1.09669	NA	NA	NA	NA	NA	NA	NA	1	NA	NA	NA	NA	NA	NA	NA	0.00231307	NA	NA	NA	NA	NA	NA	NA	NA	NA	NA	NA	NA	NA	NA	0.247163
Heart	Carnmt1	-4.8585	NA	NA	NA	NA	NA	NA	NA	-1	NA	NA	NA	NA	NA	NA	NA	0.000304437	NA	NA	NA	NA	NA	NA	NA	NA	NA	NA	NA	NA	NA	NA	0.247127
Heart	Cd164	-8.84849	NA	NA	NA	NA	NA	NA	NA	-1	NA	NA	NA	NA	NA	NA	NA	0.000547856	NA	NA	NA	NA	NA	NA	NA	NA	NA	NA	NA	NA	NA	NA	0.24711
Heart	Gm45941	0.361412	NA	NA	NA	NA	NA	NA	NA	1	NA	NA	NA	NA	NA	NA	NA	0.00233105	NA	NA	NA	NA	NA	NA	NA	NA	NA	NA	NA	NA	NA	NA	0.247105
Heart	Gm19337	0.284186	NA	NA	NA	NA	NA	NA	NA	1	NA	NA	NA	NA	NA	NA	NA	0.00304669	NA	NA	NA	NA	NA	NA	NA	NA	NA	NA	NA	NA	NA	NA	0.247035
Heart	Rdh14	-7.05822	NA	NA	NA	NA	NA	NA	NA	-1	NA	NA	NA	NA	NA	NA	NA	0.000214298	NA	NA	NA	NA	NA	NA	NA	NA	NA	NA	NA	NA	NA	NA	0.246997
Heart	Gm18935	0.260313	NA	NA	NA	NA	NA	NA	NA	1	NA	NA	NA	NA	NA	NA	NA	0.000225771	NA	NA	NA	NA	NA	NA	NA	NA	NA	NA	NA	NA	NA	NA	0.246947
Heart	Gm47817	0.435506	NA	NA	NA	NA	NA	NA	NA	1	NA	NA	NA	NA	NA	NA	NA	0.0104242	NA	NA	NA	NA	NA	NA	NA	NA	NA	NA	NA	NA	NA	NA	0.246934
Heart	Sgip1	1.13239	NA	NA	NA	NA	NA	NA	NA	1	NA	NA	NA	NA	NA	NA	NA	0.000462607	NA	NA	NA	NA	NA	NA	NA	NA	NA	NA	NA	NA	NA	NA	0.24692
Heart	Lilrb4a	1.95901	NA	NA	NA	NA	NA	NA	NA	1	NA	NA	NA	NA	NA	NA	NA	0.00113875	NA	NA	NA	NA	NA	NA	NA	NA	NA	NA	NA	NA	NA	NA	0.246919
Heart	Gm19165	-37.382	0.37248	NA	NA	NA	NA	NA	NA	0	1	NA	NA	NA	NA	NA	NA	0.296004	0.0819272	NA	NA	NA	NA	NA	NA	3.19102	NA	NA	NA	NA	NA	NA	0.246894
Heart	Fto	-6.33884	NA	NA	NA	NA	NA	NA	NA	-1	NA	NA	NA	NA	NA	NA	NA	0.000620509	NA	NA	NA	NA	NA	NA	NA	NA	NA	NA	NA	NA	NA	NA	0.246713
Heart	Angptl4	-12.2603	NA	NA	NA	NA	NA	NA	NA	-1	NA	NA	NA	NA	NA	NA	NA	0.000216012	NA	NA	NA	NA	NA	NA	NA	NA	NA	NA	NA	NA	NA	NA	0.246707
Heart	Gm11149	-0.50189	1.2855	NA	NA	NA	NA	NA	NA	0	1	NA	NA	NA	NA	NA	NA	0.233878	0.0919976	NA	NA	NA	NA	NA	NA	14.9434	NA	NA	NA	NA	NA	NA	0.246703
Heart	Ces2a	-0.30955	0.94721	NA	NA	NA	NA	NA	NA	0	1	NA	NA	NA	NA	NA	NA	0.256895	0.0890273	NA	NA	NA	NA	NA	NA	14.9583	NA	NA	NA	NA	NA	NA	0.246494
Heart	H2-M3	1.58745	NA	NA	NA	NA	NA	NA	NA	1	NA	NA	NA	NA	NA	NA	NA	0.000223189	NA	NA	NA	NA	NA	NA	NA	NA	NA	NA	NA	NA	NA	NA	0.246458
Heart	Gm37041	0.442389	NA	NA	NA	NA	NA	NA	NA	1	NA	NA	NA	NA	NA	NA	NA	0.000666756	NA	NA	NA	NA	NA	NA	NA	NA	NA	NA	NA	NA	NA	NA	0.246448
Heart	Gfra4	-1.84522	NA	NA	NA	NA	NA	NA	NA	-1	NA	NA	NA	NA	NA	NA	NA	0.000259206	NA	NA	NA	NA	NA	NA	NA	NA	NA	NA	NA	NA	NA	NA	0.246414
Heart	Pcx	2765.2	-7.0275	NA	NA	NA	NA	NA	NA	0	-1	NA	NA	NA	NA	NA	NA	0.160555	0.0834348	NA	NA	NA	NA	NA	NA	3.04049	NA	NA	NA	NA	NA	NA	0.246404
Heart	Rassf5	1.13959	NA	NA	NA	NA	NA	NA	NA	1	NA	NA	NA	NA	NA	NA	NA	0.000491433	NA	NA	NA	NA	NA	NA	NA	NA	NA	NA	NA	NA	NA	NA	0.24639
Heart	Wnt10a	-52.399	0.23201	NA	NA	NA	NA	NA	NA	0	1	NA	NA	NA	NA	NA	NA	0.18368	0.0891463	NA	NA	NA	NA	NA	NA	3.11035	NA	NA	NA	NA	NA	NA	0.246201
Heart	D030068K23Rik	-0.82643	2.4883	NA	NA	NA	NA	NA	NA	0	1	NA	NA	NA	NA	NA	NA	0.270303	0.0876346	NA	NA	NA	NA	NA	NA	14.397	NA	NA	NA	NA	NA	NA	0.24616
Heart	Creld2	-4.57994	NA	NA	NA	NA	NA	NA	NA	-1	NA	NA	NA	NA	NA	NA	NA	0.000502989	NA	NA	NA	NA	NA	NA	NA	NA	NA	NA	NA	NA	NA	NA	0.246131
Heart	Kcnab2	0.803204	NA	NA	NA	NA	NA	NA	NA	1	NA	NA	NA	NA	NA	NA	NA	0.000283261	NA	NA	NA	NA	NA	NA	NA	NA	NA	NA	NA	NA	NA	NA	0.245851
Heart	Pcdhac2	0.717798	NA	NA	NA	NA	NA	NA	NA	1	NA	NA	NA	NA	NA	NA	NA	0.00039627	NA	NA	NA	NA	NA	NA	NA	NA	NA	NA	NA	NA	NA	NA	0.245708
Heart	Ngfr	0.878609	NA	NA	NA	NA	NA	NA	NA	1	NA	NA	NA	NA	NA	NA	NA	0.00316955	NA	NA	NA	NA	NA	NA	NA	NA	NA	NA	NA	NA	NA	NA	0.245649
Heart	Tex26	-0.23881	1.3358	NA	NA	NA	NA	NA	NA	0	1	NA	NA	NA	NA	NA	NA	0.262737	0.098549	NA	NA	NA	NA	NA	NA	17.2455	NA	NA	NA	NA	NA	NA	0.245581
Heart	Trim37	2.37613	NA	NA	NA	NA	NA	NA	NA	1	NA	NA	NA	NA	NA	NA	NA	0.00131258	NA	NA	NA	NA	NA	NA	NA	NA	NA	NA	NA	NA	NA	NA	0.245545
Heart	Gm47359	-0.76328	1.0155	NA	NA	NA	NA	NA	NA	0	1	NA	NA	NA	NA	NA	NA	0.144512	0.0850662	NA	NA	NA	NA	NA	NA	14.9532	NA	NA	NA	NA	NA	NA	0.245483
Heart	Wdr41	-2.70942	NA	NA	NA	NA	NA	NA	NA	-1	NA	NA	NA	NA	NA	NA	NA	0.00536844	NA	NA	NA	NA	NA	NA	NA	NA	NA	NA	NA	NA	NA	NA	0.245479
Heart	Gm1527	-209.95	0.79298	NA	NA	NA	NA	NA	NA	0	1	NA	NA	NA	NA	NA	NA	0.177255	0.0907675	NA	NA	NA	NA	NA	NA	3.04826	NA	NA	NA	NA	NA	NA	0.245459
Heart	Gm44760	0.27877	NA	NA	NA	NA	NA	NA	NA	1	NA	NA	NA	NA	NA	NA	NA	0.00345785	NA	NA	NA	NA	NA	NA	NA	NA	NA	NA	NA	NA	NA	NA	0.245271
Heart	Bag5	-2.64197	NA	NA	NA	NA	NA	NA	NA	-1	NA	NA	NA	NA	NA	NA	NA	0.000418719	NA	NA	NA	NA	NA	NA	NA	NA	NA	NA	NA	NA	NA	NA	0.245212
Heart	Plekhb2	-10.6038	NA	NA	NA	NA	NA	NA	NA	-1	NA	NA	NA	NA	NA	NA	NA	0.0144683	NA	NA	NA	NA	NA	NA	NA	NA	NA	NA	NA	NA	NA	NA	0.245177
Heart	Mx2	1.03972	NA	NA	NA	NA	NA	NA	NA	1	NA	NA	NA	NA	NA	NA	NA	0.000369868	NA	NA	NA	NA	NA	NA	NA	NA	NA	NA	NA	NA	NA	NA	0.245095
Heart	Nfkbid	-0.67321	1.1422	NA	NA	NA	NA	NA	NA	0	1	NA	NA	NA	NA	NA	NA	0.146786	0.0959434	NA	NA	NA	NA	NA	NA	14.9968	NA	NA	NA	NA	NA	NA	0.244865
Heart	Sult2a6	-0.30673	0.96807	NA	NA	NA	NA	NA	NA	0	1	NA	NA	NA	NA	NA	NA	0.264303	0.0905013	NA	NA	NA	NA	NA	NA	14.9436	NA	NA	NA	NA	NA	NA	0.244777
Heart	Rhbdd3	-2.8625	NA	NA	NA	NA	NA	NA	NA	-1	NA	NA	NA	NA	NA	NA	NA	0.000512518	NA	NA	NA	NA	NA	NA	NA	NA	NA	NA	NA	NA	NA	NA	0.244759
Heart	Tnfrsf26	0.802789	NA	NA	NA	NA	NA	NA	NA	1	NA	NA	NA	NA	NA	NA	NA	0.000279676	NA	NA	NA	NA	NA	NA	NA	NA	NA	NA	NA	NA	NA	NA	0.244605
Heart	Mmab	6.3882	-18.359	NA	NA	NA	NA	NA	NA	0	-1	NA	NA	NA	NA	NA	NA	0.146333	0.088291	NA	NA	NA	NA	NA	NA	17.8127	NA	NA	NA	NA	NA	NA	0.244517
Heart	Eda2r	1.19934	NA	NA	NA	NA	NA	NA	NA	1	NA	NA	NA	NA	NA	NA	NA	0.00135249	NA	NA	NA	NA	NA	NA	NA	NA	NA	NA	NA	NA	NA	NA	0.24444
Heart	Csdc2	-18.944	NA	NA	NA	NA	NA	NA	NA	-1	NA	NA	NA	NA	NA	NA	NA	0.00028485	NA	NA	NA	NA	NA	NA	NA	NA	NA	NA	NA	NA	NA	NA	0.244397
Heart	Armc6	-1.38765	NA	NA	NA	NA	NA	NA	NA	-1	NA	NA	NA	NA	NA	NA	NA	0.000865433	NA	NA	NA	NA	NA	NA	NA	NA	NA	NA	NA	NA	NA	NA	0.244326
Heart	Gabra3	0.953287	NA	NA	NA	NA	NA	NA	NA	1	NA	NA	NA	NA	NA	NA	NA	0.00343202	NA	NA	NA	NA	NA	NA	NA	NA	NA	NA	NA	NA	NA	NA	0.244232
Heart	Runx1	1.40173	NA	NA	NA	NA	NA	NA	NA	1	NA	NA	NA	NA	NA	NA	NA	0.000249667	NA	NA	NA	NA	NA	NA	NA	NA	NA	NA	NA	NA	NA	NA	0.24411
Heart	Acadvl	-98.3122	NA	NA	NA	NA	NA	NA	NA	-1	NA	NA	NA	NA	NA	NA	NA	0.000333839	NA	NA	NA	NA	NA	NA	NA	NA	NA	NA	NA	NA	NA	NA	0.243796
Heart	Acaa1a	-7.06942	NA	NA	NA	NA	NA	NA	NA	-1	NA	NA	NA	NA	NA	NA	NA	0.000275974	NA	NA	NA	NA	NA	NA	NA	NA	NA	NA	NA	NA	NA	NA	0.243567
Heart	Olfr1480	0.585628	NA	NA	NA	NA	NA	NA	NA	1	NA	NA	NA	NA	NA	NA	NA	0.000278629	NA	NA	NA	NA	NA	NA	NA	NA	NA	NA	NA	NA	NA	NA	0.243527
Heart	Mavs	-9.32727	NA	NA	NA	NA	NA	NA	NA	-1	NA	NA	NA	NA	NA	NA	NA	0.00453044	NA	NA	NA	NA	NA	NA	NA	NA	NA	NA	NA	NA	NA	NA	0.24344
Heart	Tmem196	1.14035	NA	NA	NA	NA	NA	NA	NA	1	NA	NA	NA	NA	NA	NA	NA	0.000713319	NA	NA	NA	NA	NA	NA	NA	NA	NA	NA	NA	NA	NA	NA	0.243143
Heart	Gm13914	-26.521	0.33942	NA	NA	NA	NA	NA	NA	0	1	NA	NA	NA	NA	NA	NA	0.328061	0.0794514	NA	NA	NA	NA	NA	NA	3.22977	NA	NA	NA	NA	NA	NA	0.243099
Heart	Hpse	1.1121	NA	NA	NA	NA	NA	NA	NA	1	NA	NA	NA	NA	NA	NA	NA	0.000284417	NA	NA	NA	NA	NA	NA	NA	NA	NA	NA	NA	NA	NA	NA	0.24308
Heart	Gm33450	0.475367	NA	NA	NA	NA	NA	NA	NA	1	NA	NA	NA	NA	NA	NA	NA	0.00125576	NA	NA	NA	NA	NA	NA	NA	NA	NA	NA	NA	NA	NA	NA	0.243044
Heart	Vps4a	-5.96937	NA	NA	NA	NA	NA	NA	NA	-1	NA	NA	NA	NA	NA	NA	NA	0.000263844	NA	NA	NA	NA	NA	NA	NA	NA	NA	NA	NA	NA	NA	NA	0.24298
Heart	Pex13	-2.5694	NA	NA	NA	NA	NA	NA	NA	-1	NA	NA	NA	NA	NA	NA	NA	0.0118729	NA	NA	NA	NA	NA	NA	NA	NA	NA	NA	NA	NA	NA	NA	0.242913
Heart	Phospho2	35.239	-4.8398	NA	NA	NA	NA	NA	NA	0	-1	NA	NA	NA	NA	NA	NA	0.482501	0.0806237	NA	NA	NA	NA	NA	NA	5.63227	NA	NA	NA	NA	NA	NA	0.242726
Heart	Olfr19	0.337317	NA	NA	NA	NA	NA	NA	NA	1	NA	NA	NA	NA	NA	NA	NA	0.000243714	NA	NA	NA	NA	NA	NA	NA	NA	NA	NA	NA	NA	NA	NA	0.242473
Heart	Gm11597	0.234938	NA	NA	NA	NA	NA	NA	NA	1	NA	NA	NA	NA	NA	NA	NA	0.000260512	NA	NA	NA	NA	NA	NA	NA	NA	NA	NA	NA	NA	NA	NA	0.24235
Heart	Gm14988	0.175464	NA	NA	NA	NA	NA	NA	NA	1	NA	NA	NA	NA	NA	NA	NA	0.0508685	NA	NA	NA	NA	NA	NA	NA	NA	NA	NA	NA	NA	NA	NA	0.242253
Heart	Btbd1	16.829	-51.964	NA	NA	NA	NA	NA	NA	0	-1	NA	NA	NA	NA	NA	NA	0.17335	0.0997841	NA	NA	NA	NA	NA	NA	17.7022	NA	NA	NA	NA	NA	NA	0.242231
Heart	Gm12763	0.438835	NA	NA	NA	NA	NA	NA	NA	1	NA	NA	NA	NA	NA	NA	NA	0.000250131	NA	NA	NA	NA	NA	NA	NA	NA	NA	NA	NA	NA	NA	NA	0.242146
Heart	Plcd3	-1.53744	NA	NA	NA	NA	NA	NA	NA	-1	NA	NA	NA	NA	NA	NA	NA	0.00104706	NA	NA	NA	NA	NA	NA	NA	NA	NA	NA	NA	NA	NA	NA	0.24213
Heart	Pcdhb21	0.698034	NA	NA	NA	NA	NA	NA	NA	1	NA	NA	NA	NA	NA	NA	NA	0.000519123	NA	NA	NA	NA	NA	NA	NA	NA	NA	NA	NA	NA	NA	NA	0.242104
Heart	Lck	0.415731	NA	NA	NA	NA	NA	NA	NA	1	NA	NA	NA	NA	NA	NA	NA	0.00504929	NA	NA	NA	NA	NA	NA	NA	NA	NA	NA	NA	NA	NA	NA	0.242071
Heart	Sash3	1.04895	NA	NA	NA	NA	NA	NA	NA	1	NA	NA	NA	NA	NA	NA	NA	0.000357114	NA	NA	NA	NA	NA	NA	NA	NA	NA	NA	NA	NA	NA	NA	0.242025
Heart	Gm5317	0.298105	NA	NA	NA	NA	NA	NA	NA	1	NA	NA	NA	NA	NA	NA	NA	0.00504689	NA	NA	NA	NA	NA	NA	NA	NA	NA	NA	NA	NA	NA	NA	0.241985
Heart	Olfr452	0.781132	NA	NA	NA	NA	NA	NA	NA	1	NA	NA	NA	NA	NA	NA	NA	0.000523633	NA	NA	NA	NA	NA	NA	NA	NA	NA	NA	NA	NA	NA	NA	0.241958
Heart	Olfr898	-0.41506	1.3095	NA	NA	NA	NA	NA	NA	0	1	NA	NA	NA	NA	NA	NA	0.265663	0.0940044	NA	NA	NA	NA	NA	NA	14.9514	NA	NA	NA	NA	NA	NA	0.241923
Heart	Sox10	-0.874799	NA	NA	NA	NA	NA	NA	NA	-1	NA	NA	NA	NA	NA	NA	NA	0.000556881	NA	NA	NA	NA	NA	NA	NA	NA	NA	NA	NA	NA	NA	NA	0.241851
Heart	Gpr183	0.562509	NA	NA	NA	NA	NA	NA	NA	1	NA	NA	NA	NA	NA	NA	NA	0.0156234	NA	NA	NA	NA	NA	NA	NA	NA	NA	NA	NA	NA	NA	NA	0.241809
Heart	Olfr1249	-290.41	0.55943	NA	NA	NA	NA	NA	NA	0	1	NA	NA	NA	NA	NA	NA	0.172161	0.0914628	NA	NA	NA	NA	NA	NA	3.02988	NA	NA	NA	NA	NA	NA	0.241755
Heart	Ak1	-83.967	NA	NA	NA	NA	NA	NA	NA	-1	NA	NA	NA	NA	NA	NA	NA	0.00108323	NA	NA	NA	NA	NA	NA	NA	NA	NA	NA	NA	NA	NA	NA	0.241718
Heart	Zscan20	4.2487	-2.8772	NA	NA	NA	NA	NA	NA	1	0	NA	NA	NA	NA	NA	NA	0.0855618	0.188289	NA	NA	NA	NA	NA	NA	16.2448	NA	NA	NA	NA	NA	NA	0.24167
Heart	Fbln5	-5.75646	NA	NA	NA	NA	NA	NA	NA	-1	NA	NA	NA	NA	NA	NA	NA	0.000275107	NA	NA	NA	NA	NA	NA	NA	NA	NA	NA	NA	NA	NA	NA	0.241565
Heart	Gm29293	0.541122	NA	NA	NA	NA	NA	NA	NA	1	NA	NA	NA	NA	NA	NA	NA	0.000250407	NA	NA	NA	NA	NA	NA	NA	NA	NA	NA	NA	NA	NA	NA	0.241539
Heart	Zfr	6.5677	-20.401	NA	NA	NA	NA	NA	NA	0	-1	NA	NA	NA	NA	NA	NA	0.170455	0.0967836	NA	NA	NA	NA	NA	NA	17.0446	NA	NA	NA	NA	NA	NA	0.24144
Heart	Diaph1	1.57658	NA	NA	NA	NA	NA	NA	NA	1	NA	NA	NA	NA	NA	NA	NA	0.000896377	NA	NA	NA	NA	NA	NA	NA	NA	NA	NA	NA	NA	NA	NA	0.241321
Heart	Ywhae	-15.4436	NA	NA	NA	NA	NA	NA	NA	-1	NA	NA	NA	NA	NA	NA	NA	0.000276992	NA	NA	NA	NA	NA	NA	NA	NA	NA	NA	NA	NA	NA	NA	0.241016
Heart	Gm48063	0.469745	NA	NA	NA	NA	NA	NA	NA	1	NA	NA	NA	NA	NA	NA	NA	0.00299632	NA	NA	NA	NA	NA	NA	NA	NA	NA	NA	NA	NA	NA	NA	0.240922
Heart	Olfr352	-4.993	1.3518	NA	NA	NA	NA	NA	NA	0	1	NA	NA	NA	NA	NA	NA	0.158121	0.0854004	NA	NA	NA	NA	NA	NA	6.90028	NA	NA	NA	NA	NA	NA	0.240905
Heart	Copg1	-6.14702	NA	NA	NA	NA	NA	NA	NA	-1	NA	NA	NA	NA	NA	NA	NA	0.00351241	NA	NA	NA	NA	NA	NA	NA	NA	NA	NA	NA	NA	NA	NA	0.240867
Heart	Gm29825	0.804073	NA	NA	NA	NA	NA	NA	NA	1	NA	NA	NA	NA	NA	NA	NA	0.00364667	NA	NA	NA	NA	NA	NA	NA	NA	NA	NA	NA	NA	NA	NA	0.24065
Heart	Pgk1	-11.0957	NA	NA	NA	NA	NA	NA	NA	-1	NA	NA	NA	NA	NA	NA	NA	0.000373589	NA	NA	NA	NA	NA	NA	NA	NA	NA	NA	NA	NA	NA	NA	0.240541
Heart	Tlcd1	-1.26451	NA	NA	NA	NA	NA	NA	NA	-1	NA	NA	NA	NA	NA	NA	NA	0.000431554	NA	NA	NA	NA	NA	NA	NA	NA	NA	NA	NA	NA	NA	NA	0.240484
Heart	Gm14582	0.290516	NA	NA	NA	NA	NA	NA	NA	1	NA	NA	NA	NA	NA	NA	NA	0.0100551	NA	NA	NA	NA	NA	NA	NA	NA	NA	NA	NA	NA	NA	NA	0.240454
Heart	Ldlrad4	-1.967	8.7356	NA	NA	NA	NA	NA	NA	-1	0	NA	NA	NA	NA	NA	NA	0.0832769	0.150408	NA	NA	NA	NA	NA	NA	22.6785	NA	NA	NA	NA	NA	NA	0.24039
Heart	Klf15	-16.8893	NA	NA	NA	NA	NA	NA	NA	-1	NA	NA	NA	NA	NA	NA	NA	0.000582402	NA	NA	NA	NA	NA	NA	NA	NA	NA	NA	NA	NA	NA	NA	0.240358
Heart	Rnpepl1	-12.9291	NA	NA	NA	NA	NA	NA	NA	-1	NA	NA	NA	NA	NA	NA	NA	0.000672664	NA	NA	NA	NA	NA	NA	NA	NA	NA	NA	NA	NA	NA	NA	0.240028
Heart	Slc13a4	0.875551	NA	NA	NA	NA	NA	NA	NA	1	NA	NA	NA	NA	NA	NA	NA	0.000879187	NA	NA	NA	NA	NA	NA	NA	NA	NA	NA	NA	NA	NA	NA	0.239907
Heart	Gm36480	0.120276	NA	NA	NA	NA	NA	NA	NA	1	NA	NA	NA	NA	NA	NA	NA	0.0688036	NA	NA	NA	NA	NA	NA	NA	NA	NA	NA	NA	NA	NA	NA	0.239898
Heart	Casq2	-69.7622	NA	NA	NA	NA	NA	NA	NA	-1	NA	NA	NA	NA	NA	NA	NA	0.000635466	NA	NA	NA	NA	NA	NA	NA	NA	NA	NA	NA	NA	NA	NA	0.239875
Heart	Osgepl1	-4.96981	NA	NA	NA	NA	NA	NA	NA	-1	NA	NA	NA	NA	NA	NA	NA	0.00116214	NA	NA	NA	NA	NA	NA	NA	NA	NA	NA	NA	NA	NA	NA	0.239762
Heart	Gm43820	0.148235	NA	NA	NA	NA	NA	NA	NA	1	NA	NA	NA	NA	NA	NA	NA	0.0807436	NA	NA	NA	NA	NA	NA	NA	NA	NA	NA	NA	NA	NA	NA	0.239743
Heart	Spop	-19.8358	NA	NA	NA	NA	NA	NA	NA	-1	NA	NA	NA	NA	NA	NA	NA	0.000463048	NA	NA	NA	NA	NA	NA	NA	NA	NA	NA	NA	NA	NA	NA	0.239716
Heart	Pde6d	-3.03617	NA	NA	NA	NA	NA	NA	NA	-1	NA	NA	NA	NA	NA	NA	NA	0.000288679	NA	NA	NA	NA	NA	NA	NA	NA	NA	NA	NA	NA	NA	NA	0.239465
Heart	Gm12793	-85.933	0.3527	NA	NA	NA	NA	NA	NA	0	1	NA	NA	NA	NA	NA	NA	0.151404	0.0918762	NA	NA	NA	NA	NA	NA	3.07867	NA	NA	NA	NA	NA	NA	0.239307
Heart	Tex13c3	0.120699	NA	NA	NA	NA	NA	NA	NA	1	NA	NA	NA	NA	NA	NA	NA	0.0898365	NA	NA	NA	NA	NA	NA	NA	NA	NA	NA	NA	NA	NA	NA	0.239273
Heart	Rhoj	-7.91864	NA	NA	NA	NA	NA	NA	NA	-1	NA	NA	NA	NA	NA	NA	NA	0.000324402	NA	NA	NA	NA	NA	NA	NA	NA	NA	NA	NA	NA	NA	NA	0.239175
Heart	Wdr86	34.014	-3.851	0.93774	NA	NA	NA	NA	NA	0	0	1	NA	NA	NA	NA	NA	0.391661	0.124241	0.0972941	NA	NA	NA	NA	NA	3.60092	10.3533	NA	NA	NA	NA	NA	0.239133
Heart	Slc25a3	-133.788	NA	NA	NA	NA	NA	NA	NA	-1	NA	NA	NA	NA	NA	NA	NA	0.00186913	NA	NA	NA	NA	NA	NA	NA	NA	NA	NA	NA	NA	NA	NA	0.239072
Heart	Gm45895	0.213582	NA	NA	NA	NA	NA	NA	NA	1	NA	NA	NA	NA	NA	NA	NA	0.000275818	NA	NA	NA	NA	NA	NA	NA	NA	NA	NA	NA	NA	NA	NA	0.239027
Heart	4933413J09Rik	0.604352	NA	NA	NA	NA	NA	NA	NA	1	NA	NA	NA	NA	NA	NA	NA	0.0035898	NA	NA	NA	NA	NA	NA	NA	NA	NA	NA	NA	NA	NA	NA	0.238979
Heart	Ube2g1	-10.7582	NA	NA	NA	NA	NA	NA	NA	-1	NA	NA	NA	NA	NA	NA	NA	0.000270408	NA	NA	NA	NA	NA	NA	NA	NA	NA	NA	NA	NA	NA	NA	0.238907
Heart	Jak1	1970	-14.101	NA	NA	NA	NA	NA	NA	0	-1	NA	NA	NA	NA	NA	NA	0.246677	0.082045	NA	NA	NA	NA	NA	NA	3.12067	NA	NA	NA	NA	NA	NA	0.238857
Heart	Gm45697	0.530246	NA	NA	NA	NA	NA	NA	NA	1	NA	NA	NA	NA	NA	NA	NA	0.00404285	NA	NA	NA	NA	NA	NA	NA	NA	NA	NA	NA	NA	NA	NA	0.238856
Heart	Pisd-ps1	1.34721	NA	NA	NA	NA	NA	NA	NA	1	NA	NA	NA	NA	NA	NA	NA	0.00048216	NA	NA	NA	NA	NA	NA	NA	NA	NA	NA	NA	NA	NA	NA	0.238783
Heart	Rab9b	0.354463	NA	NA	NA	NA	NA	NA	NA	1	NA	NA	NA	NA	NA	NA	NA	0.0240208	NA	NA	NA	NA	NA	NA	NA	NA	NA	NA	NA	NA	NA	NA	0.238766
Heart	Ifngr2	-18.1065	NA	NA	NA	NA	NA	NA	NA	-1	NA	NA	NA	NA	NA	NA	NA	0.00096472	NA	NA	NA	NA	NA	NA	NA	NA	NA	NA	NA	NA	NA	NA	0.23868
Heart	Pcdhb12	0.444735	NA	NA	NA	NA	NA	NA	NA	1	NA	NA	NA	NA	NA	NA	NA	0.000300727	NA	NA	NA	NA	NA	NA	NA	NA	NA	NA	NA	NA	NA	NA	0.23846
Heart	Pygm	-119.641	NA	NA	NA	NA	NA	NA	NA	-1	NA	NA	NA	NA	NA	NA	NA	0.000456381	NA	NA	NA	NA	NA	NA	NA	NA	NA	NA	NA	NA	NA	NA	0.238343
Heart	Unc45b	-45.2766	NA	NA	NA	NA	NA	NA	NA	-1	NA	NA	NA	NA	NA	NA	NA	0.0002772	NA	NA	NA	NA	NA	NA	NA	NA	NA	NA	NA	NA	NA	NA	0.238237
Heart	Mgme1	-3.35921	NA	NA	NA	NA	NA	NA	NA	-1	NA	NA	NA	NA	NA	NA	NA	0.000585691	NA	NA	NA	NA	NA	NA	NA	NA	NA	NA	NA	NA	NA	NA	0.238175
Heart	Lhcgr	0.573229	NA	NA	NA	NA	NA	NA	NA	1	NA	NA	NA	NA	NA	NA	NA	0.000277643	NA	NA	NA	NA	NA	NA	NA	NA	NA	NA	NA	NA	NA	NA	0.238158
Heart	Col6a2	-13.5155	NA	NA	NA	NA	NA	NA	NA	-1	NA	NA	NA	NA	NA	NA	NA	0.000416664	NA	NA	NA	NA	NA	NA	NA	NA	NA	NA	NA	NA	NA	NA	0.238143
Heart	E030030I06Rik	0.314158	NA	NA	NA	NA	NA	NA	NA	1	NA	NA	NA	NA	NA	NA	NA	0.00999575	NA	NA	NA	NA	NA	NA	NA	NA	NA	NA	NA	NA	NA	NA	0.238075
Heart	Gm47908	0.229017	NA	NA	NA	NA	NA	NA	NA	1	NA	NA	NA	NA	NA	NA	NA	0.0219603	NA	NA	NA	NA	NA	NA	NA	NA	NA	NA	NA	NA	NA	NA	0.23806
Heart	Pex6	-6.67519	NA	NA	NA	NA	NA	NA	NA	-1	NA	NA	NA	NA	NA	NA	NA	0.000294116	NA	NA	NA	NA	NA	NA	NA	NA	NA	NA	NA	NA	NA	NA	0.237914
Heart	Lipe	-10.5161	NA	NA	NA	NA	NA	NA	NA	-1	NA	NA	NA	NA	NA	NA	NA	0.000294599	NA	NA	NA	NA	NA	NA	NA	NA	NA	NA	NA	NA	NA	NA	0.237768
Heart	Satb1	2.55438	NA	NA	NA	NA	NA	NA	NA	1	NA	NA	NA	NA	NA	NA	NA	0.000300672	NA	NA	NA	NA	NA	NA	NA	NA	NA	NA	NA	NA	NA	NA	0.237704
Heart	Arf1	-21.2095	NA	NA	NA	NA	NA	NA	NA	-1	NA	NA	NA	NA	NA	NA	NA	0.000883234	NA	NA	NA	NA	NA	NA	NA	NA	NA	NA	NA	NA	NA	NA	0.237675
Heart	Idh1	215	-10.048	NA	NA	NA	NA	NA	NA	0	-1	NA	NA	NA	NA	NA	NA	0.452429	0.0863158	NA	NA	NA	NA	NA	NA	4.11618	NA	NA	NA	NA	NA	NA	0.237597
Heart	Sema3a	2.3139	NA	NA	NA	NA	NA	NA	NA	1	NA	NA	NA	NA	NA	NA	NA	0.00029774	NA	NA	NA	NA	NA	NA	NA	NA	NA	NA	NA	NA	NA	NA	0.237545
Heart	Olfr1192-ps1	0.970903	NA	NA	NA	NA	NA	NA	NA	1	NA	NA	NA	NA	NA	NA	NA	0.000283821	NA	NA	NA	NA	NA	NA	NA	NA	NA	NA	NA	NA	NA	NA	0.237538
Heart	Tspan32	0.679579	NA	NA	NA	NA	NA	NA	NA	1	NA	NA	NA	NA	NA	NA	NA	0.00257035	NA	NA	NA	NA	NA	NA	NA	NA	NA	NA	NA	NA	NA	NA	0.237444
Heart	Ninl	1.14413	NA	NA	NA	NA	NA	NA	NA	1	NA	NA	NA	NA	NA	NA	NA	0.00264414	NA	NA	NA	NA	NA	NA	NA	NA	NA	NA	NA	NA	NA	NA	0.237344
Heart	Gm40457	0.531137	NA	NA	NA	NA	NA	NA	NA	1	NA	NA	NA	NA	NA	NA	NA	0.000542551	NA	NA	NA	NA	NA	NA	NA	NA	NA	NA	NA	NA	NA	NA	0.237331
Heart	Vps52	-6.24801	NA	NA	NA	NA	NA	NA	NA	-1	NA	NA	NA	NA	NA	NA	NA	0.000297294	NA	NA	NA	NA	NA	NA	NA	NA	NA	NA	NA	NA	NA	NA	0.237284
Heart	Lilr4b	2.42802	NA	NA	NA	NA	NA	NA	NA	1	NA	NA	NA	NA	NA	NA	NA	0.00276976	NA	NA	NA	NA	NA	NA	NA	NA	NA	NA	NA	NA	NA	NA	0.237276
Heart	Fzd9	0.813721	NA	NA	NA	NA	NA	NA	NA	1	NA	NA	NA	NA	NA	NA	NA	0.000328919	NA	NA	NA	NA	NA	NA	NA	NA	NA	NA	NA	NA	NA	NA	0.237104
Heart	Fam220a	-16.0284	NA	NA	NA	NA	NA	NA	NA	-1	NA	NA	NA	NA	NA	NA	NA	0.000319568	NA	NA	NA	NA	NA	NA	NA	NA	NA	NA	NA	NA	NA	NA	0.237051
Heart	Gm15839	0.312581	NA	NA	NA	NA	NA	NA	NA	1	NA	NA	NA	NA	NA	NA	NA	0.00293598	NA	NA	NA	NA	NA	NA	NA	NA	NA	NA	NA	NA	NA	NA	0.23703
Heart	Gm42701	0.495049	NA	NA	NA	NA	NA	NA	NA	1	NA	NA	NA	NA	NA	NA	NA	0.00189561	NA	NA	NA	NA	NA	NA	NA	NA	NA	NA	NA	NA	NA	NA	0.236891
Heart	Capn2	-9.5394	NA	NA	NA	NA	NA	NA	NA	-1	NA	NA	NA	NA	NA	NA	NA	0.000684114	NA	NA	NA	NA	NA	NA	NA	NA	NA	NA	NA	NA	NA	NA	0.236875
Heart	Ube2j2	-3.87544	NA	NA	NA	NA	NA	NA	NA	-1	NA	NA	NA	NA	NA	NA	NA	0.000414904	NA	NA	NA	NA	NA	NA	NA	NA	NA	NA	NA	NA	NA	NA	0.23686
Heart	Gm12131	0.250038	NA	NA	NA	NA	NA	NA	NA	1	NA	NA	NA	NA	NA	NA	NA	0.000288658	NA	NA	NA	NA	NA	NA	NA	NA	NA	NA	NA	NA	NA	NA	0.236662
Heart	Gm37465	0.485634	NA	NA	NA	NA	NA	NA	NA	1	NA	NA	NA	NA	NA	NA	NA	0.0270566	NA	NA	NA	NA	NA	NA	NA	NA	NA	NA	NA	NA	NA	NA	0.236562
Heart	Olfr1151	-0.4863	0.57899	NA	NA	NA	NA	NA	NA	0	1	NA	NA	NA	NA	NA	NA	0.227336	0.0842134	NA	NA	NA	NA	NA	NA	11.2361	NA	NA	NA	NA	NA	NA	0.23651
Heart	Gm12295	2.39582	NA	NA	NA	NA	NA	NA	NA	1	NA	NA	NA	NA	NA	NA	NA	0.000290644	NA	NA	NA	NA	NA	NA	NA	NA	NA	NA	NA	NA	NA	NA	0.236422
Heart	Polr2b	-4.04616	NA	NA	NA	NA	NA	NA	NA	-1	NA	NA	NA	NA	NA	NA	NA	0.000527339	NA	NA	NA	NA	NA	NA	NA	NA	NA	NA	NA	NA	NA	NA	0.23638
Heart	Vac14	-3.6598	16.671	NA	NA	NA	NA	NA	NA	-1	0	NA	NA	NA	NA	NA	NA	0.0917217	0.160459	NA	NA	NA	NA	NA	NA	22.06	NA	NA	NA	NA	NA	NA	0.236371
Heart	Ehd1	-5.31543	NA	NA	NA	NA	NA	NA	NA	-1	NA	NA	NA	NA	NA	NA	NA	0.000331714	NA	NA	NA	NA	NA	NA	NA	NA	NA	NA	NA	NA	NA	NA	0.236247
Heart	Fbxo43	-0.33424	0.7774	NA	NA	NA	NA	NA	NA	0	1	NA	NA	NA	NA	NA	NA	0.224017	0.0848647	NA	NA	NA	NA	NA	NA	14.6855	NA	NA	NA	NA	NA	NA	0.236153
Heart	Olfr187	0.402	-53.524	NA	NA	NA	NA	NA	NA	1	0	NA	NA	NA	NA	NA	NA	0.0800363	0.335835	NA	NA	NA	NA	NA	NA	26.8418	NA	NA	NA	NA	NA	NA	0.236137
Heart	Trp53inp2	-73.8602	NA	NA	NA	NA	NA	NA	NA	-1	NA	NA	NA	NA	NA	NA	NA	0.000296044	NA	NA	NA	NA	NA	NA	NA	NA	NA	NA	NA	NA	NA	NA	0.236136
Heart	Asic5	0.611744	NA	NA	NA	NA	NA	NA	NA	1	NA	NA	NA	NA	NA	NA	NA	0.000410368	NA	NA	NA	NA	NA	NA	NA	NA	NA	NA	NA	NA	NA	NA	0.23609
Heart	Cops5	-2.1795	NA	NA	NA	NA	NA	NA	NA	-1	NA	NA	NA	NA	NA	NA	NA	0.0644077	NA	NA	NA	NA	NA	NA	NA	NA	NA	NA	NA	NA	NA	NA	0.23606
Heart	Eef1a2	-37.9001	NA	NA	NA	NA	NA	NA	NA	-1	NA	NA	NA	NA	NA	NA	NA	0.000575615	NA	NA	NA	NA	NA	NA	NA	NA	NA	NA	NA	NA	NA	NA	0.23605
Heart	Trps1	3.02167	NA	NA	NA	NA	NA	NA	NA	1	NA	NA	NA	NA	NA	NA	NA	0.000350093	NA	NA	NA	NA	NA	NA	NA	NA	NA	NA	NA	NA	NA	NA	0.236006
Heart	Ncbp1	-2.51274	NA	NA	NA	NA	NA	NA	NA	-1	NA	NA	NA	NA	NA	NA	NA	0.000480458	NA	NA	NA	NA	NA	NA	NA	NA	NA	NA	NA	NA	NA	NA	0.235957
Heart	Strap	-9.59683	NA	NA	NA	NA	NA	NA	NA	-1	NA	NA	NA	NA	NA	NA	NA	0.000754628	NA	NA	NA	NA	NA	NA	NA	NA	NA	NA	NA	NA	NA	NA	0.235877
Heart	Vps33a	-3.63702	NA	NA	NA	NA	NA	NA	NA	-1	NA	NA	NA	NA	NA	NA	NA	0.000860704	NA	NA	NA	NA	NA	NA	NA	NA	NA	NA	NA	NA	NA	NA	0.23584
Heart	Gm37663	-52.816	0.81199	NA	NA	NA	NA	NA	NA	0	1	NA	NA	NA	NA	NA	NA	0.378426	0.0976615	NA	NA	NA	NA	NA	NA	3.41562	NA	NA	NA	NA	NA	NA	0.235686
Heart	B630019A10Rik	0.486733	NA	NA	NA	NA	NA	NA	NA	1	NA	NA	NA	NA	NA	NA	NA	0.0170228	NA	NA	NA	NA	NA	NA	NA	NA	NA	NA	NA	NA	NA	NA	0.235653
Heart	Vmn1r-ps53	0.364011	NA	NA	NA	NA	NA	NA	NA	1	NA	NA	NA	NA	NA	NA	NA	0.00030581	NA	NA	NA	NA	NA	NA	NA	NA	NA	NA	NA	NA	NA	NA	0.23538
Heart	Olfr884	0.621726	NA	NA	NA	NA	NA	NA	NA	1	NA	NA	NA	NA	NA	NA	NA	0.000299779	NA	NA	NA	NA	NA	NA	NA	NA	NA	NA	NA	NA	NA	NA	0.235358
Heart	Doc2g	-17.4243	NA	NA	NA	NA	NA	NA	NA	-1	NA	NA	NA	NA	NA	NA	NA	0.000806786	NA	NA	NA	NA	NA	NA	NA	NA	NA	NA	NA	NA	NA	NA	0.235226
Heart	Mesd	-3.36835	NA	NA	NA	NA	NA	NA	NA	-1	NA	NA	NA	NA	NA	NA	NA	0.000306735	NA	NA	NA	NA	NA	NA	NA	NA	NA	NA	NA	NA	NA	NA	0.235222
Heart	Olfr561	0.482979	NA	NA	NA	NA	NA	NA	NA	1	NA	NA	NA	NA	NA	NA	NA	0.000403615	NA	NA	NA	NA	NA	NA	NA	NA	NA	NA	NA	NA	NA	NA	0.235039
Heart	Gm21726	0.181571	NA	NA	NA	NA	NA	NA	NA	1	NA	NA	NA	NA	NA	NA	NA	0.000545625	NA	NA	NA	NA	NA	NA	NA	NA	NA	NA	NA	NA	NA	NA	0.234889
Heart	Csf2rb	1.31801	NA	NA	NA	NA	NA	NA	NA	1	NA	NA	NA	NA	NA	NA	NA	0.000345507	NA	NA	NA	NA	NA	NA	NA	NA	NA	NA	NA	NA	NA	NA	0.234836
Heart	Gria3	1.06096	NA	NA	NA	NA	NA	NA	NA	1	NA	NA	NA	NA	NA	NA	NA	0.00309624	NA	NA	NA	NA	NA	NA	NA	NA	NA	NA	NA	NA	NA	NA	0.234818
Heart	Olfr705	-5.9368	0.7499	NA	NA	NA	NA	NA	NA	0	1	NA	NA	NA	NA	NA	NA	0.480363	0.0781988	NA	NA	NA	NA	NA	NA	4.81941	NA	NA	NA	NA	NA	NA	0.234758
Heart	Rnf187	-20.9668	NA	NA	NA	NA	NA	NA	NA	-1	NA	NA	NA	NA	NA	NA	NA	0.000305458	NA	NA	NA	NA	NA	NA	NA	NA	NA	NA	NA	NA	NA	NA	0.234723
Heart	Wdr93	-0.36753	1.3119	NA	NA	NA	NA	NA	NA	0	1	NA	NA	NA	NA	NA	NA	0.194943	0.0996843	NA	NA	NA	NA	NA	NA	16.8474	NA	NA	NA	NA	NA	NA	0.234475
Heart	Gm48124	-0.082654	19.611	-1.5973	NA	NA	NA	NA	NA	0	0	-1	NA	NA	NA	NA	NA	0.241002	0.356695	0.0967551	NA	NA	NA	NA	NA	20.8172	21.2818	NA	NA	NA	NA	NA	0.234466
Heart	Cacnb4	1.18865	NA	NA	NA	NA	NA	NA	NA	1	NA	NA	NA	NA	NA	NA	NA	0.000666618	NA	NA	NA	NA	NA	NA	NA	NA	NA	NA	NA	NA	NA	NA	0.234438
Heart	Nox1	0.353227	NA	NA	NA	NA	NA	NA	NA	1	NA	NA	NA	NA	NA	NA	NA	0.0498372	NA	NA	NA	NA	NA	NA	NA	NA	NA	NA	NA	NA	NA	NA	0.234408
Heart	Oog1	0.332902	NA	NA	NA	NA	NA	NA	NA	1	NA	NA	NA	NA	NA	NA	NA	0.000763579	NA	NA	NA	NA	NA	NA	NA	NA	NA	NA	NA	NA	NA	NA	0.234354
Heart	Agpat3	-23.4902	NA	NA	NA	NA	NA	NA	NA	-1	NA	NA	NA	NA	NA	NA	NA	0.000543611	NA	NA	NA	NA	NA	NA	NA	NA	NA	NA	NA	NA	NA	NA	0.234336
Heart	Cnksr3	-4.51204	NA	NA	NA	NA	NA	NA	NA	-1	NA	NA	NA	NA	NA	NA	NA	0.000659446	NA	NA	NA	NA	NA	NA	NA	NA	NA	NA	NA	NA	NA	NA	0.234307
Heart	Ube2a	-3.64038	NA	NA	NA	NA	NA	NA	NA	-1	NA	NA	NA	NA	NA	NA	NA	0.00372995	NA	NA	NA	NA	NA	NA	NA	NA	NA	NA	NA	NA	NA	NA	0.234306
Heart	Ddx60	2.19547	NA	NA	NA	NA	NA	NA	NA	1	NA	NA	NA	NA	NA	NA	NA	0.00248943	NA	NA	NA	NA	NA	NA	NA	NA	NA	NA	NA	NA	NA	NA	0.234132
Heart	Swsap1	-0.276747	NA	NA	NA	NA	NA	NA	NA	-1	NA	NA	NA	NA	NA	NA	NA	0.0813458	NA	NA	NA	NA	NA	NA	NA	NA	NA	NA	NA	NA	NA	NA	0.234131
Heart	Fbln2	-12.5523	NA	NA	NA	NA	NA	NA	NA	-1	NA	NA	NA	NA	NA	NA	NA	0.0529089	NA	NA	NA	NA	NA	NA	NA	NA	NA	NA	NA	NA	NA	NA	0.233998
Heart	H2-Q6	17.721	NA	NA	NA	NA	NA	NA	NA	1	NA	NA	NA	NA	NA	NA	NA	0.000340493	NA	NA	NA	NA	NA	NA	NA	NA	NA	NA	NA	NA	NA	NA	0.233904
Heart	Mn1	10.154	-8.2877	NA	NA	NA	NA	NA	NA	0	-1	NA	NA	NA	NA	NA	NA	0.19289	0.097398	NA	NA	NA	NA	NA	NA	10.4647	NA	NA	NA	NA	NA	NA	0.233815
Heart	Zfp804b	0.81793	NA	NA	NA	NA	NA	NA	NA	1	NA	NA	NA	NA	NA	NA	NA	0.000382996	NA	NA	NA	NA	NA	NA	NA	NA	NA	NA	NA	NA	NA	NA	0.233792
Heart	Dnajb2	-11.1574	NA	NA	NA	NA	NA	NA	NA	-1	NA	NA	NA	NA	NA	NA	NA	0.000318175	NA	NA	NA	NA	NA	NA	NA	NA	NA	NA	NA	NA	NA	NA	0.233712
Heart	4930548K13Rik	0.262907	NA	NA	NA	NA	NA	NA	NA	1	NA	NA	NA	NA	NA	NA	NA	0.000315992	NA	NA	NA	NA	NA	NA	NA	NA	NA	NA	NA	NA	NA	NA	0.233577
Heart	Itgae	0.660591	NA	NA	NA	NA	NA	NA	NA	1	NA	NA	NA	NA	NA	NA	NA	0.00122682	NA	NA	NA	NA	NA	NA	NA	NA	NA	NA	NA	NA	NA	NA	0.233572
Heart	Zfp691	2.3471	-2.372	NA	NA	NA	NA	NA	NA	0	-1	NA	NA	NA	NA	NA	NA	0.128967	0.0978914	NA	NA	NA	NA	NA	NA	14.9435	NA	NA	NA	NA	NA	NA	0.233556
Heart	Eef1g	-9.6785	NA	NA	NA	NA	NA	NA	NA	-1	NA	NA	NA	NA	NA	NA	NA	0.000493308	NA	NA	NA	NA	NA	NA	NA	NA	NA	NA	NA	NA	NA	NA	0.233546
Heart	Immp1l	-5.49502	NA	NA	NA	NA	NA	NA	NA	-1	NA	NA	NA	NA	NA	NA	NA	0.000474151	NA	NA	NA	NA	NA	NA	NA	NA	NA	NA	NA	NA	NA	NA	0.233434
Heart	Alkbh7	-4.86999	NA	NA	NA	NA	NA	NA	NA	-1	NA	NA	NA	NA	NA	NA	NA	0.00056598	NA	NA	NA	NA	NA	NA	NA	NA	NA	NA	NA	NA	NA	NA	0.233407
Heart	Sys1	-3.20305	NA	NA	NA	NA	NA	NA	NA	-1	NA	NA	NA	NA	NA	NA	NA	0.000333576	NA	NA	NA	NA	NA	NA	NA	NA	NA	NA	NA	NA	NA	NA	0.233405
Heart	4930594C11Rik	0.30397	NA	NA	NA	NA	NA	NA	NA	1	NA	NA	NA	NA	NA	NA	NA	0.000692147	NA	NA	NA	NA	NA	NA	NA	NA	NA	NA	NA	NA	NA	NA	0.233383
Heart	Gm47078	0.290018	NA	NA	NA	NA	NA	NA	NA	1	NA	NA	NA	NA	NA	NA	NA	0.00127253	NA	NA	NA	NA	NA	NA	NA	NA	NA	NA	NA	NA	NA	NA	0.233348
Heart	Flad1	-5.25462	NA	NA	NA	NA	NA	NA	NA	-1	NA	NA	NA	NA	NA	NA	NA	0.00289158	NA	NA	NA	NA	NA	NA	NA	NA	NA	NA	NA	NA	NA	NA	0.23333
Heart	Vezf1	-2.07912	NA	NA	NA	NA	NA	NA	NA	-1	NA	NA	NA	NA	NA	NA	NA	0.000671748	NA	NA	NA	NA	NA	NA	NA	NA	NA	NA	NA	NA	NA	NA	0.233167
Heart	Gm42843	0.91972	NA	NA	NA	NA	NA	NA	NA	1	NA	NA	NA	NA	NA	NA	NA	0.00032713	NA	NA	NA	NA	NA	NA	NA	NA	NA	NA	NA	NA	NA	NA	0.233157
Heart	Olfr1099	0.583385	NA	NA	NA	NA	NA	NA	NA	1	NA	NA	NA	NA	NA	NA	NA	0.000331375	NA	NA	NA	NA	NA	NA	NA	NA	NA	NA	NA	NA	NA	NA	0.233128
[truncated: 5,623 more rows]
